# Supplementary material for: Trichinella spiralis-induced mastocytosis and erythropoiesis are simultaneously supported by a bipotent mast cell/erythrocyte precursor cell
Source: PubMed Central journal article supplement (PMC7259795; doi:10.1371/journal.ppat.1008579), 2020-05-18
Supplement: ppat.1008579.s007.pdf [file ppat.1008579.s007.pdf]

| p value   | Av_log FC    | pct.1 | pct.2 | p_val_adj | cluster | gene symbol | Predicted cell type |
|-----------|--------------|-------|-------|-----------|---------|-------------|---------------------|
| 2.16E-222 | 1.211418752  | 0.996 | 0.51  | 2.85E-218 | 0       | Chil3       | Neutrophil          |
| 1.94E-213 | 1.267768556  | 1     | 0.924 | 2.56E-209 | 0       | Camp        |                     |
| 5.58E-195 | 1.222154003  | 1     | 0.835 | 7.36E-191 | 0       | Ngp         |                     |
| 9.51E-186 | 1.176517108  | 0.687 | 0.162 | 1.25E-181 | 0       | Fcnb        |                     |
| 2.16E-183 | 1.065804766  | 0.966 | 0.551 | 2.85E-179 | 0       | Hmgn2       |                     |
| 3.11E-172 | 0.99968864   | 1     | 0.516 | 4.10E-168 | 0       | Lcn2        |                     |
| 1.78E-165 | 0.940500031  | 0.961 | 0.398 | 2.35E-161 | 0       | Pglyrp1     |                     |
| 8.51E-165 | 1.099093172  | 1     | 0.999 | 1.12E-160 | 0       | S100a8      |                     |
| 1.68E-163 | 0.97260825   | 1     | 0.595 | 2.22E-159 | 0       | Wfdc21      |                     |
| 3.48E-161 | 0.927008053  | 0.991 | 0.498 | 4.59E-157 | 0       | Ltf         |                     |
| 6.57E-161 | 1.099898095  | 1     | 0.994 | 8.66E-157 | 0       | S100a9      |                     |
| 4.16E-134 | -0.901990192 | 0.948 | 0.957 | 5.49E-130 | 0       | Rps27       |                     |
| 3.22E-131 | 0.965445249  | 0.679 | 0.218 | 4.25E-127 | 0       | Gm10282     |                     |
| 5.40E-128 | -1.301794883 | 0.748 | 0.869 | 7.12E-124 | 0       | Rpl35       |                     |
| 6.54E-126 | -1.103082612 | 0.863 | 0.905 | 8.63E-122 | 0       | Rps28       |                     |
| 8.70E-126 | -0.97838138  | 0.966 | 0.955 | 1.15E-121 | 0       | Rpl41       |                     |
| 1.69E-122 | -1.09546059  | 0.806 | 0.881 | 2.23E-118 | 0       | Rpl18a      |                     |
| 2.44E-120 | -1.190330703 | 0.762 | 0.86  | 3.22E-116 | 0       | Rpl13       |                     |
| 1.71E-119 | 0.833005161  | 0.62  | 0.175 | 2.25E-115 | 0       | Cd177       |                     |
| 4.23E-119 | -1.02797304  | 0.819 | 0.887 | 5.58E-115 | 0       | Rps14       |                     |
| 8.15E-116 | -0.983918779 | 0.851 | 0.907 | 1.08E-111 | 0       | Rpl37       |                     |
| 8.31E-112 | 0.888600704  | 0.542 | 0.147 | 1.10E-107 | 0       | Cebpe       |                     |
| 8.21E-109 | -1.148041284 | 0.757 | 0.843 | 1.08E-104 | 0       | Rps18       |                     |
| 1.76E-108 | -0.845327973 | 0.924 | 0.94  | 2.33E-104 | 0       | Rpl37a      |                     |
| 4.24E-107 | -0.710538715 | 0.996 | 0.974 | 5.59E-103 | 0       | Rps29       |                     |
| 5.50E-107 | -1.215206774 | 0.636 | 0.799 | 7.25E-103 | 0       | Rps5        |                     |
| 1.34E-102 | -0.945762127 | 0.877 | 0.898 | 1.77E-98  | 0       | Rps19       |                     |
| 3.73E-99  | -1.068957037 | 0.693 | 0.82  | 4.92E-95  | 0       | Rpl13a      |                     |
| 7.19E-99  | -1.094885079 | 0.67  | 0.806 | 9.48E-95  | 0       | Rps11       |                     |

|          |              |       |       |          |           |
|----------|--------------|-------|-------|----------|-----------|
| 1.23E-98 | -1.325127207 | 0.425 | 0.722 | 1.62E-94 | 0 Rpl10   |
| 6.21E-97 | -1.209288782 | 0.625 | 0.779 | 8.19E-93 | 0 Rpl36   |
| 1.03E-95 | 0.619507796  | 0.97  | 0.761 | 1.36E-91 | 0 Hmgb2   |
| 1.16E-93 | 0.655875943  | 0.847 | 0.389 | 1.53E-89 | 0 Anxa1   |
| 5.78E-93 | -0.95195122  | 0.831 | 0.871 | 7.63E-89 | 0 Rpl32   |
| 7.31E-92 | -1.246702651 | 0.54  | 0.74  | 9.64E-88 | 0 Rplp1   |
| 1.96E-90 | -1.22623236  | 0.504 | 0.731 | 2.59E-86 | 0 Rplp0   |
| 2.20E-90 | -1.961981353 | 0.563 | 0.757 | 2.90E-86 | 0 Tmsb10  |
| 2.54E-90 | -0.907470428 | 0.776 | 0.851 | 3.34E-86 | 0 Rps27rt |
| 1.48E-89 | -1.01346154  | 0.655 | 0.793 | 1.95E-85 | 0 Rpl26   |
| 1.64E-87 | -0.991071357 | 0.714 | 0.82  | 2.16E-83 | 0 Rps23   |
| 3.55E-85 | -1.121624842 | 0.552 | 0.742 | 4.68E-81 | 0 Rps4x   |
| 1.70E-84 | -0.870333654 | 0.801 | 0.854 | 2.24E-80 | 0 Rpl38   |
| 5.67E-84 | -0.963599543 | 0.794 | 0.84  | 7.47E-80 | 0 Rps8    |
| 1.54E-82 | -0.987807108 | 0.67  | 0.782 | 2.03E-78 | 0 Rps3a1  |
| 3.58E-82 | 0.691401102  | 0.504 | 0.155 | 4.72E-78 | 0 Adpgk   |
| 1.63E-80 | -0.743177549 | 0.849 | 0.875 | 2.15E-76 | 0 Rps9    |
| 1.99E-79 | -1.054231293 | 0.568 | 0.736 | 2.62E-75 | 0 Rpl27a  |
| 9.95E-79 | -0.990027203 | 0.673 | 0.786 | 1.31E-74 | 0 Rpl39   |
| 1.65E-77 | -1.178774749 | 0.481 | 0.694 | 2.18E-73 | 0 Gm2000  |
| 1.08E-76 | -1.001208488 | 0.623 | 0.759 | 1.42E-72 | 0 Rps6    |
| 2.17E-76 | -1.920514062 | 0.384 | 0.661 | 2.86E-72 | 0 Crip1   |
| 1.18E-75 | -0.850199517 | 0.758 | 0.812 | 1.56E-71 | 0 Rps16   |
| 4.77E-74 | -0.824817997 | 0.755 | 0.825 | 6.30E-70 | 0 Rpl23a  |
| 9.34E-73 | -1.12325883  | 0.453 | 0.679 | 1.23E-68 | 0 Eef1a1  |
| 1.02E-72 | -0.69400177  | 0.858 | 0.879 | 1.34E-68 | 0 Rps27a  |
| 1.30E-72 | -0.953467526 | 0.634 | 0.765 | 1.71E-68 | 0 Gm10076 |
| 5.22E-72 | -1.018862023 | 0.602 | 0.736 | 6.89E-68 | 0 Rps26   |
| 2.02E-71 | -0.802476715 | 0.739 | 0.811 | 2.66E-67 | 0 Rpl34   |
| 3.14E-71 | 0.547485748  | 0.936 | 0.639 | 4.14E-67 | 0 Arhgdib |
| 6.04E-71 | -1.115892777 | 0.517 | 0.702 | 7.97E-67 | 0 Rpl14   |

|          |              |       |       |          |             |
|----------|--------------|-------|-------|----------|-------------|
| 5.16E-70 | 0.650169227  | 0.382 | 0.107 | 6.81E-66 | 0 Syne1     |
| 1.84E-69 | -0.878115511 | 0.655 | 0.773 | 2.43E-65 | 0 Rpl17     |
| 3.52E-69 | -1.798575028 | 0.156 | 0.508 | 4.64E-65 | 0 Lgals1    |
| 6.60E-69 | -0.932746596 | 0.574 | 0.736 | 8.71E-65 | 0 Rpl19     |
| 5.96E-68 | -1.228534291 | 0.51  | 0.701 | 7.87E-64 | 0 Plac8     |
| 5.95E-67 | 0.625263022  | 0.318 | 0.08  | 7.85E-63 | 0 Fam101b   |
| 7.89E-67 | -0.848417463 | 0.723 | 0.783 | 1.04E-62 | 0 Rplp2     |
| 1.03E-65 | 0.616367847  | 0.428 | 0.133 | 1.36E-61 | 0 Cd9       |
| 2.00E-65 | -1.181035922 | 0.368 | 0.622 | 2.64E-61 | 0 Rpl3      |
| 3.01E-65 | -0.946520612 | 0.6   | 0.733 | 3.97E-61 | 0 Rpl6      |
| 9.19E-65 | -0.869314282 | 0.659 | 0.753 | 1.21E-60 | 0 Rpl24     |
| 1.60E-64 | 0.647898756  | 0.291 | 0.072 | 2.11E-60 | 0 Gca       |
| 2.01E-64 | -0.816453153 | 0.686 | 0.776 | 2.66E-60 | 0 Rpl21     |
| 1.25E-63 | -1.042352898 | 0.472 | 0.663 | 1.65E-59 | 0 Gm10263   |
| 1.52E-62 | -0.952784771 | 0.549 | 0.705 | 2.00E-58 | 0 Rps7      |
| 1.60E-62 | -1.444792174 | 0.156 | 0.499 | 2.11E-58 | 0 Ly6e      |
| 3.19E-62 | 0.63033009   | 0.364 | 0.108 | 4.21E-58 | 0 Trem3     |
| 1.13E-61 | -0.83223059  | 0.663 | 0.757 | 1.49E-57 | 0 Rps15a    |
| 1.43E-61 | 0.584639303  | 0.741 | 0.363 | 1.88E-57 | 0 Dstn      |
| 5.84E-61 | -0.731414096 | 0.753 | 0.81  | 7.71E-57 | 0 Rps24     |
| 1.75E-60 | 0.733294825  | 0.396 | 0.132 | 2.30E-56 | 0 Ube2c     |
| 1.85E-60 | -0.815971599 | 0.801 | 0.823 | 2.44E-56 | 0 Ftl1      |
| 5.71E-59 | -0.602540312 | 0.872 | 0.872 | 7.53E-55 | 0 Rpl35a    |
| 4.61E-57 | 0.509803516  | 0.302 | 0.081 | 6.08E-53 | 0 Lrg1      |
| 2.62E-56 | -0.761616437 | 0.698 | 0.767 | 3.46E-52 | 0 Rps3      |
| 2.98E-56 | -1.267933365 | 0.183 | 0.494 | 3.93E-52 | 0 Rpl10-ps3 |
| 1.83E-55 | -1.019186962 | 0.474 | 0.66  | 2.42E-51 | 0 Rpl36a    |
| 2.77E-54 | 0.44313168   | 0.718 | 0.353 | 3.65E-50 | 0 Hist1h2ap |
| 3.22E-54 | 0.51264858   | 0.787 | 0.423 | 4.25E-50 | 0 Hp        |
| 3.94E-54 | -1.069616699 | 0.389 | 0.597 | 5.19E-50 | 0 Rpl15     |
| 6.45E-54 | -0.505093945 | 0.929 | 0.918 | 8.51E-50 | 0 Fau       |

|          |              |       |       |          |                 |
|----------|--------------|-------|-------|----------|-----------------|
| 1.68E-53 | -0.841754562 | 0.602 | 0.716 | 2.21E-49 | 0 Sub1          |
| 1.00E-52 | 0.654046063  | 0.306 | 0.094 | 1.32E-48 | 0 Spc25         |
| 1.20E-52 | 0.557581595  | 0.803 | 0.447 | 1.59E-48 | 0 F630028O10Rik |
| 2.34E-52 | -0.948638476 | 0.547 | 0.67  | 3.09E-48 | 0 Rps12         |
| 3.22E-52 | -0.473310325 | 0.961 | 0.954 | 4.25E-48 | 0 mt-Co3        |
| 3.75E-52 | -0.820562915 | 0.567 | 0.691 | 4.95E-48 | 0 Rpl27         |
| 3.86E-52 | -0.850357981 | 0.519 | 0.685 | 5.09E-48 | 0 Rpl23a-ps3    |
| 9.10E-52 | -0.898374459 | 0.52  | 0.66  | 1.20E-47 | 0 Rpl8          |
| 1.18E-51 | 0.588118515  | 0.497 | 0.203 | 1.56E-47 | 0 Cpne3         |
| 1.55E-51 | 0.582973453  | 0.472 | 0.187 | 2.04E-47 | 0 Serpinb1a     |
| 2.48E-51 | -1.218250706 | 0.215 | 0.494 | 3.27E-47 | 0 Gm8730        |
| 2.84E-51 | -0.624401335 | 0.854 | 0.86  | 3.74E-47 | 0 mt-Atp6       |
| 5.30E-51 | 0.503912234  | 0.382 | 0.128 | 6.99E-47 | 0 Id2           |
| 5.48E-51 | -0.772154156 | 0.703 | 0.745 | 7.23E-47 | 0 Rpl23         |
| 1.31E-50 | -0.826556707 | 0.623 | 0.717 | 1.72E-46 | 0 Rpl31         |
| 2.26E-50 | -0.802774374 | 0.654 | 0.723 | 2.98E-46 | 0 Rpl11         |
| 3.73E-50 | -1.220009145 | 0.178 | 0.465 | 4.92E-46 | 0 Gm10073       |
| 7.41E-50 | -1.025052598 | 0.396 | 0.593 | 9.77E-46 | 0 Rpl10a        |
| 1.11E-49 | -0.880563085 | 0.508 | 0.657 | 1.47E-45 | 0 Rpl18         |
| 3.67E-48 | -0.698836559 | 0.698 | 0.75  | 4.84E-44 | 0 Rpl9          |
| 4.04E-48 | -0.790936216 | 0.586 | 0.702 | 5.33E-44 | 0 Rps13         |
| 3.14E-47 | 0.5752311    | 0.362 | 0.129 | 4.14E-43 | 0 Lta4h         |
| 1.41E-46 | -0.676804107 | 0.689 | 0.75  | 1.86E-42 | 0 Rps15         |
| 4.23E-46 | -1.087209062 | 0.384 | 0.571 | 5.58E-42 | 0 Rps2          |
| 6.61E-46 | 0.620614707  | 0.373 | 0.141 | 8.72E-42 | 0 Nusap1        |
| 1.01E-45 | -0.912100787 | 0.437 | 0.605 | 1.33E-41 | 0 Wdr89         |
| 1.46E-45 | 0.434967079  | 0.488 | 0.198 | 1.92E-41 | 0 Cd63          |
| 1.95E-45 | -0.73759513  | 0.666 | 0.714 | 2.57E-41 | 0 Rpl28         |
| 1.11E-44 | -0.694587953 | 0.67  | 0.733 | 1.47E-40 | 0 Rps25         |
| 3.69E-44 | -1.074701808 | 0.242 | 0.492 | 4.86E-40 | 0 Rps18-ps3     |
| 4.07E-44 | -0.898188132 | 0.437 | 0.605 | 5.37E-40 | 0 Rpl4          |

|          |              |       |       |          |                 |
|----------|--------------|-------|-------|----------|-----------------|
| 1.39E-43 | -0.704281034 | 0.602 | 0.717 | 1.84E-39 | 0 Tpt1          |
| 8.12E-43 | 0.536811188  | 0.456 | 0.19  | 1.07E-38 | 0 C3            |
| 2.37E-42 | -1.149157427 | 0.185 | 0.451 | 3.13E-38 | 0 Prdx1         |
| 2.46E-42 | -1.104719991 | 0.286 | 0.503 | 3.25E-38 | 0 Rpl12         |
| 2.97E-42 | -0.960563383 | 0.341 | 0.544 | 3.92E-38 | 0 Rpl22         |
| 3.26E-42 | 0.439081254  | 0.625 | 0.306 | 4.31E-38 | 0 2810417H13Rik |
| 3.65E-42 | 0.526723215  | 0.291 | 0.095 | 4.82E-38 | 0 Mgst2         |
| 3.77E-42 | 0.545295491  | 0.655 | 0.358 | 4.97E-38 | 0 1810037I17Rik |
| 5.32E-42 | -0.745769685 | 0.613 | 0.69  | 7.02E-38 | 0 Rpsa          |
| 7.76E-42 | 0.512857072  | 0.405 | 0.16  | 1.02E-37 | 0 Ckap4         |
| 7.82E-42 | -1.229864131 | 0.368 | 0.56  | 1.03E-37 | 0 Psap          |
| 3.10E-41 | -0.706717394 | 0.679 | 0.725 | 4.09E-37 | 0 Rps17         |
| 5.22E-41 | -0.955816697 | 0.519 | 0.654 | 6.89E-37 | 0 Fth1          |
| 5.94E-40 | -0.686107431 | 0.705 | 0.777 | 7.83E-36 | 0 B2m           |
| 7.82E-40 | -1.110490784 | 0.174 | 0.425 | 1.03E-35 | 0 Rpl36-ps3     |
| 1.06E-39 | -0.830588903 | 0.483 | 0.633 | 1.40E-35 | 0 mt-Nd1        |
| 1.25E-39 | 0.479273913  | 0.252 | 0.077 | 1.65E-35 | 0 Actn1         |
| 1.56E-39 | -1.43406073  | 0.083 | 0.34  | 2.06E-35 | 0 Ms4a6c        |
| 1.81E-39 | 0.345783739  | 0.925 | 0.661 | 2.39E-35 | 0 Cyba          |
| 4.77E-39 | -0.726099024 | 0.581 | 0.665 | 6.29E-35 | 0 Rps10         |
| 8.92E-39 | -0.671533649 | 0.616 | 0.712 | 1.18E-34 | 0 mt-Cytb       |
| 1.16E-38 | 0.397973795  | 0.519 | 0.233 | 1.53E-34 | 0 Lmo4          |
| 2.33E-38 | -1.230520945 | 0.352 | 0.549 | 3.07E-34 | 0 S100a6        |
| 8.01E-38 | 0.364769006  | 0.886 | 0.622 | 1.06E-33 | 0 Prdx5         |
| 1.80E-37 | 0.388631536  | 0.522 | 0.239 | 2.38E-33 | 0 Ncf1          |
| 4.43E-37 | 0.460669147  | 0.295 | 0.103 | 5.85E-33 | 0 Arrb2         |
| 2.36E-36 | -0.774920934 | 0.506 | 0.618 | 3.11E-32 | 0 Rps21         |
| 1.22E-35 | 0.419280328  | 0.52  | 0.241 | 1.61E-31 | 0 Clec4a2       |
| 1.41E-35 | -0.983679409 | 0.234 | 0.454 | 1.86E-31 | 0 Rpl13-ps3     |
| 1.45E-35 | -1.407687739 | 0.057 | 0.295 | 1.92E-31 | 0 Ccr2          |
| 2.73E-35 | -0.538689802 | 1     | 0.997 | 3.60E-31 | 0 Malat1        |

|          |              |       |       |          |             |
|----------|--------------|-------|-------|----------|-------------|
| 3.57E-35 | -0.70752639  | 0.529 | 0.641 | 4.71E-31 | 0 Uba52     |
| 5.01E-35 | -0.699024976 | 0.6   | 0.668 | 6.60E-31 | 0 Rps20     |
| 1.01E-34 | 0.431230574  | 0.583 | 0.299 | 1.33E-30 | 0 Scp2      |
| 1.40E-34 | -1.023062558 | 0.222 | 0.438 | 1.84E-30 | 0 Hsp90ab1  |
| 1.57E-34 | -0.688962212 | 0.528 | 0.648 | 2.08E-30 | 0 Sec61g    |
| 1.38E-33 | 0.464178338  | 0.268 | 0.097 | 1.82E-29 | 0 Cenpf     |
| 1.46E-33 | 0.414197073  | 0.691 | 0.398 | 1.93E-29 | 0 Tkt       |
| 3.63E-33 | 0.345915531  | 0.794 | 0.473 | 4.79E-29 | 0 Cybb      |
| 7.99E-33 | -0.698884498 | 0.517 | 0.62  | 1.05E-28 | 0 Gm11808   |
| 2.90E-32 | -0.898052344 | 0.24  | 0.453 | 3.82E-28 | 0 Gm9493    |
| 4.63E-32 | -0.854663116 | 0.282 | 0.482 | 6.11E-28 | 0 Rpl30     |
| 5.13E-32 | 0.380474868  | 0.565 | 0.295 | 6.76E-28 | 0 Top2a     |
| 6.32E-32 | 0.47553769   | 0.437 | 0.209 | 8.33E-28 | 0 Smc2      |
| 1.05E-31 | -1.203097274 | 0.062 | 0.283 | 1.39E-27 | 0 S100a10   |
| 3.76E-31 | -1.012248158 | 0.19  | 0.401 | 4.96E-27 | 0 Npm1      |
| 5.56E-31 | -1.555390152 | 0.167 | 0.377 | 7.34E-27 | 0 Ifi2712a  |
| 5.57E-31 | -0.909972368 | 0.295 | 0.473 | 7.34E-27 | 0 Rps12-ps3 |
| 7.60E-31 | -1.233875268 | 0.098 | 0.313 | 1.00E-26 | 0 Pdcd4     |
| 7.65E-31 | 0.439486966  | 0.382 | 0.174 | 1.01E-26 | 0 Rrm2      |
| 2.54E-30 | -0.482393416 | 0.78  | 0.792 | 3.35E-26 | 0 Gm9843    |
| 5.21E-30 | 0.297395381  | 0.975 | 0.805 | 6.88E-26 | 0 H2afz     |
| 1.76E-29 | -1.181799918 | 0.066 | 0.276 | 2.32E-25 | 0 Gm9844    |
| 4.52E-29 | -0.840318883 | 0.329 | 0.489 | 5.97E-25 | 0 Rps26-ps1 |
| 4.85E-29 | -0.822573513 | 0.314 | 0.485 | 6.40E-25 | 0 Rpl29     |
| 5.12E-29 | -0.311704929 | 0.988 | 0.978 | 6.76E-25 | 0 mt-Co1    |
| 5.37E-29 | -0.904716355 | 0.561 | 0.639 | 7.08E-25 | 0 Cst3      |
| 2.92E-28 | -1.119103066 | 0.052 | 0.254 | 3.85E-24 | 0 Zeb2      |
| 3.37E-28 | -0.830423396 | 0.256 | 0.448 | 4.44E-24 | 0 Rpl5      |
| 1.80E-27 | 0.362258808  | 0.487 | 0.248 | 2.37E-23 | 0 Gpi1      |
| 2.03E-27 | 0.452877066  | 0.403 | 0.199 | 2.68E-23 | 0 Mki67     |
| 3.64E-27 | -0.694628207 | 0.423 | 0.559 | 4.80E-23 | 0 Rpl7      |

|          |              |       |       |          |             |
|----------|--------------|-------|-------|----------|-------------|
| 4.43E-27 | 0.335029673  | 0.261 | 0.1   | 5.85E-23 | 0 Ets1      |
| 7.36E-27 | -0.784242703 | 0.332 | 0.488 | 9.71E-23 | 0 Rpl27-ps3 |
| 1.42E-26 | 0.426299005  | 0.256 | 0.1   | 1.88E-22 | 0 Pygl      |
| 1.67E-26 | -0.810168638 | 0.277 | 0.454 | 2.21E-22 | 0 Gnb2l1    |
| 1.84E-26 | 0.363215024  | 0.606 | 0.343 | 2.43E-22 | 0 Gsr       |
| 3.31E-26 | -0.749969132 | 0.462 | 0.588 | 4.36E-22 | 0 H2-D1     |
| 4.65E-26 | -0.680597112 | 0.487 | 0.582 | 6.13E-22 | 0 Rpl36al   |
| 5.75E-26 | 0.37889876   | 0.327 | 0.145 | 7.59E-22 | 0 Ncf4      |
| 8.49E-26 | 0.469154361  | 0.364 | 0.178 | 1.12E-21 | 0 Tuba4a    |
| 8.88E-26 | 0.426795684  | 0.382 | 0.189 | 1.17E-21 | 0 Birc5     |
| 4.49E-25 | -0.67081074  | 0.472 | 0.58  | 5.92E-21 | 0 mt-Nd4    |
| 1.14E-24 | -0.919948109 | 0.11  | 0.301 | 1.51E-20 | 0 Eef1g     |
| 1.51E-24 | -0.845267698 | 0.179 | 0.367 | 1.99E-20 | 0 Rpl6l     |
| 2.17E-24 | -0.954684513 | 0.149 | 0.339 | 2.86E-20 | 0 Npc2      |
| 2.23E-24 | -0.761945272 | 0.268 | 0.442 | 2.94E-20 | 0 Eef2      |
| 3.93E-24 | -0.834930473 | 0.306 | 0.462 | 5.19E-20 | 0 Psm7      |
| 4.26E-23 | 0.312643718  | 0.48  | 0.255 | 5.62E-19 | 0 Aldh2     |
| 1.43E-22 | -0.83946905  | 0.178 | 0.352 | 1.88E-18 | 0 Nop10     |
| 4.75E-22 | -0.909410686 | 0.192 | 0.36  | 6.27E-18 | 0 H2afy     |
| 5.33E-22 | 0.335015986  | 0.694 | 0.448 | 7.03E-18 | 0 Txn1      |
| 4.01E-21 | 0.309914979  | 0.694 | 0.442 | 5.28E-17 | 0 Rac2      |
| 5.31E-21 | -0.69623613  | 0.414 | 0.514 | 7.00E-17 | 0 Rpl22l1   |
| 6.39E-21 | -0.785803587 | 0.147 | 0.321 | 8.43E-17 | 0 Polr2l    |
| 2.55E-20 | 0.332998227  | 0.311 | 0.151 | 3.37E-16 | 0 Tecr      |
| 7.18E-20 | -0.782100243 | 0.131 | 0.298 | 9.47E-16 | 0 Gm10269   |
| 8.48E-20 | -0.717588802 | 0.227 | 0.39  | 1.12E-15 | 0 Btf3      |
| 1.34E-19 | -0.658202076 | 0.377 | 0.487 | 1.77E-15 | 0 Rps27l    |
| 2.98E-19 | 0.28794638   | 0.261 | 0.118 | 3.93E-15 | 0 Vasp      |
| 3.87E-19 | 0.310653716  | 0.291 | 0.139 | 5.11E-15 | 0 Glrx      |
| 1.51E-18 | -0.732195291 | 0.171 | 0.332 | 1.99E-14 | 0 Eef1b2    |
| 1.84E-18 | 0.336010012  | 0.423 | 0.243 | 2.43E-14 | 0 Aprt      |

|          |              |       |       |          |            |
|----------|--------------|-------|-------|----------|------------|
| 3.12E-18 | -0.774069862 | 0.16  | 0.318 | 4.12E-14 | 0 mt-Nd2   |
| 6.36E-18 | -0.859776903 | 0.107 | 0.257 | 8.39E-14 | 0 Calr     |
| 1.64E-17 | -0.596884146 | 0.405 | 0.509 | 2.16E-13 | 0 Rpl7a    |
| 1.91E-17 | 0.384635918  | 0.334 | 0.184 | 2.52E-13 | 0 Smc4     |
| 2.41E-17 | 0.281812332  | 0.526 | 0.314 | 3.18E-13 | 0 Clec12a  |
| 2.45E-17 | -0.621221903 | 0.336 | 0.459 | 3.23E-13 | 0 Rpl9-ps6 |
| 4.48E-17 | -1.008458263 | 0.51  | 0.563 | 5.90E-13 | 0 Ifitm3   |
| 5.41E-17 | 0.288663373  | 0.465 | 0.276 | 7.14E-13 | 0 Ppp1cb   |
| 1.00E-16 | 0.261792233  | 0.272 | 0.131 | 1.33E-12 | 0 Gpsm3    |
| 1.15E-16 | 0.25830262   | 0.332 | 0.173 | 1.52E-12 | 0 Hcst     |
| 1.37E-16 | -0.751086704 | 0.215 | 0.354 | 1.80E-12 | 0 Set      |
| 1.71E-16 | 0.27049247   | 0.508 | 0.309 | 2.25E-12 | 0 Cks2     |
| 1.72E-16 | -0.562896369 | 0.485 | 0.551 | 2.27E-12 | 0 Hspa8    |
| 2.08E-16 | 0.289639906  | 0.321 | 0.172 | 2.74E-12 | 0 Lockd    |
| 2.80E-16 | -0.812600789 | 0.126 | 0.267 | 3.69E-12 | 0 Ncl      |
| 3.11E-16 | -0.751539565 | 0.119 | 0.264 | 4.10E-12 | 0 Psmb8    |
| 3.31E-16 | 0.304486283  | 0.359 | 0.2   | 4.36E-12 | 0 Rad21    |
| 4.63E-16 | -0.748024841 | 0.211 | 0.347 | 6.11E-12 | 0 Hnrnpa1  |
| 5.77E-16 | -0.584746968 | 0.44  | 0.514 | 7.61E-12 | 0 Sec61b   |
| 6.20E-16 | 0.296370163  | 0.302 | 0.159 | 8.18E-12 | 0 Tmed3    |
| 7.32E-16 | -0.624305535 | 0.337 | 0.443 | 9.65E-12 | 0 Ybx1     |
| 7.93E-16 | -0.827316843 | 0.121 | 0.257 | 1.05E-11 | 0 Fxyd5    |
| 8.96E-16 | -0.696082922 | 0.199 | 0.333 | 1.18E-11 | 0 Gm10036  |
| 9.09E-16 | 0.335042625  | 0.288 | 0.151 | 1.20E-11 | 0 H2afx    |
| 1.03E-15 | -0.76327963  | 0.233 | 0.37  | 1.36E-11 | 0 H2-K1    |
| 2.99E-15 | 0.264772921  | 0.32  | 0.171 | 3.94E-11 | 0 Ogfrl1   |
| 3.59E-15 | -0.612738835 | 0.417 | 0.512 | 4.74E-11 | 0 Mbnl1    |
| 3.94E-15 | -0.413795837 | 0.631 | 0.651 | 5.20E-11 | 0 Atp5l    |
| 5.03E-15 | -0.778260023 | 0.199 | 0.328 | 6.64E-11 | 0 Lsp1     |
| 1.14E-14 | -0.479868031 | 0.867 | 0.81  | 1.50E-10 | 0 Tyrobp   |
| 1.21E-14 | -0.677202626 | 0.194 | 0.331 | 1.60E-10 | 0 Gm10116  |



|          |              |       |       |             |            |
|----------|--------------|-------|-------|-------------|------------|
| 2.04E-14 | -0.58133009  | 0.366 | 0.459 | 2.68E-10    | 0 Naca     |
| 2.65E-14 | -0.402898136 | 0.643 | 0.668 | 3.50E-10    | 0 Cox4i1   |
| 2.86E-14 | 0.268030963  | 0.552 | 0.362 | 3.78E-10    | 0 Lbr      |
| 2.91E-14 | -0.544813849 | 0.391 | 0.491 | 3.83E-10    | 0 Uqcrh    |
| 4.16E-14 | -0.665269011 | 0.215 | 0.346 | 5.49E-10    | 0 Pomp     |
| 9.90E-14 | -0.630968937 | 0.206 | 0.337 | 1.31E-09    | 0 Eif3f    |
| 1.13E-13 | -0.611989288 | 0.249 | 0.367 | 1.50E-09    | 0 Snrpf    |
| 2.40E-13 | -0.635906565 | 0.204 | 0.325 | 3.17E-09    | 0 Atp5g1   |
| 2.43E-13 | -0.377945581 | 0.627 | 0.657 | 3.21E-09    | 0 mt-Co2   |
| 1.03E-12 | 0.263689482  | 0.282 | 0.155 | 1.36E-08    | 0 Cited2   |
| 1.12E-12 | 0.278298929  | 0.371 | 0.228 | 1.48E-08    | 0 Rnaseh2c |
| 1.79E-12 | -0.74825426  | 0.373 | 0.445 | 2.36E-08    | 0 Lgals3   |
| 2.04E-12 | -0.641842382 | 0.172 | 0.295 | 2.69E-08    | 0 Nsa2     |
| 2.54E-12 | -0.605447934 | 0.217 | 0.334 | 3.35E-08    | 0 Slc25a5  |
| 2.55E-12 | -0.610977998 | 0.234 | 0.351 | 3.36E-08    | 0 Hsp90b1  |
| 2.57E-12 | -1.166907732 | 0.167 | 0.28  | 3.39E-08    | 0 Mpo      |
| 3.18E-12 | -0.493806101 | 0.648 | 0.636 | 4.19E-08    | 0 Xist     |
| 3.64E-11 | -0.551648671 | 0.368 | 0.433 | 4.80E-07    | 0 Serbp1   |
| 4.34E-11 | -0.582483692 | 0.325 | 0.411 | 5.72E-07    | 0 Dbi      |
| 5.90E-11 | -0.555865922 | 0.316 | 0.404 | 7.78E-07    | 0 mt-Atp8  |
| 9.36E-11 | -0.473353047 | 0.503 | 0.539 | 1.23E-06    | 0 Mrpl33   |
| 1.95E-10 | -0.366029742 | 0.597 | 0.603 | 2.57E-06    | 0 Atp5e    |
| 4.46E-10 | -0.341333685 | 0.947 | 0.832 | 5.88E-06    | 0 Ptma     |
| 4.65E-10 | -0.315459892 | 0.728 | 0.694 | 6.13E-06    | 0 Oaz1     |
| 1.20E-09 | -0.564841002 | 0.194 | 0.293 | 1.58E-05    | 0 Cmtm7    |
| 2.72E-09 | -0.429171922 | 0.417 | 0.484 | 3.59E-05    | 0 Morf4l1  |
| 4.61E-09 | -0.541538322 | 0.295 | 0.38  | 6.09E-05    | 0 Srrm2    |
| 6.16E-09 | -0.522572848 | 0.218 | 0.31  | 8.13E-05    | 0 Erh      |
| 8.22E-09 | -0.512365976 | 0.245 | 0.335 | 0.000108429 | 0 Ndufa7   |
| 1.30E-08 | -0.624752002 | 0.258 | 0.34  | 0.000171466 | 0 Notch2   |
| 2.30E-08 | -0.530039896 | 0.208 | 0.299 | 0.000303211 | 0 Rsrp1    |

|          |              |       |       |             |                 |
|----------|--------------|-------|-------|-------------|-----------------|
| 3.10E-08 | -0.476810147 | 0.274 | 0.356 | 0.000408597 | 0 Cox7b         |
| 3.14E-08 | -0.493411683 | 0.169 | 0.262 | 0.000414501 | 0 Eif3a         |
| 6.20E-08 | -0.484208014 | 0.252 | 0.332 | 0.000818467 | 0 Ranbp1        |
| 8.80E-08 | -0.431707012 | 0.423 | 0.454 | 0.001160965 | 0 Uqcr11        |
| 1.43E-07 | -0.45706238  | 0.229 | 0.315 | 0.00188504  | 0 Canx          |
| 1.49E-07 | -0.516508589 | 0.185 | 0.271 | 0.001961172 | 0 Prrc2c        |
| 1.59E-07 | -0.547165258 | 0.185 | 0.265 | 0.002096297 | 0 Ucp2          |
| 1.60E-07 | -0.562364677 | 0.226 | 0.3   | 0.002109829 | 0 Laptm5        |
| 2.48E-07 | -0.385720776 | 0.526 | 0.519 | 0.003277106 | 0 Snrpg         |
| 3.25E-07 | -0.466440757 | 0.242 | 0.321 | 0.004287562 | 0 Eif3k         |
| 3.51E-07 | -0.451077992 | 0.384 | 0.436 | 0.004633336 | 0 Serinc3       |
| 3.54E-07 | -0.909344778 | 0.21  | 0.279 | 0.004666497 | 0 Prtn3         |
| 7.51E-07 | -0.457708116 | 0.206 | 0.284 | 0.009907016 | 0 Bola2         |
| 7.59E-07 | -0.444895012 | 0.362 | 0.416 | 0.01001222  | 0 Atox1         |
| 1.10E-06 | -0.452347787 | 0.229 | 0.305 | 0.014554505 | 0 Atp5g2        |
| 1.17E-06 | -0.478749219 | 0.206 | 0.283 | 0.015442735 | 0 Arglu1        |
| 2.33E-06 | -0.473143534 | 0.297 | 0.353 | 0.030727695 | 0 Ptpn18        |
| 2.62E-06 | -0.440661407 | 0.21  | 0.285 | 0.034614381 | 0 mt-Nd4l       |
| 3.36E-06 | -0.441505947 | 0.222 | 0.292 | 0.04433874  | 0 Eif4a1        |
| 6.06E-06 | -0.393474743 | 0.341 | 0.39  | 0.079978938 | 0 Tmem258       |
| 6.23E-06 | -0.404895759 | 0.185 | 0.259 | 0.082118702 | 0 Timm13        |
| 7.72E-06 | -0.389912861 | 0.242 | 0.311 | 0.101855003 | 0 Hnrnpm        |
| 7.89E-06 | -0.435323082 | 0.698 | 0.606 | 0.104037056 | 0 Ly6c2         |
| 8.42E-06 | -0.460887113 | 0.284 | 0.346 | 0.111021442 | 0 Ifitm2        |
| 2.56E-05 | -0.351918762 | 0.387 | 0.415 | 0.337906194 | 0 2010107E04Rik |
| 2.57E-05 | -0.510314839 | 0.201 | 0.26  | 0.338422151 | 0 Btg1          |
| 2.88E-05 | -0.385078614 | 0.313 | 0.367 | 0.380536121 | 0 BC005537      |
| 3.22E-05 | -0.379056545 | 0.366 | 0.394 | 0.425020977 | 0 Gm8186        |
| 3.66E-05 | -1.136902331 | 0.199 | 0.252 | 0.482164497 | 0 Elane         |
| 6.13E-05 | -0.444411842 | 0.325 | 0.367 | 0.808944344 | 0 Serp1         |
| 7.34E-05 | -0.392442562 | 0.194 | 0.254 | 0.967562085 | 0 Rbm25         |

|            |              |       |       |   |            |
|------------|--------------|-------|-------|---|------------|
| 8.20E-05   | -0.397590004 | 0.25  | 0.305 | 1 | 0 Ost4     |
| 8.90E-05   | -0.320893277 | 0.462 | 0.476 | 1 | 0 H2afj    |
| 8.96E-05   | -0.335477812 | 0.371 | 0.408 | 1 | 0 Ndufa13  |
| 9.10E-05   | -0.356352788 | 0.377 | 0.409 | 1 | 0 Uqcrq    |
| 0.00010146 | -0.36816904  | 0.265 | 0.317 | 1 | 0 Cycs     |
| 0.00014146 | -0.309403633 | 0.444 | 0.452 | 1 | 0 Usmg5    |
| 0.00015996 | -0.364248887 | 0.236 | 0.292 | 1 | 0 Clta     |
| 0.00019091 | -0.307345061 | 0.38  | 0.411 | 1 | 0 Rbm39    |
| 0.00024535 | -0.349795748 | 0.419 | 0.427 | 1 | 0 Hint1    |
| 0.00033116 | -0.449945475 | 0.217 | 0.26  | 1 | 0 Anxa2    |
| 0.00057609 | -0.262073217 | 0.627 | 0.568 | 1 | 0 Cox8a    |
| 0.00065431 | -0.394727682 | 0.249 | 0.291 | 1 | 0 Psmb1    |
| 0.00069087 | -0.35204683  | 0.282 | 0.322 | 1 | 0 Nedd8    |
| 0.00071197 | -0.340599366 | 0.336 | 0.367 | 1 | 0 Son      |
| 0.00088077 | -0.266070929 | 0.202 | 0.256 | 1 | 0 Ndufb2   |
| 0.00093308 | -0.325611904 | 0.217 | 0.268 | 1 | 0 Gnas     |
| 0.00098654 | -0.385039718 | 0.217 | 0.26  | 1 | 0 Atp5c1   |
| 0.00136556 | -0.431997867 | 0.291 | 0.318 | 1 | 0 Ptprc    |
| 0.00140308 | -0.327912823 | 0.375 | 0.394 | 1 | 0 Ywhaz    |
| 0.00147321 | -0.286206598 | 0.417 | 0.429 | 1 | 0 Hnrnpk   |
| 0.00178138 | -0.31781962  | 0.387 | 0.405 | 1 | 0 Pfdn5    |
| 0.00185756 | -0.328678288 | 0.206 | 0.252 | 1 | 0 Eif3h    |
| 0.00192123 | -0.322446616 | 0.222 | 0.266 | 1 | 0 Snrpd2   |
| 0.00211427 | -0.339307451 | 0.474 | 0.448 | 1 | 0 Atpif1   |
| 0.00215867 | -0.28187171  | 0.407 | 0.413 | 1 | 0 Chchd2   |
| 0.00262638 | -0.261452182 | 0.561 | 0.516 | 1 | 0 Atp5j2   |
| 0.0027267  | -0.363451469 | 0.334 | 0.358 | 1 | 0 Gm42418  |
| 0.0033252  | -0.261695934 | 0.805 | 0.706 | 1 | 0 Fcer1g   |
| 0.00351476 | -0.294847543 | 0.321 | 0.352 | 1 | 0 Ndufa6   |
| 0.00363377 | -0.290297356 | 0.3   | 0.328 | 1 | 0 Hsp90aa1 |
| 0.00589287 | -0.25379605  | 0.258 | 0.297 | 1 | 0 Nap1l1   |

|            |              |       |       |           |            |                   |
|------------|--------------|-------|-------|-----------|------------|-------------------|
| 0.00623433 | -0.288252525 | 0.233 | 0.267 | 1         | 0 Snrpb    | <b>Neutrophil</b> |
| 0          | 2.07072349   | 0.597 | 0.072 | 0         | 1 Mmp9     |                   |
| 2.48E-291  | 2.23548758   | 0.588 | 0.078 | 3.27E-287 | 1 Mmp8     |                   |
| 1.36E-235  | 1.529574687  | 0.977 | 0.503 | 1.79E-231 | 1 Ltf      |                   |
| 6.44E-220  | 1.54976457   | 0.872 | 0.315 | 8.50E-216 | 1 Ifitm6   |                   |
| 1.52E-215  | 1.351701596  | 0.998 | 0.598 | 2.01E-211 | 1 Wfdc21   |                   |
| 3.96E-215  | 1.359220115  | 0.992 | 0.52  | 5.23E-211 | 1 Lcn2     |                   |
| 5.99E-211  | 1.25622012   | 1     | 0.994 | 7.91E-207 | 1 S100a9   |                   |
| 2.76E-207  | -1.8732797   | 0.515 | 0.935 | 3.65E-203 | 1 Rps28    |                   |
| 8.83E-206  | -1.287443647 | 0.84  | 0.988 | 1.17E-201 | 1 Rps29    |                   |
| 3.27E-198  | -2.061092352 | 0.366 | 0.902 | 4.31E-194 | 1 Rpl35    |                   |
| 6.67E-197  | -1.488448819 | 0.746 | 0.974 | 8.80E-193 | 1 Rpl41    |                   |
| 5.22E-192  | 1.204579335  | 1     | 0.999 | 6.89E-188 | 1 S100a8   |                   |
| 5.43E-186  | 1.287808841  | 0.929 | 0.405 | 7.16E-182 | 1 Pglyrp1  |                   |
| 1.37E-169  | -1.736785955 | 0.368 | 0.877 | 1.81E-165 | 1 Rps18    |                   |
| 3.54E-168  | -1.456812326 | 0.573 | 0.925 | 4.67E-164 | 1 Rps19    |                   |
| 5.14E-166  | -1.69084374  | 0.391 | 0.882 | 6.78E-162 | 1 Ptma     |                   |
| 1.26E-163  | -1.621906524 | 0.42  | 0.889 | 1.66E-159 | 1 Rpl13    |                   |
| 1.38E-159  | 1.118696926  | 0.998 | 0.836 | 1.82E-155 | 1 Ngp      |                   |
| 1.58E-158  | -1.436534371 | 0.506 | 0.907 | 2.08E-154 | 1 Rpl18a   |                   |
| 6.14E-157  | 1.433583055  | 0.382 | 0.056 | 8.09E-153 | 1 Fpr2     |                   |
| 1.84E-152  | -1.569016691 | 0.408 | 0.874 | 2.42E-148 | 1 Rps8     |                   |
| 5.80E-152  | -1.155617104 | 0.719 | 0.958 | 7.65E-148 | 1 Rpl37a   |                   |
| 4.26E-151  | -1.437268131 | 0.51  | 0.899 | 5.62E-147 | 1 Rpl32    |                   |
| 4.62E-150  | 1.275878873  | 0.828 | 0.394 | 6.09E-146 | 1 Anxa1    |                   |
| 2.69E-147  | -1.672620181 | 0.292 | 0.819 | 3.55E-143 | 1 Rpl39    |                   |
| 8.98E-142  | 1.482306354  | 0.389 | 0.067 | 1.18E-137 | 1 AA467197 |                   |
| 6.53E-141  | -0.96352817  | 0.786 | 0.969 | 8.62E-137 | 1 mt-Co3   |                   |
| 4.38E-140  | -1.329799356 | 0.464 | 0.883 | 5.78E-136 | 1 Rpl38    |                   |
| 6.83E-139  | -0.987197512 | 0.83  | 0.968 | 9.01E-135 | 1 Rps27    |                   |
| 5.80E-138  | 1.199861261  | 0.887 | 0.555 | 7.65E-134 | 1 S100a11  |                   |

|           |              |       |       |           |           |
|-----------|--------------|-------|-------|-----------|-----------|
| 7.48E-138 | 2.424450446  | 0.798 | 0.448 | 9.87E-134 | 1 Retnlg  |
| 4.12E-135 | -1.919109487 | 0.141 | 0.722 | 5.43E-131 | 1 Gm2000  |
| 1.11E-134 | -1.208113172 | 0.574 | 0.909 | 1.47E-130 | 1 Rps14   |
| 4.68E-134 | 1.507160683  | 0.382 | 0.068 | 6.17E-130 | 1 Ly6g    |
| 2.05E-132 | -1.416231146 | 0.359 | 0.833 | 2.71E-128 | 1 Rps11   |
| 7.07E-130 | -1.461708466 | 0.338 | 0.824 | 9.32E-126 | 1 Rps5    |
| 2.32E-128 | -1.61798476  | 0.24  | 0.767 | 3.06E-124 | 1 Rps26   |
| 6.17E-128 | -1.092583877 | 0.548 | 0.901 | 8.14E-124 | 1 Rpl35a  |
| 7.72E-128 | -1.126490559 | 0.641 | 0.925 | 1.02E-123 | 1 Rpl37   |
| 1.22E-126 | -1.186916175 | 0.504 | 0.891 | 1.61E-122 | 1 mt-Atp6 |
| 1.39E-126 | -1.51846541  | 0.323 | 0.805 | 1.83E-122 | 1 Rpl36   |
| 1.92E-125 | -1.308387523 | 0.363 | 0.83  | 2.53E-121 | 1 Ppia    |
| 2.99E-124 | -1.33942043  | 0.435 | 0.844 | 3.94E-120 | 1 Rps23   |
| 2.26E-123 | -1.273923604 | 0.408 | 0.843 | 2.98E-119 | 1 Rps16   |
| 1.20E-122 | -1.768354848 | 0.128 | 0.692 | 1.58E-118 | 1 Gm10263 |
| 2.21E-122 | 0.933164587  | 0.998 | 0.925 | 2.92E-118 | 1 Camp    |
| 3.62E-121 | -1.357161091 | 0.363 | 0.815 | 4.77E-117 | 1 Rplp2   |
| 1.08E-119 | -1.510700752 | 0.263 | 0.762 | 1.43E-115 | 1 Rpl6    |
| 6.58E-119 | -1.541078469 | 0.277 | 0.762 | 8.67E-115 | 1 Rplp1   |
| 6.63E-117 | -1.525146195 | 0.258 | 0.751 | 8.74E-113 | 1 Rplp0   |
| 8.90E-117 | -1.398457418 | 0.336 | 0.79  | 1.17E-112 | 1 Gm10076 |
| 2.62E-115 | -1.283546358 | 0.365 | 0.817 | 3.46E-111 | 1 Rpl26   |
| 3.96E-114 | -0.70903492  | 0.91  | 0.985 | 5.23E-110 | 1 mt-Co1  |
| 1.87E-112 | -1.175725008 | 0.443 | 0.837 | 2.46E-108 | 1 Rps24   |
| 7.42E-112 | -1.218484013 | 0.443 | 0.841 | 9.78E-108 | 1 Rpl13a  |
| 2.57E-111 | -1.406079301 | 0.284 | 0.76  | 3.39E-107 | 1 Rps17   |
| 5.80E-111 | -1.488596754 | 0.235 | 0.736 | 7.65E-107 | 1 Rpl10   |
| 1.21E-109 | -1.139257401 | 0.479 | 0.849 | 1.60E-105 | 1 Rpl23a  |
| 2.03E-109 | -1.697156497 | 0.177 | 0.685 | 2.68E-105 | 1 Rpl36a  |
| 2.05E-109 | -1.389398251 | 0.296 | 0.763 | 2.71E-105 | 1 Rps4x   |
| 1.44E-107 | -1.354565336 | 0.254 | 0.75  | 1.89E-103 | 1 Rpl28   |

|           |              |       |       |           |              |
|-----------|--------------|-------|-------|-----------|--------------|
| 9.31E-107 | -1.278275304 | 0.33  | 0.781 | 1.23E-102 | 1 Rpl24      |
| 1.23E-106 | -1.449098206 | 0.233 | 0.731 | 1.62E-102 | 1 Hmgb1      |
| 2.32E-106 | -1.291465266 | 0.328 | 0.784 | 3.06E-102 | 1 Rps6       |
| 3.79E-106 | -1.238713172 | 0.368 | 0.798 | 5.00E-102 | 1 Rpl17      |
| 3.80E-105 | -1.21747622  | 0.397 | 0.806 | 5.01E-101 | 1 Rps3a1     |
| 7.46E-105 | -1.102589783 | 0.468 | 0.835 | 9.84E-101 | 1 Rpl34      |
| 1.16E-104 | -1.184033907 | 0.378 | 0.803 | 1.53E-100 | 1 Rpl21      |
| 5.38E-104 | -1.190768412 | 0.351 | 0.797 | 7.10E-100 | 1 Rps3       |
| 7.50E-104 | -1.38998503  | 0.231 | 0.724 | 9.89E-100 | 1 Rpsa       |
| 9.11E-104 | -1.477688874 | 0.246 | 0.725 | 1.20E-99  | 1 Rpl14      |
| 2.11E-103 | -1.308022205 | 0.3   | 0.754 | 2.78E-99  | 1 Rpl11      |
| 3.97E-103 | 1.171276405  | 0.552 | 0.183 | 5.24E-99  | 1 Cd177      |
| 1.76E-100 | -1.024848314 | 0.536 | 0.871 | 2.33E-96  | 1 Rps27rt    |
| 7.87E-99  | -1.59406144  | 0.137 | 0.641 | 1.04E-94  | 1 Rpl3       |
| 1.72E-98  | -1.20705455  | 0.345 | 0.776 | 2.26E-94  | 1 Rpl23      |
| 4.21E-98  | -1.878080112 | 0.357 | 0.774 | 5.55E-94  | 1 Tmsb10     |
| 7.84E-98  | -1.333261191 | 0.267 | 0.729 | 1.03E-93  | 1 Rps7       |
| 8.72E-98  | -1.392130643 | 0.229 | 0.701 | 1.15E-93  | 1 Rps20      |
| 1.10E-97  | -1.186764448 | 0.363 | 0.783 | 1.45E-93  | 1 Rps15a     |
| 2.93E-95  | -1.193376881 | 0.317 | 0.758 | 3.87E-91  | 1 Rpl19      |
| 7.24E-94  | -1.395553138 | 0.24  | 0.696 | 9.54E-90  | 1 Rps12      |
| 1.55E-93  | -1.345125154 | 0.225 | 0.698 | 2.04E-89  | 1 Eef1a1     |
| 6.09E-93  | -1.1153467   | 0.37  | 0.778 | 8.03E-89  | 1 Rps15      |
| 1.46E-91  | -1.175722218 | 0.338 | 0.755 | 1.92E-87  | 1 Rpl27a     |
| 7.18E-90  | -1.126308517 | 0.336 | 0.762 | 9.48E-86  | 1 Rps25      |
| 1.31E-86  | -1.460845148 | 0.151 | 0.617 | 1.73E-82  | 1 Rpl15      |
| 2.66E-84  | -1.26181106  | 0.221 | 0.667 | 3.51E-80  | 1 Uba52      |
| 3.86E-84  | -0.805279254 | 0.674 | 0.895 | 5.09E-80  | 1 Rps27a     |
| 2.70E-82  | -1.161392245 | 0.277 | 0.706 | 3.57E-78  | 1 Rpl23a-ps3 |
| 4.87E-82  | -1.699060263 | 0.05  | 0.507 | 6.43E-78  | 1 Rps18-ps3  |
| 1.32E-81  | -1.107209797 | 0.332 | 0.742 | 1.75E-77  | 1 Rpl31      |

|          |              |       |       |          |             |
|----------|--------------|-------|-------|----------|-------------|
| 1.83E-80 | -1.498593497 | 0.143 | 0.591 | 2.42E-76 | 1 Rps2      |
| 2.19E-79 | -1.231001067 | 0.202 | 0.647 | 2.89E-75 | 1 Gm11808   |
| 2.69E-79 | -1.191080345 | 0.258 | 0.678 | 3.55E-75 | 1 Rpl18     |
| 3.69E-79 | -1.272334543 | 0.179 | 0.627 | 4.87E-75 | 1 Wdr89     |
| 1.39E-78 | -1.878557852 | 0.267 | 0.67  | 1.83E-74 | 1 Crip1     |
| 4.29E-78 | -1.346317811 | 0.172 | 0.612 | 5.66E-74 | 1 Rpl10a    |
| 1.62E-77 | -1.414842012 | 0.109 | 0.556 | 2.13E-73 | 1 Snrpg     |
| 6.44E-77 | -1.06585072  | 0.303 | 0.713 | 8.50E-73 | 1 Rpl27     |
| 7.64E-77 | -1.589376973 | 0.074 | 0.511 | 1.01E-72 | 1 Rps26-ps1 |
| 8.12E-77 | 0.694402921  | 0.918 | 0.714 | 1.07E-72 | 1 Cd52      |
| 1.07E-76 | -1.072491887 | 0.344 | 0.736 | 1.42E-72 | 1 mt-Cytb   |
| 1.08E-76 | -1.148221953 | 0.246 | 0.683 | 1.42E-72 | 1 Rpl8      |
| 1.56E-76 | -1.065462744 | 0.324 | 0.724 | 2.06E-72 | 1 Rps13     |
| 3.10E-74 | -1.544225785 | 0.073 | 0.505 | 4.10E-70 | 1 Gm8730    |
| 4.04E-74 | -1.249756083 | 0.33  | 0.715 | 5.33E-70 | 1 Plac8     |
| 2.77E-72 | 0.730316818  | 0.857 | 0.626 | 3.65E-68 | 1 Prdx5     |
| 5.61E-72 | -1.214001403 | 0.183 | 0.608 | 7.39E-68 | 1 Rpl36a1   |
| 8.77E-72 | -1.316091538 | 0.128 | 0.561 | 1.16E-67 | 1 Rpl22     |
| 1.35E-71 | -1.501727713 | 0.097 | 0.518 | 1.78E-67 | 1 Rpl12     |
| 3.87E-71 | -1.161454537 | 0.242 | 0.653 | 5.11E-67 | 1 mt-Nd1    |
| 1.00E-70 | -1.47183182  | 0.074 | 0.502 | 1.32E-66 | 1 Rpl10-ps3 |
| 2.59E-69 | -1.160687603 | 0.212 | 0.624 | 3.41E-65 | 1 Rpl4      |
| 3.24E-68 | -1.100630165 | 0.26  | 0.67  | 4.27E-64 | 1 Xist      |
| 5.01E-68 | -1.475212944 | 0.057 | 0.468 | 6.60E-64 | 1 Rpl13-ps3 |
| 2.07E-67 | -0.873228779 | 0.42  | 0.774 | 2.73E-63 | 1 Rpl9      |
| 2.67E-67 | -1.491200081 | 0.067 | 0.473 | 3.52E-63 | 1 Gm10073   |
| 4.16E-66 | -1.41591571  | 0.126 | 0.53  | 5.49E-62 | 1 Tubb5     |
| 5.00E-66 | -0.926088045 | 0.351 | 0.739 | 6.59E-62 | 1 Tpt1      |
| 4.80E-64 | -0.95040535  | 0.303 | 0.689 | 6.33E-60 | 1 Rps10     |
| 3.39E-63 | -1.053720481 | 0.252 | 0.639 | 4.48E-59 | 1 Rps21     |
| 4.23E-63 | -1.594927492 | 0.124 | 0.509 | 5.58E-59 | 1 Lgals1    |

|          |              |       |       |          |             |
|----------|--------------|-------|-------|----------|-------------|
| 2.46E-62 | -1.336509281 | 0.074 | 0.471 | 3.24E-58 | 1 Gnb2l1    |
| 4.25E-62 | -1.279515087 | 0.151 | 0.54  | 5.60E-58 | 1 Cbx3      |
| 5.82E-62 | -1.388144579 | 0.109 | 0.501 | 7.68E-58 | 1 Ly6e      |
| 1.01E-61 | -1.062432399 | 0.202 | 0.603 | 1.33E-57 | 1 mt-Nd4    |
| 1.45E-61 | -1.343241371 | 0.103 | 0.489 | 1.92E-57 | 1 Rps12-ps3 |
| 2.83E-61 | 1.10437645   | 0.307 | 0.088 | 3.73E-57 | 1 Cd33      |
| 1.66E-60 | -0.574590969 | 0.775 | 0.932 | 2.19E-56 | 1 Fau       |
| 4.34E-59 | 1.075746401  | 0.292 | 0.083 | 5.73E-55 | 1 Lrg1      |
| 6.72E-59 | -1.305060294 | 0.084 | 0.465 | 8.87E-55 | 1 Gm9493    |
| 7.56E-59 | -1.186952867 | 0.151 | 0.536 | 9.97E-55 | 1 Rpl22l1   |
| 1.27E-57 | -1.32511002  | 0.052 | 0.422 | 1.67E-53 | 1 Gm8186    |
| 1.64E-57 | -0.64471676  | 0.679 | 0.89  | 2.16E-53 | 1 Rps9      |
| 1.14E-55 | -1.135575569 | 0.134 | 0.508 | 1.51E-51 | 1 Rps27l    |
| 2.83E-55 | -1.153257028 | 0.132 | 0.5   | 3.74E-51 | 1 Rpl29     |
| 5.77E-55 | -1.940931654 | 0.063 | 0.414 | 7.61E-51 | 1 Hist1h2ap |
| 1.22E-54 | 0.313926891  | 1     | 0.995 | 1.61E-50 | 1 Tmsb4x    |
| 6.72E-53 | 0.992154742  | 0.408 | 0.166 | 8.86E-49 | 1 Adpgk     |
| 1.12E-52 | -0.938572442 | 0.208 | 0.577 | 1.47E-48 | 1 Rpl7      |
| 2.58E-52 | -0.839803739 | 0.328 | 0.683 | 3.41E-48 | 1 mt-Co2    |
| 2.88E-51 | -1.290679369 | 0.046 | 0.385 | 3.80E-47 | 1 Snrpf     |
| 1.45E-50 | -1.048287949 | 0.319 | 0.66  | 1.92E-46 | 1 Cst3      |
| 1.90E-50 | 0.944043473  | 0.481 | 0.23  | 2.50E-46 | 1 Tmcc1     |
| 2.23E-50 | -1.21017423  | 0.088 | 0.431 | 2.95E-46 | 1 Rpl36-ps3 |
| 2.56E-50 | -0.831737039 | 0.319 | 0.666 | 3.38E-46 | 1 Sec61g    |
| 5.80E-50 | -1.275026891 | 0.071 | 0.411 | 7.65E-46 | 1 Npm1      |
| 1.22E-49 | -1.070885855 | 0.103 | 0.455 | 1.60E-45 | 1 Hint1     |
| 1.42E-49 | -1.009676508 | 0.145 | 0.504 | 1.87E-45 | 1 Rpl27-ps3 |
| 1.34E-48 | 0.325835161  | 0.998 | 0.898 | 1.77E-44 | 1 Lyz2      |
| 1.95E-48 | -1.095365083 | 0.107 | 0.457 | 2.57E-44 | 1 Prdx1     |
| 2.31E-48 | 0.762433325  | 0.662 | 0.436 | 3.05E-44 | 1 Hp        |
| 5.09E-48 | -0.616981832 | 0.628 | 0.837 | 6.71E-44 | 1 H2afz     |



|          |              |       |       |          |             |
|----------|--------------|-------|-------|----------|-------------|
| 8.13E-48 | -1.217289196 | 0.067 | 0.394 | 1.07E-43 | 1 Dek       |
| 1.43E-47 | -0.645213553 | 0.531 | 0.814 | 1.89E-43 | 1 Gm9843    |
| 2.88E-47 | -1.121940626 | 0.109 | 0.446 | 3.79E-43 | 1 Hsp90ab1  |
| 5.67E-47 | -0.946276342 | 0.179 | 0.528 | 7.49E-43 | 1 Rpl7a     |
| 8.67E-47 | -1.175641317 | 0.055 | 0.377 | 1.14E-42 | 1 Rpl6l     |
| 1.46E-46 | -0.900516849 | 0.227 | 0.573 | 1.93E-42 | 1 Hspa8     |
| 1.51E-46 | 0.698664769  | 0.718 | 0.482 | 1.99E-42 | 1 Cybb      |
| 1.57E-44 | -0.956503663 | 0.137 | 0.479 | 2.08E-40 | 1 Naca      |
| 2.92E-44 | -1.152902125 | 0.078 | 0.393 | 3.85E-40 | 1 Tuba1b    |
| 6.72E-44 | 1.074283464  | 0.479 | 0.261 | 8.87E-40 | 1 Slpi      |
| 7.12E-44 | -0.98674943  | 0.122 | 0.454 | 9.39E-40 | 1 Serbp1    |
| 7.14E-44 | 0.876947591  | 0.418 | 0.192 | 9.42E-40 | 1 Mcemp1    |
| 7.62E-44 | -1.19832253  | 0.057 | 0.367 | 1.01E-39 | 1 Set       |
| 8.84E-44 | -0.936278639 | 0.143 | 0.475 | 1.17E-39 | 1 Rpl9-ps6  |
| 1.42E-43 | 0.8746443    | 0.313 | 0.115 | 1.87E-39 | 1 Syne1     |
| 3.71E-43 | -0.970098578 | 0.128 | 0.458 | 4.89E-39 | 1 Rpl5      |
| 4.06E-43 | -1.164343843 | 0.048 | 0.346 | 5.36E-39 | 1 Gm10036   |
| 9.89E-43 | -0.966873214 | 0.135 | 0.46  | 1.30E-38 | 1 Ybx1      |
| 2.62E-42 | -1.158799581 | 0.057 | 0.36  | 3.45E-38 | 1 Hnrnpa1   |
| 1.12E-41 | -1.172755646 | 0.023 | 0.307 | 1.47E-37 | 1 Gm10269   |
| 1.41E-41 | -0.987106551 | 0.155 | 0.475 | 1.86E-37 | 1 Psm7      |
| 3.72E-41 | -0.684056311 | 0.445 | 0.729 | 4.90E-37 | 1 Sub1      |
| 2.86E-40 | -1.336921419 | 0.053 | 0.34  | 3.77E-36 | 1 Ms4a6c    |
| 3.03E-40 | -0.962955867 | 0.109 | 0.422 | 3.99E-36 | 1 mt-Atp8   |
| 3.55E-40 | 0.878913228  | 0.462 | 0.246 | 4.68E-36 | 1 Ncf1      |
| 7.51E-40 | 0.476702007  | 0.798 | 0.531 | 9.91E-36 | 1 Chil3     |
| 1.34E-39 | -0.844736454 | 0.176 | 0.498 | 1.77E-35 | 1 Ndufa4    |
| 2.07E-39 | -0.74210643  | 0.277 | 0.594 | 2.73E-35 | 1 Hnrnpa2b1 |
| 2.91E-39 | 0.8855893    | 0.326 | 0.131 | 3.84E-35 | 1 Itgam     |
| 3.55E-39 | -0.770541092 | 0.26  | 0.587 | 4.68E-35 | 1 Calm2     |
| 9.53E-39 | -0.894019076 | 0.135 | 0.452 | 1.26E-34 | 1 Eef2      |

|          |              |       |       |          |                 |
|----------|--------------|-------|-------|----------|-----------------|
| 1.40E-38 | -1.005600921 | 0.135 | 0.438 | 1.84E-34 | 1 Stmn1         |
| 1.66E-38 | 0.905894855  | 0.338 | 0.143 | 2.20E-34 | 1 Cd9           |
| 1.94E-38 | -0.922114857 | 0.128 | 0.433 | 2.56E-34 | 1 Anp32b        |
| 3.25E-38 | -0.958711695 | 0.128 | 0.427 | 4.29E-34 | 1 Dbi           |
| 5.27E-38 | -0.840530196 | 0.162 | 0.476 | 6.95E-34 | 1 Hnrnpa3       |
| 1.24E-37 | -0.912627448 | 0.103 | 0.4   | 1.64E-33 | 1 H2afv         |
| 4.41E-37 | -1.012053738 | 0.052 | 0.329 | 5.81E-33 | 1 Polr2l        |
| 6.13E-37 | -1.033742725 | 0.082 | 0.369 | 8.09E-33 | 1 H2afy         |
| 7.93E-37 | -0.984294579 | 0.282 | 0.566 | 1.05E-32 | 1 Psap          |
| 2.10E-36 | -0.814905718 | 0.181 | 0.49  | 2.78E-32 | 1 Rpl30         |
| 4.05E-36 | -0.830195945 | 0.153 | 0.452 | 5.34E-32 | 1 Sumo2         |
| 4.68E-36 | -0.889941995 | 0.109 | 0.397 | 6.17E-32 | 1 Tmem256       |
| 1.02E-35 | -1.000486076 | 0.082 | 0.359 | 1.35E-31 | 1 Nop10         |
| 1.52E-35 | -1.012870771 | 0.067 | 0.336 | 2.01E-31 | 1 Atp5g1        |
| 2.83E-35 | -0.562535437 | 0.475 | 0.765 | 3.73E-31 | 1 H3f3b         |
| 3.61E-35 | -0.945992857 | 0.084 | 0.358 | 4.76E-31 | 1 Nucks1        |
| 4.60E-35 | 0.789938487  | 0.483 | 0.274 | 6.07E-31 | 1 Mgst1         |
| 4.93E-35 | -0.999357637 | 0.076 | 0.347 | 6.51E-31 | 1 Ranbp1        |
| 9.12E-35 | -0.878347845 | 0.126 | 0.408 | 1.20E-30 | 1 Eif2s2        |
| 1.02E-34 | -1.230447498 | 0.034 | 0.284 | 1.34E-30 | 1 S100a10       |
| 1.70E-34 | -1.014979449 | 0.061 | 0.325 | 2.24E-30 | 1 mt-Nd2        |
| 2.67E-34 | -1.056067705 | 0.076 | 0.34  | 3.52E-30 | 1 Top2a         |
| 5.26E-34 | -1.03247921  | 0.086 | 0.355 | 6.94E-30 | 1 2810417H13Rik |
| 1.10E-33 | -1.02146527  | 0.08  | 0.344 | 1.45E-29 | 1 Npc2          |
| 2.31E-33 | 0.889803182  | 0.286 | 0.117 | 3.05E-29 | 1 Vasp          |
| 3.25E-33 | 0.81134319   | 0.448 | 0.259 | 4.28E-29 | 1 Aldh2         |
| 3.25E-33 | 0.758683714  | 0.471 | 0.281 | 4.29E-29 | 1 Cd24a         |
| 5.68E-33 | -0.902782631 | 0.057 | 0.314 | 7.49E-29 | 1 Nap1l1        |
| 1.17E-32 | -0.942575216 | 0.071 | 0.326 | 1.54E-28 | 1 Tsix          |
| 1.28E-32 | -0.891961473 | 0.08  | 0.347 | 1.68E-28 | 1 Eif3f         |
| 1.38E-32 | -0.717610419 | 0.235 | 0.536 | 1.83E-28 | 1 Pabpc1        |

|          |              |       |       |          |            |
|----------|--------------|-------|-------|----------|------------|
| 3.00E-32 | -0.924313404 | 0.088 | 0.347 | 3.95E-28 | 1 Hsp90aa1 |
| 4.25E-32 | 0.802876259  | 0.406 | 0.213 | 5.60E-28 | 1 Cpne3    |
| 5.76E-32 | -1.16216444  | 0.038 | 0.277 | 7.60E-28 | 1 Gm9844   |
| 6.88E-32 | -0.800385213 | 0.115 | 0.388 | 9.08E-28 | 1 Ran      |
| 1.16E-31 | 0.496088584  | 0.781 | 0.655 | 1.53E-27 | 1 Arhgdib  |
| 1.48E-31 | 0.677771617  | 0.698 | 0.517 | 1.95E-27 | 1 S100a6   |
| 3.74E-31 | -1.114388934 | 0.027 | 0.254 | 4.93E-27 | 1 Zeb2     |
| 4.06E-31 | -0.796141572 | 0.198 | 0.473 | 5.36E-27 | 1 Atpif1   |
| 4.55E-31 | -0.813825154 | 0.13  | 0.398 | 6.01E-27 | 1 Btf3     |
| 4.98E-31 | -0.652108227 | 0.208 | 0.502 | 6.57E-27 | 1 Morf4l1  |
| 2.59E-30 | -0.515241554 | 0.525 | 0.764 | 3.41E-26 | 1 Gpx1     |
| 4.69E-30 | -0.551429763 | 0.412 | 0.688 | 6.19E-26 | 1 Cox4i1   |
| 1.10E-29 | -0.549571905 | 0.334 | 0.627 | 1.45E-25 | 1 Cox7c    |
| 1.26E-29 | -0.902266103 | 0.065 | 0.304 | 1.67E-25 | 1 Eef1g    |
| 3.24E-29 | -1.147597648 | 0.061 | 0.293 | 4.27E-25 | 1 Ccr2     |
| 7.03E-29 | 0.659742888  | 0.552 | 0.383 | 9.28E-25 | 1 Dstn     |
| 9.87E-29 | -0.752656204 | 0.086 | 0.337 | 1.30E-24 | 1 Snrpe    |
| 1.13E-28 | -0.859215929 | 0.067 | 0.304 | 1.49E-24 | 1 Nsa2     |
| 1.15E-28 | -0.517098902 | 0.473 | 0.716 | 1.52E-24 | 1 Oaz1     |
| 2.72E-28 | -0.791189122 | 0.092 | 0.338 | 3.59E-24 | 1 Eef1b2   |
| 3.01E-28 | -0.774027296 | 0.08  | 0.321 | 3.97E-24 | 1 Erh      |
| 3.69E-28 | -0.690261943 | 0.248 | 0.526 | 4.87E-24 | 1 Mbnl1    |
| 7.92E-28 | -0.773615664 | 0.09  | 0.332 | 1.04E-23 | 1 Cycs     |
| 8.99E-28 | -0.83783204  | 0.065 | 0.296 | 1.19E-23 | 1 Bola2    |
| 1.41E-27 | 0.792431888  | 0.332 | 0.168 | 1.85E-23 | 1 Ckap4    |
| 1.86E-27 | -0.997802824 | 0.084 | 0.313 | 2.45E-23 | 1 Pdcd4    |
| 3.05E-27 | -0.810717147 | 0.069 | 0.297 | 4.03E-23 | 1 mt-Nd4l  |
| 3.48E-27 | -0.752507367 | 0.103 | 0.344 | 4.60E-23 | 1 Slc25a5  |
| 4.00E-27 | -0.759677119 | 0.143 | 0.393 | 5.28E-23 | 1 Srrm2    |
| 4.76E-27 | -0.952608515 | 0.055 | 0.273 | 6.28E-23 | 1 Ncl      |
| 5.71E-27 | -0.799598598 | 0.073 | 0.3   | 7.53E-23 | 1 Hnrnpab  |

|          |              |       |       |          |           |
|----------|--------------|-------|-------|----------|-----------|
| 6.61E-27 | -0.728323159 | 0.109 | 0.351 | 8.71E-23 | 1 Lsm5    |
| 1.02E-26 | -0.646208388 | 0.181 | 0.454 | 1.35E-22 | 1 Serinc3 |
| 1.08E-26 | -0.726868499 | 0.101 | 0.34  | 1.42E-22 | 1 Hnrnpu  |
| 1.26E-26 | -0.645175959 | 0.185 | 0.449 | 1.66E-22 | 1 Rbm3    |
| 1.30E-26 | -0.767270362 | 0.09  | 0.324 | 1.72E-22 | 1 Hnrnpm  |
| 2.46E-26 | -0.785403963 | 0.059 | 0.281 | 3.25E-22 | 1 Snrpd2  |
| 2.61E-26 | -0.761349308 | 0.076 | 0.305 | 3.44E-22 | 1 Eif4a1  |
| 4.51E-26 | -0.721011728 | 0.118 | 0.357 | 5.95E-22 | 1 Srsf3   |
| 4.70E-26 | -0.698062508 | 0.147 | 0.398 | 6.20E-22 | 1 Eif5a   |
| 5.66E-26 | -0.792270211 | 0.082 | 0.305 | 7.47E-22 | 1 Tagln2  |
| 1.93E-25 | -1.327622492 | 0.08  | 0.29  | 2.54E-21 | 1 Prtn3   |
| 2.92E-25 | -0.811467546 | 0.046 | 0.251 | 3.85E-21 | 1 Usp50   |
| 3.85E-25 | -0.63824911  | 0.221 | 0.471 | 5.07E-21 | 1 Uqcr11  |
| 6.92E-25 | -0.642691924 | 0.143 | 0.393 | 9.13E-21 | 1 Srsf2   |
| 9.33E-25 | -0.734615133 | 0.067 | 0.282 | 1.23E-20 | 1 Snrpb   |
| 2.41E-24 | -0.751364431 | 0.065 | 0.273 | 3.19E-20 | 1 Alyref  |
| 2.58E-24 | -0.488712141 | 0.24  | 0.517 | 3.40E-20 | 1 Pcbp2   |
| 3.90E-24 | -0.767365788 | 0.053 | 0.256 | 5.14E-20 | 1 Cks1b   |
| 3.93E-24 | -0.773029867 | 0.069 | 0.28  | 5.18E-20 | 1 Prrc2c  |
| 4.44E-24 | -0.550469699 | 0.214 | 0.475 | 5.85E-20 | 1 Uqcr10  |
| 5.19E-24 | -0.738132257 | 0.084 | 0.302 | 6.85E-20 | 1 Tmpo    |
| 5.67E-24 | -0.553908965 | 0.281 | 0.542 | 7.48E-20 | 1 Atp5h   |
| 1.23E-23 | -0.772889931 | 0.057 | 0.26  | 1.62E-19 | 1 Calr    |
| 1.98E-23 | -0.553237964 | 0.21  | 0.463 | 2.61E-19 | 1 Hnrnpf  |
| 2.64E-23 | -0.529961453 | 0.271 | 0.528 | 3.48E-19 | 1 Sec61b  |
| 5.32E-23 | -0.73550213  | 0.149 | 0.376 | 7.02E-19 | 1 H2-K1   |
| 7.11E-23 | -0.702355926 | 0.101 | 0.316 | 9.38E-19 | 1 Atp5g2  |
| 1.23E-22 | -0.721072413 | 0.069 | 0.27  | 1.62E-18 | 1 Eif3a   |
| 3.14E-22 | -0.640959222 | 0.088 | 0.299 | 4.14E-18 | 1 Atp5b   |
| 3.52E-22 | -0.513729826 | 0.294 | 0.546 | 4.65E-18 | 1 Tma7    |
| 4.49E-22 | -0.590502086 | 0.181 | 0.417 | 5.93E-18 | 1 Tomm7   |

|          |              |       |       |          |            |
|----------|--------------|-------|-------|----------|------------|
| 9.30E-22 | -0.696602582 | 0.141 | 0.359 | 1.23E-17 | 1 Hsp90b1  |
| 9.48E-22 | 0.7242914    | 0.265 | 0.127 | 1.25E-17 | 1 Samd9l   |
| 1.08E-21 | -0.584316157 | 0.141 | 0.367 | 1.42E-17 | 1 Cox7b    |
| 1.08E-21 | -1.103403412 | 0.174 | 0.375 | 1.43E-17 | 1 Ifi27l2a |
| 1.18E-21 | -0.425558345 | 0.395 | 0.644 | 1.55E-17 | 1 Cox6c    |
| 1.33E-21 | -0.723067431 | 0.065 | 0.256 | 1.76E-17 | 1 Eif5b    |
| 1.81E-21 | -0.569604881 | 0.176 | 0.409 | 2.39E-17 | 1 Smdt1    |
| 1.98E-21 | -0.462260186 | 0.571 | 0.788 | 2.61E-17 | 1 B2m      |
| 2.87E-21 | -0.628856914 | 0.088 | 0.289 | 3.78E-17 | 1 Atp5o    |
| 3.55E-21 | -0.707375703 | 0.084 | 0.28  | 4.68E-17 | 1 Gnas     |
| 5.13E-21 | -0.482628261 | 0.231 | 0.48  | 6.77E-17 | 1 Ndufa2   |
| 5.74E-21 | -0.602417792 | 0.109 | 0.318 | 7.58E-17 | 1 Sfpq     |
| 5.80E-21 | -0.643833091 | 0.078 | 0.276 | 7.66E-17 | 1 Atp5g3   |
| 6.73E-21 | -0.531407668 | 0.263 | 0.502 | 8.88E-17 | 1 Uqcrh    |
| 7.65E-21 | -0.527292958 | 0.189 | 0.425 | 1.01E-16 | 1 Uqcrq    |
| 9.10E-21 | -0.655293915 | 0.073 | 0.263 | 1.20E-16 | 1 Eif3h    |
| 1.51E-20 | -0.60997739  | 0.097 | 0.299 | 2.00E-16 | 1 Tra2b    |
| 1.87E-20 | -0.583185267 | 0.092 | 0.293 | 2.47E-16 | 1 Arglu1   |
| 1.98E-20 | -0.537948699 | 0.156 | 0.383 | 2.62E-16 | 1 Son      |
| 2.03E-20 | -0.469194648 | 0.378 | 0.623 | 2.68E-16 | 1 Atp5e    |
| 2.55E-20 | -0.454513776 | 0.347 | 0.593 | 3.36E-16 | 1 Cox8a    |
| 2.72E-20 | -0.604260082 | 0.122 | 0.331 | 3.59E-16 | 1 Eif3k    |
| 2.87E-20 | 0.503992944  | 0.578 | 0.454 | 3.79E-16 | 1 Rac2     |
| 4.40E-20 | -0.632598384 | 0.067 | 0.251 | 5.81E-16 | 1 Dpm3     |
| 5.22E-20 | -1.569899236 | 0.084 | 0.261 | 6.89E-16 | 1 Elane    |
| 5.37E-20 | -0.464542221 | 0.296 | 0.54  | 7.08E-16 | 1 Atp5j2   |
| 5.38E-20 | -0.608503131 | 0.067 | 0.253 | 7.09E-16 | 1 Ptges3   |
| 7.36E-20 | 0.63000216   | 0.408 | 0.268 | 9.71E-16 | 1 Lcp1     |
| 1.08E-19 | -0.683890374 | 0.071 | 0.251 | 1.42E-15 | 1 Metap2   |
| 1.48E-19 | 0.390552241  | 0.771 | 0.703 | 1.95E-15 | 1 Myl6     |
| 1.52E-19 | -0.429580309 | 0.679 | 0.833 | 2.00E-15 | 1 Ftl1     |

|          |              |       |       |          |                 |
|----------|--------------|-------|-------|----------|-----------------|
| 2.49E-19 | -0.681220036 | 0.082 | 0.266 | 3.28E-15 | 1 Psmb8         |
| 5.41E-19 | -0.598476819 | 0.109 | 0.303 | 7.14E-15 | 1 Psmb1         |
| 6.32E-19 | -0.540982579 | 0.166 | 0.38  | 8.33E-15 | 1 BC005537      |
| 7.06E-19 | 0.650162978  | 0.311 | 0.176 | 9.31E-15 | 1 Hcst          |
| 9.15E-19 | -0.528856407 | 0.122 | 0.323 | 1.21E-14 | 1 Pcbp1         |
| 9.60E-19 | -0.577769163 | 0.088 | 0.272 | 1.27E-14 | 1 Lsm6          |
| 1.11E-18 | -0.56285112  | 0.095 | 0.284 | 1.46E-14 | 1 Tmed2         |
| 1.35E-18 | -0.587733841 | 0.099 | 0.288 | 1.78E-14 | 1 Ywhae         |
| 1.74E-18 | -0.47850807  | 0.219 | 0.446 | 2.30E-14 | 1 Hnrnpk        |
| 1.85E-18 | -0.584177232 | 0.073 | 0.252 | 2.44E-14 | 1 Park7         |
| 2.42E-18 | -0.626736816 | 0.076 | 0.254 | 3.19E-14 | 1 Pycard        |
| 3.24E-18 | -0.549859596 | 0.147 | 0.351 | 4.27E-14 | 1 Pomp          |
| 5.52E-18 | -0.487220083 | 0.206 | 0.426 | 7.28E-14 | 1 Rbm39         |
| 8.25E-18 | -0.513084008 | 0.447 | 0.66  | 1.09E-13 | 1 Fth1          |
| 1.64E-17 | -0.482708695 | 0.16  | 0.366 | 2.17E-13 | 1 Ndufa6        |
| 1.99E-17 | -0.586380066 | 0.094 | 0.27  | 2.62E-13 | 1 Atp5c1        |
| 3.46E-17 | -1.165415516 | 0.116 | 0.284 | 4.56E-13 | 1 Mpo           |
| 5.51E-17 | 0.287079314  | 0.876 | 0.832 | 7.26E-13 | 1 Pfn1          |
| 5.56E-17 | -0.539664108 | 0.115 | 0.299 | 7.34E-13 | 1 Cmtm7         |
| 6.18E-17 | -0.655930644 | 0.099 | 0.271 | 8.15E-13 | 1 Cebpb         |
| 7.05E-17 | -0.480143213 | 0.212 | 0.429 | 9.30E-13 | 1 Atox1         |
| 8.10E-17 | -0.406674553 | 0.344 | 0.569 | 1.07E-12 | 1 Cox6b1        |
| 8.16E-17 | -0.49074404  | 0.124 | 0.314 | 1.08E-12 | 1 Ndufc1        |
| 1.12E-16 | -0.489067726 | 0.156 | 0.351 | 1.48E-12 | 1 Cox5a         |
| 1.59E-16 | -0.453209117 | 0.195 | 0.399 | 2.10E-12 | 1 Minos1        |
| 2.02E-16 | -0.436876071 | 0.218 | 0.43  | 2.67E-12 | 1 2010107E04Rik |
| 5.64E-16 | -0.518082908 | 0.097 | 0.266 | 7.44E-12 | 1 Timm13        |
| 7.25E-16 | -0.570438259 | 0.118 | 0.291 | 9.56E-12 | 1 Reep5         |
| 1.21E-15 | 0.302754944  | 0.792 | 0.707 | 1.60E-11 | 1 Fcer1g        |
| 1.97E-15 | -0.397579493 | 0.269 | 0.486 | 2.60E-11 | 1 Cox5b         |
| 3.10E-15 | 0.51711868   | 0.515 | 0.416 | 4.09E-11 | 1 Tkt           |

|          |              |       |       |          |             |
|----------|--------------|-------|-------|----------|-------------|
| 3.85E-15 | -0.509058081 | 0.153 | 0.333 | 5.08E-11 | 1 Gm10116   |
| 5.81E-15 | 0.616644649  | 0.284 | 0.167 | 7.66E-11 | 1 Cnn2      |
| 1.06E-14 | 0.587857013  | 0.323 | 0.202 | 1.40E-10 | 1 Serpinb1a |
| 1.20E-14 | -0.460067651 | 0.101 | 0.265 | 1.58E-10 | 1 Ndufb10   |
| 1.24E-14 | -0.328766174 | 0.46  | 0.666 | 1.63E-10 | 1 Atp5l     |
| 1.43E-14 | -0.485864284 | 0.099 | 0.262 | 1.89E-10 | 1 Rbm25     |
| 1.70E-14 | -0.440866419 | 0.739 | 0.783 | 2.24E-10 | 1 Hmgb2     |
| 2.52E-14 | -0.434423878 | 0.141 | 0.318 | 3.33E-10 | 1 Uqcrb     |
| 2.98E-14 | -0.422420919 | 0.153 | 0.333 | 3.93E-10 | 1 Nedd8     |
| 3.47E-14 | -0.360161557 | 0.227 | 0.428 | 4.57E-10 | 1 Chchd2    |
| 4.10E-14 | -0.482124066 | 0.099 | 0.253 | 5.40E-10 | 1 Ube2s     |
| 4.53E-14 | -0.431422368 | 0.177 | 0.363 | 5.98E-10 | 1 Ptpn18    |
| 4.77E-14 | -0.43267945  | 0.187 | 0.373 | 6.29E-10 | 1 Arl6ip1   |
| 5.44E-14 | -0.410102769 | 0.128 | 0.301 | 7.17E-10 | 1 Clta      |
| 6.30E-14 | 0.584543233  | 0.256 | 0.147 | 8.32E-10 | 1 Degs1     |
| 7.18E-14 | -0.458829132 | 0.128 | 0.294 | 9.47E-10 | 1 Anapc13   |
| 1.12E-13 | 0.304804614  | 0.744 | 0.679 | 1.47E-09 | 1 Cyba      |
| 1.60E-13 | -0.430658943 | 0.109 | 0.264 | 2.11E-09 | 1 Ndufb2    |
| 1.93E-13 | -0.475043975 | 0.109 | 0.264 | 2.55E-09 | 1 Ndufb3    |
| 2.00E-13 | -0.35941447  | 0.319 | 0.531 | 2.64E-09 | 1 Cox6a1    |
| 2.45E-13 | -0.309268639 | 0.29  | 0.505 | 3.23E-09 | 1 Atp5j     |
| 2.60E-13 | -0.379402285 | 0.12  | 0.284 | 3.43E-09 | 1 Romo1     |
| 3.18E-13 | -0.414539082 | 0.141 | 0.306 | 4.20E-09 | 1 Sarnp     |
| 3.38E-13 | -0.380397555 | 0.162 | 0.341 | 4.46E-09 | 1 Ndufa7    |
| 3.43E-13 | -0.384474404 | 0.214 | 0.401 | 4.52E-09 | 1 Tmem258   |
| 4.75E-13 | 0.655183829  | 0.288 | 0.18  | 6.27E-09 | 1 Prr13     |
| 9.00E-13 | -0.410399254 | 0.135 | 0.297 | 1.19E-08 | 1 Luc7l2    |
| 9.00E-13 | -0.348002805 | 0.292 | 0.491 | 1.19E-08 | 1 H2afj     |
| 1.03E-12 | 0.513168749  | 0.366 | 0.257 | 1.35E-08 | 1 Clec4a2   |
| 1.67E-12 | -0.336781598 | 0.351 | 0.55  | 2.20E-08 | 1 Atp5k     |
| 2.29E-12 | -0.341715765 | 0.248 | 0.439 | 3.01E-08 | 1 Arpp19    |

|          |              |       |       |             |               |
|----------|--------------|-------|-------|-------------|---------------|
| 2.69E-12 | 0.644281201  | 0.273 | 0.173 | 3.55E-08    | 1 Gda         |
| 3.37E-12 | -0.342851755 | 0.195 | 0.374 | 4.44E-08    | 1 Gpx4        |
| 3.94E-12 | -0.425961791 | 0.12  | 0.268 | 5.20E-08    | 1 Ndufb8      |
| 4.07E-12 | -0.378679872 | 0.109 | 0.259 | 5.37E-08    | 1 Hnrnp1      |
| 4.20E-12 | 0.481927256  | 0.324 | 0.214 | 5.54E-08    | 1 Cd63        |
| 5.88E-12 | -0.437891614 | 0.109 | 0.254 | 7.75E-08    | 1 Zfp36l2     |
| 6.64E-12 | -0.341640041 | 0.3   | 0.491 | 8.76E-08    | 1 Cox7a2      |
| 1.06E-11 | -0.302070751 | 0.151 | 0.313 | 1.39E-07    | 1 Ost4        |
| 1.85E-11 | -0.368170567 | 0.147 | 0.304 | 2.44E-07    | 1 D8Erttd738e |
| 2.48E-11 | -0.369503586 | 0.187 | 0.35  | 3.26E-07    | 1 Clic1       |
| 2.67E-11 | -0.365318412 | 0.143 | 0.295 | 3.53E-07    | 1 Calm3       |
| 4.77E-11 | 0.480087343  | 0.433 | 0.346 | 6.29E-07    | 1 Msrb1       |
| 1.11E-10 | -0.328611053 | 0.166 | 0.32  | 1.47E-06    | 1 Canx        |
| 1.21E-10 | -0.403019122 | 0.12  | 0.256 | 1.60E-06    | 1 Pgl3        |
| 1.29E-10 | -0.308885275 | 0.16  | 0.313 | 1.70E-06    | 1 Sumo1       |
| 2.43E-10 | -0.312570227 | 0.134 | 0.274 | 3.21E-06    | 1 Tmem167     |
| 2.84E-10 | -0.313904922 | 0.137 | 0.28  | 3.75E-06    | 1 Ndufb9      |
| 3.90E-10 | 0.589622858  | 0.281 | 0.193 | 5.14E-06    | 1 Hipk1       |
| 4.09E-10 | 0.540295774  | 0.302 | 0.209 | 5.39E-06    | 1 Lims1       |
| 4.59E-10 | -0.307056774 | 0.135 | 0.276 | 6.06E-06    | 1 Ndufs6      |
| 5.04E-10 | -0.275520584 | 0.416 | 0.6   | 6.64E-06    | 1 Gm26917     |
| 5.58E-10 | 0.515597915  | 0.347 | 0.259 | 7.36E-06    | 1 Cotl1       |
| 1.30E-09 | -0.275610803 | 0.286 | 0.466 | 1.71E-05    | 1 Usmg5       |
| 2.61E-09 | -0.294052388 | 0.195 | 0.338 | 3.44E-05    | 1 Cks2        |
| 3.18E-09 | 0.540781609  | 0.265 | 0.18  | 4.19E-05    | 1 Pgd         |
| 4.27E-09 | -0.321641139 | 0.214 | 0.369 | 5.64E-05    | 1 Gm42418     |
| 4.29E-09 | -0.252378365 | 0.132 | 0.265 | 5.66E-05    | 1 Ndufs5      |
| 5.15E-09 | 0.254245524  | 0.712 | 0.684 | 6.79E-05    | 1 Actg1       |
| 5.22E-09 | -0.3224506   | 0.168 | 0.305 | 6.88E-05    | 1 Laptm5      |
| 7.99E-09 | 0.376268873  | 0.494 | 0.441 | 0.000105339 | 1 Gmfg        |
| 2.42E-08 | 0.522199679  | 0.319 | 0.244 | 0.000319192 | 1 Ostf1       |



|            |              |       |       |             |                 |
|------------|--------------|-------|-------|-------------|-----------------|
| 2.44E-08   | -0.251436612 | 0.135 | 0.26  | 0.000321683 | 1 Psmb3         |
| 2.96E-08   | -0.296815035 | 0.405 | 0.554 | 0.000389894 | 1 Ubb           |
| 3.20E-08   | 0.468081276  | 0.256 | 0.175 | 0.000422743 | 1 Cebpe         |
| 6.11E-08   | -0.280710493 | 0.145 | 0.266 | 0.000805394 | 1 Wtap          |
| 8.98E-08   | -0.31021347  | 0.151 | 0.267 | 0.001184637 | 1 Gm10282       |
| 1.03E-07   | 0.52563404   | 0.261 | 0.187 | 0.001359638 | 1 R3hdm4        |
| 1.66E-07   | 0.344706957  | 0.5   | 0.447 | 0.002194756 | 1 Alox5ap       |
| 2.45E-07   | -0.25363953  | 0.193 | 0.322 | 0.003226605 | 1 Arf5          |
| 3.38E-07   | 0.4526187    | 0.347 | 0.278 | 0.004456239 | 1 Cd44          |
| 3.40E-07   | 0.346026737  | 0.515 | 0.475 | 0.004487934 | 1 F630028O10Rik |
| 4.07E-07   | 0.473361972  | 0.29  | 0.218 | 0.00536384  | 1 Spi1          |
| 5.85E-07   | 0.375487704  | 0.458 | 0.41  | 0.007723111 | 1 Gapdh         |
| 5.90E-07   | -0.250249933 | 0.246 | 0.376 | 0.00778428  | 1 Emp3          |
| 7.54E-07   | -0.254949959 | 0.143 | 0.253 | 0.009952321 | 1 Scand1        |
| 8.51E-07   | 0.449785036  | 0.345 | 0.287 | 0.011224894 | 1 Pkm           |
| 1.10E-06   | -0.303485785 | 0.155 | 0.263 | 0.01444753  | 1 Btg1          |
| 1.94E-06   | 0.380705507  | 0.321 | 0.252 | 0.025589236 | 1 Lmo4          |
| 7.81E-06   | 0.405517766  | 0.403 | 0.369 | 0.102959438 | 1 Arpc5         |
| 1.15E-05   | 0.350239442  | 0.279 | 0.214 | 0.151998925 | 1 Smim14        |
| 1.85E-05   | -0.307240594 | 0.542 | 0.621 | 0.244136262 | 1 Ly6c2         |
| 2.45E-05   | 0.343514535  | 0.403 | 0.362 | 0.322849813 | 1 Gsr           |
| 2.93E-05   | 0.413518348  | 0.305 | 0.251 | 0.385866134 | 1 Flna          |
| 6.87E-05   | 0.356632822  | 0.368 | 0.32  | 0.905614221 | 1 Scp2          |
| 0.00011521 | 0.411165466  | 0.305 | 0.267 | 1           | 1 Aldoa         |
| 0.00117658 | -0.254490752 | 0.511 | 0.594 | 1           | 1 Hmgn2         |
| 1.33E-229  | 1.304980527  | 1     | 0.999 | 1.75E-225   | 2 S100a8        |
| 2.06E-214  | 1.267085648  | 1     | 0.994 | 2.72E-210   | 2 S100a9        |
| 3.25E-202  | 1.284437687  | 0.994 | 0.52  | 4.29E-198   | 2 Lcn2          |
| 1.64E-198  | 1.261966447  | 0.998 | 0.598 | 2.17E-194   | 2 Wfdc21        |
| 2.86E-198  | 1.2631261    | 1     | 0.925 | 3.77E-194   | 2 Camp          |
| 1.66E-194  | 1.210636143  | 0.998 | 0.501 | 2.19E-190   | 2 Ltf           |

**Neutrophil**

|           |              |       |       |           |           |
|-----------|--------------|-------|-------|-----------|-----------|
| 2.94E-193 | 1.263990796  | 1     | 0.836 | 3.87E-189 | 2 Ngp     |
| 8.14E-171 | -1.525007909 | 0.626 | 0.925 | 1.07E-166 | 2 Rps28   |
| 5.83E-164 | -1.271998174 | 0.834 | 0.966 | 7.69E-160 | 2 Rpl41   |
| 2.35E-162 | -1.041159555 | 0.915 | 0.981 | 3.10E-158 | 2 Rps29   |
| 9.98E-155 | 1.077704017  | 0.915 | 0.407 | 1.32E-150 | 2 Pglyrp1 |
| 2.81E-150 | 1.268075524  | 0.811 | 0.321 | 3.70E-146 | 2 Ifitm6  |
| 1.05E-148 | -1.543793829 | 0.559 | 0.884 | 1.38E-144 | 2 Rpl35   |
| 1.20E-147 | -1.359393543 | 0.574 | 0.9   | 1.59E-143 | 2 Rpl18a  |
| 4.05E-146 | -1.120286602 | 0.771 | 0.953 | 5.35E-142 | 2 Rpl37a  |
| 3.59E-139 | -1.249547622 | 0.669 | 0.917 | 4.74E-135 | 2 Rps19   |
| 5.88E-138 | -1.406284716 | 0.545 | 0.878 | 7.75E-134 | 2 Rpl13   |
| 3.70E-137 | -0.982492502 | 0.834 | 0.967 | 4.87E-133 | 2 Rps27   |
| 6.25E-132 | -1.387263726 | 0.52  | 0.863 | 8.24E-128 | 2 Rps18   |
| 2.33E-131 | 0.980666258  | 0.931 | 0.519 | 3.07E-127 | 2 Chil3   |
| 1.52E-123 | 1.047944462  | 0.838 | 0.393 | 2.00E-119 | 2 Anxa1   |
| 3.20E-123 | -1.344469677 | 0.41  | 0.828 | 4.21E-119 | 2 Rps11   |
| 4.70E-123 | -1.216106    | 0.605 | 0.89  | 6.20E-119 | 2 Rpl32   |
| 2.28E-122 | -1.404482235 | 0.408 | 0.818 | 3.01E-118 | 2 Rps5    |
| 5.22E-122 | -1.12353688  | 0.624 | 0.904 | 6.89E-118 | 2 Rps14   |
| 3.61E-121 | -1.082223497 | 0.694 | 0.92  | 4.77E-117 | 2 Rpl37   |
| 4.76E-121 | -1.315086303 | 0.468 | 0.841 | 6.28E-117 | 2 Rps23   |
| 4.95E-116 | -1.253063408 | 0.451 | 0.84  | 6.53E-112 | 2 Rpl13a  |
| 6.85E-113 | -1.46873876  | 0.283 | 0.761 | 9.04E-109 | 2 Rplp1   |
| 5.01E-109 | -0.817136602 | 0.863 | 0.963 | 6.61E-105 | 2 mt-Co3  |
| 3.31E-107 | -1.52162957  | 0.235 | 0.714 | 4.37E-103 | 2 Gm2000  |
| 4.82E-107 | -1.141216802 | 0.482 | 0.836 | 6.36E-103 | 2 Rps16   |
| 1.06E-106 | -1.060065219 | 0.578 | 0.884 | 1.40E-102 | 2 mt-Atp6 |
| 1.84E-106 | -1.172392572 | 0.555 | 0.861 | 2.43E-102 | 2 Rps8    |
| 2.21E-105 | -1.246059541 | 0.434 | 0.807 | 2.91E-101 | 2 Rpl39   |
| 1.94E-104 | -1.093751092 | 0.503 | 0.847 | 2.56E-100 | 2 Rpl23a  |
| 6.63E-104 | -1.321508085 | 0.303 | 0.762 | 8.75E-100 | 2 Rps4x   |

|           |              |       |       |          |   |         |
|-----------|--------------|-------|-------|----------|---|---------|
| 1.39E-102 | -1.047058388 | 0.59  | 0.872 | 1.83E-98 | 2 | Rpl38   |
| 1.69E-101 | -1.043908817 | 0.543 | 0.87  | 2.22E-97 | 2 | Rps27rt |
| 4.12E-101 | -1.255584302 | 0.414 | 0.783 | 5.43E-97 | 2 | Gm10076 |
| 1.36E-100 | -1.477030531 | 0.202 | 0.685 | 1.80E-96 | 2 | Gm10263 |
| 3.40E-100 | -1.090836614 | 0.578 | 0.865 | 4.49E-96 | 2 | Ptma    |
| 1.05E-97  | -0.907523349 | 0.638 | 0.898 | 1.38E-93 | 2 | Rps27a  |
| 2.81E-97  | -1.137366034 | 0.457 | 0.806 | 3.70E-93 | 2 | Rplp2   |
| 3.35E-97  | -1.317979902 | 0.328 | 0.744 | 4.41E-93 | 2 | Rplp0   |
| 5.77E-97  | -1.330939469 | 0.291 | 0.731 | 7.62E-93 | 2 | Rpl10   |
| 1.71E-96  | -1.228550363 | 0.435 | 0.794 | 2.26E-92 | 2 | Rpl36   |
| 3.00E-96  | -1.13854965  | 0.445 | 0.801 | 3.95E-92 | 2 | Rps3a1  |
| 1.21E-95  | -1.109262276 | 0.453 | 0.809 | 1.60E-91 | 2 | Rpl26   |
| 3.70E-95  | -1.253680286 | 0.351 | 0.754 | 4.88E-91 | 2 | Rpl6    |
| 2.92E-94  | -1.18000257  | 0.383 | 0.779 | 3.85E-90 | 2 | Rps6    |
| 2.36E-91  | -1.056576946 | 0.414 | 0.799 | 3.11E-87 | 2 | Rpl21   |
| 5.43E-91  | -1.215775955 | 0.364 | 0.756 | 7.16E-87 | 2 | Rps26   |
| 1.61E-90  | -1.143197389 | 0.395 | 0.772 | 2.12E-86 | 2 | Rpl23   |
| 4.51E-90  | -1.184048487 | 0.358 | 0.753 | 5.95E-86 | 2 | Rpl27a  |
| 8.83E-89  | -0.980585456 | 0.509 | 0.831 | 1.16E-84 | 2 | Rps24   |
| 1.31E-88  | -1.306414469 | 0.256 | 0.695 | 1.73E-84 | 2 | Eef1a1  |
| 6.46E-88  | -1.31655253  | 0.329 | 0.717 | 8.53E-84 | 2 | Rpl14   |
| 4.15E-86  | -1.049748267 | 0.443 | 0.791 | 5.47E-82 | 2 | Rpl17   |
| 6.95E-86  | -1.115551523 | 0.372 | 0.753 | 9.17E-82 | 2 | Rpl19   |
| 7.32E-86  | -1.200326544 | 0.318 | 0.716 | 9.65E-82 | 2 | Rpsa    |
| 2.37E-85  | -1.072301741 | 0.424 | 0.778 | 3.13E-81 | 2 | Rps15a  |
| 4.10E-85  | -1.359392839 | 0.258 | 0.678 | 5.40E-81 | 2 | Rpl36a  |
| 4.66E-85  | -0.804559992 | 0.692 | 0.888 | 6.15E-81 | 2 | Rpl35a  |
| 4.63E-83  | -1.396102202 | 0.197 | 0.636 | 6.11E-79 | 2 | Rpl3    |
| 7.49E-83  | -1.156624392 | 0.328 | 0.723 | 9.88E-79 | 2 | Rps7    |
| 1.41E-81  | -1.097328153 | 0.37  | 0.747 | 1.86E-77 | 2 | Rpl11   |
| 2.35E-81  | -0.576396455 | 0.942 | 0.982 | 3.10E-77 | 2 | mt-Co1  |

|          |              |       |       |          |              |
|----------|--------------|-------|-------|----------|--------------|
| 6.31E-80 | -1.073226132 | 0.368 | 0.74  | 8.32E-76 | 2 Rpl28      |
| 1.34E-79 | -1.139520045 | 0.303 | 0.703 | 1.77E-75 | 2 Rpl23a-ps3 |
| 1.93E-79 | -1.772705686 | 0.453 | 0.765 | 2.55E-75 | 2 Tmsb10     |
| 5.40E-79 | -1.905613504 | 0.276 | 0.669 | 7.12E-75 | 2 Crip1      |
| 7.31E-78 | -1.063037537 | 0.405 | 0.749 | 9.64E-74 | 2 Rps17      |
| 7.60E-77 | -0.881225461 | 0.547 | 0.828 | 1.00E-72 | 2 Rpl34      |
| 5.15E-76 | -0.991434303 | 0.428 | 0.772 | 6.79E-72 | 2 Rpl24      |
| 7.42E-76 | -0.946813719 | 0.472 | 0.786 | 9.79E-72 | 2 Rps3       |
| 7.56E-76 | -0.653961277 | 0.775 | 0.932 | 9.97E-72 | 2 Fau        |
| 2.59E-75 | -0.941075115 | 0.424 | 0.773 | 3.41E-71 | 2 Rps15      |
| 1.11E-74 | -1.002370528 | 0.358 | 0.738 | 1.46E-70 | 2 Tpt1       |
| 4.21E-74 | -1.148306497 | 0.304 | 0.69  | 5.55E-70 | 2 Rps12      |
| 1.72E-73 | -1.136942973 | 0.266 | 0.663 | 2.27E-69 | 2 Uba52      |
| 6.83E-73 | -1.266501941 | 0.349 | 0.713 | 9.01E-69 | 2 Plac8      |
| 3.02E-72 | 1.005297434  | 0.501 | 0.188 | 3.98E-68 | 2 Cd177      |
| 4.53E-70 | -1.070684645 | 0.322 | 0.692 | 5.98E-66 | 2 Rps20      |
| 4.86E-70 | -1.243639265 | 0.206 | 0.608 | 6.41E-66 | 2 Rpl10a     |
| 7.53E-70 | -1.375699985 | 0.193 | 0.586 | 9.93E-66 | 2 Rps2       |
| 1.12E-69 | -1.125709945 | 0.245 | 0.643 | 1.47E-65 | 2 Gm11808    |
| 7.34E-69 | -1.7374683   | 0.106 | 0.51  | 9.68E-65 | 2 Lgals1     |
| 2.34E-68 | -1.013370404 | 0.374 | 0.733 | 3.09E-64 | 2 mt-Cytb    |
| 2.70E-68 | -1.073218746 | 0.295 | 0.674 | 3.56E-64 | 2 Rpl18      |
| 2.01E-67 | -1.201701712 | 0.22  | 0.61  | 2.66E-63 | 2 Rpl15      |
| 1.77E-66 | -1.046352234 | 0.306 | 0.678 | 2.33E-62 | 2 Rpl8       |
| 2.28E-66 | -0.904676109 | 0.435 | 0.753 | 3.00E-62 | 2 Rps25      |
| 1.69E-65 | -1.112420815 | 0.272 | 0.651 | 2.23E-61 | 2 mt-Nd1     |
| 2.61E-65 | -1.397400844 | 0.104 | 0.502 | 3.45E-61 | 2 Rps18-ps3  |
| 1.59E-64 | -0.952720275 | 0.383 | 0.719 | 2.09E-60 | 2 Rps13      |
| 1.66E-64 | -1.098031574 | 0.239 | 0.621 | 2.18E-60 | 2 Wdr89      |
| 1.92E-63 | -0.972767641 | 0.389 | 0.717 | 2.54E-59 | 2 Hmgb1      |
| 2.43E-62 | -0.922506711 | 0.362 | 0.708 | 3.21E-58 | 2 Rpl27      |

|          |              |       |       |          |   |           |
|----------|--------------|-------|-------|----------|---|-----------|
| 4.04E-62 | -1.405550125 | 0.11  | 0.5   | 5.33E-58 | 2 | Ly6e      |
| 4.84E-62 | -1.406771023 | 0.085 | 0.471 | 6.38E-58 | 2 | Gm10073   |
| 1.54E-61 | -0.936923049 | 0.414 | 0.735 | 2.03E-57 | 2 | Rpl31     |
| 3.61E-61 | -1.146371463 | 0.17  | 0.557 | 4.76E-57 | 2 | Rpl22     |
| 6.70E-61 | 0.643652214  | 0.859 | 0.626 | 8.84E-57 | 2 | Prdx5     |
| 1.62E-60 | -1.38882959  | 0.202 | 0.573 | 2.14E-56 | 2 | Psap      |
| 2.02E-59 | 0.676810381  | 0.788 | 0.476 | 2.66E-55 | 2 | Cybb      |
| 8.53E-59 | -1.244222119 | 0.118 | 0.5   | 1.13E-54 | 2 | Gm8730    |
| 5.86E-58 | -1.246708956 | 0.133 | 0.505 | 7.73E-54 | 2 | Rps26-ps1 |
| 3.86E-57 | -0.746915168 | 0.557 | 0.813 | 5.10E-53 | 2 | Ppia      |
| 1.23E-56 | -1.22379432  | 0.148 | 0.514 | 1.62E-52 | 2 | Rpl12     |
| 3.40E-56 | -1.26892184  | 0.094 | 0.464 | 4.49E-52 | 2 | Gm9493    |
| 4.91E-56 | -1.168064177 | 0.328 | 0.659 | 6.47E-52 | 2 | Cst3      |
| 5.70E-56 | -0.639125904 | 0.711 | 0.887 | 7.52E-52 | 2 | Rps9      |
| 7.04E-56 | -0.946288888 | 0.31  | 0.665 | 9.29E-52 | 2 | Xist      |
| 1.86E-55 | -0.767820273 | 0.603 | 0.84  | 2.45E-51 | 2 | Ftl1      |
| 2.68E-55 | -1.236298101 | 0.135 | 0.496 | 3.53E-51 | 2 | Rpl10-ps3 |
| 3.46E-55 | -0.973377605 | 0.293 | 0.636 | 4.57E-51 | 2 | Rps21     |
| 1.78E-54 | -1.193550283 | 0.119 | 0.487 | 2.35E-50 | 2 | Rps12-ps3 |
| 1.22E-52 | -0.853772568 | 0.378 | 0.682 | 1.61E-48 | 2 | Rps10     |
| 6.03E-52 | -0.631116835 | 0.992 | 0.998 | 7.95E-48 | 2 | Malat1    |
| 1.35E-51 | -0.954698809 | 0.283 | 0.617 | 1.79E-47 | 2 | Rpl4      |
| 1.57E-50 | -1.079518586 | 0.146 | 0.499 | 2.07E-46 | 2 | Rpl29     |
| 1.07E-48 | -1.123106405 | 0.119 | 0.462 | 1.42E-44 | 2 | Rpl13-ps3 |
| 1.13E-48 | -0.648116518 | 0.549 | 0.812 | 1.49E-44 | 2 | Gm9843    |
| 1.77E-48 | -0.935119279 | 0.258 | 0.598 | 2.34E-44 | 2 | mt-Nd4    |
| 1.44E-47 | -0.70561453  | 0.495 | 0.767 | 1.90E-43 | 2 | Rpl9      |
| 8.27E-47 | -1.193036669 | 0.127 | 0.455 | 1.09E-42 | 2 | Prdx1     |
| 8.46E-47 | -0.916015961 | 0.239 | 0.572 | 1.12E-42 | 2 | Hspa8     |
| 1.19E-46 | 0.808027183  | 0.266 | 0.078 | 1.57E-42 | 2 | AA467197  |
| 2.44E-45 | -1.138326191 | 0.108 | 0.429 | 3.22E-41 | 2 | Rpl36-ps3 |

|          |              |       |       |          |   |           |
|----------|--------------|-------|-------|----------|---|-----------|
| 6.65E-45 | 0.887832961  | 0.391 | 0.163 | 8.77E-41 | 2 | Cebpe     |
| 1.48E-44 | -0.74908227  | 0.457 | 0.727 | 1.95E-40 | 2 | Sub1      |
| 1.57E-44 | -0.846916031 | 0.241 | 0.574 | 2.07E-40 | 2 | Rpl7      |
| 2.37E-44 | -0.815577028 | 0.264 | 0.601 | 3.13E-40 | 2 | Rpl36a1   |
| 3.45E-44 | -1.197887611 | 0.094 | 0.408 | 4.55E-40 | 2 | Npm1      |
| 4.85E-43 | -0.916128318 | 0.37  | 0.666 | 6.40E-39 | 2 | Fth1      |
| 9.10E-43 | 0.285811716  | 1     | 0.898 | 1.20E-38 | 2 | Lyz2      |
| 2.62E-42 | -1.010613425 | 0.202 | 0.523 | 3.45E-38 | 2 | Tubb5     |
| 3.31E-42 | 0.509959019  | 0.796 | 0.563 | 4.36E-38 | 2 | S100a11   |
| 5.51E-42 | -1.438610205 | 0.05  | 0.341 | 7.27E-38 | 2 | Ms4a6c    |
| 6.25E-42 | 0.540618178  | 0.827 | 0.651 | 8.24E-38 | 2 | Arhgdib   |
| 1.02E-41 | -0.920943668 | 0.177 | 0.5   | 1.34E-37 | 2 | Rpl27-ps3 |
| 4.17E-41 | -0.975408484 | 0.148 | 0.464 | 5.50E-37 | 2 | Gnb2l1    |
| 7.11E-40 | 0.789215341  | 0.437 | 0.211 | 9.38E-36 | 2 | Cpne3     |
| 4.56E-39 | -0.819004552 | 0.241 | 0.544 | 6.01E-35 | 2 | Snrpg     |
| 3.76E-38 | -0.96659141  | 0.148 | 0.443 | 4.95E-34 | 2 | Hsp90ab1  |
| 3.04E-37 | -0.874795472 | 0.195 | 0.489 | 4.01E-33 | 2 | Rpl30     |
| 9.23E-37 | -1.413485233 | 0.035 | 0.295 | 1.22E-32 | 2 | Ccr2      |
| 1.59E-36 | -0.858433749 | 0.15  | 0.451 | 2.10E-32 | 2 | Eef2      |
| 5.31E-36 | -0.903211905 | 0.127 | 0.42  | 7.01E-32 | 2 | mt-Atp8   |
| 3.07E-35 | -1.455280178 | 0.112 | 0.381 | 4.05E-31 | 2 | Ifi27l2a  |
| 4.08E-35 | -0.97610932  | 0.071 | 0.343 | 5.38E-31 | 2 | Gm10036   |
| 4.80E-35 | -0.883084648 | 0.183 | 0.472 | 6.33E-31 | 2 | Psm7      |
| 1.94E-34 | -1.002847084 | 0.089 | 0.358 | 2.56E-30 | 2 | Nop10     |
| 1.99E-34 | -0.861315878 | 0.168 | 0.454 | 2.62E-30 | 2 | Rpl5      |
| 2.55E-34 | -0.99233776  | 0.092 | 0.363 | 3.37E-30 | 2 | Set       |
| 2.86E-34 | -0.754721404 | 0.235 | 0.523 | 3.77E-30 | 2 | Rpl7a     |
| 3.10E-34 | -0.916195164 | 0.096 | 0.373 | 4.08E-30 | 2 | Rpl6l     |
| 3.57E-34 | -0.823831414 | 0.252 | 0.527 | 4.71E-30 | 2 | Rpl22l1   |
| 6.16E-34 | -1.212851411 | 0.015 | 0.255 | 8.13E-30 | 2 | Zeb2      |
| 6.47E-34 | 0.443161337  | 0.842 | 0.67  | 8.54E-30 | 2 | Cyba      |

|          |              |       |       |          |            |
|----------|--------------|-------|-------|----------|------------|
| 7.49E-34 | 0.589623782  | 0.647 | 0.438 | 9.88E-30 | 2 Hp       |
| 1.18E-33 | 0.479349326  | 0.765 | 0.572 | 1.55E-29 | 2 Hmgn2    |
| 2.27E-33 | -0.774462249 | 0.218 | 0.5   | 3.00E-29 | 2 Rps27l   |
| 7.29E-33 | -1.205804781 | 0.035 | 0.277 | 9.61E-29 | 2 Gm9844   |
| 7.36E-33 | -0.613736347 | 0.414 | 0.676 | 9.71E-29 | 2 mt-Co2   |
| 8.07E-33 | -0.966201855 | 0.094 | 0.356 | 1.06E-28 | 2 Hnrnpa1  |
| 1.17E-32 | -1.018446632 | 0.056 | 0.304 | 1.54E-28 | 2 Eef1g    |
| 1.26E-32 | -1.150851695 | 0.064 | 0.315 | 1.66E-28 | 2 Pdcd4    |
| 1.41E-32 | -0.844188908 | 0.173 | 0.45  | 1.86E-28 | 2 Serbp1   |
| 1.55E-32 | -1.001940216 | 0.104 | 0.366 | 2.05E-28 | 2 H2afy    |
| 2.14E-32 | -0.935560546 | 0.118 | 0.378 | 2.82E-28 | 2 Snrpf    |
| 2.79E-32 | -0.932708137 | 0.067 | 0.325 | 3.68E-28 | 2 mt-Nd2   |
| 1.25E-31 | -0.92683853  | 0.091 | 0.346 | 1.65E-27 | 2 Hsp90aa1 |
| 2.09E-31 | -0.776409134 | 0.258 | 0.53  | 2.76E-27 | 2 Cbx3     |
| 7.94E-31 | -0.772655629 | 0.179 | 0.448 | 1.05E-26 | 2 Hint1    |
| 8.67E-31 | -0.874610914 | 0.089 | 0.345 | 1.14E-26 | 2 Slc25a5  |
| 1.42E-30 | -0.863739648 | 0.083 | 0.338 | 1.87E-26 | 2 Eef1b2   |
| 1.80E-30 | -0.948433686 | 0.091 | 0.342 | 2.37E-26 | 2 Npc2     |
| 2.27E-29 | 0.60294341   | 0.576 | 0.381 | 2.99E-25 | 2 Dstn     |
| 5.64E-29 | -0.711289877 | 0.206 | 0.473 | 7.43E-25 | 2 Naca     |
| 9.76E-29 | 0.708031298  | 0.318 | 0.145 | 1.29E-24 | 2 Cd9      |
| 1.72E-28 | -0.716641312 | 0.339 | 0.598 | 2.27E-24 | 2 H2-D1    |
| 2.38E-28 | -0.859824759 | 0.087 | 0.325 | 3.13E-24 | 2 Polr2l   |
| 2.91E-28 | -0.8639115   | 0.069 | 0.302 | 3.84E-24 | 2 Gm10269  |
| 3.13E-28 | -1.061307934 | 0.058 | 0.282 | 4.13E-24 | 2 S100a10  |
| 7.01E-28 | -0.777346121 | 0.17  | 0.424 | 9.25E-24 | 2 Dbi      |
| 7.42E-28 | -0.65928944  | 0.233 | 0.493 | 9.79E-24 | 2 Ndufa4   |
| 1.07E-27 | -0.755025994 | 0.162 | 0.412 | 1.41E-23 | 2 Gm8186   |
| 3.38E-27 | -0.846385012 | 0.108 | 0.344 | 4.46E-23 | 2 Ranbp1   |
| 8.62E-27 | -0.577081213 | 0.339 | 0.594 | 1.14E-22 | 2 Cox8a    |
| 1.39E-26 | -0.752398182 | 0.146 | 0.387 | 1.83E-22 | 2 Tuba1b   |

|          |              |       |       |          |   |           |
|----------|--------------|-------|-------|----------|---|-----------|
| 1.58E-26 | -0.816171014 | 0.1   | 0.333 | 2.09E-22 | 2 | Atp5g1    |
| 2.60E-26 | -0.822219302 | 0.114 | 0.344 | 3.44E-22 | 2 | Eif3f     |
| 2.71E-26 | -0.800165172 | 0.075 | 0.303 | 3.57E-22 | 2 | Nsa2      |
| 5.55E-26 | -0.94817788  | 0.06  | 0.272 | 7.32E-22 | 2 | Ncl       |
| 6.84E-26 | -0.66641533  | 0.216 | 0.468 | 9.03E-22 | 2 | Rpl9-ps6  |
| 2.60E-25 | -0.601905681 | 0.243 | 0.503 | 3.44E-21 | 2 | Uqcrh     |
| 5.30E-25 | -0.746567118 | 0.096 | 0.32  | 7.00E-21 | 2 | Erh       |
| 5.46E-25 | -0.64988069  | 0.222 | 0.471 | 7.20E-21 | 2 | Hnrnpa3   |
| 6.32E-25 | -0.539088269 | 0.617 | 0.784 | 8.33E-21 | 2 | B2m       |
| 8.30E-25 | -0.735602962 | 0.15  | 0.387 | 1.09E-20 | 2 | Dek       |
| 2.21E-24 | 0.6706211    | 0.337 | 0.172 | 2.92E-20 | 2 | Adpgk     |
| 2.72E-24 | -0.528622973 | 0.435 | 0.655 | 3.59E-20 | 2 | Sec61g    |
| 2.95E-24 | -0.455563606 | 0.543 | 0.759 | 3.90E-20 | 2 | H3f3b     |
| 5.48E-24 | -1.065090231 | 0.185 | 0.403 | 7.23E-20 | 2 | Hist1h2ap |
| 6.53E-24 | -0.692962633 | 0.166 | 0.395 | 8.62E-20 | 2 | Btf3      |
| 1.62E-23 | -0.583459114 | 0.252 | 0.498 | 2.14E-19 | 2 | Morf4l1   |
| 1.21E-22 | -0.570306592 | 0.231 | 0.47  | 1.60E-18 | 2 | Uqcr11    |
| 2.07E-22 | -0.64658857  | 0.162 | 0.384 | 2.73E-18 | 2 | Ran       |
| 3.57E-22 | -0.689097166 | 0.17  | 0.391 | 4.72E-18 | 2 | Srrm2     |
| 3.90E-22 | -0.484761072 | 0.468 | 0.683 | 5.15E-18 | 2 | Cox4i1    |
| 6.57E-22 | -0.73823953  | 0.092 | 0.294 | 8.66E-18 | 2 | Bola2     |
| 7.39E-22 | -0.830839819 | 0.075 | 0.266 | 9.75E-18 | 2 | Psmb8     |
| 9.51E-22 | -0.628313666 | 0.295 | 0.522 | 1.25E-17 | 2 | Mbnl1     |
| 9.97E-22 | -0.649989513 | 0.206 | 0.431 | 1.32E-17 | 2 | Stmn1     |
| 2.01E-21 | -0.607418141 | 0.179 | 0.403 | 2.66E-17 | 2 | Eif2s2    |
| 2.27E-21 | -1.621031497 | 0.079 | 0.262 | 2.99E-17 | 2 | Elane     |
| 2.84E-21 | -0.606776389 | 0.231 | 0.452 | 3.75E-17 | 2 | Ybx1      |
| 3.02E-21 | 0.648897066  | 0.353 | 0.2   | 3.99E-17 | 2 | Serpinb1a |
| 5.89E-20 | -0.529753833 | 0.306 | 0.53  | 7.77E-16 | 2 | Pabpc1    |
| 5.97E-20 | 0.547319255  | 0.366 | 0.211 | 7.87E-16 | 2 | Cd63      |
| 6.26E-20 | -0.63322978  | 0.114 | 0.315 | 8.26E-16 | 2 | Atp5g2    |



|          |              |       |       |          |   |           |
|----------|--------------|-------|-------|----------|---|-----------|
| 8.31E-20 | -0.771270478 | 0.077 | 0.259 | 1.10E-15 | 2 | Calr      |
| 1.44E-19 | -0.601221068 | 0.183 | 0.393 | 1.90E-15 | 2 | H2afv     |
| 1.48E-19 | -0.586216383 | 0.254 | 0.468 | 1.96E-15 | 2 | Atpif1    |
| 1.73E-19 | -0.445382238 | 0.408 | 0.62  | 2.28E-15 | 2 | Cox7c     |
| 1.96E-19 | -0.412124148 | 0.605 | 0.757 | 2.58E-15 | 2 | Gpx1      |
| 2.75E-19 | -0.634054236 | 0.131 | 0.33  | 3.62E-15 | 2 | Eif3k     |
| 2.92E-19 | -0.585331659 | 0.104 | 0.302 | 3.85E-15 | 2 | Eif4a1    |
| 3.55E-19 | -0.554804891 | 0.235 | 0.449 | 4.68E-15 | 2 | Serinc3   |
| 3.64E-19 | -0.664002355 | 0.17  | 0.374 | 4.80E-15 | 2 | H2-K1     |
| 3.86E-19 | -0.636104321 | 0.135 | 0.335 | 5.09E-15 | 2 | Gm10116   |
| 4.04E-19 | -0.507515118 | 0.26  | 0.493 | 5.33E-15 | 2 | H2afj     |
| 5.91E-19 | -0.55851027  | 0.112 | 0.309 | 7.79E-15 | 2 | Nap1l1    |
| 1.29E-18 | -0.388798743 | 0.514 | 0.713 | 1.70E-14 | 2 | Oaz1      |
| 1.31E-18 | -0.619392608 | 0.129 | 0.32  | 1.72E-14 | 2 | Tsix      |
| 2.01E-18 | -0.598830081 | 0.083 | 0.262 | 2.65E-14 | 2 | Eif3h     |
| 2.06E-18 | -1.288194458 | 0.114 | 0.284 | 2.72E-14 | 2 | Mpo       |
| 2.98E-18 | -0.433196229 | 0.355 | 0.578 | 3.93E-14 | 2 | Calm2     |
| 9.03E-18 | -0.551383881 | 0.15  | 0.351 | 1.19E-13 | 2 | Pomp      |
| 9.32E-18 | -0.547813055 | 0.133 | 0.328 | 1.23E-13 | 2 | Cycs      |
| 1.15E-17 | -0.525444344 | 0.154 | 0.352 | 1.52E-13 | 2 | Nucks1    |
| 1.48E-17 | -0.493197652 | 0.345 | 0.553 | 1.96E-13 | 2 | Mrpl33    |
| 1.49E-17 | -0.556455541 | 0.129 | 0.323 | 1.96E-13 | 2 | Canx      |
| 1.80E-17 | -0.550861912 | 0.125 | 0.316 | 2.38E-13 | 2 | Sfpq      |
| 2.02E-17 | -0.480179216 | 0.193 | 0.399 | 2.67E-13 | 2 | Minos1    |
| 5.70E-17 | 0.626445384  | 0.266 | 0.143 | 7.52E-13 | 2 | Glrx      |
| 5.85E-17 | -0.508174423 | 0.225 | 0.424 | 7.71E-13 | 2 | Anp32b    |
| 7.84E-17 | -0.585797372 | 0.102 | 0.277 | 1.03E-12 | 2 | Prrc2c    |
| 9.38E-17 | -1.141775524 | 0.125 | 0.286 | 1.24E-12 | 2 | Prtn3     |
| 1.08E-16 | -0.429509036 | 0.389 | 0.584 | 1.43E-12 | 2 | Hnrnpa2b1 |
| 1.22E-16 | -0.537309263 | 0.1   | 0.277 | 1.61E-12 | 2 | Snrpd2    |
| 1.43E-16 | -0.397805476 | 0.472 | 0.665 | 1.89E-12 | 2 | Atp5l     |

|          |              |       |       |          |   |         |
|----------|--------------|-------|-------|----------|---|---------|
| 1.56E-16 | -0.523652294 | 0.173 | 0.363 | 2.05E-12 | 2 | Ptpn18  |
| 1.96E-16 | -0.418190535 | 0.264 | 0.477 | 2.58E-12 | 2 | Ndufa2  |
| 1.99E-16 | -0.722618861 | 0.106 | 0.271 | 2.63E-12 | 2 | Cebpb   |
| 2.21E-16 | -0.556748472 | 0.1   | 0.274 | 2.92E-12 | 2 | Atp5g3  |
| 2.38E-16 | -0.563330667 | 0.106 | 0.278 | 3.13E-12 | 2 | Snrpb   |
| 2.44E-16 | -0.598307739 | 0.123 | 0.299 | 3.22E-12 | 2 | Tmpo    |
| 3.75E-16 | -0.565271809 | 0.118 | 0.292 | 4.95E-12 | 2 | mt-Nd4l |
| 3.84E-16 | -0.437502723 | 0.237 | 0.445 | 5.07E-12 | 2 | Sumo2   |
| 7.67E-16 | -0.337064842 | 0.628 | 0.788 | 1.01E-11 | 2 | H3f3a   |
| 9.07E-16 | -0.489403705 | 0.15  | 0.336 | 1.20E-11 | 2 | Hnrnpu  |
| 9.40E-16 | 0.60222906   | 0.297 | 0.171 | 1.24E-11 | 2 | Ckap4   |
| 1.10E-15 | -0.544672292 | 0.102 | 0.27  | 1.45E-11 | 2 | Alyref  |
| 1.24E-15 | -0.539843066 | 0.1   | 0.267 | 1.64E-11 | 2 | Eif3a   |
| 1.50E-15 | -0.528715323 | 0.125 | 0.301 | 1.98E-11 | 2 | Psmb1   |
| 1.59E-15 | -0.480241599 | 0.229 | 0.427 | 2.10E-11 | 2 | Atox1   |
| 2.08E-15 | -0.449658349 | 0.287 | 0.484 | 2.75E-11 | 2 | Cox5b   |
| 4.21E-15 | -0.433708517 | 0.256 | 0.459 | 5.56E-11 | 2 | Hnrnpf  |
| 4.33E-15 | -0.574050845 | 0.171 | 0.347 | 5.71E-11 | 2 | Notch2  |
| 4.43E-15 | -0.551778635 | 0.1   | 0.262 | 5.84E-11 | 2 | Rbm25   |
| 4.82E-15 | -0.508609102 | 0.123 | 0.295 | 6.36E-11 | 2 | Hnrnpab |
| 7.11E-15 | 0.252204221  | 0.825 | 0.722 | 9.38E-11 | 2 | Cd52    |
| 1.04E-14 | 0.493296132  | 0.387 | 0.255 | 1.37E-10 | 2 | Clec4a2 |
| 1.09E-14 | -0.441059145 | 0.224 | 0.413 | 1.44E-10 | 2 | Tomm7   |
| 1.33E-14 | 0.487167447  | 0.333 | 0.197 | 1.75E-10 | 2 | Fcnb    |
| 1.45E-14 | -0.545933027 | 0.378 | 0.546 | 1.92E-10 | 2 | S100a6  |
| 1.56E-14 | -0.528735697 | 0.162 | 0.332 | 2.05E-10 | 2 | Top2a   |
| 2.10E-14 | -0.371176868 | 0.339 | 0.541 | 2.77E-10 | 2 | Tma7    |
| 2.80E-14 | -0.455765582 | 0.156 | 0.332 | 3.69E-10 | 2 | Nedd8   |
| 3.05E-14 | -0.412112895 | 0.195 | 0.379 | 4.02E-10 | 2 | Son     |
| 3.07E-14 | -0.525808916 | 0.096 | 0.252 | 4.05E-10 | 2 | Cks1b   |
| 3.27E-14 | -0.437406552 | 0.202 | 0.389 | 4.31E-10 | 2 | Tmem256 |

|          |              |       |       |          |                 |
|----------|--------------|-------|-------|----------|-----------------|
| 3.31E-14 | -0.430851231 | 0.218 | 0.405 | 4.37E-10 | 2 Smdt1         |
| 3.43E-14 | -0.442154593 | 0.195 | 0.377 | 4.52E-10 | 2 BC005537      |
| 3.73E-14 | -0.552747926 | 0.102 | 0.258 | 4.91E-10 | 2 Fxyd5         |
| 3.79E-14 | -0.553761261 | 0.1   | 0.252 | 5.00E-10 | 2 Eif5b         |
| 5.48E-14 | -0.490105108 | 0.168 | 0.341 | 7.23E-10 | 2 Ndufa7        |
| 7.06E-14 | -0.460514747 | 0.125 | 0.29  | 9.31E-10 | 2 Arglu1        |
| 7.80E-14 | -0.45658286  | 0.21  | 0.387 | 1.03E-09 | 2 Srsf2         |
| 1.06E-13 | -0.458859557 | 0.131 | 0.296 | 1.40E-09 | 2 Tra2b         |
| 1.33E-13 | -0.522449902 | 0.121 | 0.276 | 1.76E-09 | 2 Gnas          |
| 1.39E-13 | -0.452311192 | 0.162 | 0.33  | 1.84E-09 | 2 Snrpe         |
| 2.01E-13 | 0.499964357  | 0.324 | 0.201 | 2.65E-09 | 2 Mcemp1        |
| 2.14E-13 | -0.471646703 | 0.135 | 0.297 | 2.83E-09 | 2 Cmtm7         |
| 2.74E-13 | -0.460704015 | 0.183 | 0.355 | 3.61E-09 | 2 Hsp90b1       |
| 2.88E-13 | -0.484597517 | 0.129 | 0.285 | 3.80E-09 | 2 Ywhae         |
| 3.46E-13 | -0.39912053  | 0.233 | 0.419 | 4.57E-09 | 2 Pfdn5         |
| 4.35E-13 | -0.356794813 | 0.349 | 0.535 | 5.73E-09 | 2 Atp5j2        |
| 5.50E-13 | -0.39945098  | 0.198 | 0.372 | 7.25E-09 | 2 Arl6ip1       |
| 5.78E-13 | -0.45101488  | 0.154 | 0.318 | 7.63E-09 | 2 Hnrnpm        |
| 9.66E-13 | -0.355262997 | 0.368 | 0.548 | 1.27E-08 | 2 Atp5k         |
| 1.01E-12 | 0.388771822  | 0.568 | 0.47  | 1.34E-08 | 2 F630028O10Rik |
| 1.08E-12 | -0.370896497 | 0.241 | 0.42  | 1.43E-08 | 2 Uqcrq         |
| 1.65E-12 | -0.395964655 | 0.341 | 0.522 | 2.17E-08 | 2 Sec61b        |
| 1.77E-12 | -0.437153557 | 0.141 | 0.296 | 2.34E-08 | 2 Luc7l2        |
| 3.05E-12 | -0.426603871 | 0.143 | 0.299 | 4.02E-08 | 2 Clta          |
| 3.24E-12 | -0.436771285 | 0.129 | 0.28  | 4.27E-08 | 2 Ndufb9        |
| 5.28E-12 | -0.408571504 | 0.27  | 0.441 | 6.96E-08 | 2 Rbm3          |
| 7.32E-12 | -0.493410991 | 0.127 | 0.27  | 9.66E-08 | 2 Ucp2          |
| 7.63E-12 | -0.40176871  | 0.229 | 0.391 | 1.01E-07 | 2 Eif5a         |
| 1.05E-11 | -0.335560485 | 0.372 | 0.557 | 1.38E-07 | 2 Ubb           |
| 1.41E-11 | -0.395784585 | 0.135 | 0.285 | 1.86E-07 | 2 Atp5o         |
| 1.92E-11 | -0.392641752 | 0.168 | 0.324 | 2.53E-07 | 2 Arf5          |

|          |              |       |       |          |   |               |
|----------|--------------|-------|-------|----------|---|---------------|
| 2.23E-11 | -0.356526012 | 0.254 | 0.426 | 2.95E-07 | 2 | 2010107E04Rik |
| 2.57E-11 | -0.456444662 | 0.522 | 0.623 | 3.39E-07 | 2 | Ly6c2         |
| 2.64E-11 | -0.331309884 | 0.395 | 0.564 | 3.48E-07 | 2 | Cox6b1        |
| 3.05E-11 | -0.418328834 | 0.125 | 0.267 | 4.02E-07 | 2 | Atp5c1        |
| 3.08E-11 | -0.304947428 | 0.487 | 0.636 | 4.07E-07 | 2 | Cox6c         |
| 3.19E-11 | -0.502394581 | 0.119 | 0.253 | 4.20E-07 | 2 | Zfp36l2       |
| 3.78E-11 | -0.354315071 | 0.145 | 0.294 | 4.98E-07 | 2 | Atp5b         |
| 4.08E-11 | -0.381716246 | 0.118 | 0.258 | 5.38E-07 | 2 | Hnrnph1       |
| 4.88E-11 | -0.374459751 | 0.145 | 0.292 | 6.44E-07 | 2 | Anapc13       |
| 4.92E-11 | -0.517064766 | 0.131 | 0.265 | 6.49E-07 | 2 | Btg1          |
| 8.88E-11 | -0.342644241 | 0.158 | 0.312 | 1.17E-06 | 2 | Ost4          |
| 9.14E-11 | -0.314365464 | 0.356 | 0.528 | 1.21E-06 | 2 | Cox6a1        |
| 9.73E-11 | -0.396932255 | 0.158 | 0.303 | 1.28E-06 | 2 | Rsrp1         |
| 1.33E-10 | -0.358330832 | 0.127 | 0.267 | 1.75E-06 | 2 | Ndufb8        |
| 1.49E-10 | -0.361330484 | 0.2   | 0.35  | 1.97E-06 | 2 | Srsf3         |
| 1.59E-10 | 0.40801869   | 0.503 | 0.417 | 2.10E-06 | 2 | Tkt           |
| 3.23E-10 | -0.335405335 | 0.206 | 0.361 | 4.26E-06 | 2 | Cox7b         |
| 3.30E-10 | -0.404471561 | 0.229 | 0.377 | 4.36E-06 | 2 | Emp3          |
| 4.33E-10 | -0.345504285 | 0.241 | 0.398 | 5.71E-06 | 2 | Tmem258       |
| 5.80E-10 | -0.398379054 | 0.15  | 0.288 | 7.65E-06 | 2 | Reep5         |
| 6.58E-10 | -0.33024243  | 0.195 | 0.344 | 8.68E-06 | 2 | Lsm5          |
| 8.11E-10 | -0.344909011 | 0.171 | 0.319 | 1.07E-05 | 2 | Pcbp1         |
| 1.12E-09 | -0.359399952 | 0.164 | 0.302 | 1.47E-05 | 2 | D8Erttd738e   |
| 1.15E-09 | -0.340690785 | 0.135 | 0.268 | 1.52E-05 | 2 | Lsm6          |
| 1.27E-09 | 0.340896508  | 0.391 | 0.288 | 1.68E-05 | 2 | Cd24a         |
| 1.48E-09 | -0.395338071 | 0.204 | 0.345 | 1.95E-05 | 2 | 2810417H13Rik |
| 1.64E-09 | -0.346925743 | 0.164 | 0.299 | 2.16E-05 | 2 | Sdcbp         |
| 1.78E-09 | -0.364914305 | 0.168 | 0.305 | 2.34E-05 | 2 | Laptm5        |
| 2.34E-09 | -0.308234808 | 0.308 | 0.467 | 3.08E-05 | 2 | Uqcr10        |
| 2.50E-09 | -0.69865753  | 0.47  | 0.567 | 3.30E-05 | 2 | Ifitm3        |
| 3.83E-09 | -0.37071691  | 0.229 | 0.375 | 5.05E-05 | 2 | Serp1         |

|          |              |       |       |             |   |          |
|----------|--------------|-------|-------|-------------|---|----------|
| 4.59E-09 | -0.250529055 | 0.434 | 0.599 | 6.06E-05    | 2 | Gm26917  |
| 5.79E-09 | -0.314604269 | 0.145 | 0.273 | 7.64E-05    | 2 | Tmem167  |
| 7.52E-09 | -0.329008052 | 0.137 | 0.262 | 9.93E-05    | 2 | Ndufb2   |
| 8.69E-09 | -0.280369617 | 0.472 | 0.614 | 0.000114641 | 2 | Atp5e    |
| 9.01E-09 | -0.30460621  | 0.152 | 0.281 | 0.000118804 | 2 | Romo1    |
| 9.06E-09 | -0.263941588 | 0.308 | 0.471 | 0.000119555 | 2 | Dynll1   |
| 9.10E-09 | 0.426538846  | 0.347 | 0.256 | 0.000120015 | 2 | Ncf1     |
| 9.18E-09 | -0.300851479 | 0.173 | 0.312 | 0.000121046 | 2 | Sumo1    |
| 1.01E-08 | -0.355257268 | 0.216 | 0.347 | 0.00013262  | 2 | Clic1    |
| 1.48E-08 | -0.285721572 | 0.197 | 0.334 | 0.000194661 | 2 | Celf2    |
| 1.70E-08 | -0.272068546 | 0.173 | 0.309 | 0.00022468  | 2 | Ndufc1   |
| 1.82E-08 | -0.389673872 | 0.177 | 0.304 | 0.00024     | 2 | Sat1     |
| 2.21E-08 | -0.406155664 | 0.139 | 0.255 | 0.000291019 | 2 | Pgls     |
| 2.22E-08 | -0.28129489  | 0.137 | 0.263 | 0.000292852 | 2 | Timm13   |
| 2.26E-08 | 0.381743592  | 0.299 | 0.206 | 0.000297833 | 2 | C3       |
| 2.94E-08 | -0.352592325 | 0.775 | 0.819 | 0.000387824 | 2 | Tyrobp   |
| 3.17E-08 | -0.496034583 | 0.339 | 0.447 | 0.000418723 | 2 | Lgals3   |
| 3.47E-08 | -0.324037787 | 0.141 | 0.259 | 0.000458364 | 2 | Capzb    |
| 4.60E-08 | -0.288773376 | 0.143 | 0.261 | 0.000607022 | 2 | Ndufb3   |
| 5.74E-08 | -0.264741026 | 0.283 | 0.44  | 0.000757387 | 2 | Hnrnpk   |
| 5.82E-08 | 0.38619446   | 0.397 | 0.317 | 0.000767619 | 2 | Scp2     |
| 5.99E-08 | -0.298841354 | 0.156 | 0.279 | 0.00079066  | 2 | Tmed2    |
| 6.46E-08 | -0.256592501 | 0.362 | 0.506 | 0.000852064 | 2 | Pcbp2    |
| 8.39E-08 | -0.310753334 | 0.166 | 0.288 | 0.001107128 | 2 | Atp6v1g1 |
| 9.17E-08 | 0.381399984  | 0.335 | 0.251 | 0.001210074 | 2 | Lmo4     |
| 1.19E-07 | -0.279076116 | 0.175 | 0.297 | 0.001565129 | 2 | Tagln2   |
| 1.26E-07 | -0.338905735 | 0.152 | 0.265 | 0.001657727 | 2 | Wtap     |
| 1.27E-07 | -0.299812944 | 0.168 | 0.286 | 0.001681294 | 2 | Rac1     |
| 1.54E-07 | 0.37721266   | 0.351 | 0.268 | 0.002036439 | 2 | Aldh2    |
| 1.92E-07 | -0.262005689 | 0.303 | 0.447 | 0.002532879 | 2 | Rhoa     |
| 1.95E-07 | -0.286163459 | 0.141 | 0.253 | 0.002578717 | 2 | Scand1   |

|            |              |       |       |             |   |         |
|------------|--------------|-------|-------|-------------|---|---------|
| 2.15E-07   | -0.282869309 | 0.347 | 0.481 | 0.002839182 | 2 | Tceb2   |
| 3.01E-07   | -0.252730113 | 0.281 | 0.419 | 0.003973845 | 2 | Rbm39   |
| 3.70E-07   | -0.354088468 | 0.21  | 0.326 | 0.00488233  | 2 | Lsp1    |
| 4.22E-07   | -0.272664372 | 0.231 | 0.36  | 0.005566864 | 2 | Ndufa6  |
| 4.39E-07   | -0.262061968 | 0.291 | 0.423 | 0.005792959 | 2 | Chchd2  |
| 4.86E-07   | -0.278648521 | 0.241 | 0.37  | 0.006411085 | 2 | Gpx4    |
| 7.37E-07   | -0.268611145 | 0.25  | 0.378 | 0.009716223 | 2 | Capza2  |
| 9.04E-07   | -0.256061495 | 0.434 | 0.566 | 0.011920664 | 2 | Calm1   |
| 3.43E-06   | -0.293953124 | 0.162 | 0.264 | 0.045199135 | 2 | Vim     |
| 3.89E-06   | 0.449988981  | 0.326 | 0.264 | 0.051263355 | 2 | Gpi1    |
| 4.02E-06   | 0.262927411  | 0.497 | 0.44  | 0.053081321 | 2 | Gmfg    |
| 3.06E-05   | 0.263029604  | 0.509 | 0.46  | 0.404085936 | 2 | Rac2    |
| 7.99E-05   | 0.284912494  | 0.345 | 0.286 | 1           | 2 | Mgst1   |
| 0.00016437 | -0.29123952  | 0.237 | 0.323 | 1           | 2 | Ptprc   |
| 0.00110372 | 0.250066641  | 0.329 | 0.29  | 1           | 2 | Ppp1cb  |
| 0.00294072 | 0.264242895  | 0.295 | 0.255 | 1           | 2 | Gm10282 |
| 8.90E-209  | 1.272194119  | 0.996 | 0.606 | 1.17E-204   | 3 | Crip1   |
| 1.88E-206  | 1.21578877   | 0.998 | 0.717 | 2.48E-202   | 3 | Tmsb10  |
| 3.62E-205  | 1.343516778  | 0.733 | 0.165 | 4.77E-201   | 3 | Fn1     |
| 8.41E-189  | 1.266929418  | 0.728 | 0.177 | 1.11E-184   | 3 | F13a1   |
| 3.21E-165  | 1.134835622  | 0.759 | 0.214 | 4.23E-161   | 3 | Gm9844  |
| 4.42E-152  | 0.985677048  | 0.714 | 0.184 | 5.83E-148   | 3 | S100a4  |
| 2.79E-145  | 1.131271394  | 0.724 | 0.224 | 3.69E-141   | 3 | S100a10 |
| 5.40E-141  | 0.980534266  | 0.802 | 0.275 | 7.13E-137   | 3 | Ms4a6c  |
| 8.66E-138  | 0.977649283  | 0.897 | 0.399 | 1.14E-133   | 3 | Lgals3  |
| 7.71E-124  | 0.965902355  | 0.379 | 0.064 | 1.02E-119   | 3 | Klf4    |
| 1.05E-120  | 0.808468657  | 0.965 | 0.495 | 1.38E-116   | 3 | S100a6  |
| 5.11E-111  | 0.816140997  | 0.716 | 0.236 | 6.75E-107   | 3 | Ccr2    |
| 6.89E-94   | 0.754651824  | 0.881 | 0.443 | 9.09E-90    | 3 | Lgals1  |
| 3.98E-93   | 0.720956578  | 0.93  | 0.587 | 5.25E-89    | 3 | Ly6c2   |
| 4.51E-92   | 0.884134568  | 0.412 | 0.098 | 5.94E-88    | 3 | Ifi30   |

**Mono**

|          |              |       |       |          |             |
|----------|--------------|-------|-------|----------|-------------|
| 4.89E-91 | 0.680412455  | 0.914 | 0.511 | 6.45E-87 | 3 Psap      |
| 1.63E-89 | 0.645704488  | 0.942 | 0.605 | 2.15E-85 | 3 Cst3      |
| 4.70E-88 | 0.9354591    | 0.346 | 0.076 | 6.20E-84 | 3 C1galt1c1 |
| 8.52E-88 | 0.625854057  | 0.926 | 0.527 | 1.12E-83 | 3 Ifitm3    |
| 1.47E-87 | 0.857579095  | 0.802 | 0.396 | 1.94E-83 | 3 Prdx1     |
| 1.59E-77 | 0.762035049  | 0.554 | 0.183 | 2.10E-73 | 3 Ahnak     |
| 7.55E-72 | 0.520524757  | 0.981 | 0.807 | 9.96E-68 | 3 Ftl1      |
| 8.36E-69 | 0.725747471  | 0.78  | 0.42  | 1.10E-64 | 3 Psma7     |
| 1.96E-68 | 0.790044478  | 0.58  | 0.229 | 2.59E-64 | 3 Cebpb     |
| 1.09E-65 | 0.707926423  | 0.362 | 0.1   | 1.44E-61 | 3 Tpm4      |
| 3.16E-64 | 0.604620742  | 0.922 | 0.767 | 4.16E-60 | 3 Hmgb2     |
| 4.37E-64 | 0.778920563  | 0.397 | 0.122 | 5.77E-60 | 3 Anxa5     |
| 2.87E-63 | 0.722867743  | 0.372 | 0.107 | 3.79E-59 | 3 Ctsc      |
| 3.05E-62 | 0.702524394  | 0.704 | 0.329 | 4.02E-58 | 3 Ifi27l2a  |
| 7.01E-62 | 0.674567415  | 0.735 | 0.374 | 9.25E-58 | 3 Dbi       |
| 1.02E-61 | 0.73148856   | 0.566 | 0.229 | 1.34E-57 | 3 Vim       |
| 7.02E-61 | 0.597694834  | 0.449 | 0.145 | 9.26E-57 | 3 Pld4      |
| 1.31E-60 | 0.501162852  | 0.957 | 0.808 | 1.73E-56 | 3 H2afz     |
| 8.52E-60 | 0.759277507  | 0.471 | 0.172 | 1.12E-55 | 3 Emb       |
| 1.27E-58 | -2.159276478 | 0.994 | 0.994 | 1.67E-54 | 3 S100a9    |
| 1.37E-58 | 0.584089366  | 0.802 | 0.44  | 1.81E-54 | 3 Ly6e      |
| 3.91E-57 | -2.053864532 | 1     | 0.999 | 5.16E-53 | 3 S100a8    |
| 2.97E-56 | -2.036224071 | 0.418 | 0.648 | 3.92E-52 | 3 Wfdc21    |
| 3.06E-56 | 0.575084515  | 0.313 | 0.083 | 4.03E-52 | 3 Ms4a4c    |
| 3.96E-56 | 0.488079148  | 0.949 | 0.779 | 5.23E-52 | 3 Ppia      |
| 2.70E-54 | -2.121989207 | 0.922 | 0.932 | 3.56E-50 | 3 Camp      |
| 2.48E-53 | 0.646583271  | 0.387 | 0.129 | 3.27E-49 | 3 Cd48      |
| 1.69E-52 | -1.746209111 | 0.156 | 0.473 | 2.23E-48 | 3 Pglyrp1   |
| 2.15E-52 | 0.412349773  | 0.996 | 0.898 | 2.83E-48 | 3 Lyz2      |
| 5.68E-51 | 0.703945139  | 0.56  | 0.261 | 7.49E-47 | 3 Tmpo      |
| 2.35E-48 | -2.164141127 | 0.792 | 0.854 | 3.10E-44 | 3 Ngp       |

|          |              |       |       |          |          |
|----------|--------------|-------|-------|----------|----------|
| 2.05E-47 | 0.657636377  | 0.298 | 0.088 | 2.70E-43 | 3 Rassf4 |
| 4.89E-47 | 0.664540331  | 0.634 | 0.344 | 6.46E-43 | 3 Tuba1b |
| 2.04E-46 | -1.904173032 | 0.321 | 0.56  | 2.69E-42 | 3 Ltf    |
| 9.65E-45 | 0.424108214  | 0.942 | 0.76  | 1.27E-40 | 3 H3f3a  |
| 1.41E-44 | 0.641891509  | 0.366 | 0.129 | 1.86E-40 | 3 Capg   |
| 2.26E-43 | 0.285366554  | 1     | 0.995 | 2.98E-39 | 3 Tmsb4x |
| 4.05E-43 | -1.929418682 | 0.37  | 0.574 | 5.35E-39 | 3 Lcn2   |
| 1.15E-42 | 0.566939606  | 0.496 | 0.217 | 1.51E-38 | 3 Pycard |
| 1.22E-42 | 0.608070138  | 0.453 | 0.189 | 1.61E-38 | 3 Lamp1  |
| 1.07E-41 | 0.406740981  | 0.926 | 0.687 | 1.41E-37 | 3 Sub1   |
| 1.70E-41 | 0.430778435  | 0.891 | 0.673 | 2.25E-37 | 3 Hmgb1  |
| 2.64E-41 | 0.657283408  | 0.405 | 0.165 | 3.48E-37 | 3 Fam96a |
| 5.96E-41 | 0.576003138  | 0.514 | 0.234 | 7.86E-37 | 3 Anxa2  |
| 4.31E-40 | 0.341200217  | 0.967 | 0.802 | 5.69E-36 | 3 Tyrobp |
| 6.39E-40 | 0.55214556   | 0.482 | 0.215 | 8.43E-36 | 3 Zeb2   |
| 1.69E-39 | 0.417465042  | 0.928 | 0.729 | 2.23E-35 | 3 Gpx1   |
| 3.39E-39 | 0.470204927  | 0.885 | 0.669 | 4.48E-35 | 3 Actg1  |
| 1.60E-38 | 0.556548751  | 0.508 | 0.237 | 2.11E-34 | 3 Ucp2   |
| 2.47E-38 | 0.54617089   | 0.681 | 0.404 | 3.26E-34 | 3 Hint1  |
| 1.30E-37 | 0.527092052  | 0.634 | 0.342 | 1.72E-33 | 3 Emp3   |
| 1.90E-37 | 0.355049814  | 0.973 | 0.831 | 2.51E-33 | 3 Ptma   |
| 2.18E-37 | 0.438705682  | 0.409 | 0.163 | 2.88E-33 | 3 Ccl6   |
| 7.77E-37 | 0.538577501  | 0.772 | 0.515 | 1.03E-32 | 3 Mrpl33 |
| 8.82E-37 | 0.648657917  | 0.348 | 0.138 | 1.16E-32 | 3 Cstb   |
| 1.98E-36 | 0.457595247  | 0.593 | 0.299 | 2.61E-32 | 3 Npc2   |
| 4.23E-36 | 0.474063266  | 0.796 | 0.535 | 5.58E-32 | 3 Calm1  |
| 4.54E-36 | 0.706549714  | 0.28  | 0.1   | 5.99E-32 | 3 Kpna2  |
| 5.37E-36 | 0.531291889  | 0.296 | 0.103 | 7.08E-32 | 3 Ap1s2  |
| 1.00E-35 | 0.570005774  | 0.615 | 0.355 | 1.32E-31 | 3 H2afv  |
| 1.29E-35 | 0.543611431  | 0.274 | 0.094 | 1.71E-31 | 3 Tifab  |
| 1.37E-34 | 0.562284114  | 0.508 | 0.257 | 1.81E-30 | 3 Reep5  |



|          |             |       |       |          |                 |
|----------|-------------|-------|-------|----------|-----------------|
| 4.30E-34 | 0.57402988  | 0.541 | 0.299 | 5.67E-30 | 3 Top2a         |
| 1.62E-33 | 0.694397112 | 0.358 | 0.157 | 2.14E-29 | 3 Cenpa         |
| 1.98E-33 | 0.351285518 | 0.907 | 0.698 | 2.61E-29 | 3 Fcer1g        |
| 2.75E-32 | 0.492116846 | 0.681 | 0.405 | 3.63E-28 | 3 Rbm3          |
| 4.05E-32 | 0.553196664 | 0.325 | 0.132 | 5.35E-28 | 3 Sod1          |
| 6.36E-32 | 0.528421679 | 0.57  | 0.317 | 8.39E-28 | 3 Clic1         |
| 2.41E-30 | 0.444457123 | 0.422 | 0.193 | 3.18E-26 | 3 Grn           |
| 2.54E-30 | 0.447982476 | 0.774 | 0.525 | 3.35E-26 | 3 Hspa8         |
| 3.57E-30 | 0.450731901 | 0.403 | 0.178 | 4.71E-26 | 3 Mpeg1         |
| 8.22E-30 | 0.548870244 | 0.551 | 0.315 | 1.08E-25 | 3 2810417H13Rik |
| 4.23E-29 | 0.471740402 | 0.35  | 0.15  | 5.58E-25 | 3 Napsa         |
| 5.56E-29 | 0.512710793 | 0.687 | 0.481 | 7.33E-25 | 3 Tubb5         |
| 2.52E-28 | 0.452086299 | 0.547 | 0.299 | 3.33E-24 | 3 Gm10116       |
| 3.49E-28 | 0.455825037 | 0.34  | 0.145 | 4.60E-24 | 3 Prkcd         |
| 4.04E-28 | 0.450912656 | 0.325 | 0.134 | 5.33E-24 | 3 Tpd52         |
| 5.77E-28 | 0.289420491 | 0.422 | 0.188 | 7.61E-24 | 3 Ctss          |
| 1.31E-27 | 0.512471252 | 0.64  | 0.414 | 1.73E-23 | 3 Tspo          |
| 1.86E-26 | 0.379098104 | 0.739 | 0.509 | 2.45E-22 | 3 Coro1a        |
| 2.34E-26 | 0.531660344 | 0.401 | 0.201 | 3.08E-22 | 3 Mki67         |
| 2.67E-26 | 0.461696911 | 0.545 | 0.318 | 3.52E-22 | 3 Nucks1        |
| 1.06E-25 | 0.468765092 | 0.267 | 0.106 | 1.39E-21 | 3 Soat1         |
| 1.07E-25 | 0.376134916 | 0.551 | 0.296 | 1.41E-21 | 3 Lsp1          |
| 1.44E-25 | 0.580014792 | 0.549 | 0.342 | 1.90E-21 | 3 Arl6ip1       |
| 1.80E-25 | 0.433925905 | 0.506 | 0.276 | 2.37E-21 | 3 Sat1          |
| 5.41E-25 | 0.488955013 | 0.358 | 0.17  | 7.14E-21 | 3 Rbms1         |
| 6.30E-25 | 0.454982991 | 0.399 | 0.2   | 8.31E-21 | 3 Erp29         |
| 7.55E-25 | 0.488123868 | 0.27  | 0.11  | 9.96E-21 | 3 Ccl9          |
| 1.64E-24 | 0.418032985 | 0.689 | 0.449 | 2.16E-20 | 3 Cox5b         |
| 3.92E-24 | 0.478378958 | 0.409 | 0.215 | 5.17E-20 | 3 Hn1           |
| 6.46E-24 | 0.428192907 | 0.597 | 0.372 | 8.52E-20 | 3 Smdt1         |
| 2.50E-23 | 0.684866887 | 0.543 | 0.371 | 3.30E-19 | 3 Hist1h2ap     |

|          |             |       |       |          |             |
|----------|-------------|-------|-------|----------|-------------|
| 2.64E-23 | 0.431889138 | 0.304 | 0.135 | 3.49E-19 | 3 Pitpna    |
| 3.27E-23 | 0.448993419 | 0.309 | 0.144 | 4.31E-19 | 3 Lmnb1     |
| 4.77E-23 | 0.435420758 | 0.469 | 0.26  | 6.29E-19 | 3 Rac1      |
| 6.46E-23 | 0.451876332 | 0.317 | 0.15  | 8.53E-19 | 3 H2afx     |
| 8.00E-23 | 0.36712005  | 0.409 | 0.204 | 1.06E-18 | 3 Gm2a      |
| 8.59E-23 | 0.539264754 | 0.329 | 0.16  | 1.13E-18 | 3 Creg1     |
| 1.24E-22 | 0.429773665 | 0.35  | 0.168 | 1.63E-18 | 3 Kctd12    |
| 1.58E-22 | 0.504503163 | 0.368 | 0.192 | 2.09E-18 | 3 Birc5     |
| 1.91E-22 | 0.379604859 | 0.432 | 0.223 | 2.52E-18 | 3 Slfn2     |
| 2.52E-22 | 0.480277709 | 0.27  | 0.12  | 3.32E-18 | 3 Hist1h2ae |
| 3.55E-22 | 0.326524473 | 0.86  | 0.678 | 4.68E-18 | 3 Sh3bgrl3  |
| 3.80E-22 | 0.372915269 | 0.704 | 0.471 | 5.01E-18 | 3 Arpc2     |
| 4.06E-22 | 0.396073177 | 0.743 | 0.544 | 5.36E-18 | 3 Calm2     |
| 4.59E-22 | 0.32168532  | 0.854 | 0.631 | 6.06E-18 | 3 Atp5l     |
| 9.96E-22 | 0.49550574  | 0.407 | 0.225 | 1.31E-17 | 3 Cks1b     |
| 4.39E-21 | 0.420421668 | 0.527 | 0.318 | 5.79E-17 | 3 Pomp      |
| 5.66E-21 | 0.447641557 | 0.407 | 0.226 | 7.46E-17 | 3 Ube2s     |
| 8.14E-21 | 0.423447002 | 0.521 | 0.317 | 1.07E-16 | 3 Notch2    |
| 9.33E-21 | 0.364888468 | 0.741 | 0.501 | 1.23E-16 | 3 Atp5j2    |
| 1.10E-20 | 0.365132116 | 0.422 | 0.225 | 1.45E-16 | 3 Msn       |
| 1.40E-20 | 0.30752346  | 0.877 | 0.701 | 1.84E-16 | 3 Cfl1      |
| 3.20E-20 | 0.335877786 | 0.57  | 0.346 | 4.22E-16 | 3 Lst1      |
| 3.56E-20 | 0.401042013 | 0.508 | 0.308 | 4.69E-16 | 3 Slc25a5   |
| 4.75E-20 | 0.347641127 | 0.395 | 0.205 | 6.27E-16 | 3 Selplg    |
| 5.45E-20 | 0.438881775 | 0.298 | 0.143 | 7.19E-16 | 3 Akr1a1    |
| 5.62E-20 | 0.404733788 | 0.393 | 0.211 | 7.41E-16 | 3 Fam111a   |
| 6.10E-20 | 0.502639446 | 0.302 | 0.149 | 8.05E-16 | 3 Nusap1    |
| 6.24E-20 | 0.400564421 | 0.56  | 0.345 | 8.24E-16 | 3 BC005537  |
| 7.12E-20 | 0.358445017 | 0.605 | 0.396 | 9.39E-16 | 3 Stmn1     |
| 8.37E-20 | 0.274686535 | 0.868 | 0.695 | 1.10E-15 | 3 Myl6      |
| 1.22E-19 | 0.53504088  | 0.292 | 0.144 | 1.61E-15 | 3 Ube2c     |

|          |             |       |       |          |           |
|----------|-------------|-------|-------|----------|-----------|
| 1.70E-19 | 0.437487153 | 0.36  | 0.19  | 2.24E-15 | 3 Arhgdia |
| 1.90E-19 | 0.358214536 | 0.568 | 0.35  | 2.51E-15 | 3 Capza2  |
| 2.12E-19 | 0.445708948 | 0.251 | 0.111 | 2.79E-15 | 3 Smpdl3a |
| 2.16E-19 | 0.403862244 | 0.362 | 0.191 | 2.85E-15 | 3 Cmpk1   |
| 3.24E-19 | 0.410703597 | 0.333 | 0.173 | 4.27E-15 | 3 Gm11273 |
| 7.02E-19 | 0.377062527 | 0.551 | 0.352 | 9.26E-15 | 3 Dek     |
| 7.26E-19 | 0.280532543 | 0.877 | 0.693 | 9.58E-15 | 3 Tpt1    |
| 9.74E-19 | 0.393104997 | 0.315 | 0.158 | 1.28E-14 | 3 Ethe1   |
| 1.02E-18 | 0.369825979 | 0.422 | 0.234 | 1.34E-14 | 3 Capzb   |
| 1.30E-18 | 0.349259788 | 0.669 | 0.462 | 1.72E-14 | 3 Morf4l1 |
| 1.31E-18 | 0.349471561 | 0.648 | 0.427 | 1.73E-14 | 3 Arpc1b  |
| 1.37E-18 | 0.414756106 | 0.502 | 0.317 | 1.81E-14 | 3 Lsm5    |
| 1.86E-18 | 0.410249184 | 0.457 | 0.272 | 2.46E-14 | 3 Tagln2  |
| 2.04E-18 | 0.372340491 | 0.543 | 0.339 | 2.69E-14 | 3 Fam49b  |
| 4.77E-18 | 0.335505155 | 0.72  | 0.518 | 6.30E-14 | 3 Atp5k   |
| 4.77E-18 | 0.332029786 | 0.607 | 0.401 | 6.30E-14 | 3 Cdc42   |
| 5.46E-18 | 0.410103027 | 0.323 | 0.17  | 7.21E-14 | 3 Tubb4b  |
| 5.55E-18 | 0.353360857 | 0.593 | 0.381 | 7.32E-14 | 3 Actr3   |
| 1.30E-17 | 0.408367001 | 0.342 | 0.181 | 1.72E-13 | 3 Klf13   |
| 1.31E-17 | 0.327280673 | 0.603 | 0.395 | 1.73E-13 | 3 Atox1   |
| 1.98E-17 | 0.287952939 | 0.84  | 0.65  | 2.61E-13 | 3 Cox4i1  |
| 1.49E-16 | 0.366555903 | 0.329 | 0.177 | 1.97E-12 | 3 Psmb2   |
| 1.55E-16 | 0.306987677 | 0.685 | 0.459 | 2.05E-12 | 3 Rps27l  |
| 2.44E-16 | 0.311923076 | 0.422 | 0.241 | 3.22E-12 | 3 Flna    |
| 2.52E-16 | 0.377113018 | 0.449 | 0.28  | 3.33E-12 | 3 Nap1l1  |
| 3.78E-16 | 0.363323911 | 0.547 | 0.359 | 4.98E-12 | 3 Tmem256 |
| 4.08E-16 | 0.334470665 | 0.255 | 0.121 | 5.39E-12 | 3 Ifi203  |
| 4.53E-16 | 0.377202591 | 0.27  | 0.135 | 5.97E-12 | 3 App     |
| 6.58E-16 | 0.333384689 | 0.58  | 0.393 | 8.68E-12 | 3 Anp32b  |
| 8.63E-16 | 0.377957663 | 0.282 | 0.146 | 1.14E-11 | 3 Sdhd    |
| 1.51E-15 | 0.373599024 | 0.416 | 0.249 | 1.99E-11 | 3 Tmem167 |

|          |              |       |       |          |                 |
|----------|--------------|-------|-------|----------|-----------------|
| 1.88E-15 | 0.326611702  | 0.685 | 0.507 | 2.48E-11 | 3 Atp5h         |
| 2.36E-15 | 0.357839757  | 0.292 | 0.151 | 3.11E-11 | 3 Ctsz          |
| 3.04E-15 | 0.384702858  | 0.399 | 0.238 | 4.01E-11 | 3 Ndufb3        |
| 4.82E-15 | 0.344835413  | 0.531 | 0.351 | 6.35E-11 | 3 Ran           |
| 5.77E-15 | 0.270562961  | 0.405 | 0.231 | 7.62E-11 | 3 Fxyd5         |
| 6.17E-15 | -0.829198272 | 0.319 | 0.439 | 8.13E-11 | 3 Anxa1         |
| 6.96E-15 | 0.312635489  | 0.712 | 0.537 | 9.17E-11 | 3 Cox6b1        |
| 6.99E-15 | 0.292982879  | 0.428 | 0.252 | 9.22E-11 | 3 Cotl1         |
| 8.98E-15 | 0.283049294  | 0.745 | 0.553 | 1.18E-10 | 3 Hnrnpa2b1     |
| 1.31E-14 | 0.359291486  | 0.44  | 0.274 | 1.73E-10 | 3 Clta          |
| 2.18E-14 | 0.319876044  | 0.374 | 0.217 | 2.88E-10 | 3 Rrbp1         |
| 2.28E-14 | 0.274592391  | 0.669 | 0.474 | 3.00E-10 | 3 Gnai2         |
| 4.08E-14 | 0.332443858  | 0.403 | 0.243 | 5.38E-10 | 3 Atp5c1        |
| 4.33E-14 | 0.314696326  | 0.609 | 0.444 | 5.71E-10 | 3 Dynll1        |
| 4.35E-14 | 0.413391228  | 0.342 | 0.203 | 5.74E-10 | 3 Rad21         |
| 9.81E-14 | 0.308409773  | 0.368 | 0.218 | 1.29E-09 | 3 Sptssa        |
| 1.25E-13 | 0.335142358  | 0.389 | 0.238 | 1.65E-09 | 3 Psmb3         |
| 1.27E-13 | 0.306253533  | 0.282 | 0.151 | 1.68E-09 | 3 Gm8797        |
| 1.31E-13 | 0.304770716  | 0.251 | 0.127 | 1.73E-09 | 3 Stx7          |
| 1.45E-13 | 0.307811295  | 0.259 | 0.134 | 1.92E-09 | 3 Bri3          |
| 1.83E-13 | 0.337492355  | 0.364 | 0.218 | 2.41E-09 | 3 Csnk1a1       |
| 2.17E-13 | 0.310161098  | 0.267 | 0.142 | 2.86E-09 | 3 Dock10        |
| 2.27E-13 | 0.279609093  | 0.687 | 0.499 | 2.99E-09 | 3 Cox6a1        |
| 2.73E-13 | 0.298152904  | 0.617 | 0.436 | 3.60E-09 | 3 Hnrnpa3       |
| 3.06E-13 | 0.316508251  | 0.251 | 0.13  | 4.03E-09 | 3 Esd           |
| 4.01E-13 | 0.321547242  | 0.671 | 0.531 | 5.30E-09 | 3 Ubb           |
| 6.41E-13 | 0.336003958  | 0.327 | 0.19  | 8.45E-09 | 3 Ndufb5        |
| 6.60E-13 | 0.318424941  | 0.516 | 0.351 | 8.71E-09 | 3 Arpc3         |
| 6.67E-13 | 0.374904243  | 0.307 | 0.179 | 8.80E-09 | 3 2700094K13Rik |
| 7.17E-13 | 0.294456131  | 0.426 | 0.265 | 9.46E-09 | 3 Iqgap1        |
| 7.76E-13 | 0.2818405    | 0.461 | 0.293 | 1.02E-08 | 3 Polr2l        |

|          |              |       |       |          |           |
|----------|--------------|-------|-------|----------|-----------|
| 7.98E-13 | 0.328493544  | 0.261 | 0.141 | 1.05E-08 | 3 Uqcrfs1 |
| 8.42E-13 | 0.267671065  | 0.743 | 0.559 | 1.11E-08 | 3 Rpl36a1 |
| 9.51E-13 | 0.300004591  | 0.385 | 0.234 | 1.25E-08 | 3 S100a13 |
| 9.77E-13 | 0.270653987  | 0.589 | 0.418 | 1.29E-08 | 3 Serinc3 |
| 1.01E-12 | 0.254604346  | 0.79  | 0.61  | 1.33E-08 | 3 Cox6c   |
| 1.47E-12 | 0.276383257  | 0.636 | 0.456 | 1.93E-08 | 3 Tceb2   |
| 1.70E-12 | 0.326657217  | 0.321 | 0.188 | 2.24E-08 | 3 Tmco1   |
| 2.06E-12 | 0.25388427   | 0.512 | 0.34  | 2.72E-08 | 3 Atp6v0e |
| 2.44E-12 | 0.266975005  | 0.385 | 0.237 | 3.22E-08 | 3 Sec11c  |
| 2.82E-12 | -0.72736048  | 0.179 | 0.306 | 3.72E-08 | 3 Cd24a   |
| 3.04E-12 | -0.403118197 | 1     | 0.997 | 4.01E-08 | 3 Malat1  |
| 3.72E-12 | 0.320890004  | 0.409 | 0.261 | 4.91E-08 | 3 Atp5o   |
| 4.72E-12 | 0.250401907  | 0.718 | 0.545 | 6.22E-08 | 3 Ndufa3  |
| 6.40E-12 | 0.281238034  | 0.278 | 0.156 | 8.45E-08 | 3 Ube2l3  |
| 6.83E-12 | 0.256412155  | 0.366 | 0.218 | 9.01E-08 | 3 Sell    |
| 1.14E-11 | 0.268329674  | 0.564 | 0.391 | 1.51E-07 | 3 Ndufa13 |
| 1.29E-11 | 0.357644409  | 0.346 | 0.22  | 1.70E-07 | 3 Anp32e  |
| 1.42E-11 | 0.300667693  | 0.276 | 0.156 | 1.87E-07 | 3 Sh3bgrl |
| 2.73E-11 | 0.269555812  | 0.352 | 0.213 | 3.60E-07 | 3 Psme2   |
| 2.89E-11 | -0.666880968 | 0.496 | 0.557 | 3.81E-07 | 3 Chil3   |
| 2.99E-11 | 0.299950967  | 0.348 | 0.214 | 3.95E-07 | 3 Ptpn6   |
| 3.32E-11 | 0.280558951  | 0.498 | 0.336 | 4.38E-07 | 3 Cox7b   |
| 4.96E-11 | 0.277763761  | 0.348 | 0.216 | 6.54E-07 | 3 Cxcr4   |
| 6.54E-11 | 0.282321977  | 0.337 | 0.207 | 8.63E-07 | 3 Tmed10  |
| 7.79E-11 | 0.273156509  | 0.449 | 0.301 | 1.03E-06 | 3 Cycs    |
| 1.24E-10 | 0.286420726  | 0.259 | 0.148 | 1.64E-06 | 3 Brk1    |
| 2.16E-10 | 0.264633349  | 0.539 | 0.379 | 2.85E-06 | 3 Gm8186  |
| 2.32E-10 | 0.293069173  | 0.411 | 0.276 | 3.06E-06 | 3 Psmb1   |
| 2.34E-10 | 0.260756263  | 0.477 | 0.326 | 3.09E-06 | 3 Srsf3   |
| 2.45E-10 | 0.314056745  | 0.313 | 0.191 | 3.23E-06 | 3 Ccdc12  |
| 3.00E-10 | 0.312053182  | 0.302 | 0.185 | 3.96E-06 | 3 Chmp2a  |

|          |              |       |       |             |           |
|----------|--------------|-------|-------|-------------|-----------|
| 3.70E-10 | 0.29292324   | 0.412 | 0.275 | 4.89E-06    | 3 Eif4a1  |
| 4.36E-10 | 0.276620167  | 0.327 | 0.202 | 5.75E-06    | 3 Lamp2   |
| 6.21E-10 | 0.292186268  | 0.315 | 0.199 | 8.19E-06    | 3 Hnrnpd  |
| 9.64E-10 | 0.262185082  | 0.424 | 0.29  | 1.27E-05    | 3 Sumo1   |
| 1.08E-09 | 0.291692901  | 0.331 | 0.214 | 1.43E-05    | 3 Snrpd1  |
| 1.11E-09 | 0.267233423  | 0.463 | 0.324 | 1.47E-05    | 3 Cox5a   |
| 1.14E-09 | 0.257698899  | 0.374 | 0.244 | 1.50E-05    | 3 Tln1    |
| 1.56E-09 | 0.274045717  | 0.545 | 0.394 | 2.06E-05    | 3 Uqcrq   |
| 1.81E-09 | 0.266344967  | 0.37  | 0.246 | 2.39E-05    | 3 Ndufb8  |
| 2.16E-09 | 0.284060687  | 0.319 | 0.202 | 2.85E-05    | 3 Psmb6   |
| 2.81E-09 | 0.289017278  | 0.333 | 0.215 | 3.71E-05    | 3 Frg1    |
| 2.87E-09 | 0.278567053  | 0.325 | 0.211 | 3.78E-05    | 3 Gm10250 |
| 3.46E-09 | 0.292932525  | 0.263 | 0.16  | 4.57E-05    | 3 Higd1a  |
| 3.98E-09 | 0.255918586  | 0.3   | 0.187 | 5.25E-05    | 3 Eno1    |
| 4.33E-09 | 0.266585492  | 0.311 | 0.198 | 5.71E-05    | 3 Ppib    |
| 4.55E-09 | 0.260700815  | 0.356 | 0.234 | 6.00E-05    | 3 Atp5f1  |
| 4.99E-09 | 0.261270276  | 0.389 | 0.262 | 6.58E-05    | 3 Gabarap |
| 5.22E-09 | 0.268778658  | 0.296 | 0.188 | 6.89E-05    | 3 Smc4    |
| 5.26E-09 | 0.263079273  | 0.368 | 0.247 | 6.93E-05    | 3 Alyref  |
| 7.28E-09 | 0.257328612  | 0.333 | 0.22  | 9.61E-05    | 3 Smc2    |
| 7.51E-09 | 0.259957241  | 0.265 | 0.16  | 9.91E-05    | 3 Gdi2    |
| 7.73E-09 | 0.256627723  | 0.327 | 0.212 | 0.000101947 | 3 Sf3b6   |
| 1.24E-08 | -0.805226608 | 0.29  | 0.366 | 0.000163455 | 3 Ifitm6  |
| 1.27E-08 | 0.255589185  | 0.375 | 0.255 | 0.000167744 | 3 Snrpb   |
| 1.61E-08 | 0.281332707  | 0.298 | 0.194 | 0.000212267 | 3 Ndufb4  |
| 1.81E-08 | 0.255928034  | 0.323 | 0.214 | 0.000239182 | 3 Ndufc2  |
| 2.52E-08 | 0.257261543  | 0.44  | 0.316 | 0.000332877 | 3 Cks2    |
| 2.66E-08 | 0.260564982  | 0.364 | 0.245 | 0.000350478 | 3 Ndufs5  |
| 6.47E-08 | 0.278440134  | 0.34  | 0.237 | 0.000852865 | 3 Srp9    |
| 1.25E-07 | 0.282015795  | 0.261 | 0.169 | 0.001653733 | 3 Mrpl23  |
| 1.35E-07 | 0.251134087  | 0.253 | 0.162 | 0.001775013 | 3 Znhit1  |

|            |              |       |       |             |   |          |
|------------|--------------|-------|-------|-------------|---|----------|
| 6.39E-07   | 0.256831201  | 0.35  | 0.251 | 0.00843065  | 3 | Aprt     |
| 3.37E-06   | -0.327016739 | 0.401 | 0.472 | 0.044487918 | 3 | Cd47     |
| 1.83E-05   | -0.519646744 | 0.628 | 0.584 | 0.241616377 | 3 | Hmgn2    |
| 3.73E-05   | -0.999671279 | 0.222 | 0.274 | 0.491648179 | 3 | Mpo      |
| 4.52E-05   | -0.961078991 | 0.44  | 0.48  | 0.596561762 | 3 | Retnlg   |
| 8.93E-05   | -0.421638665 | 0.206 | 0.268 | 1           | 3 | Ncf1     |
| 0.00013995 | -0.504398112 | 0.243 | 0.299 | 1           | 3 | Pdcd4    |
| 0.00034842 | -0.382624585 | 0.204 | 0.262 | 1           | 3 | Gm10282  |
| 0.00098323 | -0.424717838 | 0.214 | 0.259 | 1           | 3 | Ncl      |
| 0.00154921 | -0.299506903 | 0.393 | 0.426 | 1           | 3 | Tkt      |
| 0.00864545 | -0.275943882 | 0.304 | 0.335 | 1           | 3 | Clec12a  |
| 2.48E-216  | 1.72733359   | 0.739 | 0.18  | 3.27E-212   | 4 | Wfdc17   |
| 1.57E-204  | 1.398504881  | 0.971 | 0.525 | 2.07E-200   | 4 | Ifitm3   |
| 2.41E-200  | 1.141840852  | 0.998 | 0.898 | 3.17E-196   | 4 | Lyz2     |
| 1.23E-150  | 1.380016697  | 0.661 | 0.191 | 1.62E-146   | 4 | S100a4   |
| 7.48E-150  | 1.51380445   | 0.586 | 0.15  | 9.86E-146   | 4 | Ccl6     |
| 2.01E-149  | 1.386322797  | 0.71  | 0.238 | 2.66E-145   | 4 | Ccr2     |
| 1.97E-148  | 1.031500168  | 0.994 | 0.719 | 2.60E-144   | 4 | Tmsb10   |
| 1.49E-146  | 1.418049295  | 0.627 | 0.176 | 1.97E-142   | 4 | Fn1      |
| 8.62E-142  | 1.087851478  | 0.922 | 0.5   | 1.14E-137   | 4 | S100a6   |
| 1.17E-138  | 1.012781813  | 0.976 | 0.609 | 1.55E-134   | 4 | Crip1    |
| 7.99E-135  | 1.280393472  | 0.784 | 0.324 | 1.05E-130   | 4 | Ifi2712a |
| 8.55E-119  | 1.131144947  | 0.814 | 0.408 | 1.13E-114   | 4 | Lgals3   |
| 4.76E-110  | 1.241425564  | 0.565 | 0.177 | 6.28E-106   | 4 | Ctss     |
| 4.91E-108  | 0.782338955  | 0.967 | 0.809 | 6.48E-104   | 4 | Ftl1     |
| 2.24E-101  | 0.910625544  | 0.876 | 0.516 | 2.95E-97    | 4 | Psap     |
| 3.00E-91   | 1.135219125  | 0.549 | 0.194 | 3.96E-87    | 4 | F13a1    |
| 2.31E-89   | 1.040144354  | 0.667 | 0.288 | 3.05E-85    | 4 | Ms4a6c   |
| 6.90E-88   | 0.799897511  | 0.88  | 0.612 | 9.10E-84    | 4 | Cst3     |
| 9.35E-81   | 0.683424444  | 0.945 | 0.804 | 1.23E-76    | 4 | Tyrobp   |
| 1.91E-80   | -1.6008558   | 0.157 | 0.623 | 2.51E-76    | 4 | Hmgn2    |

**Mono**

|          |              |       |       |          |             |
|----------|--------------|-------|-------|----------|-------------|
| 1.02E-72 | 1.071967348  | 0.504 | 0.188 | 1.35E-68 | 4 Ahnak     |
| 1.42E-72 | 0.700651905  | 0.892 | 0.7   | 1.87E-68 | 4 Fcer1g    |
| 3.85E-69 | 0.372706565  | 1     | 0.995 | 5.08E-65 | 4 Tmsb4x    |
| 5.32E-64 | 1.141822386  | 0.28  | 0.068 | 7.02E-60 | 4 Cx3cr1    |
| 3.12E-63 | 0.980502584  | 0.537 | 0.234 | 4.12E-59 | 4 Gm9844    |
| 2.41E-62 | -2.03121254  | 0.21  | 0.587 | 3.18E-58 | 4 Lcn2      |
| 1.78E-60 | -1.974075458 | 0.312 | 0.656 | 2.35E-56 | 4 Wfdc21    |
| 2.73E-58 | 1.059710984  | 0.304 | 0.085 | 3.60E-54 | 4 Ms4a4c    |
| 5.68E-53 | 1.046826207  | 0.327 | 0.106 | 7.50E-49 | 4 Ccl9      |
| 6.85E-53 | 1.052218898  | 0.473 | 0.216 | 9.03E-49 | 4 Zeb2      |
| 3.92E-51 | 1.01205845   | 0.294 | 0.089 | 5.17E-47 | 4 Ms4a6b    |
| 6.76E-51 | -2.188775019 | 0.659 | 0.865 | 8.92E-47 | 4 Ngp       |
| 8.82E-49 | 0.567879307  | 0.871 | 0.719 | 1.16E-44 | 4 Cd52      |
| 2.70E-48 | 0.524361959  | 0.884 | 0.761 | 3.56E-44 | 4 B2m       |
| 2.79E-47 | -1.724441963 | 0.251 | 0.565 | 3.68E-43 | 4 Ltf       |
| 3.96E-47 | -1.444538167 | 0.139 | 0.473 | 5.22E-43 | 4 Pglyrp1   |
| 6.34E-47 | 0.827826932  | 0.59  | 0.345 | 8.36E-43 | 4 Lst1      |
| 6.17E-45 | -2.129181351 | 0.986 | 0.995 | 8.14E-41 | 4 S100a9    |
| 7.07E-44 | 0.510136693  | 0.863 | 0.768 | 9.33E-40 | 4 H3f3a     |
| 1.10E-43 | 0.748048627  | 0.637 | 0.411 | 1.45E-39 | 4 Prdx1     |
| 9.36E-42 | -0.67032588  | 0.747 | 0.85  | 1.23E-37 | 4 Ptma      |
| 1.08E-41 | 0.406780376  | 0.973 | 0.915 | 1.43E-37 | 4 Fau       |
| 7.97E-41 | -2.050522735 | 0.998 | 0.999 | 1.05E-36 | 4 S100a8    |
| 1.02E-40 | 0.633345373  | 0.737 | 0.564 | 1.35E-36 | 4 H2-D1     |
| 5.31E-40 | -2.023914866 | 0.837 | 0.939 | 7.00E-36 | 4 Camp      |
| 8.02E-40 | -1.484759216 | 0.106 | 0.408 | 1.06E-35 | 4 Hist1h2ap |
| 2.15E-39 | 0.968756615  | 0.294 | 0.108 | 2.83E-35 | 4 Smpdl3a   |
| 4.07E-38 | 0.705672762  | 0.629 | 0.436 | 5.36E-34 | 4 Alox5ap   |
| 2.31E-37 | 0.753349224  | 0.524 | 0.299 | 3.04E-33 | 4 Lsp1      |
| 2.17E-36 | 0.489427355  | 0.857 | 0.67  | 2.86E-32 | 4 Plac8     |
| 6.14E-36 | -0.664306836 | 0.439 | 0.711 | 8.10E-32 | 4 Hmgb1     |



|          |              |       |       |          |   |               |
|----------|--------------|-------|-------|----------|---|---------------|
| 5.26E-35 | 0.813078069  | 0.52  | 0.325 | 6.94E-31 | 4 | lfitm2        |
| 5.32E-35 | 0.954819141  | 0.292 | 0.114 | 7.02E-31 | 4 | Ctsc          |
| 1.19E-34 | 0.383257413  | 0.933 | 0.868 | 1.57E-30 | 4 | Rps9          |
| 3.83E-34 | 0.808889954  | 0.441 | 0.234 | 5.05E-30 | 4 | Tmcc1         |
| 8.24E-34 | 0.853242485  | 0.365 | 0.17  | 1.09E-29 | 4 | Samhd1        |
| 1.18E-33 | 0.481262192  | 0.824 | 0.698 | 1.55E-29 | 4 | Tpt1          |
| 1.49E-33 | -0.898718434 | 0.137 | 0.436 | 1.96E-29 | 4 | Stmn1         |
| 2.52E-33 | -0.581558099 | 0.6   | 0.794 | 3.33E-29 | 4 | Hmgb2         |
| 1.42E-32 | 0.768205901  | 0.502 | 0.307 | 1.87E-28 | 4 | Npc2          |
| 1.90E-32 | 0.844818006  | 0.424 | 0.23  | 2.50E-28 | 4 | Fxyd5         |
| 2.42E-32 | -1.006621059 | 0.082 | 0.354 | 3.19E-28 | 4 | 2810417H13Rik |
| 3.24E-32 | 0.696800562  | 0.612 | 0.435 | 4.27E-28 | 4 | Psm7          |
| 1.89E-31 | 0.789619431  | 0.378 | 0.181 | 2.49E-27 | 4 | Mpeg1         |
| 2.14E-31 | 0.343227513  | 0.976 | 0.874 | 2.83E-27 | 4 | Rps14         |
| 6.41E-31 | -1.050865977 | 0.035 | 0.276 | 8.45E-27 | 4 | Gm10282       |
| 3.77E-30 | -0.723038328 | 0.239 | 0.53  | 4.98E-26 | 4 | Cbx3          |
| 1.89E-29 | -0.963239717 | 0.063 | 0.315 | 2.49E-25 | 4 | Cd24a         |
| 3.57E-29 | 0.816651805  | 0.271 | 0.111 | 4.70E-25 | 4 | Ifi30         |
| 7.66E-29 | 0.515099035  | 0.749 | 0.603 | 1.01E-24 | 4 | Ly6c2         |
| 8.18E-29 | 0.794908066  | 0.333 | 0.156 | 1.08E-24 | 4 | Pld4          |
| 1.04E-28 | 0.262199994  | 0.996 | 0.953 | 1.37E-24 | 4 | Rps27         |
| 1.09E-27 | 0.789223198  | 0.42  | 0.244 | 1.44E-23 | 4 | Cebpb         |
| 4.31E-27 | 0.585889276  | 0.647 | 0.518 | 5.68E-23 | 4 | Coro1a        |
| 1.49E-26 | -0.839521189 | 0.094 | 0.337 | 1.96E-22 | 4 | Top2a         |
| 7.89E-26 | 0.585754713  | 0.649 | 0.527 | 1.04E-21 | 4 | Mrpl33        |
| 2.67E-25 | 0.81180992   | 0.286 | 0.132 | 3.53E-21 | 4 | Anxa5         |
| 9.09E-25 | 0.65152918   | 0.543 | 0.401 | 1.20E-20 | 4 | Atox1         |
| 1.78E-24 | 0.435938452  | 0.784 | 0.676 | 2.34E-20 | 4 | Cyba          |
| 1.98E-24 | -0.693354992 | 0.139 | 0.386 | 2.61E-20 | 4 | Tuba1b        |
| 3.11E-24 | 0.740761665  | 0.443 | 0.282 | 4.10E-20 | 4 | Sat1          |
| 5.01E-24 | 0.702168519  | 0.376 | 0.208 | 6.61E-20 | 4 | Gm2a          |

|          |              |       |       |          |   |         |
|----------|--------------|-------|-------|----------|---|---------|
| 4.76E-23 | 0.724733613  | 0.402 | 0.244 | 6.28E-19 | 4 | Anxa2   |
| 7.86E-23 | 0.407891432  | 0.808 | 0.74  | 1.04E-18 | 4 | Gpx1    |
| 1.23E-22 | -0.689686695 | 0.273 | 0.516 | 1.62E-18 | 4 | Tubb5   |
| 1.24E-21 | 0.388796777  | 0.849 | 0.787 | 1.64E-17 | 4 | Gm9843  |
| 1.32E-21 | 0.778805795  | 0.28  | 0.137 | 1.74E-17 | 4 | Capg    |
| 1.06E-20 | 0.492459661  | 0.6   | 0.458 | 1.39E-16 | 4 | Ly6e    |
| 2.75E-20 | 0.275889993  | 0.937 | 0.837 | 3.63E-16 | 4 | Rps27rt |
| 5.22E-20 | 0.674296774  | 0.443 | 0.308 | 6.89E-16 | 4 | Gm10116 |
| 6.99E-20 | 0.425081424  | 0.718 | 0.643 | 9.22E-16 | 4 | Itm2b   |
| 1.19E-19 | 0.342643767  | 0.841 | 0.684 | 1.57E-15 | 4 | Rpl10   |
| 1.65E-19 | 0.388084354  | 0.743 | 0.682 | 2.18E-15 | 4 | Actg1   |
| 2.15E-19 | -1.618567745 | 0.082 | 0.261 | 2.83E-15 | 4 | Elane   |
| 6.37E-19 | -0.507927088 | 0.165 | 0.393 | 8.41E-15 | 4 | H2afv   |
| 1.22E-18 | -0.543608077 | 0.133 | 0.342 | 1.61E-14 | 4 | Cks2    |
| 4.94E-18 | -0.512338985 | 0.196 | 0.426 | 6.52E-14 | 4 | Anp32b  |
| 8.00E-18 | 0.610867268  | 0.504 | 0.395 | 1.06E-13 | 4 | Dbi     |
| 8.32E-18 | 0.289109627  | 0.894 | 0.798 | 1.10E-13 | 4 | Rpl34   |
| 1.07E-17 | -0.579277223 | 0.198 | 0.413 | 1.41E-13 | 4 | Dstn    |
| 1.31E-17 | 0.417278056  | 0.714 | 0.661 | 1.72E-13 | 4 | Cox4i1  |
| 2.23E-17 | 0.446091353  | 0.618 | 0.492 | 2.94E-13 | 4 | Cybb    |
| 2.35E-17 | 0.605289928  | 0.439 | 0.306 | 3.10E-13 | 4 | Ptprc   |
| 2.68E-17 | 0.711614032  | 0.265 | 0.14  | 3.53E-13 | 4 | Tpd52   |
| 2.82E-17 | 0.590477989  | 0.469 | 0.344 | 3.72E-13 | 4 | Msrb1   |
| 3.10E-17 | -0.548027859 | 0.182 | 0.389 | 4.09E-13 | 4 | Srrm2   |
| 3.21E-17 | 0.651363006  | 0.329 | 0.201 | 4.24E-13 | 4 | Lamp1   |
| 7.13E-17 | 0.274577363  | 0.904 | 0.785 | 9.41E-13 | 4 | Rps11   |
| 7.62E-17 | 0.641430035  | 0.363 | 0.23  | 1.01E-12 | 4 | Slnf2   |
| 8.35E-17 | -0.579716195 | 0.155 | 0.357 | 1.10E-12 | 4 | Set     |
| 1.09E-16 | 0.580838864  | 0.396 | 0.253 | 1.44E-12 | 4 | S100a10 |
| 2.88E-16 | -0.560342002 | 0.08  | 0.252 | 3.79E-12 | 4 | Cks1b   |
| 4.52E-16 | 0.624565542  | 0.41  | 0.284 | 5.96E-12 | 4 | Laptm5  |

|          |              |       |       |          |                 |
|----------|--------------|-------|-------|----------|-----------------|
| 7.01E-16 | -0.452781716 | 0.149 | 0.351 | 9.24E-12 | 4 Nucks1        |
| 7.89E-16 | 0.316035059  | 0.822 | 0.777 | 1.04E-11 | 4 Shfm1         |
| 9.87E-16 | 0.323110308  | 0.767 | 0.701 | 1.30E-11 | 4 Sub1          |
| 2.69E-15 | 0.590840004  | 0.271 | 0.147 | 3.55E-11 | 4 Ctsh          |
| 3.35E-15 | -1.116016217 | 0.12  | 0.282 | 4.42E-11 | 4 Mpo           |
| 4.47E-15 | -0.518945872 | 0.086 | 0.253 | 5.90E-11 | 4 Ube2s         |
| 5.25E-15 | 0.541862142  | 0.465 | 0.355 | 6.93E-11 | 4 Serp1         |
| 6.61E-15 | -1.033464677 | 0.127 | 0.285 | 8.72E-11 | 4 Prtn3         |
| 7.36E-15 | -0.638590207 | 0.257 | 0.443 | 9.71E-11 | 4 Anxa1         |
| 1.21E-14 | -0.458913698 | 0.196 | 0.4   | 1.59E-10 | 4 1810037117Rik |
| 1.29E-14 | 0.556199512  | 0.369 | 0.246 | 1.70E-10 | 4 Vim           |
| 1.03E-13 | -0.387703545 | 0.184 | 0.381 | 1.36E-09 | 4 Ran           |
| 1.48E-13 | -0.387766504 | 0.2   | 0.392 | 1.95E-09 | 4 Eif5a         |
| 2.04E-13 | 0.595411414  | 0.396 | 0.282 | 2.69E-09 | 4 Mgst1         |
| 2.46E-13 | -0.372660779 | 0.192 | 0.387 | 3.24E-09 | 4 Srsf2         |
| 2.51E-13 | 0.569377978  | 0.32  | 0.203 | 3.31E-09 | 4 Ctsb          |
| 2.85E-13 | 0.575075212  | 0.3   | 0.187 | 3.76E-09 | 4 Emb           |
| 2.94E-13 | -0.546767757 | 0.11  | 0.267 | 3.87E-09 | 4 Ncl           |
| 1.01E-12 | -0.405688758 | 0.133 | 0.3   | 1.33E-08 | 4 Tagln2        |
| 1.64E-12 | 0.356349069  | 0.694 | 0.645 | 2.17E-08 | 4 Atp5l         |
| 1.80E-12 | -0.389055178 | 0.457 | 0.652 | 2.38E-08 | 4 Xist          |
| 3.06E-12 | 0.623001059  | 0.259 | 0.158 | 4.04E-08 | 4 Napsa         |
| 4.70E-12 | 0.55119526   | 0.384 | 0.284 | 6.19E-08 | 4 Rsrp1         |
| 6.17E-12 | -0.450979334 | 0.173 | 0.338 | 8.14E-08 | 4 Hsp90aa1      |
| 6.66E-12 | 0.485059202  | 0.506 | 0.439 | 8.78E-08 | 4 Arpc1b        |
| 8.82E-12 | -0.365865705 | 0.171 | 0.346 | 1.16E-07 | 4 Irf2bp2       |
| 1.19E-11 | -0.391040557 | 0.114 | 0.268 | 1.57E-07 | 4 Alyref        |
| 5.43E-11 | 0.471534283  | 0.484 | 0.412 | 7.17E-07 | 4 Cdc42         |
| 5.97E-11 | 0.364643599  | 0.631 | 0.569 | 7.88E-07 | 4 Rpl36al       |
| 6.18E-11 | 0.587609777  | 0.412 | 0.328 | 8.16E-07 | 4 Pomp          |
| 9.91E-11 | -0.333859618 | 0.155 | 0.314 | 1.31E-06 | 4 Erh           |

|          |              |       |       |             |             |
|----------|--------------|-------|-------|-------------|-------------|
| 2.34E-10 | -0.291734103 | 0.251 | 0.438 | 3.09E-06    | 4 Tkt       |
| 3.37E-10 | -0.276329888 | 0.251 | 0.438 | 4.45E-06    | 4 Arpp19    |
| 4.48E-10 | -0.364431005 | 0.292 | 0.464 | 5.91E-06    | 4 Atpif1    |
| 4.52E-10 | 0.442273532  | 0.535 | 0.486 | 5.97E-06    | 4 Arpc2     |
| 5.37E-10 | -0.313804152 | 0.143 | 0.293 | 7.08E-06    | 4 Hnrnpab   |
| 1.65E-09 | 0.250418785  | 0.684 | 0.593 | 2.18E-05    | 4 Rpl3      |
| 3.24E-09 | -0.285434668 | 0.19  | 0.35  | 4.28E-05    | 4 Srsf3     |
| 6.24E-09 | -0.349251414 | 0.19  | 0.336 | 8.23E-05    | 4 Ranbp1    |
| 8.67E-09 | 0.299869059  | 0.659 | 0.636 | 0.000114389 | 4 Sec61g    |
| 1.21E-08 | -0.266909327 | 0.169 | 0.316 | 0.000160267 | 4 Tsix      |
| 1.28E-08 | -0.313478325 | 0.194 | 0.338 | 0.000168834 | 4 Ap3s1     |
| 1.36E-08 | 0.527152424  | 0.304 | 0.223 | 0.000179314 | 4 Rrbp1     |
| 2.35E-08 | 0.493218241  | 0.324 | 0.245 | 0.000309547 | 4 Psmb8     |
| 2.99E-08 | -0.266428062 | 0.222 | 0.38  | 0.000394485 | 4 Dek       |
| 4.93E-08 | 0.514258143  | 0.402 | 0.327 | 0.000650315 | 4 Notch2    |
| 5.57E-08 | 0.427869184  | 0.408 | 0.351 | 0.000734805 | 4 Fam49b    |
| 6.88E-08 | -0.265621703 | 0.31  | 0.476 | 0.00090692  | 4 Rac2      |
| 1.18E-07 | -0.316390726 | 0.357 | 0.495 | 0.001553614 | 4 Rpl12     |
| 1.51E-07 | 0.48922512   | 0.324 | 0.249 | 0.001992787 | 4 Btg1      |
| 2.32E-07 | -0.318775247 | 0.243 | 0.379 | 0.003064131 | 4 Myh9      |
| 2.43E-07 | 0.490357859  | 0.29  | 0.217 | 0.003199025 | 4 Gltscr2   |
| 4.35E-07 | 0.431253826  | 0.406 | 0.359 | 0.005739538 | 4 BC005537  |
| 6.26E-07 | -0.814012076 | 0.324 | 0.489 | 0.008253649 | 4 Retnlg    |
| 6.85E-07 | 0.522137409  | 0.302 | 0.237 | 0.009030659 | 4 Zfp3612   |
| 7.79E-07 | 0.441717658  | 0.41  | 0.364 | 0.010275932 | 4 Capza2    |
| 8.50E-07 | 0.483392434  | 0.318 | 0.253 | 0.011209248 | 4 Ucp2      |
| 8.63E-07 | 0.473563806  | 0.339 | 0.282 | 0.011384373 | 4 Clta      |
| 9.91E-07 | -0.275418715 | 0.153 | 0.267 | 0.013067747 | 4 Lmo4      |
| 1.01E-06 | 0.484266374  | 0.304 | 0.236 | 0.013339758 | 4 Msn       |
| 1.21E-06 | 0.446966274  | 0.373 | 0.322 | 0.015978574 | 4 Eif3f     |
| 1.42E-06 | 0.291948144  | 0.512 | 0.463 | 0.018781613 | 4 Rpl10-ps3 |

|            |              |       |       |             |   |        |
|------------|--------------|-------|-------|-------------|---|--------|
| 2.48E-06   | -0.264054298 | 0.161 | 0.272 | 0.03276212  | 4 | Ncf1   |
| 2.92E-06   | 0.458195903  | 0.337 | 0.276 | 0.03851991  | 4 | Rap1b  |
| 2.93E-06   | 0.408358122  | 0.394 | 0.344 | 0.038586011 | 4 | Ptpn18 |
| 2.97E-06   | 0.365641495  | 0.455 | 0.424 | 0.039143153 | 4 | Eef2   |
| 4.86E-06   | 0.49967365   | 0.251 | 0.19  | 0.064157549 | 4 | Klf13  |
| 5.01E-06   | 0.335778822  | 0.463 | 0.429 | 0.066049562 | 4 | Tspo   |
| 5.86E-06   | 0.404705785  | 0.32  | 0.262 | 0.077268491 | 4 | Cotl1  |
| 1.10E-05   | 0.392838359  | 0.429 | 0.396 | 0.145751532 | 4 | Actr3  |
| 1.29E-05   | 0.400242084  | 0.257 | 0.197 | 0.170035432 | 4 | Ccdc12 |
| 1.43E-05   | 0.268195977  | 0.512 | 0.466 | 0.188962712 | 4 | Gm8730 |
| 1.96E-05   | 0.348992063  | 0.41  | 0.369 | 0.259181427 | 4 | Arpc5  |
| 2.23E-05   | 0.318390504  | 0.492 | 0.481 | 0.294630762 | 4 | Uqcrh  |
| 4.54E-05   | 0.425167031  | 0.318 | 0.273 | 0.599224943 | 4 | Rac1   |
| 5.80E-05   | 0.457702173  | 0.251 | 0.201 | 0.765474287 | 4 | Cmpk1  |
| 6.19E-05   | 0.439533967  | 0.373 | 0.347 | 0.816744104 | 4 | Ndufa6 |
| 9.95E-05   | 0.366727413  | 0.396 | 0.363 | 1           | 4 | Emp3   |
| 0.00011697 | 0.497470436  | 0.294 | 0.256 | 1           | 4 | Aprt   |
| 0.00016622 | 0.432593661  | 0.339 | 0.302 | 1           | 4 | Taldo1 |
| 0.00019248 | 0.392037116  | 0.345 | 0.316 | 1           | 4 | Nedd8  |
| 0.00024724 | 0.400344591  | 0.292 | 0.253 | 1           | 4 | Atp5c1 |
| 0.00028703 | 0.380769476  | 0.282 | 0.241 | 1           | 4 | Rap1a  |
| 0.00031573 | 0.390647949  | 0.316 | 0.286 | 1           | 4 | Sdcbp  |
| 0.00039651 | 0.396434997  | 0.296 | 0.261 | 1           | 4 | Gnas   |
| 0.00043179 | 0.359502502  | 0.32  | 0.281 | 1           | 4 | Nsa2   |
| 0.00044616 | 0.336960815  | 0.312 | 0.275 | 1           | 4 | lqgap1 |
| 0.00055751 | 0.386687461  | 0.335 | 0.309 | 1           | 4 | Arf5   |
| 0.0006629  | 0.343884038  | 0.269 | 0.226 | 1           | 4 | Sell   |
| 0.00068406 | 0.367179683  | 0.355 | 0.326 | 1           | 4 | Cd53   |
| 0.0007006  | 0.274829739  | 0.473 | 0.474 | 1           | 4 | H2afj  |
| 0.0008516  | 0.419157261  | 0.278 | 0.247 | 1           | 4 | Capzb  |
| 0.00137008 | 0.45421617   | 0.324 | 0.314 | 1           | 4 | Eif3k  |

|            |             |       |       |   |           |
|------------|-------------|-------|-------|---|-----------|
| 0.0016941  | 0.391133458 | 0.302 | 0.275 | 1 | 4 Reep5   |
| 0.00183871 | 0.319896712 | 0.384 | 0.376 | 1 | 4 Btf3    |
| 0.0019749  | 0.310988654 | 0.32  | 0.295 | 1 | 4 Cdk2ap2 |
| 0.00209655 | 0.375099119 | 0.324 | 0.305 | 1 | 4 Polr2l  |
| 0.00230282 | 0.355752733 | 0.28  | 0.248 | 1 | 4 Ostf1   |
| 0.00247058 | 0.345437849 | 0.304 | 0.279 | 1 | 4 Myl12b  |
| 0.00249431 | 0.347363757 | 0.257 | 0.221 | 1 | 4 Spi1    |
| 0.00426085 | 0.31527876  | 0.341 | 0.325 | 1 | 4 Lamtor4 |
| 0.00554087 | 0.32138276  | 0.28  | 0.254 | 1 | 4 Flna    |
| 0.00564429 | 0.347230902 | 0.259 | 0.232 | 1 | 4 Atp6v1f |

|           |              |       |       |           |           |
|-----------|--------------|-------|-------|-----------|-----------|
| 1.46E-146 | 1.123722329  | 0.937 | 0.56  | 1.93E-142 | 5 Hmgn2   |
| 3.77E-143 | 1.478665363  | 0.629 | 0.176 | 4.97E-139 | 5 Fcnb    |
| 5.43E-129 | 1.049275684  | 1     | 0.926 | 7.16E-125 | 5 Camp    |
| 1.64E-111 | 0.955416772  | 0.996 | 0.838 | 2.16E-107 | 5 Ngp     |
| 1.54E-107 | 0.81492306   | 0.998 | 0.602 | 2.03E-103 | 5 Wfdc21  |
| 9.52E-98  | 0.872010436  | 1     | 0.999 | 1.26E-93  | 5 S100a8  |
| 1.76E-97  | 0.890613292  | 1     | 0.994 | 2.33E-93  | 5 S100a9  |
| 2.37E-95  | 0.845289285  | 0.918 | 0.524 | 3.13E-91  | 5 Chil3   |
| 5.50E-95  | -2.053441055 | 0.363 | 0.769 | 7.26E-91  | 5 Tmsb10  |
| 3.79E-87  | 0.80312827   | 0.851 | 0.416 | 5.00E-83  | 5 Pglyrp1 |
| 2.31E-86  | 0.756084256  | 0.944 | 0.528 | 3.05E-82  | 5 Lcn2    |
| 1.12E-76  | -0.71583715  | 0.886 | 0.962 | 1.48E-72  | 5 Rps27   |
| 2.17E-68  | -1.881692889 | 0.287 | 0.664 | 2.86E-64  | 5 Crip1   |
| 2.72E-63  | -0.771742223 | 0.73  | 0.893 | 3.59E-59  | 5 Rps14   |
| 4.66E-61  | -0.876897889 | 0.581 | 0.811 | 6.15E-57  | 5 Rps11   |
| 9.55E-59  | -0.894126304 | 0.583 | 0.8   | 1.26E-54  | 5 Rps5    |
| 2.73E-58  | 0.980132094  | 0.525 | 0.237 | 3.61E-54  | 5 Gm10282 |
| 3.85E-57  | -1.465673151 | 0.197 | 0.57  | 5.07E-53  | 5 Psap    |
| 1.42E-56  | -0.753851217 | 0.646 | 0.859 | 1.88E-52  | 5 Rps27rt |
| 6.24E-56  | -0.967619996 | 0.415 | 0.717 | 8.24E-52  | 5 Rpl10   |
| 1.05E-55  | -0.727208377 | 0.754 | 0.884 | 1.38E-51  | 5 Rpl18a  |

**Neutrophil**

|          |              |       |       |          |          |
|----------|--------------|-------|-------|----------|----------|
| 1.82E-55 | -1.643662036 | 0.136 | 0.504 | 2.40E-51 | 5 Lgals1 |
| 3.88E-55 | -1.137453863 | 0.311 | 0.668 | 5.12E-51 | 5 Fth1   |
| 1.27E-51 | -0.753020476 | 0.713 | 0.862 | 1.67E-47 | 5 Rpl13  |
| 2.42E-51 | -0.659199084 | 0.803 | 0.909 | 3.19E-47 | 5 Rpl37  |
| 7.08E-50 | -0.636812181 | 0.806 | 0.908 | 9.34E-46 | 5 Rps28  |
| 3.90E-49 | -0.77269606  | 0.648 | 0.821 | 5.15E-45 | 5 Rpl13a |
| 8.29E-49 | -0.885198659 | 0.467 | 0.73  | 1.09E-44 | 5 Rplp0  |
| 4.87E-48 | 0.535114985  | 0.84  | 0.518 | 6.42E-44 | 5 Ltf    |
| 9.02E-48 | -1.396474484 | 0.225 | 0.556 | 1.19E-43 | 5 S100a6 |
| 6.97E-47 | -0.828804565 | 0.581 | 0.78  | 9.20E-43 | 5 Rpl36  |
| 7.03E-47 | 0.808038502  | 0.419 | 0.163 | 9.27E-43 | 5 Cebpe  |
| 3.03E-46 | -0.734248601 | 0.585 | 0.796 | 4.00E-42 | 5 Rpl26  |
| 1.45E-45 | -0.598657588 | 0.715 | 0.885 | 1.92E-41 | 5 Rps9   |
| 5.46E-45 | -0.858030291 | 0.521 | 0.739 | 7.20E-41 | 5 Rplp1  |
| 7.24E-45 | -0.622709897 | 0.784 | 0.905 | 9.56E-41 | 5 Rps19  |
| 8.27E-45 | -0.868699368 | 0.4   | 0.679 | 1.09E-40 | 5 Eef1a1 |
| 1.53E-44 | -0.757990684 | 0.497 | 0.739 | 2.02E-40 | 5 Rpl27a |
| 3.04E-44 | -0.558202493 | 0.914 | 0.959 | 4.00E-40 | 5 Rpl41  |
| 4.02E-44 | -0.679931951 | 0.749 | 0.866 | 5.31E-40 | 5 Rpl35  |
| 1.19E-43 | -1.262745984 | 0.123 | 0.452 | 1.58E-39 | 5 Prdx1  |
| 1.11E-42 | -1.162501718 | 0.168 | 0.492 | 1.47E-38 | 5 Ly6e   |
| 2.41E-42 | -0.7340518   | 0.538 | 0.763 | 3.18E-38 | 5 Rps6   |
| 8.72E-42 | 0.531204826  | 1     | 0.999 | 1.15E-37 | 5 Actb   |
| 2.10E-41 | -0.693660718 | 0.579 | 0.787 | 2.77E-37 | 5 Rps3a1 |
| 2.90E-41 | -0.664559952 | 0.693 | 0.847 | 3.82E-37 | 5 Rps18  |
| 4.03E-41 | -0.75356719  | 0.523 | 0.741 | 5.31E-37 | 5 Rps4x  |
| 6.26E-40 | -0.619590955 | 0.739 | 0.877 | 8.26E-36 | 5 Rpl32  |
| 1.79E-39 | -0.655054137 | 0.644 | 0.824 | 2.36E-35 | 5 Rps23  |
| 1.83E-39 | -0.695059557 | 0.613 | 0.837 | 2.41E-35 | 5 Ftl1   |
| 3.07E-39 | -0.674919398 | 0.605 | 0.79  | 4.04E-35 | 5 Rpl39  |
| 4.64E-38 | -0.641176688 | 0.598 | 0.781 | 6.12E-34 | 5 Rpl21  |

|          |              |       |       |          |                 |
|----------|--------------|-------|-------|----------|-----------------|
| 6.12E-38 | -0.908031148 | 0.471 | 0.7   | 8.08E-34 | 5 Plac8         |
| 8.40E-38 | 0.663634343  | 0.691 | 0.461 | 1.11E-33 | 5 F630028O10Rik |
| 1.57E-37 | -0.852962553 | 0.354 | 0.619 | 2.08E-33 | 5 Rpl3          |
| 1.84E-37 | -0.547867447 | 0.987 | 0.998 | 2.42E-33 | 5 Malat1        |
| 3.26E-37 | -0.484437974 | 0.898 | 0.942 | 4.30E-33 | 5 Rpl37a        |
| 5.05E-37 | -0.648672566 | 0.59  | 0.792 | 6.66E-33 | 5 Rplp2         |
| 1.12E-36 | -0.84297824  | 0.326 | 0.595 | 1.48E-32 | 5 Rpl10a        |
| 1.12E-36 | 0.433503932  | 0.948 | 0.766 | 1.48E-32 | 5 Hmgb2         |
| 3.85E-36 | -0.589900563 | 0.616 | 0.82  | 5.08E-32 | 5 Rpl34         |
| 4.74E-36 | -0.665736861 | 0.518 | 0.738 | 6.25E-32 | 5 Rpl19         |
| 1.65E-35 | -0.584848934 | 0.721 | 0.859 | 2.18E-31 | 5 Rpl38         |
| 2.19E-35 | -0.730888588 | 0.456 | 0.692 | 2.89E-31 | 5 Gm2000        |
| 3.33E-35 | -0.6926379   | 0.495 | 0.722 | 4.39E-31 | 5 Sub1          |
| 5.03E-35 | -0.595217516 | 0.667 | 0.818 | 6.64E-31 | 5 Rps16         |
| 2.68E-34 | -0.939084967 | 0.203 | 0.49  | 3.54E-30 | 5 Gm8730        |
| 3.49E-34 | -0.952308005 | 0.402 | 0.65  | 4.61E-30 | 5 Cst3          |
| 3.62E-34 | -0.745404161 | 0.492 | 0.701 | 4.78E-30 | 5 Rpl14         |
| 5.72E-34 | -0.614217173 | 0.596 | 0.774 | 7.55E-30 | 5 Rps3          |
| 1.09E-33 | -0.610205112 | 0.518 | 0.737 | 1.44E-29 | 5 Rpl6          |
| 1.44E-33 | -0.610014648 | 0.598 | 0.775 | 1.90E-29 | 5 Rpl17         |
| 3.89E-33 | 0.854299826  | 0.559 | 0.354 | 5.13E-29 | 5 Myh9          |
| 5.41E-33 | -0.38189166  | 0.959 | 0.977 | 7.14E-29 | 5 Rps29         |
| 6.27E-33 | -1.544632541 | 0.108 | 0.378 | 8.27E-29 | 5 Ifi27l2a      |
| 1.00E-32 | -0.587075066 | 0.555 | 0.76  | 1.32E-28 | 5 Rps15         |
| 1.51E-32 | -1.305780926 | 0.071 | 0.336 | 1.99E-28 | 5 Ms4a6c        |
| 2.04E-32 | 0.620817935  | 0.609 | 0.38  | 2.69E-28 | 5 Dstn          |
| 1.06E-31 | -0.726461766 | 0.352 | 0.609 | 1.40E-27 | 5 Rpl4          |
| 1.10E-31 | -1.304102334 | 0.026 | 0.275 | 1.46E-27 | 5 Gm9844        |
| 2.24E-31 | -0.63208726  | 0.566 | 0.736 | 2.95E-27 | 5 Rps26         |
| 2.76E-31 | -0.575595755 | 0.551 | 0.764 | 3.64E-27 | 5 Rps15a        |
| 3.32E-31 | -0.691374668 | 0.432 | 0.66  | 4.38E-27 | 5 Rpl18         |



|          |              |       |       |          |                 |
|----------|--------------|-------|-------|----------|-----------------|
| 7.35E-31 | -0.580327285 | 0.594 | 0.756 | 9.70E-27 | 5 Rpl24         |
| 7.37E-31 | -1.34466542  | 0.043 | 0.292 | 9.72E-27 | 5 Ccr2          |
| 2.00E-30 | -0.653829888 | 0.423 | 0.664 | 2.64E-26 | 5 Gm10263       |
| 2.14E-30 | -0.894114875 | 0.227 | 0.485 | 2.82E-26 | 5 Rpl10-ps3     |
| 4.31E-30 | 0.851361905  | 0.365 | 0.173 | 5.68E-26 | 5 Cap1          |
| 6.80E-30 | -1.114858608 | 0.326 | 0.577 | 8.97E-26 | 5 Ifitm3        |
| 9.67E-30 | -0.746587474 | 0.356 | 0.596 | 1.28E-25 | 5 Rpl15         |
| 2.40E-29 | -0.992061851 | 0.197 | 0.457 | 3.16E-25 | 5 Lgals3        |
| 5.91E-29 | -0.558929345 | 0.732 | 0.844 | 7.80E-25 | 5 Rps8          |
| 1.10E-28 | -0.56566048  | 0.575 | 0.767 | 1.45E-24 | 5 Gm10076       |
| 2.24E-28 | -0.446800594 | 0.743 | 0.887 | 2.96E-24 | 5 Rps27a        |
| 2.30E-28 | -0.959960295 | 0.151 | 0.401 | 3.03E-24 | 5 Npm1          |
| 4.55E-28 | -0.811440646 | 0.194 | 0.458 | 6.00E-24 | 5 Gnb2l1        |
| 5.45E-28 | -0.595643724 | 0.562 | 0.787 | 7.20E-24 | 5 B2m           |
| 8.47E-28 | -0.841168938 | 0.263 | 0.501 | 1.12E-23 | 5 Rpl12         |
| 1.16E-27 | 0.442673326  | 0.806 | 0.654 | 1.53E-23 | 5 Arhgdib       |
| 1.53E-27 | -0.552106116 | 0.531 | 0.731 | 2.01E-23 | 5 Rpl11         |
| 2.21E-27 | -0.487567689 | 0.678 | 0.83  | 2.92E-23 | 5 Rpl23a        |
| 2.32E-27 | -0.600375241 | 0.516 | 0.705 | 3.06E-23 | 5 Rps7          |
| 2.40E-27 | -1.140362443 | 0.028 | 0.252 | 3.16E-23 | 5 Zeb2          |
| 4.52E-27 | -0.599559784 | 0.518 | 0.705 | 5.97E-23 | 5 Rps13         |
| 8.94E-27 | -1.123599158 | 0.052 | 0.28  | 1.18E-22 | 5 S100a10       |
| 1.31E-26 | -0.553847221 | 0.583 | 0.754 | 1.73E-22 | 5 Rpl23         |
| 4.39E-26 | -0.558076451 | 0.475 | 0.7   | 5.80E-22 | 5 Rpsa          |
| 4.49E-26 | 0.622491764  | 0.553 | 0.371 | 5.92E-22 | 5 1810037l17Rik |
| 1.78E-25 | -0.795436475 | 0.225 | 0.456 | 2.35E-21 | 5 Gm10073       |
| 2.74E-25 | -0.657063063 | 0.272 | 0.525 | 3.61E-21 | 5 Sec61b        |
| 5.42E-25 | -0.953063733 | 0.108 | 0.339 | 7.15E-21 | 5 Npc2          |
| 5.50E-25 | -0.810627235 | 0.199 | 0.436 | 7.26E-21 | 5 Hsp90ab1      |
| 9.80E-25 | -0.544690043 | 0.497 | 0.694 | 1.29E-20 | 5 Rpl27         |
| 1.19E-24 | -0.570965323 | 0.456 | 0.662 | 1.57E-20 | 5 Rpl8          |

|          |              |       |       |          |              |
|----------|--------------|-------|-------|----------|--------------|
| 2.04E-24 | -0.761579635 | 0.218 | 0.451 | 2.69E-20 | 5 Rpl13-ps3  |
| 2.51E-24 | -0.59289144  | 0.691 | 0.825 | 3.32E-20 | 5 Tyrobp     |
| 3.77E-24 | 0.632269845  | 0.395 | 0.21  | 4.97E-20 | 5 Cd63       |
| 5.95E-24 | -0.754376572 | 0.227 | 0.466 | 7.85E-20 | 5 Psma7      |
| 1.15E-23 | -0.611810064 | 0.497 | 0.672 | 1.52E-19 | 5 Rps12      |
| 1.81E-23 | -0.358984415 | 0.834 | 0.926 | 2.39E-19 | 5 Fau        |
| 2.71E-23 | -0.893941599 | 0.084 | 0.3   | 3.57E-19 | 5 Eef1g      |
| 2.92E-23 | -0.70341652  | 0.367 | 0.569 | 3.86E-19 | 5 Rps2       |
| 3.83E-23 | -0.515101367 | 0.559 | 0.721 | 5.06E-19 | 5 Rpl28      |
| 1.64E-22 | -0.532271189 | 0.551 | 0.721 | 2.16E-18 | 5 Rpl31      |
| 2.63E-22 | -0.660125975 | 0.361 | 0.594 | 3.47E-18 | 5 H2-D1      |
| 2.99E-22 | -0.913824965 | 0.095 | 0.31  | 3.94E-18 | 5 Pdcd4      |
| 3.10E-22 | -0.764799539 | 0.201 | 0.419 | 4.09E-18 | 5 Rpl36-ps3  |
| 3.38E-22 | -0.609822478 | 0.477 | 0.657 | 4.46E-18 | 5 Rpl36a     |
| 3.39E-22 | -0.5361887   | 0.492 | 0.67  | 4.47E-18 | 5 Rps10      |
| 3.59E-22 | -0.514157648 | 0.486 | 0.685 | 4.73E-18 | 5 Rpl23a-ps3 |
| 3.14E-21 | -0.433593152 | 0.706 | 0.812 | 4.14E-17 | 5 Rps24      |
| 8.13E-21 | -0.580657603 | 0.419 | 0.604 | 1.07E-16 | 5 Wdr89      |
| 8.68E-21 | -0.657861282 | 0.22  | 0.443 | 1.15E-16 | 5 Eef2       |
| 3.52E-20 | 0.596106371  | 0.305 | 0.151 | 4.64E-16 | 5 Ms4a3      |
| 3.71E-20 | -0.459995528 | 0.549 | 0.72  | 4.89E-16 | 5 Tpt1       |
| 7.29E-20 | -0.60485034  | 0.302 | 0.519 | 9.62E-16 | 5 Mbnl1      |
| 1.19E-19 | -0.610267786 | 0.339 | 0.54  | 1.57E-15 | 5 Rpl22      |
| 3.78E-19 | -0.625872351 | 0.283 | 0.485 | 4.98E-15 | 5 Rps18-ps3  |
| 4.75E-19 | -0.633259118 | 0.279 | 0.471 | 6.27E-15 | 5 Rps12-ps3  |
| 8.03E-19 | -0.81404854  | 0.073 | 0.258 | 1.06E-14 | 5 Fxyd5      |
| 9.34E-19 | 0.704388972  | 0.328 | 0.182 | 1.23E-14 | 5 Rrm2       |
| 1.65E-18 | -0.500383883 | 0.523 | 0.673 | 2.17E-14 | 5 Rps20      |
| 1.85E-18 | -0.469921167 | 0.475 | 0.65  | 2.44E-14 | 5 Sec61g     |
| 1.99E-18 | -0.504026673 | 0.441 | 0.621 | 2.63E-14 | 5 Rps21      |
| 3.15E-18 | -0.575629502 | 0.279 | 0.479 | 4.15E-14 | 5 Rpl30      |

|          |              |       |       |          |             |
|----------|--------------|-------|-------|----------|-------------|
| 3.25E-18 | -0.660505759 | 0.136 | 0.339 | 4.29E-14 | 5 Slc25a5   |
| 1.23E-17 | -0.412446549 | 0.607 | 0.737 | 1.63E-13 | 5 Rps25     |
| 1.32E-17 | -0.550777424 | 0.242 | 0.446 | 1.74E-13 | 5 Rpl5      |
| 1.55E-17 | -0.668495589 | 0.153 | 0.349 | 2.05E-13 | 5 Pomp      |
| 1.76E-17 | -0.44730812  | 0.473 | 0.663 | 2.32E-13 | 5 Atp5l     |
| 2.21E-17 | -0.589481919 | 0.302 | 0.489 | 2.91E-13 | 5 Rps26-ps1 |
| 2.48E-17 | -0.745711425 | 0.08  | 0.257 | 3.27E-13 | 5 Calr      |
| 2.90E-17 | -0.549789092 | 0.32  | 0.513 | 3.82E-13 | 5 Rpl7a     |
| 3.30E-17 | -0.3740177   | 0.667 | 0.801 | 4.36E-13 | 5 Gm9843    |
| 1.67E-16 | -0.706657389 | 0.177 | 0.358 | 2.20E-12 | 5 H2afy     |
| 1.75E-16 | -0.552333908 | 0.305 | 0.488 | 2.31E-12 | 5 Rpl27-ps3 |
| 2.16E-16 | -0.634930901 | 0.151 | 0.339 | 2.85E-12 | 5 Eif3f     |
| 2.20E-16 | -0.581053279 | 0.192 | 0.39  | 2.90E-12 | 5 Btf3      |
| 2.36E-16 | -0.70628609  | 0.181 | 0.372 | 3.12E-12 | 5 H2-K1     |
| 2.53E-16 | -0.64359961  | 0.136 | 0.319 | 3.34E-12 | 5 Polr2l    |
| 3.61E-16 | -0.327715434 | 0.816 | 0.877 | 4.76E-12 | 5 Rpl35a    |
| 3.74E-16 | 0.435749444  | 0.393 | 0.236 | 4.93E-12 | 5 Elane     |
| 9.31E-16 | -0.666139636 | 0.147 | 0.329 | 1.23E-11 | 5 Ptprc     |
| 2.41E-15 | 0.397117704  | 0.592 | 0.444 | 3.18E-11 | 5 Hp        |
| 2.89E-15 | -0.509385236 | 0.276 | 0.465 | 3.81E-11 | 5 Naca      |
| 3.74E-15 | -0.492932694 | 0.384 | 0.56  | 4.94E-11 | 5 Rpl7      |
| 6.01E-15 | -0.470689393 | 0.38  | 0.558 | 7.92E-11 | 5 Hspa8     |
| 7.68E-15 | 0.304342079  | 0.762 | 0.636 | 1.01E-10 | 5 Prdx5     |
| 7.77E-15 | -0.70564953  | 0.16  | 0.328 | 1.03E-10 | 5 Lsp1      |
| 1.31E-14 | -0.45435064  | 0.419 | 0.585 | 1.73E-10 | 5 Rpl36al   |
| 2.09E-14 | -0.369448669 | 0.631 | 0.754 | 2.76E-10 | 5 Rpl9      |
| 2.13E-14 | -0.393183981 | 0.564 | 0.715 | 2.81E-10 | 5 mt-Cytb   |
| 2.71E-14 | -0.321008764 | 0.786 | 0.865 | 3.57E-10 | 5 mt-Atp6   |
| 4.59E-14 | -0.541092871 | 0.156 | 0.331 | 6.06E-10 | 5 Gm10116   |
| 6.33E-14 | -0.688430561 | 0.11  | 0.266 | 8.35E-10 | 5 Ncl       |
| 6.64E-14 | 0.575658439  | 0.33  | 0.203 | 8.76E-10 | 5 Serpinb1a |

|          |              |       |       |          |            |
|----------|--------------|-------|-------|----------|------------|
| 7.18E-14 | 0.439446346  | 0.397 | 0.253 | 9.47E-10 | 5 Ncf1     |
| 7.21E-14 | -0.455723859 | 0.27  | 0.462 | 9.51E-10 | 5 Rpl9-ps6 |
| 7.35E-14 | -0.577606369 | 0.181 | 0.349 | 9.69E-10 | 5 Nop10    |
| 8.81E-14 | -0.548354819 | 0.203 | 0.369 | 1.16E-09 | 5 Snrpf    |
| 1.28E-13 | -0.533765589 | 0.287 | 0.446 | 1.68E-09 | 5 Gm9493   |
| 1.89E-13 | 0.284688248  | 0.592 | 0.417 | 2.50E-09 | 5 Anxa1    |
| 2.34E-13 | -0.475173951 | 0.33  | 0.489 | 3.09E-09 | 5 Rps27l   |
| 3.62E-13 | 0.518544868  | 0.257 | 0.141 | 4.77E-09 | 5 Lta4h    |
| 4.33E-13 | -0.384571729 | 0.497 | 0.642 | 5.71E-09 | 5 Uba52    |
| 4.52E-13 | -0.364772514 | 0.531 | 0.676 | 5.96E-09 | 5 Cox4i1   |
| 4.55E-13 | -0.470423308 | 0.192 | 0.363 | 6.00E-09 | 5 Rpl6l    |
| 6.74E-13 | -0.57520516  | 0.108 | 0.262 | 8.89E-09 | 5 Psmb8    |
| 8.17E-13 | -0.472021213 | 0.268 | 0.439 | 1.08E-08 | 5 Hint1    |
| 1.10E-12 | 0.474728093  | 0.335 | 0.204 | 1.45E-08 | 5 C3       |
| 1.11E-12 | -0.532582074 | 0.138 | 0.295 | 1.46E-08 | 5 Gm10269  |
| 1.12E-12 | -0.459223524 | 0.527 | 0.645 | 1.48E-08 | 5 Xist     |
| 2.09E-12 | 0.471004322  | 0.302 | 0.177 | 2.76E-08 | 5 Adpgk    |
| 2.53E-12 | -0.543852767 | 0.119 | 0.269 | 3.34E-08 | 5 Ucp2     |
| 3.06E-12 | -0.471806352 | 0.274 | 0.444 | 4.03E-08 | 5 Serinc3  |
| 6.32E-12 | -0.36767818  | 0.464 | 0.623 | 8.34E-08 | 5 Gm11808  |
| 7.74E-12 | -0.516799899 | 0.173 | 0.325 | 1.02E-07 | 5 Atp5g1   |
| 8.38E-12 | -0.513321658 | 0.175 | 0.329 | 1.11E-07 | 5 Eef1b2   |
| 1.42E-11 | -0.505536557 | 0.162 | 0.315 | 1.87E-07 | 5 mt-Nd2   |
| 1.42E-11 | -0.37025391  | 0.434 | 0.581 | 1.87E-07 | 5 mt-Nd4   |
| 1.65E-11 | -0.535436532 | 0.197 | 0.352 | 2.18E-07 | 5 Hsp90b1  |
| 1.79E-11 | -0.348867088 | 0.631 | 0.728 | 2.36E-07 | 5 Rps17    |
| 1.91E-11 | -0.524965051 | 0.147 | 0.295 | 2.52E-07 | 5 Nsa2     |
| 3.82E-11 | -0.587537257 | 0.147 | 0.289 | 5.04E-07 | 5 Slpi     |
| 4.10E-11 | -0.463046093 | 0.121 | 0.266 | 5.40E-07 | 5 Atp5c1   |
| 5.33E-11 | -0.288671101 | 0.575 | 0.706 | 7.04E-07 | 5 Oaz1     |
| 5.48E-11 | -0.421953709 | 0.33  | 0.481 | 7.23E-07 | 5 Rpl29    |

|          |              |       |       |             |           |
|----------|--------------|-------|-------|-------------|-----------|
| 5.65E-11 | -0.404699264 | 0.179 | 0.332 | 7.45E-07    | 5 Gm10036 |
| 9.36E-11 | -0.414424562 | 0.207 | 0.359 | 1.23E-06    | 5 Cox7b   |
| 9.42E-11 | 0.40632041   | 0.475 | 0.357 | 1.24E-06    | 5 Gsr     |
| 1.25E-10 | 0.481109632  | 0.281 | 0.173 | 1.65E-06    | 5 Ckap4   |
| 4.13E-10 | -0.466940603 | 0.119 | 0.252 | 5.45E-06    | 5 Zfp36l2 |
| 5.11E-10 | -0.446407163 | 0.136 | 0.272 | 6.74E-06    | 5 Snrpd2  |
| 6.18E-10 | -0.396319616 | 0.302 | 0.444 | 8.15E-06    | 5 Ybx1    |
| 6.66E-10 | -0.426711375 | 0.261 | 0.407 | 8.79E-06    | 5 mt-Atp8 |
| 7.55E-10 | 0.413784062  | 0.43  | 0.319 | 9.95E-06    | 5 Ap3s1   |
| 7.94E-10 | -0.369724434 | 0.339 | 0.493 | 1.05E-05    | 5 Uqcrh   |
| 9.29E-10 | -0.460786756 | 0.164 | 0.301 | 1.23E-05    | 5 Rsrp1   |
| 9.39E-10 | -0.380587924 | 0.253 | 0.403 | 1.24E-05    | 5 Gm8186  |
| 9.98E-10 | -0.374306946 | 0.629 | 0.721 | 1.32E-05    | 5 Fcer1g  |
| 1.04E-09 | -0.39221     | 0.369 | 0.516 | 1.37E-05    | 5 Rpl22l1 |
| 1.47E-09 | -0.370789228 | 0.395 | 0.547 | 1.93E-05    | 5 Mrpl33  |
| 1.51E-09 | 0.405459664  | 0.432 | 0.324 | 2.00E-05    | 5 Clec12a |
| 1.88E-09 | -0.416730419 | 0.16  | 0.297 | 2.47E-05    | 5 Psmb1   |
| 2.26E-09 | -0.346012516 | 0.263 | 0.408 | 2.98E-05    | 5 Tomm7   |
| 2.65E-09 | -0.480171686 | 0.171 | 0.304 | 3.49E-05    | 5 Sat1    |
| 2.72E-09 | -0.360751487 | 0.177 | 0.315 | 3.59E-05    | 5 Hnrnpm  |
| 3.27E-09 | -0.37895726  | 0.16  | 0.296 | 4.31E-05    | 5 Eif4a1  |
| 3.55E-09 | -0.405925128 | 0.207 | 0.351 | 4.68E-05    | 5 Ifitm2  |
| 3.79E-09 | 0.395535014  | 0.369 | 0.258 | 5.00E-05    | 5 Clec4a2 |
| 4.02E-09 | -0.381240394 | 0.177 | 0.311 | 5.30E-05    | 5 Erh     |
| 4.76E-09 | 0.391269571  | 0.425 | 0.316 | 6.27E-05    | 5 Scp2    |
| 4.97E-09 | -0.39263833  | 0.13  | 0.257 | 6.56E-05    | 5 Eif3h   |
| 5.85E-09 | -0.539786534 | 0.145 | 0.263 | 7.72E-05    | 5 Btg1    |
| 7.92E-09 | -0.425310164 | 0.235 | 0.373 | 0.000104461 | 5 Serp1   |
| 9.03E-09 | 0.423513438  | 0.387 | 0.286 | 0.00011907  | 5 Ppp1cb  |
| 9.73E-09 | -0.430342806 | 0.218 | 0.351 | 0.00012841  | 5 Set     |
| 1.00E-08 | -0.336826323 | 0.499 | 0.629 | 0.000132362 | 5 mt-Nd1  |

|          |              |       |       |             |                 |
|----------|--------------|-------|-------|-------------|-----------------|
| 1.18E-08 | -0.337923259 | 0.281 | 0.422 | 0.00015591  | 5 Chchd2        |
| 1.21E-08 | -0.344233396 | 0.136 | 0.265 | 0.000160076 | 5 Ndufb8        |
| 1.28E-08 | -0.383106894 | 0.184 | 0.317 | 0.000168742 | 5 Canx          |
| 2.59E-08 | -0.359909075 | 0.181 | 0.308 | 0.000341199 | 5 Atp5g2        |
| 3.04E-08 | -0.372535581 | 0.24  | 0.372 | 0.000401619 | 5 BC005537      |
| 3.80E-08 | -0.339038926 | 0.134 | 0.257 | 0.000501667 | 5 Rbm25         |
| 5.50E-08 | -0.322815524 | 0.279 | 0.416 | 0.000725632 | 5 Uqcrq         |
| 5.57E-08 | -0.357841958 | 0.14  | 0.258 | 0.000734518 | 5 Capzb         |
| 5.61E-08 | -0.334036594 | 0.356 | 0.488 | 0.000739576 | 5 Morf4l1       |
| 6.65E-08 | -0.301956766 | 0.328 | 0.468 | 0.000877612 | 5 Dynll1        |
| 9.15E-08 | 0.36158482   | 0.361 | 0.262 | 0.001207564 | 5 Gpi1          |
| 9.95E-08 | -0.353811263 | 0.317 | 0.436 | 0.001311938 | 5 Serbp1        |
| 1.10E-07 | -0.319909209 | 0.283 | 0.422 | 0.00145454  | 5 2010107E04Rik |
| 1.32E-07 | -0.325831354 | 0.276 | 0.414 | 0.001745314 | 5 Pfdn5         |
| 1.55E-07 | -0.394665773 | 0.171 | 0.287 | 0.002050443 | 5 Iqgap1        |
| 1.70E-07 | -0.362613498 | 0.322 | 0.44  | 0.002241218 | 5 Tspo          |
| 1.72E-07 | -0.339416529 | 0.158 | 0.277 | 0.002270456 | 5 Ndufb9        |
| 2.35E-07 | -0.985234303 | 0.356 | 0.486 | 0.003099257 | 5 Retnlg        |
| 2.36E-07 | -0.453957274 | 0.227 | 0.341 | 0.003116748 | 5 Notch2        |
| 2.78E-07 | -0.415188481 | 0.19  | 0.302 | 0.003671819 | 5 Laptm5        |
| 2.81E-07 | -0.342505691 | 0.173 | 0.286 | 0.003711563 | 5 Bola2         |
| 3.41E-07 | 0.328290746  | 0.495 | 0.418 | 0.004502823 | 5 Tkt           |
| 3.60E-07 | -0.322745016 | 0.147 | 0.261 | 0.004744113 | 5 Timm13        |
| 3.93E-07 | -0.414695478 | 0.158 | 0.264 | 0.005182009 | 5 Anxa2         |
| 4.19E-07 | 0.343486105  | 0.346 | 0.251 | 0.005523143 | 5 Lmo4          |
| 4.32E-07 | -0.352998212 | 0.225 | 0.344 | 0.005701782 | 5 Hnrnpa1       |
| 5.17E-07 | -0.317514562 | 0.205 | 0.323 | 0.00681615  | 5 Eif3k         |
| 5.94E-07 | -0.292490145 | 0.337 | 0.46  | 0.007841667 | 5 Uqcr11        |
| 7.64E-07 | -0.26551532  | 0.149 | 0.261 | 0.01007375  | 5 Eif3a         |
| 8.35E-07 | 0.348269552  | 0.311 | 0.223 | 0.011021064 | 5 Cpne3         |
| 9.23E-07 | 0.465146493  | 0.261 | 0.189 | 0.012173603 | 5 Tuba4a        |

|          |              |       |       |             |            |
|----------|--------------|-------|-------|-------------|------------|
| 1.03E-06 | -0.317662871 | 0.158 | 0.268 | 0.013600662 | 5 Atp5g3   |
| 1.07E-06 | -0.315511716 | 0.22  | 0.334 | 0.014061342 | 5 Hsp90aa1 |
| 1.12E-06 | -0.285970532 | 0.428 | 0.527 | 0.014709778 | 5 Snrpg    |
| 1.20E-06 | -0.286832011 | 0.266 | 0.395 | 0.015821972 | 5 Tmem258  |
| 1.27E-06 | -0.341156269 | 0.147 | 0.251 | 0.01673028  | 5 Atp5f1   |
| 1.29E-06 | 0.407925318  | 0.27  | 0.187 | 0.017012644 | 5 R3hdm4   |
| 1.32E-06 | -0.253990582 | 0.207 | 0.327 | 0.017406126 | 5 Nedd8    |
| 1.32E-06 | -0.324099941 | 0.186 | 0.295 | 0.017449575 | 5 Clta     |
| 1.34E-06 | -0.307053989 | 0.296 | 0.413 | 0.017627248 | 5 Ndufa13  |
| 1.44E-06 | -0.270166559 | 0.177 | 0.29  | 0.018930187 | 5 Atp5b    |
| 1.77E-06 | -0.306916965 | 0.177 | 0.286 | 0.023309355 | 5 Atp6v1g1 |
| 1.96E-06 | 0.394027663  | 0.313 | 0.235 | 0.025799364 | 5 Rnaseh2c |
| 2.03E-06 | -0.332094888 | 0.222 | 0.333 | 0.026761368 | 5 Ranbp1   |
| 2.21E-06 | 0.373760684  | 0.356 | 0.282 | 0.029099416 | 5 Ndufv3   |
| 2.89E-06 | -0.31500228  | 0.192 | 0.301 | 0.038122948 | 5 Nap1l1   |
| 3.25E-06 | 0.299032587  | 0.296 | 0.207 | 0.042809661 | 5 Cd177    |
| 4.44E-06 | -0.269435745 | 0.346 | 0.459 | 0.058548065 | 5 Usmg5    |
| 4.98E-06 | 0.408521189  | 0.354 | 0.283 | 0.065742407 | 5 Lrrc58   |
| 5.07E-06 | -0.263642067 | 0.3   | 0.42  | 0.066863009 | 5 Atox1    |
| 5.30E-06 | -0.257359016 | 0.197 | 0.306 | 0.069922864 | 5 Ndufc1   |
| 5.38E-06 | -0.268415991 | 0.274 | 0.391 | 0.070975414 | 5 Minos1   |
| 5.90E-06 | -0.277143737 | 0.313 | 0.425 | 0.077852786 | 5 Cdc42    |
| 6.20E-06 | -0.308775781 | 0.212 | 0.32  | 0.081749417 | 5 Cysc     |
| 6.53E-06 | 0.274289491  | 0.525 | 0.465 | 0.086143668 | 5 Txn1     |
| 6.96E-06 | 0.281093595  | 0.371 | 0.29  | 0.091824562 | 5 Cd24a    |
| 7.30E-06 | 0.301652728  | 0.389 | 0.313 | 0.09625743  | 5 Top2a    |
| 8.56E-06 | -0.279008838 | 0.229 | 0.334 | 0.112892575 | 5 Ndufa7   |
| 9.61E-06 | -0.251090375 | 0.369 | 0.483 | 0.126814198 | 5 H2afj    |
| 1.00E-05 | -0.43178563  | 0.168 | 0.256 | 0.132482776 | 5 Tmcc1    |
| 1.05E-05 | -0.292346442 | 0.179 | 0.277 | 0.13825732  | 5 Dazap2   |
| 1.16E-05 | -0.294525195 | 0.179 | 0.278 | 0.152399399 | 5 Romo1    |

|            |              |       |       |             |   |               |
|------------|--------------|-------|-------|-------------|---|---------------|
| 1.32E-05   | -0.293202545 | 0.166 | 0.263 | 0.174349101 | 5 | Vim           |
| 1.38E-05   | -0.289128926 | 0.173 | 0.271 | 0.181814494 | 5 | Gnas          |
| 1.51E-05   | -0.352348032 | 0.199 | 0.291 | 0.199029301 | 5 | Cmtm7         |
| 1.80E-05   | 0.449723144  | 0.281 | 0.214 | 0.23678271  | 5 | Hnrnpul1      |
| 2.39E-05   | 0.26384953   | 0.514 | 0.46  | 0.31582521  | 5 | Rac2          |
| 2.58E-05   | -0.26037136  | 0.356 | 0.458 | 0.340115731 | 5 | Alox5ap       |
| 2.82E-05   | 0.261115007  | 0.402 | 0.328 | 0.37157002  | 5 | 2810417H13Rik |
| 3.07E-05   | -0.320749008 | 0.266 | 0.363 | 0.405446746 | 5 | Gm42418       |
| 3.56E-05   | -0.301587283 | 0.257 | 0.355 | 0.469823966 | 5 | Ptpn18        |
| 7.62E-05   | -0.252863453 | 0.168 | 0.256 | 1           | 5 | Psemb3        |
| 9.27E-05   | -0.26974932  | 0.317 | 0.41  | 1           | 5 | Dbi           |
| 0.00010112 | -0.251724434 | 0.685 | 0.734 | 1           | 5 | Cd52          |
| 0.0001683  | -0.280689137 | 0.201 | 0.283 | 1           | 5 | Reep5         |
| 0.00022536 | 0.250909154  | 0.467 | 0.421 | 1           | 5 | Arpp19        |
| 0.0002523  | -0.266984759 | 0.544 | 0.62  | 1           | 5 | Ly6c2         |
| 0.00028143 | -0.255219872 | 0.179 | 0.257 | 1           | 5 | Ndufb2        |
| 0.00049289 | 0.277344165  | 0.27  | 0.206 | 1           | 5 | Mcemp1        |
| 0.00049739 | 0.291307633  | 0.328 | 0.27  | 1           | 5 | Aldh2         |
| 0.00051224 | -0.283205817 | 0.292 | 0.37  | 1           | 5 | Lst1          |
| 0.00076668 | 0.320010758  | 0.283 | 0.231 | 1           | 5 | Abhd2         |
| 0.00110563 | 0.30629115   | 0.261 | 0.214 | 1           | 5 | Mki67         |
| 0.00143278 | 0.353329928  | 0.268 | 0.226 | 1           | 5 | Smc2          |
| 0.00201372 | -0.294564928 | 0.201 | 0.262 | 1           | 5 | Cebpb         |
| 0.00570131 | -0.311683858 | 0.307 | 0.364 | 1           | 5 | Ifitm6        |
| 1.22E-137  | 0.985181641  | 1     | 0.72  | 1.61E-133   | 6 | Tmsb10        |
| 1.31E-120  | 0.997834288  | 0.974 | 0.611 | 1.73E-116   | 6 | Crip1         |
| 1.14E-74   | 0.954086485  | 0.603 | 0.238 | 1.51E-70    | 6 | S100a10       |
| 8.26E-72   | 0.567980368  | 0.972 | 0.832 | 1.09E-67    | 6 | Ptma          |
| 1.58E-60   | 0.821387136  | 0.638 | 0.292 | 2.08E-56    | 6 | Ms4a6c        |
| 8.09E-58   | 0.673148559  | 0.792 | 0.453 | 1.07E-53    | 6 | Lgals1        |
| 3.69E-57   | 0.679899797  | 0.837 | 0.597 | 4.87E-53    | 6 | Ly6c2         |

**Mono**



|          |              |       |       |          |                 |
|----------|--------------|-------|-------|----------|-----------------|
| 2.07E-52 | 0.830610379  | 0.497 | 0.2   | 2.72E-48 | 6 F13a1         |
| 6.02E-49 | 0.739279     | 0.54  | 0.236 | 7.95E-45 | 6 Gm9844        |
| 2.39E-46 | -1.805390289 | 0.397 | 0.648 | 3.16E-42 | 6 Wfdc21        |
| 2.65E-46 | 0.458131852  | 0.941 | 0.811 | 3.49E-42 | 6 Ftl1          |
| 3.75E-46 | 0.506789049  | 0.857 | 0.615 | 4.94E-42 | 6 Cst3          |
| 1.72E-45 | 0.77685158   | 0.618 | 0.349 | 2.27E-41 | 6 Dek           |
| 3.13E-43 | 0.837471603  | 0.573 | 0.315 | 4.13E-39 | 6 2810417H13Rik |
| 6.31E-43 | 0.606113476  | 0.725 | 0.416 | 8.32E-39 | 6 Lgals3        |
| 5.07E-42 | -1.881160199 | 0.987 | 0.995 | 6.69E-38 | 6 S100a9        |
| 9.50E-42 | -1.543024791 | 0.169 | 0.469 | 1.25E-37 | 6 Pglyrp1       |
| 8.55E-41 | 0.472018552  | 0.926 | 0.768 | 1.13E-36 | 6 Hmgb2         |
| 2.80E-40 | 0.463844556  | 0.92  | 0.782 | 3.69E-36 | 6 Ppia          |
| 2.84E-40 | 0.763654548  | 0.258 | 0.076 | 3.75E-36 | 6 Klf4          |
| 4.09E-40 | -1.793391255 | 0.879 | 0.935 | 5.40E-36 | 6 Camp          |
| 4.39E-40 | -1.644151002 | 0.293 | 0.56  | 5.79E-36 | 6 Ltf           |
| 1.97E-39 | 0.833458114  | 0.62  | 0.367 | 2.60E-35 | 6 Hist1h2ap     |
| 2.60E-39 | -1.844125373 | 0.764 | 0.856 | 3.43E-35 | 6 Ngp           |
| 5.69E-39 | 0.501870254  | 0.811 | 0.522 | 7.51E-35 | 6 Psap          |
| 2.26E-38 | 0.424207533  | 0.946 | 0.81  | 2.98E-34 | 6 H2afz         |
| 2.69E-38 | 0.507048493  | 1     | 0.999 | 3.55E-34 | 6 Actb          |
| 6.41E-37 | 0.456042627  | 0.816 | 0.51  | 8.46E-33 | 6 S100a6        |
| 1.08E-36 | 0.610875313  | 0.681 | 0.431 | 1.42E-32 | 6 Psma7         |
| 1.09E-35 | -1.776268892 | 0.998 | 0.999 | 1.43E-31 | 6 S100a8        |
| 1.63E-35 | 0.461827958  | 0.87  | 0.677 | 2.15E-31 | 6 Hmgb1         |
| 1.77E-35 | 0.736308854  | 0.26  | 0.085 | 2.34E-31 | 6 C1galt1c1     |
| 6.26E-35 | -1.61062819  | 0.345 | 0.575 | 8.26E-31 | 6 Lcn2          |
| 3.50E-34 | 0.598969151  | 0.46  | 0.208 | 4.61E-30 | 6 S100a4        |
| 5.83E-31 | 0.695121481  | 0.46  | 0.242 | 7.69E-27 | 6 Cebpb         |
| 1.55E-29 | 0.580071339  | 0.644 | 0.412 | 2.05E-25 | 6 Prdx1         |
| 2.32E-29 | 0.597690584  | 0.69  | 0.483 | 3.05E-25 | 6 Tubb5         |
| 5.31E-29 | 0.649202791  | 0.568 | 0.354 | 7.00E-25 | 6 Myh9          |

|          |              |       |       |          |   |           |
|----------|--------------|-------|-------|----------|---|-----------|
| 6.32E-27 | 0.584165276  | 0.597 | 0.388 | 8.33E-23 | 6 | Dbi       |
| 2.34E-25 | 0.777435383  | 0.28  | 0.12  | 3.08E-21 | 6 | Hist1h2ae |
| 2.80E-25 | 0.593580612  | 0.395 | 0.196 | 3.70E-21 | 6 | Fn1       |
| 1.47E-24 | 0.321565433  | 0.931 | 0.765 | 1.94E-20 | 6 | Rpl39     |
| 2.12E-24 | 0.3574441879 | 0.866 | 0.713 | 2.80E-20 | 6 | Rps26     |
| 2.20E-24 | -0.483921926 | 0.998 | 0.997 | 2.90E-20 | 6 | Malat1    |
| 6.75E-23 | 0.376837049  | 0.813 | 0.697 | 8.90E-19 | 6 | Sub1      |
| 2.50E-22 | 0.558638444  | 0.551 | 0.353 | 3.29E-18 | 6 | Tuba1b    |
| 2.11E-21 | 0.593340201  | 0.508 | 0.32  | 2.78E-17 | 6 | Notch2    |
| 3.94E-21 | 0.524957227  | 0.584 | 0.414 | 5.20E-17 | 6 | Hint1     |
| 1.73E-20 | 0.375816842  | 0.471 | 0.259 | 2.28E-16 | 6 | Ccr2      |
| 5.81E-20 | 0.553718893  | 0.375 | 0.2   | 7.67E-16 | 6 | Ahnak     |
| 6.23E-20 | 0.504711     | 0.575 | 0.401 | 8.21E-16 | 6 | Stmn1     |
| 1.33E-19 | 0.4372617    | 0.688 | 0.524 | 1.75E-15 | 6 | Mrpl33    |
| 2.58E-18 | 0.383939608  | 0.636 | 0.456 | 3.41E-14 | 6 | Ly6e      |
| 2.80E-18 | 0.319089959  | 0.839 | 0.737 | 3.69E-14 | 6 | Gpx1      |
| 5.65E-17 | 0.529182254  | 0.356 | 0.199 | 7.45E-13 | 6 | Lamp1     |
| 7.29E-17 | 0.463257326  | 0.568 | 0.421 | 9.61E-13 | 6 | Tspo      |
| 1.67E-16 | 0.47719878   | 0.338 | 0.184 | 2.20E-12 | 6 | Emb       |
| 1.75E-16 | -0.9116777   | 0.193 | 0.373 | 2.30E-12 | 6 | Ifitm6    |
| 1.78E-16 | 0.409945559  | 0.664 | 0.524 | 2.35E-12 | 6 | Atp5k     |
| 1.98E-16 | 0.618097554  | 0.319 | 0.177 | 2.62E-12 | 6 | Cap1      |
| 5.49E-16 | -0.789685181 | 0.275 | 0.441 | 7.24E-12 | 6 | Anxa1     |
| 5.62E-16 | 0.284363424  | 0.837 | 0.712 | 7.42E-12 | 6 | Rps17     |
| 5.89E-16 | 0.522752357  | 0.453 | 0.302 | 7.77E-12 | 6 | Cycs      |
| 6.37E-16 | 0.486488355  | 0.466 | 0.307 | 8.41E-12 | 6 | Gm10116   |
| 1.56E-15 | 0.523586562  | 0.358 | 0.21  | 2.06E-11 | 6 | Gm2a      |
| 3.22E-15 | 0.374124386  | 0.664 | 0.496 | 4.25E-11 | 6 | Cbx3      |
| 4.73E-15 | 0.482309548  | 0.38  | 0.229 | 6.23E-11 | 6 | Pycard    |
| 4.86E-15 | 0.431850581  | 0.403 | 0.245 | 6.41E-11 | 6 | Anxa2     |
| 9.84E-15 | -0.689261488 | 0.141 | 0.308 | 1.30E-10 | 6 | Cd24a     |

|          |             |       |       |          |             |
|----------|-------------|-------|-------|----------|-------------|
| 1.35E-14 | 0.436942373 | 0.514 | 0.365 | 1.78E-10 | 6 H2afv     |
| 1.76E-14 | 0.263601021 | 0.855 | 0.711 | 2.32E-10 | 6 Rpl6      |
| 3.33E-14 | 0.256797106 | 0.844 | 0.719 | 4.40E-10 | 6 Rps25     |
| 7.75E-14 | 0.400961882 | 0.51  | 0.357 | 1.02E-09 | 6 Capza2    |
| 8.10E-14 | 0.500766565 | 0.258 | 0.135 | 1.07E-09 | 6 Anxa5     |
| 8.56E-14 | 0.313195415 | 0.768 | 0.68  | 1.13E-09 | 6 Actg1     |
| 1.64E-13 | 0.267076597 | 0.742 | 0.611 | 2.17E-09 | 6 mt-Nd1    |
| 2.27E-13 | 0.470445682 | 0.456 | 0.315 | 3.00E-09 | 6 Ranbp1    |
| 2.52E-13 | 0.463602715 | 0.39  | 0.245 | 3.32E-09 | 6 Vim       |
| 3.37E-13 | 0.407855451 | 0.414 | 0.267 | 4.45E-09 | 6 Reep5     |
| 6.18E-13 | 0.340758427 | 0.633 | 0.505 | 8.15E-09 | 6 Cox6a1    |
| 8.22E-13 | 0.279991398 | 0.759 | 0.621 | 1.08E-08 | 6 Uba52     |
| 8.52E-13 | 0.269264384 | 0.852 | 0.769 | 1.12E-08 | 6 H3f3a     |
| 8.96E-13 | 0.454728204 | 0.341 | 0.206 | 1.18E-08 | 6 Erp29     |
| 1.18E-12 | 0.250748608 | 0.809 | 0.648 | 1.55E-08 | 6 Eef1a1    |
| 1.36E-12 | 0.347710656 | 0.681 | 0.559 | 1.79E-08 | 6 Hnrnpa2b1 |
| 1.62E-12 | 0.411217965 | 0.469 | 0.325 | 2.14E-08 | 6 Hnrnpa1   |
| 2.39E-12 | 0.509570181 | 0.41  | 0.279 | 3.15E-08 | 6 Lrrc58    |
| 2.64E-12 | 0.404761978 | 0.49  | 0.353 | 3.48E-08 | 6 BC005537  |
| 4.62E-12 | 0.438127635 | 0.523 | 0.399 | 6.09E-08 | 6 Anp32b    |
| 7.71E-12 | 0.369732027 | 0.618 | 0.513 | 1.02E-07 | 6 Atp5h     |
| 8.45E-12 | 0.466420785 | 0.44  | 0.309 | 1.11E-07 | 6 Top2a     |
| 9.19E-12 | 0.388825503 | 0.557 | 0.433 | 1.21E-07 | 6 Actr2     |
| 1.02E-11 | 0.278759335 | 0.725 | 0.602 | 1.35E-07 | 6 Gm11808   |
| 3.53E-11 | 0.293447723 | 0.659 | 0.516 | 4.66E-07 | 6 Rpl22     |
| 6.66E-11 | 0.514853192 | 0.325 | 0.216 | 8.78E-07 | 6 Snrpd1    |
| 6.87E-11 | 0.348667669 | 0.592 | 0.466 | 9.06E-07 | 6 Rps26-ps1 |
| 7.84E-11 | 0.338356589 | 0.449 | 0.312 | 1.03E-06 | 6 Npc2      |
| 8.80E-11 | 0.350174296 | 0.341 | 0.211 | 1.16E-06 | 6 Selplg    |
| 1.05E-10 | 0.493745647 | 0.39  | 0.277 | 1.39E-06 | 6 Tmpo      |
| 1.58E-10 | 0.325623943 | 0.588 | 0.466 | 2.08E-06 | 6 H2afj     |

|          |              |       |       |             |   |          |
|----------|--------------|-------|-------|-------------|---|----------|
| 1.62E-10 | 0.260286157  | 0.768 | 0.687 | 2.14E-06    | 6 | Sh3bgrl3 |
| 1.64E-10 | -0.382540384 | 0.321 | 0.477 | 2.17E-06    | 6 | Cd47     |
| 1.66E-10 | 0.328064464  | 0.655 | 0.548 | 2.20E-06    | 6 | Calm1    |
| 2.30E-10 | 0.325757671  | 0.473 | 0.335 | 3.03E-06    | 6 | H2afy    |
| 3.24E-10 | 0.359932531  | 0.536 | 0.419 | 4.27E-06    | 6 | Rbm3     |
| 7.85E-10 | 0.259098179  | 0.744 | 0.659 | 1.04E-05    | 6 | Cox4i1   |
| 1.05E-09 | 0.348035221  | 0.479 | 0.357 | 1.39E-05    | 6 | Emp3     |
| 1.23E-09 | 0.297957875  | 0.625 | 0.512 | 1.62E-05    | 6 | Snrpg    |
| 1.27E-09 | 0.376761376  | 0.495 | 0.382 | 1.68E-05    | 6 | Smdt1    |
| 1.33E-09 | 0.306437597  | 0.547 | 0.435 | 1.76E-05    | 6 | Hnrnpf   |
| 1.74E-09 | 0.268581563  | 0.677 | 0.566 | 2.30E-05    | 6 | Rpl36al  |
| 2.30E-09 | 0.352919126  | 0.503 | 0.383 | 3.04E-05    | 6 | Gm8186   |
| 2.52E-09 | 0.342914756  | 0.471 | 0.358 | 3.32E-05    | 6 | Ran      |
| 2.59E-09 | 0.332884232  | 0.549 | 0.443 | 3.41E-05    | 6 | Hnrnpa3  |
| 3.23E-09 | 0.447546021  | 0.28  | 0.177 | 4.25E-05    | 6 | Fam96a   |
| 4.75E-09 | 0.462822225  | 0.338 | 0.234 | 6.27E-05    | 6 | Msn      |
| 4.93E-09 | 0.32176491   | 0.449 | 0.328 | 6.51E-05    | 6 | Clic1    |
| 1.37E-08 | 0.464110586  | 0.295 | 0.199 | 0.000180911 | 6 | Birc5    |
| 1.46E-08 | 0.275997621  | 0.636 | 0.538 | 0.000192349 | 6 | Hspa8    |
| 1.52E-08 | 0.400768443  | 0.321 | 0.222 | 0.000200866 | 6 | Smc2     |
| 2.22E-08 | 0.254888893  | 0.696 | 0.619 | 0.000293132 | 6 | Cox6c    |
| 2.37E-08 | 0.335809424  | 0.438 | 0.328 | 0.000313193 | 6 | Nucks1   |
| 2.82E-08 | 0.369066123  | 0.525 | 0.429 | 0.000372534 | 6 | Rhoa     |
| 2.96E-08 | 0.319084702  | 0.544 | 0.453 | 0.00039025  | 6 | Ndufa2   |
| 3.49E-08 | 0.356619431  | 0.451 | 0.35  | 0.000459858 | 6 | Snrpf    |
| 7.18E-08 | 0.282299608  | 0.54  | 0.432 | 0.000946969 | 6 | Gm10073  |
| 7.18E-08 | 0.413051543  | 0.345 | 0.25  | 0.000947741 | 6 | Alyref   |
| 8.90E-08 | 0.295998965  | 0.557 | 0.471 | 0.0011737   | 6 | Rps27l   |
| 2.08E-07 | -0.38969913  | 0.412 | 0.508 | 0.002744529 | 6 | Cybb     |
| 2.08E-07 | 0.408038944  | 0.291 | 0.199 | 0.00274604  | 6 | Tacc1    |
| 2.12E-07 | 0.326763346  | 0.412 | 0.317 | 0.002792955 | 6 | Slc25a5  |

|          |              |       |       |             |                 |
|----------|--------------|-------|-------|-------------|-----------------|
| 2.77E-07 | 0.353200522  | 0.347 | 0.251 | 0.003649302 | 6 Ucp2          |
| 4.28E-07 | 0.378184633  | 0.26  | 0.176 | 0.00564499  | 6 Pdna          |
| 4.45E-07 | 0.322767031  | 0.462 | 0.366 | 0.005863581 | 6 Srrm2         |
| 5.07E-07 | -0.425495916 | 0.165 | 0.271 | 0.00669247  | 6 Ncf1          |
| 5.66E-07 | 0.314539139  | 0.466 | 0.386 | 0.007465589 | 6 Ywhaz         |
| 5.72E-07 | -0.529863427 | 0.514 | 0.555 | 0.007541864 | 6 Chil3         |
| 7.08E-07 | 0.314790791  | 0.436 | 0.342 | 0.009335492 | 6 Cox7b         |
| 7.43E-07 | 0.267803928  | 0.427 | 0.328 | 0.009803565 | 6 Pomp          |
| 8.76E-07 | 0.342957015  | 0.299 | 0.211 | 0.011551934 | 6 Mki67         |
| 1.22E-06 | -0.260500988 | 0.592 | 0.67  | 0.016110772 | 6 Arhgdib       |
| 1.46E-06 | 0.36427932   | 0.36  | 0.274 | 0.019258962 | 6 Anapc13       |
| 1.47E-06 | 0.251475119  | 0.644 | 0.554 | 0.019404998 | 6 Calm2         |
| 1.50E-06 | 0.311081674  | 0.304 | 0.216 | 0.019787126 | 6 Rbm8a         |
| 1.63E-06 | 0.310585078  | 0.484 | 0.4   | 0.021436224 | 6 Uqcrq         |
| 1.84E-06 | 0.306897623  | 0.451 | 0.366 | 0.024287393 | 6 Srsf2         |
| 2.24E-06 | 0.350406655  | 0.252 | 0.175 | 0.02954791  | 6 Dnmt1         |
| 2.75E-06 | 0.394097498  | 0.302 | 0.224 | 0.036266943 | 6 Anp32e        |
| 3.92E-06 | 0.257184806  | 0.562 | 0.484 | 0.051707045 | 6 Gnai2         |
| 5.79E-06 | 0.302497085  | 0.317 | 0.23  | 0.076352914 | 6 Zeb2          |
| 5.80E-06 | 0.381245365  | 0.289 | 0.213 | 0.076454083 | 6 Hnrnpul1      |
| 7.40E-06 | 0.418416665  | 0.308 | 0.234 | 0.097570618 | 6 Cks1b         |
| 7.70E-06 | 0.387996106  | 0.334 | 0.258 | 0.101528092 | 6 Prrc2c        |
| 9.66E-06 | 0.333586782  | 0.262 | 0.184 | 0.127476979 | 6 2700094K13Rik |
| 1.07E-05 | 0.38586687   | 0.319 | 0.244 | 0.140778787 | 6 Sec11c        |
| 1.07E-05 | 0.313865094  | 0.377 | 0.298 | 0.141348606 | 6 Uqcrb         |
| 1.09E-05 | -0.289232827 | 0.178 | 0.276 | 0.144033798 | 6 Gpi1          |
| 1.29E-05 | -0.265022663 | 0.36  | 0.472 | 0.169836193 | 6 Rac2          |
| 1.49E-05 | 0.324943483  | 0.358 | 0.281 | 0.197161793 | 6 Clta          |
| 1.67E-05 | 0.346010176  | 0.256 | 0.184 | 0.219989736 | 6 Psmb2         |
| 1.88E-05 | 0.364347505  | 0.345 | 0.273 | 0.247644791 | 6 mt-Nd4l       |
| 2.09E-05 | 0.36208124   | 0.306 | 0.236 | 0.275537988 | 6 Ube2s         |

|            |              |       |       |             |           |
|------------|--------------|-------|-------|-------------|-----------|
| 2.24E-05   | -0.344727009 | 0.191 | 0.281 | 0.295606841 | 6 Aldh2   |
| 2.39E-05   | 0.301591247  | 0.38  | 0.3   | 0.315284539 | 6 Polr2l  |
| 2.44E-05   | 0.297130479  | 0.273 | 0.198 | 0.322305309 | 6 Ssr4    |
| 2.75E-05   | 0.300408526  | 0.362 | 0.288 | 0.363303614 | 6 Nap1l1  |
| 3.78E-05   | 0.276598146  | 0.354 | 0.273 | 0.498535762 | 6 Slpi    |
| 3.82E-05   | 0.317780715  | 0.254 | 0.184 | 0.50377469  | 6 Thoc7   |
| 4.42E-05   | -0.391102806 | 0.547 | 0.591 | 0.583221881 | 6 Hmgn2   |
| 5.97E-05   | 0.265073894  | 0.369 | 0.293 | 0.786928098 | 6 Ndufc1  |
| 6.71E-05   | 0.281257596  | 0.295 | 0.221 | 0.88571243  | 6 Cxcr4   |
| 6.88E-05   | 0.305738764  | 0.351 | 0.281 | 0.907622353 | 6 Eif4a1  |
| 8.05E-05   | 0.293730568  | 0.384 | 0.306 | 1           | 6 Arf5    |
| 8.28E-05   | 0.289771361  | 0.399 | 0.327 | 1           | 6 Lsm5    |
| 8.96E-05   | 0.333815826  | 0.262 | 0.199 | 1           | 6 Supt16  |
| 9.43E-05   | -0.31677105  | 0.334 | 0.24  | 1           | 6 Elane   |
| 0.00010741 | 0.317854847  | 0.286 | 0.22  | 1           | 6 Rpgrip1 |
| 0.00011854 | 0.301855031  | 0.321 | 0.251 | 1           | 6 Wtap    |
| 0.00012508 | 0.290150901  | 0.321 | 0.252 | 1           | 6 Mtpn    |
| 0.00013201 | 0.306354684  | 0.338 | 0.272 | 1           | 6 Rac1    |
| 0.00013749 | 0.264492768  | 0.536 | 0.486 | 1           | 6 Arpc2   |
| 0.00025165 | 0.321065227  | 0.26  | 0.2   | 1           | 6 Cmpk1   |
| 0.00025904 | 0.310937142  | 0.334 | 0.277 | 1           | 6 Hnrnpab |
| 0.00030864 | 0.271339857  | 0.358 | 0.298 | 1           | 6 Ndufb11 |
| 0.00034563 | 0.252051254  | 0.28  | 0.216 | 1           | 6 Gm10250 |
| 0.00045756 | 0.295492165  | 0.26  | 0.202 | 1           | 6 Ndufa5  |
| 0.00053545 | 0.30925888   | 0.273 | 0.215 | 1           | 6 Ssr1    |
| 0.00068096 | 0.268259094  | 0.299 | 0.242 | 1           | 6 S100a13 |
| 0.00085011 | 0.282308109  | 0.43  | 0.375 | 1           | 6 Lbr     |
| 0.00089961 | 0.284471238  | 0.349 | 0.297 | 1           | 6 Tpm3    |
| 0.00090743 | 0.271276939  | 0.26  | 0.204 | 1           | 6 Hnrnpd  |
| 0.00104167 | 0.272689792  | 0.312 | 0.261 | 1           | 6 Snrpb   |
| 0.00108862 | 0.276904537  | 0.323 | 0.269 | 1           | 6 Atp5o   |

|            |              |       |       |   |   |         |
|------------|--------------|-------|-------|---|---|---------|
| 0.00125832 | 0.271321758  | 0.336 | 0.285 | 1 | 6 | Ywhah   |
| 0.00126089 | 0.283341289  | 0.338 | 0.28  | 1 | 6 | Nsa2    |
| 0.00134383 | 0.251777857  | 0.275 | 0.222 | 1 | 6 | Fam111a |
| 0.00141518 | 0.252304492  | 0.273 | 0.217 | 1 | 6 | Ndufa11 |
| 0.00197061 | 0.288071758  | 0.28  | 0.226 | 1 | 6 | Sptssa  |
| 0.00345879 | -0.339357316 | 0.625 | 0.644 | 1 | 6 | Fth1    |
| 0.00404581 | 0.258342706  | 0.291 | 0.247 | 1 | 6 | Psmb3   |
| 0.00431709 | -0.89253415  | 0.423 | 0.481 | 1 | 6 | Retnlg  |
| 0.00449911 | 0.294882184  | 0.258 | 0.214 | 1 | 6 | Birc6   |
| 0.00472777 | 0.273718461  | 0.258 | 0.211 | 1 | 6 | Rad21   |
| 0.00539664 | 0.261345344  | 0.28  | 0.235 | 1 | 6 | Ptges3  |
| 0.00977093 | 0.252963513  | 0.262 | 0.218 | 1 | 6 | Sf3b6   |

|           |              |       |       |           |   |        |
|-----------|--------------|-------|-------|-----------|---|--------|
| 5.72E-201 | 1.430937501  | 0.407 | 0.039 | 7.54E-197 | 7 | Sox4   |
| 6.61E-166 | -1.183805715 | 0.968 | 0.998 | 8.72E-162 | 7 | Tmsb4x |
| 4.10E-137 | 1.322007412  | 0.434 | 0.072 | 5.41E-133 | 7 | Ccnd2  |
| 1.44E-121 | 1.372204521  | 0.544 | 0.132 | 1.91E-117 | 7 | Cdk6   |
| 2.05E-115 | 0.829047106  | 0.983 | 0.751 | 2.70E-111 | 7 | Rpl36  |
| 1.07E-108 | 0.701124195  | 0.995 | 0.89  | 1.41E-104 | 7 | Rps19  |
| 1.39E-105 | 0.7342617    | 0.993 | 0.859 | 1.83E-101 | 7 | Rpl32  |
| 2.21E-103 | -1.784055486 | 0.73  | 0.918 | 2.91E-99  | 7 | Lyz2   |
| 2.06E-101 | -1.447614108 | 0.431 | 0.841 | 2.71E-97  | 7 | Tyrobp |
| 2.87E-101 | 0.916221315  | 0.936 | 0.617 | 3.79E-97  | 7 | Xist   |
| 1.46E-99  | 0.727053274  | 0.995 | 0.825 | 1.92E-95  | 7 | Rps18  |
| 3.78E-97  | 0.687443035  | 0.995 | 0.841 | 4.99E-93  | 7 | Rpl13  |
| 4.70E-95  | 1.142810885  | 0.27  | 0.037 | 6.20E-91  | 7 | Ifitm1 |
| 7.76E-95  | 0.667881799  | 0.995 | 0.874 | 1.02E-90  | 7 | Rps14  |
| 1.49E-93  | 0.667288326  | 0.99  | 0.866 | 1.97E-89  | 7 | Rpl18a |
| 5.27E-93  | 0.643290936  | 0.99  | 0.849 | 6.95E-89  | 7 | Rpl35  |
| 1.32E-90  | 0.788964561  | 0.966 | 0.667 | 1.75E-86  | 7 | Rpl14  |
| 1.52E-88  | 0.603899339  | 0.995 | 0.896 | 2.01E-84  | 7 | Rpl37  |
| 1.53E-87  | -1.494418645 | 0.333 | 0.757 | 2.02E-83  | 7 | Cd52   |

Mac?

|          |              |       |       |          |          |
|----------|--------------|-------|-------|----------|----------|
| 1.72E-86 | 0.66537477   | 0.98  | 0.826 | 2.27E-82 | 7 Rps8   |
| 6.77E-86 | 0.720896742  | 0.988 | 0.771 | 8.93E-82 | 7 Rps5   |
| 2.38E-85 | 0.563751562  | 0.998 | 0.895 | 3.14E-81 | 7 Rps28  |
| 2.57E-85 | 0.694198441  | 0.968 | 0.759 | 3.39E-81 | 7 Rps3a1 |
| 5.89E-85 | 0.743124906  | 0.971 | 0.709 | 7.77E-81 | 7 Rps4x  |
| 1.07E-80 | 0.747098709  | 0.949 | 0.624 | 1.41E-76 | 7 Rpl36a |
| 8.63E-80 | 0.688214308  | 0.973 | 0.732 | 1.14E-75 | 7 Rps6   |
| 1.89E-76 | 0.505389768  | 1     | 0.934 | 2.49E-72 | 7 Rpl37a |
| 1.96E-76 | 0.645465797  | 0.98  | 0.763 | 2.59E-72 | 7 Rpl39  |
| 1.63E-74 | 0.644578214  | 0.961 | 0.755 | 2.15E-70 | 7 Rpl21  |
| 3.38E-73 | 0.615560362  | 0.968 | 0.794 | 4.46E-69 | 7 Rps24  |
| 1.60E-72 | 0.614555553  | 0.973 | 0.768 | 2.11E-68 | 7 Rpl26  |
| 5.47E-72 | 0.670946168  | 0.963 | 0.726 | 7.21E-68 | 7 Rpl23  |
| 5.63E-72 | 0.700419914  | 0.953 | 0.674 | 7.43E-68 | 7 Rps7   |
| 2.63E-71 | -1.243495123 | 0.348 | 0.739 | 3.47E-67 | 7 Fcer1g |
| 8.90E-71 | 0.659536422  | 0.961 | 0.749 | 1.17E-66 | 7 Rpl17  |
| 2.48E-70 | 0.672996268  | 0.953 | 0.731 | 3.27E-66 | 7 Rpl9   |
| 6.59E-69 | 0.849439965  | 0.811 | 0.462 | 8.69E-65 | 7 Rpl12  |
| 1.01E-68 | 0.656395363  | 0.946 | 0.666 | 1.33E-64 | 7 Rpsa   |
| 1.25E-68 | 0.573745864  | 0.973 | 0.797 | 1.65E-64 | 7 Rpl13a |
| 2.43E-68 | -1.511091338 | 0.223 | 0.641 | 3.21E-64 | 7 Ly6c2  |
| 2.58E-66 | -1.220241747 | 0.331 | 0.708 | 3.40E-62 | 7 Cyba   |
| 7.05E-65 | 0.628596403  | 0.956 | 0.748 | 9.30E-61 | 7 Rps3   |
| 3.57E-64 | 1.048151278  | 0.414 | 0.125 | 4.70E-60 | 7 Lmo2   |
| 5.78E-64 | 0.858068443  | 0.728 | 0.36  | 7.63E-60 | 7 Npm1   |
| 5.84E-64 | -1.736769476 | 0.088 | 0.529 | 7.70E-60 | 7 Cybb   |
| 1.09E-63 | 0.649918024  | 0.946 | 0.657 | 1.44E-59 | 7 Gm2000 |
| 1.92E-63 | 0.72698117   | 0.877 | 0.533 | 2.54E-59 | 7 Rps2   |
| 1.07E-62 | 0.939131546  | 0.382 | 0.104 | 1.41E-58 | 7 Mef2c  |
| 1.15E-62 | 0.622313858  | 0.953 | 0.706 | 1.52E-58 | 7 Rpl6   |
| 1.65E-62 | 0.754932128  | 0.88  | 0.555 | 2.17E-58 | 7 Rpl10a |



|          |              |       |       |          |             |
|----------|--------------|-------|-------|----------|-------------|
| 3.65E-61 | 0.557427015  | 0.975 | 0.8   | 4.82E-57 | 7 Rps23     |
| 8.58E-61 | 1.046512287  | 0.466 | 0.162 | 1.13E-56 | 7 Myb       |
| 6.26E-60 | 0.660091338  | 0.917 | 0.645 | 8.26E-56 | 7 Rps20     |
| 2.13E-59 | 0.919548951  | 0.542 | 0.211 | 2.81E-55 | 7 Mif       |
| 6.87E-59 | 0.593312399  | 0.953 | 0.705 | 9.06E-55 | 7 Rpl27a    |
| 6.92E-59 | 1.025773948  | 0.654 | 0.324 | 9.13E-55 | 7 H2afy     |
| 1.10E-58 | 0.70362823   | 0.877 | 0.581 | 1.45E-54 | 7 Rpl3      |
| 6.24E-58 | 0.59693881   | 0.922 | 0.703 | 8.23E-54 | 7 Rpl11     |
| 8.15E-58 | 0.521982627  | 0.968 | 0.841 | 1.08E-53 | 7 Rpl38     |
| 5.01E-57 | 0.581734945  | 0.941 | 0.732 | 6.61E-53 | 7 Rps15     |
| 1.22E-56 | 0.593115053  | 0.958 | 0.735 | 1.61E-52 | 7 Rps15a    |
| 2.70E-55 | 0.679494405  | 0.863 | 0.56  | 3.56E-51 | 7 Rpl15     |
| 3.50E-55 | 0.558903514  | 0.963 | 0.708 | 4.62E-51 | 7 Rps26     |
| 5.67E-55 | 0.562503544  | 0.953 | 0.707 | 7.48E-51 | 7 Rplp1     |
| 3.89E-54 | 0.65622527   | 0.895 | 0.643 | 5.13E-50 | 7 Eef1a1    |
| 6.05E-54 | 0.58695094   | 0.917 | 0.642 | 7.98E-50 | 7 Rps12     |
| 1.84E-53 | 0.762758903  | 0.725 | 0.382 | 2.43E-49 | 7 Rpl36-ps3 |
| 5.00E-53 | 0.910844116  | 0.453 | 0.166 | 6.60E-49 | 7 Erdr1     |
| 6.58E-53 | 0.52051545   | 0.961 | 0.809 | 8.68E-49 | 7 Rpl23a    |
| 7.91E-53 | 0.815411595  | 0.596 | 0.263 | 1.04E-48 | 7 Eef1g     |
| 2.99E-52 | 0.498786861  | 0.968 | 0.796 | 3.94E-48 | 7 Rps16     |
| 2.45E-50 | -1.10463494  | 0.348 | 0.665 | 3.23E-46 | 7 Prdx5     |
| 2.99E-50 | 0.739247512  | 0.745 | 0.413 | 3.94E-46 | 7 Gm9493    |
| 6.74E-50 | 0.392582665  | 1     | 0.953 | 8.90E-46 | 7 Rps27     |
| 1.08E-49 | -1.740757153 | 0.252 | 0.573 | 1.42E-45 | 7 Chil3     |
| 3.01E-49 | 0.705686717  | 0.73  | 0.398 | 3.97E-45 | 7 Hsp90ab1  |
| 1.79E-48 | 0.544870447  | 0.917 | 0.696 | 2.36E-44 | 7 Rpl28     |
| 5.35E-48 | 0.514181743  | 0.953 | 0.766 | 7.06E-44 | 7 Rplp2     |
| 9.61E-48 | -1.600342955 | 0.221 | 0.553 | 1.27E-43 | 7 S100a6    |
| 1.98E-47 | 0.999790635  | 0.375 | 0.126 | 2.61E-43 | 7 Pim1      |
| 4.21E-47 | 0.853978086  | 0.532 | 0.236 | 5.55E-43 | 7 Ncl       |

|          |              |       |       |          |              |
|----------|--------------|-------|-------|----------|--------------|
| 5.30E-47 | 0.583547975  | 0.875 | 0.628 | 6.99E-43 | 7 Rpl18      |
| 5.38E-47 | 0.654936087  | 0.772 | 0.45  | 7.10E-43 | 7 Rps18-ps3  |
| 8.12E-47 | 0.573052681  | 0.909 | 0.629 | 1.07E-42 | 7 Gm10263    |
| 1.65E-46 | 0.518049441  | 0.936 | 0.732 | 2.18E-42 | 7 Rpl24      |
| 2.38E-46 | 0.374717896  | 1     | 0.953 | 3.14E-42 | 7 Rpl41      |
| 2.54E-46 | 0.549030455  | 0.929 | 0.696 | 3.35E-42 | 7 Rplp0      |
| 2.88E-45 | 0.641720204  | 0.799 | 0.485 | 3.80E-41 | 7 Rpl2211    |
| 1.16E-44 | 0.518697068  | 0.924 | 0.707 | 1.53E-40 | 7 Rps17      |
| 4.36E-43 | -1.143029803 | 0.294 | 0.601 | 5.75E-39 | 7 S100a11    |
| 6.37E-43 | 0.338257318  | 0.995 | 0.975 | 8.41E-39 | 7 Rps29      |
| 2.15E-42 | 0.923150584  | 0.571 | 0.276 | 2.83E-38 | 7 Pdcd4      |
| 3.06E-42 | -1.696644552 | 0.145 | 0.468 | 4.03E-38 | 7 Pglyrp1    |
| 4.78E-42 | 0.411052492  | 0.971 | 0.866 | 6.31E-38 | 7 Rpl35a     |
| 1.37E-41 | 0.460917255  | 0.951 | 0.784 | 1.80E-37 | 7 Rps11      |
| 3.60E-41 | 0.59304254   | 0.841 | 0.574 | 4.75E-37 | 7 Rpl4       |
| 1.76E-40 | 0.459141929  | 0.953 | 0.795 | 2.32E-36 | 7 Rpl34      |
| 2.73E-40 | -2.029664668 | 0.998 | 0.994 | 3.61E-36 | 7 S100a9     |
| 3.80E-40 | 0.5518252    | 0.865 | 0.572 | 5.02E-36 | 7 Wdr89      |
| 8.91E-40 | 0.483584793  | 0.909 | 0.709 | 1.18E-35 | 7 Rpl19      |
| 9.78E-40 | -1.859665899 | 0.429 | 0.644 | 1.29E-35 | 7 Wfdc21     |
| 1.19E-39 | 0.602155258  | 0.757 | 0.437 | 1.57E-35 | 7 Rps12-ps3  |
| 1.44E-39 | -1.248735283 | 0.154 | 0.475 | 1.90E-35 | 7 Hp         |
| 1.44E-39 | 0.514114307  | 0.895 | 0.678 | 1.90E-35 | 7 Rps13      |
| 3.87E-39 | 0.679299934  | 0.282 | 0.083 | 5.10E-35 | 7 Ptprcap    |
| 6.17E-39 | 0.42210887   | 0.971 | 0.866 | 8.14E-35 | 7 Rps9       |
| 1.53E-38 | 0.678883042  | 0.605 | 0.317 | 2.02E-34 | 7 Hnrnpa1    |
| 2.40E-38 | 0.388013875  | 0.975 | 0.87  | 3.17E-34 | 7 Rps27a     |
| 4.86E-38 | -1.947599407 | 0.922 | 0.932 | 6.41E-34 | 7 Camp       |
| 9.91E-38 | -2.04484054  | 0.772 | 0.855 | 1.31E-33 | 7 Ngp        |
| 1.80E-37 | 0.508858288  | 0.895 | 0.656 | 2.38E-33 | 7 Rpl23a-ps3 |
| 2.23E-37 | 0.652240491  | 0.694 | 0.417 | 2.94E-33 | 7 Rpl13-ps3  |

|          |              |       |       |          |                 |
|----------|--------------|-------|-------|----------|-----------------|
| 2.98E-37 | -1.945111295 | 1     | 0.999 | 3.93E-33 | 7 S100a8        |
| 7.23E-37 | 0.405149875  | 0.975 | 0.835 | 9.54E-33 | 7 Rps27rt       |
| 1.12E-36 | 0.684611142  | 0.603 | 0.324 | 1.48E-32 | 7 Set           |
| 1.42E-36 | 0.792015978  | 0.314 | 0.111 | 1.87E-32 | 7 Pebp1         |
| 1.45E-36 | -0.636118356 | 0.623 | 0.791 | 1.91E-32 | 7 Shfm1         |
| 3.14E-36 | 0.484328492  | 0.88  | 0.632 | 4.14E-32 | 7 Rpl8          |
| 3.32E-36 | 0.613375839  | 0.716 | 0.43  | 4.39E-32 | 7 Rpl9-ps6      |
| 5.48E-36 | -1.808296332 | 0.333 | 0.573 | 7.23E-32 | 7 Lcn2          |
| 2.26E-35 | 0.47547953   | 0.882 | 0.666 | 2.98E-31 | 7 Rpl27         |
| 2.86E-35 | -0.794184521 | 0.998 | 0.999 | 3.78E-31 | 7 Actb          |
| 3.09E-35 | -1.321014577 | 0.164 | 0.457 | 4.07E-31 | 7 Lgals3        |
| 5.53E-35 | 0.576289747  | 0.713 | 0.421 | 7.30E-31 | 7 Gm10073       |
| 1.01E-34 | 0.61773752   | 0.441 | 0.185 | 1.34E-30 | 7 Srgn          |
| 1.06E-34 | 0.573152377  | 0.775 | 0.509 | 1.40E-30 | 7 Rpl22         |
| 1.12E-34 | 0.639774427  | 0.694 | 0.422 | 1.48E-30 | 7 Gnb2l1        |
| 6.31E-34 | 0.542773805  | 0.75  | 0.457 | 8.33E-30 | 7 Rps26-ps1     |
| 6.61E-34 | -0.547053409 | 0.684 | 0.846 | 8.72E-30 | 7 Pfn1          |
| 2.09E-33 | -0.782817024 | 0.466 | 0.678 | 2.76E-29 | 7 Arhgdib       |
| 3.30E-32 | 0.285415238  | 1     | 0.997 | 4.35E-28 | 7 Malat1        |
| 3.46E-32 | -1.245385598 | 0.167 | 0.447 | 4.57E-28 | 7 Anxa1         |
| 1.15E-31 | -1.052171682 | 0.23  | 0.495 | 1.52E-27 | 7 F630028O10Rik |
| 3.54E-31 | 0.640264812  | 0.578 | 0.32  | 4.67E-27 | 7 Nop10         |
| 5.30E-31 | 0.618819248  | 0.738 | 0.496 | 6.99E-27 | 7 Pabpc1        |
| 8.06E-31 | 0.379948515  | 0.926 | 0.742 | 1.06E-26 | 7 Gm10076       |
| 1.25E-30 | 0.667707856  | 0.272 | 0.094 | 1.65E-26 | 7 Tia1          |
| 1.41E-30 | 0.739954939  | 0.289 | 0.106 | 1.86E-26 | 7 Hmgn1         |
| 1.64E-30 | 0.575671346  | 0.708 | 0.453 | 2.17E-26 | 7 Gm8730        |
| 2.49E-30 | 0.573668855  | 0.748 | 0.492 | 3.28E-26 | 7 Cbx3          |
| 2.81E-30 | -1.448539437 | 0.105 | 0.377 | 3.70E-26 | 7 Ifitm6        |
| 5.83E-30 | 0.463750878  | 0.855 | 0.644 | 7.69E-26 | 7 Rps10         |
| 8.77E-29 | -0.626294662 | 0.735 | 0.826 | 1.16E-24 | 7 Ftl1          |

|          |              |       |       |          |              |
|----------|--------------|-------|-------|----------|--------------|
| 9.07E-29 | -1.576456726 | 0.35  | 0.554 | 1.20E-24 | 7 Ltf        |
| 1.51E-28 | 0.341899449  | 0.971 | 0.834 | 1.99E-24 | 7 Ptma       |
| 2.13E-28 | 0.60118041   | 0.549 | 0.302 | 2.81E-24 | 7 Eef1b2     |
| 3.06E-28 | 0.585520451  | 0.657 | 0.412 | 4.04E-24 | 7 Serbp1     |
| 3.97E-28 | 0.604191018  | 0.576 | 0.336 | 5.24E-24 | 7 Rpl6l      |
| 5.39E-28 | -0.932859465 | 0.436 | 0.645 | 7.12E-24 | 7 Cst3       |
| 1.21E-27 | -1.063802508 | 0.343 | 0.557 | 1.59E-23 | 7 Psap       |
| 2.76E-27 | 0.367361768  | 0.895 | 0.696 | 3.64E-23 | 7 Rpl31      |
| 2.07E-26 | 0.522441351  | 0.696 | 0.455 | 2.73E-22 | 7 Rpl29      |
| 2.59E-26 | -0.63893519  | 0.676 | 0.786 | 3.42E-22 | 7 Hmgb2      |
| 3.79E-26 | 0.593213345  | 0.439 | 0.215 | 4.99E-22 | 7 Hspe1      |
| 1.72E-25 | 0.795075743  | 0.275 | 0.11  | 2.27E-21 | 7 Vamp5      |
| 2.09E-25 | 0.50506263   | 0.745 | 0.534 | 2.76E-21 | 7 Rpl7       |
| 3.06E-25 | 0.381066331  | 0.907 | 0.716 | 4.04E-21 | 7 Rps25      |
| 4.55E-25 | 0.37797108   | 0.912 | 0.681 | 6.00E-21 | 7 Rpl10      |
| 5.10E-25 | -0.97564297  | 0.123 | 0.369 | 6.73E-21 | 7 Msrb1      |
| 1.09E-24 | 0.420038039  | 0.821 | 0.594 | 1.44E-20 | 7 Rps21      |
| 1.32E-24 | -0.825413283 | 0.221 | 0.467 | 1.75E-20 | 7 Alox5ap    |
| 2.68E-24 | -1.115442286 | 0.054 | 0.28  | 3.53E-20 | 7 Clec4a2    |
| 7.60E-24 | -0.578587943 | 0.527 | 0.704 | 1.00E-19 | 7 Sh3bgrl3   |
| 4.14E-23 | 0.595895646  | 0.377 | 0.183 | 5.46E-19 | 7 St13       |
| 4.37E-23 | -0.889125343 | 0.142 | 0.381 | 5.76E-19 | 7 Gsr        |
| 8.91E-23 | 0.479803638  | 0.65  | 0.412 | 1.18E-18 | 7 Eef2       |
| 9.20E-23 | 0.487173137  | 0.581 | 0.342 | 1.21E-18 | 7 Snrpf      |
| 9.61E-23 | -1.011851904 | 0.078 | 0.305 | 1.27E-18 | 7 Mgst1      |
| 1.33E-22 | 0.47520855   | 0.654 | 0.416 | 1.76E-18 | 7 Rpl5       |
| 1.59E-22 | 0.475384985  | 0.652 | 0.438 | 2.09E-18 | 7 Naca       |
| 1.83E-22 | 0.53004418   | 0.311 | 0.134 | 2.41E-18 | 7 Bcl11a     |
| 2.45E-22 | -1.170601299 | 0.113 | 0.331 | 3.23E-18 | 7 Ms4a6c     |
| 4.01E-22 | -1.232961732 | 0.074 | 0.288 | 5.29E-18 | 7 Ccr2       |
| 4.23E-22 | 0.619235519  | 0.279 | 0.119 | 5.58E-18 | 7 Rpl13a-ps1 |

|          |              |       |       |          |             |
|----------|--------------|-------|-------|----------|-------------|
| 4.93E-22 | 0.474221932  | 0.679 | 0.45  | 6.50E-18 | 7 Rpl30     |
| 6.73E-22 | 0.579374003  | 0.434 | 0.229 | 8.87E-18 | 7 Zfp36l2   |
| 1.24E-21 | -0.854512277 | 0.186 | 0.41  | 1.64E-17 | 7 Dstn      |
| 1.65E-21 | 0.507196015  | 0.654 | 0.437 | 2.18E-17 | 7 Atpif1    |
| 1.96E-21 | 0.600685055  | 0.593 | 0.401 | 2.58E-17 | 7 Stmn1     |
| 4.66E-21 | 0.315428592  | 0.895 | 0.691 | 6.14E-17 | 7 mt-Cytb   |
| 8.61E-21 | 0.426024798  | 0.689 | 0.46  | 1.14E-16 | 7 Rpl27-ps3 |
| 9.18E-21 | 0.539580639  | 0.471 | 0.271 | 1.21E-16 | 7 Gm10269   |
| 1.18E-20 | 0.6111111468 | 0.375 | 0.192 | 1.56E-16 | 7 Pan3      |
| 2.35E-20 | 0.617145852  | 0.279 | 0.124 | 3.10E-16 | 7 Zfos1     |
| 2.39E-20 | 0.534732598  | 0.507 | 0.309 | 3.16E-16 | 7 Gm10036   |
| 2.94E-20 | 0.506737721  | 0.525 | 0.312 | 3.88E-16 | 7 Hsp90aa1  |
| 5.97E-19 | -0.64688798  | 0.338 | 0.54  | 7.88E-15 | 7 Coro1a    |
| 8.96E-19 | 0.537904626  | 0.326 | 0.16  | 1.18E-14 | 7 Ddx21     |
| 9.48E-19 | 0.528458267  | 0.453 | 0.265 | 1.25E-14 | 7 Arglu1    |
| 1.68E-18 | 0.565946074  | 0.547 | 0.361 | 2.21E-14 | 7 Srrm2     |
| 3.23E-18 | -0.955943004 | 0.066 | 0.252 | 4.26E-14 | 7 Slfn2     |
| 3.95E-18 | -0.511689462 | 0.493 | 0.659 | 5.21E-14 | 7 Itm2b     |
| 4.99E-18 | 0.388314648  | 0.721 | 0.506 | 6.59E-14 | 7 Snrpg     |
| 6.01E-18 | -1.28338081  | 0.184 | 0.371 | 7.93E-14 | 7 Ifi27l2a  |
| 6.23E-18 | -0.894123929 | 0.086 | 0.275 | 8.22E-14 | 7 Ncf1      |
| 7.49E-18 | -0.914717077 | 0.113 | 0.306 | 9.88E-14 | 7 Sat1      |
| 1.19E-17 | 0.542871327  | 0.277 | 0.129 | 1.57E-13 | 7 Paip2     |
| 1.61E-17 | 0.380037264  | 0.694 | 0.486 | 2.12E-13 | 7 Rpl7a     |
| 1.91E-17 | 0.519734882  | 0.341 | 0.177 | 2.52E-13 | 7 Pnlsr     |
| 6.80E-17 | -0.648761637 | 0.284 | 0.476 | 8.97E-13 | 7 Rac2      |
| 8.14E-17 | -0.852523011 | 0.142 | 0.328 | 1.07E-12 | 7 Lsp1      |
| 1.06E-16 | 0.435210242  | 0.478 | 0.292 | 1.39E-12 | 7 mt-Nd2    |
| 1.91E-16 | 0.377223266  | 0.772 | 0.6   | 2.52E-12 | 7 Gm11808   |
| 3.44E-16 | 0.532248104  | 0.301 | 0.154 | 4.53E-12 | 7 Fubp1     |
| 3.56E-16 | -0.789816412 | 0.098 | 0.278 | 4.70E-12 | 7 Cotl1     |

|          |              |       |       |          |            |
|----------|--------------|-------|-------|----------|------------|
| 3.72E-16 | 0.551530866  | 0.292 | 0.147 | 4.90E-12 | 7 Hnrnpa0  |
| 6.03E-16 | 0.537498365  | 0.306 | 0.161 | 7.95E-12 | 7 Cbx1     |
| 6.33E-16 | 0.47798034   | 0.453 | 0.273 | 8.35E-12 | 7 Cmtm7    |
| 6.59E-16 | -0.71277909  | 0.154 | 0.344 | 8.69E-12 | 7 Clec12a  |
| 6.92E-16 | 0.549499859  | 0.275 | 0.136 | 9.13E-12 | 7 Mat2a    |
| 7.31E-16 | -0.861679186 | 0.093 | 0.268 | 9.64E-12 | 7 Cebpb    |
| 7.81E-16 | 0.452454302  | 0.473 | 0.29  | 1.03E-11 | 7 Erh      |
| 1.23E-15 | -0.378801096 | 0.679 | 0.786 | 1.63E-11 | 7 Serf2    |
| 1.45E-15 | -0.882361555 | 0.088 | 0.261 | 1.91E-11 | 7 Tmcc1    |
| 2.29E-15 | 0.450056656  | 0.297 | 0.15  | 3.02E-11 | 7 Tardbp   |
| 2.57E-15 | 0.340841973  | 0.787 | 0.621 | 3.40E-11 | 7 Uba52    |
| 2.68E-15 | 0.511753736  | 0.36  | 0.201 | 3.54E-11 | 7 Cox7a2l  |
| 9.26E-15 | 0.493759145  | 0.279 | 0.142 | 1.22E-10 | 7 Cnbp     |
| 9.83E-15 | 0.490372414  | 0.304 | 0.16  | 1.30E-10 | 7 Tomm20   |
| 1.16E-14 | -0.445457969 | 0.578 | 0.694 | 1.53E-10 | 7 Actg1    |
| 1.42E-14 | -0.766766135 | 0.098 | 0.267 | 1.88E-10 | 7 Anxa2    |
| 1.68E-14 | 0.541288634  | 0.292 | 0.156 | 2.22E-10 | 7 G3bp1    |
| 2.15E-14 | 0.44033756   | 0.299 | 0.154 | 2.84E-10 | 7 Sepw1    |
| 5.13E-14 | -0.827520368 | 0.125 | 0.289 | 6.76E-10 | 7 Slpi     |
| 7.02E-14 | 0.452394164  | 0.333 | 0.183 | 9.26E-10 | 7 Ogt      |
| 1.21E-13 | -0.630500017 | 0.243 | 0.409 | 1.59E-09 | 7 Actr3    |
| 1.43E-13 | 0.517315133  | 0.311 | 0.174 | 1.88E-09 | 7 Gm6133   |
| 2.16E-13 | -0.662941503 | 0.172 | 0.339 | 2.85E-09 | 7 Cd53     |
| 3.09E-13 | -0.713065437 | 0.208 | 0.375 | 4.08E-09 | 7 Lst1     |
| 3.48E-13 | -0.404667085 | 0.615 | 0.715 | 4.59E-09 | 7 Myl6     |
| 6.92E-13 | 0.466438587  | 0.304 | 0.169 | 9.13E-09 | 7 Lsm3     |
| 7.72E-13 | 0.383913745  | 0.574 | 0.418 | 1.02E-08 | 7 Sumo2    |
| 3.27E-12 | 0.496283674  | 0.265 | 0.142 | 4.31E-08 | 7 Chd4     |
| 3.29E-12 | -0.688782923 | 0.137 | 0.287 | 4.33E-08 | 7 Reep5    |
| 3.41E-12 | 0.437257065  | 0.267 | 0.141 | 4.50E-08 | 7 Atxn7l3b |
| 4.25E-12 | 0.419127274  | 0.502 | 0.356 | 5.61E-08 | 7 Ran      |

|          |              |       |       |          |             |
|----------|--------------|-------|-------|----------|-------------|
| 4.59E-12 | 0.440113564  | 0.262 | 0.139 | 6.05E-08 | 7 Prdx2     |
| 4.63E-12 | 0.409318731  | 0.468 | 0.315 | 6.11E-08 | 7 Ranbp1    |
| 4.67E-12 | -0.498616868 | 0.35  | 0.499 | 6.16E-08 | 7 Gnai2     |
| 1.30E-11 | 0.456668372  | 0.441 | 0.296 | 1.72E-07 | 7 Tsix      |
| 1.35E-11 | 0.313345013  | 0.635 | 0.455 | 1.78E-07 | 7 Rpl10-ps3 |
| 1.42E-11 | 0.411583178  | 0.368 | 0.227 | 1.88E-07 | 7 Metap2    |
| 1.44E-11 | 0.36055985   | 0.517 | 0.363 | 1.90E-07 | 7 Srsf2     |
| 1.50E-11 | -0.675350542 | 0.123 | 0.265 | 1.97E-07 | 7 Flna      |
| 2.34E-11 | 0.407988079  | 0.593 | 0.464 | 3.09E-07 | 7 Ndufa4    |
| 2.89E-11 | 0.503136009  | 0.304 | 0.179 | 3.81E-07 | 7 Hp1bp3    |
| 3.70E-11 | -0.642305092 | 0.123 | 0.265 | 4.88E-07 | 7 Vim       |
| 4.21E-11 | -0.625676978 | 0.529 | 0.591 | 5.56E-07 | 7 Hmgn2     |
| 5.14E-11 | -0.348629783 | 0.669 | 0.75  | 6.77E-07 | 7 Gpx1      |
| 5.47E-11 | 0.364801587  | 0.444 | 0.295 | 7.22E-07 | 7 Hnrnrm    |
| 5.49E-11 | -0.344935292 | 0.625 | 0.721 | 7.24E-07 | 7 Cfl1      |
| 5.53E-11 | -0.878835731 | 0.48  | 0.564 | 7.30E-07 | 7 Ifitm3    |
| 5.79E-11 | 0.37285354   | 0.321 | 0.191 | 7.64E-07 | 7 Gm10020   |
| 5.86E-11 | 0.321166213  | 0.5   | 0.338 | 7.72E-07 | 7 Ptpn18    |
| 8.33E-11 | -0.555913122 | 0.186 | 0.333 | 1.10E-06 | 7 Scp2      |
| 9.67E-11 | 0.346520859  | 0.297 | 0.169 | 1.28E-06 | 7 Eif3e     |
| 9.86E-11 | 0.421016857  | 0.27  | 0.154 | 1.30E-06 | 7 Banf1     |
| 1.11E-10 | -0.521674526 | 0.221 | 0.364 | 1.47E-06 | 7 Fam49b    |
| 1.14E-10 | 0.342625894  | 0.637 | 0.488 | 1.50E-06 | 7 Tubb5     |
| 1.16E-10 | 0.413895634  | 0.382 | 0.245 | 1.53E-06 | 7 Eif3a     |
| 1.18E-10 | 0.38881706   | 0.363 | 0.23  | 1.56E-06 | 7 Ptges3    |
| 2.23E-10 | 0.400511577  | 0.257 | 0.145 | 2.94E-06 | 7 Hnrnpr    |
| 2.47E-10 | 0.441877391  | 0.297 | 0.18  | 3.26E-06 | 7 Srsf6     |
| 2.92E-10 | 0.341369291  | 0.517 | 0.367 | 3.85E-06 | 7 Btf3      |
| 3.03E-10 | 0.315003984  | 0.544 | 0.382 | 4.00E-06 | 7 Gm8186    |
| 5.98E-10 | 0.316962317  | 0.468 | 0.316 | 7.89E-06 | 7 Eif3f     |
| 8.76E-10 | 0.335686729  | 0.377 | 0.24  | 1.16E-05 | 7 Rbm25     |

|          |              |       |       |             |                 |
|----------|--------------|-------|-------|-------------|-----------------|
| 8.81E-10 | -0.615390443 | 0.13  | 0.259 | 1.16E-05    | 7 Ostf1         |
| 1.05E-09 | -0.424004242 | 0.422 | 0.544 | 1.38E-05    | 7 Mrpl33        |
| 1.08E-09 | 0.352854521  | 0.277 | 0.16  | 1.42E-05    | 7 Mtdh          |
| 1.74E-09 | 0.399998984  | 0.314 | 0.196 | 2.29E-05    | 7 Srsf7         |
| 2.16E-09 | 0.252078039  | 0.5   | 0.348 | 2.86E-05    | 7 H2-K1         |
| 2.93E-09 | 0.343906511  | 0.417 | 0.285 | 3.87E-05    | 7 Nap1l1        |
| 3.49E-09 | -0.967871933 | 0.645 | 0.636 | 4.60E-05    | 7 Crip1         |
| 3.61E-09 | 0.332906125  | 0.358 | 0.231 | 4.76E-05    | 7 Zfp207        |
| 4.29E-09 | -0.361414992 | 0.451 | 0.562 | 5.66E-05    | 7 Calm1         |
| 4.80E-09 | -0.520969512 | 0.26  | 0.379 | 6.34E-05    | 7 Arpc5         |
| 4.86E-09 | -0.524560473 | 0.176 | 0.305 | 6.41E-05    | 7 Cdk2ap2       |
| 6.11E-09 | -0.564855697 | 0.211 | 0.342 | 8.06E-05    | 7 2810417H13Rik |
| 7.12E-09 | 0.412662506  | 0.346 | 0.23  | 9.39E-05    | 7 Park7         |
| 7.74E-09 | 0.366917891  | 0.319 | 0.203 | 0.000102068 | 7 Fus           |
| 1.00E-08 | -0.523511508 | 0.145 | 0.266 | 0.000132388 | 7 Aprt          |
| 1.10E-08 | 0.300219382  | 0.561 | 0.425 | 0.000145077 | 7 Ybx1          |
| 1.27E-08 | 0.366629855  | 0.267 | 0.163 | 0.000167413 | 7 Prpf4b        |
| 1.50E-08 | -0.475231991 | 0.184 | 0.313 | 0.000198196 | 7 Taldo1        |
| 1.53E-08 | -0.434064112 | 0.331 | 0.452 | 0.000201719 | 7 Arpc1b        |
| 1.73E-08 | 0.351191751  | 0.333 | 0.215 | 0.000228678 | 7 Gltscr2       |
| 1.74E-08 | -1.34274627  | 0.145 | 0.254 | 0.000229315 | 7 Elane         |
| 1.93E-08 | 0.303764305  | 0.441 | 0.306 | 0.000254735 | 7 Atp5g1        |
| 2.23E-08 | 0.387255168  | 0.412 | 0.291 | 0.000294255 | 7 Atp5g2        |
| 2.28E-08 | 0.343179827  | 0.267 | 0.162 | 0.000300304 | 7 Ddx17         |
| 2.70E-08 | 0.421199721  | 0.292 | 0.188 | 0.000355742 | 7 Ywhaq         |
| 3.28E-08 | 0.318470314  | 0.39  | 0.265 | 0.000432869 | 7 Ywhae         |
| 3.31E-08 | -0.612632444 | 0.404 | 0.482 | 0.000436836 | 7 Lgals1        |
| 6.96E-08 | 0.325281169  | 0.348 | 0.233 | 0.000918428 | 7 Eif5b         |
| 7.98E-08 | 0.272376855  | 0.529 | 0.4   | 0.001052096 | 7 Rbm39         |
| 8.29E-08 | -0.40276802  | 0.336 | 0.449 | 0.001093853 | 7 Actr2         |
| 8.49E-08 | 0.286060404  | 0.458 | 0.33  | 0.001120202 | 7 Srsf3         |



|          |              |       |       |             |                 |
|----------|--------------|-------|-------|-------------|-----------------|
| 8.62E-08 | 0.380114148  | 0.267 | 0.168 | 0.001137674 | 7 Prpf38b       |
| 1.28E-07 | -0.461909877 | 0.321 | 0.424 | 0.001683469 | 7 Cdc42         |
| 1.34E-07 | 0.344192413  | 0.26  | 0.162 | 0.001761766 | 7 Srsf1         |
| 1.51E-07 | -0.437670367 | 0.174 | 0.291 | 0.001996911 | 7 Cd44          |
| 1.64E-07 | -0.511265828 | 0.172 | 0.281 | 0.002157425 | 7 Aldh2         |
| 2.20E-07 | 0.28707603   | 0.304 | 0.197 | 0.002900883 | 7 Zfp706        |
| 2.41E-07 | 0.284957315  | 0.284 | 0.177 | 0.003181902 | 7 Mrpl52        |
| 2.50E-07 | 0.332769248  | 0.382 | 0.27  | 0.003300442 | 7 Bola2         |
| 2.81E-07 | -0.407469326 | 0.333 | 0.438 | 0.003711453 | 7 Tspo          |
| 3.03E-07 | -0.472738473 | 0.211 | 0.323 | 0.0040019   | 7 Ptprc         |
| 3.07E-07 | -0.486159496 | 0.262 | 0.376 | 0.00405079  | 7 Myh9          |
| 3.21E-07 | -0.447715693 | 0.284 | 0.391 | 0.004238582 | 7 1810037117Rik |
| 3.35E-07 | 0.295717948  | 0.297 | 0.192 | 0.00442466  | 7 Al662270      |
| 4.08E-07 | -0.354504269 | 0.375 | 0.481 | 0.005376322 | 7 H2afj         |
| 4.27E-07 | 0.275725369  | 0.52  | 0.388 | 0.005628916 | 7 mt-Atp8       |
| 4.35E-07 | -0.471782603 | 0.267 | 0.37  | 0.005744018 | 7 Serp1         |
| 4.39E-07 | -0.333445197 | 0.468 | 0.538 | 0.005796402 | 7 Atp5k         |
| 4.67E-07 | -0.355809889 | 0.397 | 0.496 | 0.006163251 | 7 Arpc2         |
| 4.68E-07 | 0.347778039  | 0.26  | 0.167 | 0.006171516 | 7 Matr3         |
| 5.48E-07 | -0.526828926 | 0.164 | 0.264 | 0.007228262 | 7 Gm10282       |
| 6.95E-07 | 0.298205252  | 0.382 | 0.274 | 0.00916342  | 7 Hnrnpab       |
| 7.26E-07 | 0.377193005  | 0.275 | 0.182 | 0.009582178 | 7 Ramp1         |
| 9.30E-07 | -0.433091312 | 0.395 | 0.474 | 0.012263077 | 7 Ly6e          |
| 9.70E-07 | -0.381974254 | 0.223 | 0.333 | 0.012794519 | 7 Lamtor4       |
| 1.03E-06 | -0.435786325 | 0.152 | 0.253 | 0.013590095 | 7 S100a13       |
| 1.17E-06 | 0.294534655  | 0.319 | 0.215 | 0.015379492 | 7 Etfb          |
| 1.28E-06 | 0.292334848  | 0.26  | 0.169 | 0.01688959  | 7 Uqcc2         |
| 1.32E-06 | 0.302898805  | 0.38  | 0.276 | 0.01738003  | 7 Tra2b         |
| 1.97E-06 | 0.26105199   | 0.27  | 0.176 | 0.025974199 | 7 Trmt112       |
| 2.61E-06 | 0.312657585  | 0.397 | 0.294 | 0.034453188 | 7 Sfpq          |
| 3.19E-06 | 0.295460269  | 0.299 | 0.206 | 0.042032506 | 7 Hnrnpc        |

|          |              |       |       |             |           |
|----------|--------------|-------|-------|-------------|-----------|
| 3.22E-06 | -0.316485136 | 0.164 | 0.264 | 0.042525642 | 7 Lmo4    |
| 3.45E-06 | 0.32222546   | 0.316 | 0.224 | 0.045470787 | 7 Sptssa  |
| 3.47E-06 | -0.405575829 | 0.341 | 0.429 | 0.045806306 | 7 Tkt     |
| 3.59E-06 | 0.253508206  | 0.309 | 0.209 | 0.047337362 | 7 Pdap1   |
| 5.10E-06 | -0.37625326  | 0.275 | 0.374 | 0.067241837 | 7 Capza2  |
| 6.52E-06 | 0.331397599  | 0.252 | 0.171 | 0.085964315 | 7 Mrpl23  |
| 6.70E-06 | 0.36123948   | 0.265 | 0.182 | 0.088356818 | 7 Skp1a   |
| 7.46E-06 | -0.446160703 | 0.172 | 0.264 | 0.098411995 | 7 Ucp2    |
| 7.54E-06 | 0.262766354  | 0.326 | 0.23  | 0.099522758 | 7 Dpm3    |
| 8.02E-06 | 0.343957649  | 0.301 | 0.215 | 0.105754772 | 7 Top1    |
| 9.87E-06 | -0.473263887 | 0.208 | 0.302 | 0.13022316  | 7 Cd24a   |
| 1.44E-05 | -0.292618019 | 0.596 | 0.64  | 0.190165349 | 7 Sec61g  |
| 1.57E-05 | -0.32135583  | 0.289 | 0.385 | 0.206683642 | 7 Lbr     |
| 1.63E-05 | 0.273531045  | 0.35  | 0.257 | 0.214888629 | 7 Prrc2c  |
| 1.65E-05 | 0.260397072  | 0.353 | 0.256 | 0.217793433 | 7 Snrpd2  |
| 1.85E-05 | 0.337555046  | 0.252 | 0.175 | 0.244204659 | 7 Dnmt1   |
| 2.09E-05 | -0.329847938 | 0.228 | 0.324 | 0.275298037 | 7 Capza1  |
| 2.53E-05 | 0.30775831   | 0.275 | 0.193 | 0.333508922 | 7 Caprin1 |
| 2.63E-05 | 0.325248876  | 0.267 | 0.187 | 0.346686867 | 7 Hnrnpl  |
| 2.64E-05 | -0.437014604 | 0.24  | 0.324 | 0.348406411 | 7 Gm10116 |
| 2.71E-05 | -0.307821941 | 0.517 | 0.581 | 0.357728603 | 7 H2-D1   |
| 3.29E-05 | -0.356749051 | 0.243 | 0.333 | 0.433874507 | 7 Ap3s1   |
| 3.49E-05 | -0.291134665 | 0.279 | 0.375 | 0.460978451 | 7 Myeov2  |
| 3.91E-05 | -0.539817719 | 0.186 | 0.262 | 0.516130267 | 7 Gm9844  |
| 4.04E-05 | -0.349588544 | 0.338 | 0.416 | 0.533496399 | 7 Atox1   |
| 4.24E-05 | -0.26707703  | 0.502 | 0.562 | 0.558825453 | 7 Ndufa3  |
| 4.49E-05 | -0.344460773 | 0.189 | 0.276 | 0.591693152 | 7 Aldoa   |
| 5.11E-05 | -0.308421902 | 0.275 | 0.37  | 0.674505787 | 7 Arpc3   |
| 5.60E-05 | -0.309713507 | 0.309 | 0.396 | 0.738927511 | 7 Smdt1   |
| 6.16E-05 | -0.396014272 | 0.174 | 0.26  | 0.81306143  | 7 Btg1    |
| 9.49E-05 | 0.256425175  | 0.257 | 0.184 | 1           | 7 Eif3j1  |

|            |              |       |       |           |            |
|------------|--------------|-------|-------|-----------|------------|
| 0.00010428 | -0.364015523 | 0.225 | 0.307 | 1         | 7 Myl12a   |
| 0.00011064 | 0.295031799  | 0.252 | 0.178 | 1         | 7 Rsrc2    |
| 0.00011401 | 0.283646046  | 0.321 | 0.242 | 1         | 7 Hnrnph1  |
| 0.00011556 | -0.297014875 | 0.27  | 0.359 | 1         | 7 Atp6v0e  |
| 0.00011936 | -0.339096357 | 0.174 | 0.254 | 1         | 7 Sec11c   |
| 0.00012629 | -0.370411217 | 0.297 | 0.37  | 1         | 7 Emp3     |
| 0.00013532 | -0.307769349 | 0.331 | 0.409 | 1         | 7 Ndufa13  |
| 0.00015928 | -0.310696724 | 0.189 | 0.273 | 1         | 7 Fis1     |
| 0.00016597 | 0.288330536  | 0.284 | 0.211 | 1         | 7 Atrx     |
| 0.00020856 | -0.319518409 | 0.211 | 0.292 | 1         | 7 Gnb2     |
| 0.00023573 | -0.282434659 | 0.252 | 0.337 | 1         | 7 Lsm5     |
| 0.00032199 | -0.312327049 | 0.282 | 0.354 | 1         | 7 Ndufa1   |
| 0.00072876 | -0.357272149 | 0.26  | 0.326 | 1         | 7 Npc2     |
| 0.0008521  | -0.345684454 | 0.221 | 0.283 | 1         | 7 Lcp1     |
| 0.00087328 | -0.316765843 | 0.216 | 0.282 | 1         | 7 Iqgap1   |
| 0.00088374 | -0.326774333 | 0.233 | 0.296 | 1         | 7 Pkm      |
| 0.00113649 | -0.258768663 | 0.292 | 0.367 | 1         | 7 BC005537 |
| 0.00160427 | 0.349552286  | 0.414 | 0.352 | 1         | 7 Gm42418  |
| 0.00216771 | -0.25680019  | 0.206 | 0.273 | 1         | 7 Gpi1     |
| 0.0023148  | -0.270152984 | 0.257 | 0.318 | 1         | 7 Mrps21   |
| 0.00332204 | -0.273156906 | 0.25  | 0.307 | 1         | 7 Uqcrb    |
| 0.00406716 | -0.831515638 | 0.431 | 0.479 | 1         | 7 Retnlg   |
| 0.00905264 | -0.258819911 | 0.245 | 0.296 | 1         | 7 Ppp1cb   |
| 8.24E-305  | 2.252947419  | 0.967 | 0.23  | 1.09E-300 | 8 Prtn3    |
| 8.04E-298  | 2.675979809  | 0.919 | 0.206 | 1.06E-293 | 8 Elane    |
| 1.51E-289  | 2.309410553  | 0.943 | 0.229 | 2.00E-285 | 8 Mpo      |
| 1.77E-222  | 1.799248537  | 0.71  | 0.128 | 2.34E-218 | 8 Ms4a3    |
| 3.69E-217  | 1.817151168  | 0.694 | 0.122 | 4.86E-213 | 8 Ctsg     |
| 4.21E-162  | 1.473177713  | 0.547 | 0.092 | 5.55E-158 | 8 Mt1      |
| 8.65E-139  | 1.312118936  | 0.591 | 0.127 | 1.14E-134 | 8 Nkg7     |
| 1.30E-128  | 1.431644249  | 0.466 | 0.082 | 1.71E-124 | 8 Hyou1    |

Mac

|           |              |       |       |           |           |
|-----------|--------------|-------|-------|-----------|-----------|
| 5.53E-128 | 1.291485584  | 0.509 | 0.099 | 7.29E-124 | 8 Gstm1   |
| 6.93E-126 | 0.625142341  | 1     | 0.974 | 9.14E-122 | 8 Rps29   |
| 2.70E-120 | 1.324779048  | 0.64  | 0.175 | 3.57E-116 | 8 Srgn    |
| 5.21E-99  | 0.609330168  | 0.997 | 0.953 | 6.87E-95  | 8 Rpl41   |
| 6.96E-99  | 0.704811454  | 0.997 | 0.85  | 9.17E-95  | 8 Rpl35   |
| 1.04E-94  | -1.787621995 | 0.772 | 0.914 | 1.37E-90  | 8 Lyz2    |
| 8.34E-87  | 0.60401423   | 1     | 0.895 | 1.10E-82  | 8 Rps28   |
| 1.19E-83  | 0.802730138  | 0.954 | 0.625 | 1.57E-79  | 8 Rpl36a  |
| 3.06E-82  | 1.101617468  | 0.39  | 0.085 | 4.04E-78  | 8 Rgcc    |
| 8.09E-82  | 1.11046957   | 0.501 | 0.138 | 1.07E-77  | 8 Sdf2l1  |
| 1.82E-80  | 1.088363326  | 0.623 | 0.221 | 2.40E-76  | 8 Calr    |
| 7.91E-79  | 0.619735643  | 0.997 | 0.833 | 1.04E-74  | 8 Ptma    |
| 1.64E-78  | 0.542491253  | 0.997 | 0.935 | 2.16E-74  | 8 Rpl37a  |
| 8.39E-77  | 0.893663183  | 0.282 | 0.047 | 1.11E-72  | 8 B4galt6 |
| 6.10E-76  | 0.564002812  | 0.997 | 0.89  | 8.05E-72  | 8 Rps19   |
| 2.21E-71  | 0.617431749  | 0.986 | 0.827 | 2.92E-67  | 8 Rps8    |
| 8.76E-69  | 1.122784532  | 0.656 | 0.272 | 1.16E-64  | 8 Pdcd4   |
| 4.87E-67  | 0.646071162  | 0.967 | 0.74  | 6.42E-63  | 8 Gm10076 |
| 2.63E-66  | 0.560548702  | 0.992 | 0.86  | 3.47E-62  | 8 Rpl32   |
| 6.43E-66  | -1.301749668 | 0.412 | 0.749 | 8.48E-62  | 8 Cd52    |
| 4.90E-63  | 0.581742465  | 0.984 | 0.8   | 6.46E-59  | 8 Rps23   |
| 5.03E-62  | 0.603092493  | 0.976 | 0.764 | 6.63E-58  | 8 Rpl39   |
| 4.56E-61  | 0.623062687  | 0.954 | 0.668 | 6.01E-57  | 8 Plac8   |
| 1.14E-60  | 0.950695534  | 0.377 | 0.101 | 1.51E-56  | 8 Gatm    |
| 2.70E-59  | 0.638398531  | 0.949 | 0.641 | 3.56E-55  | 8 Rps12   |
| 3.77E-58  | 0.783855135  | 0.827 | 0.486 | 4.97E-54  | 8 Rpl22l1 |
| 2.58E-57  | 0.893568764  | 0.48  | 0.163 | 3.40E-53  | 8 Myb     |
| 1.20E-56  | 0.517321043  | 0.978 | 0.827 | 1.58E-52  | 8 Rps18   |
| 1.37E-56  | 0.939273473  | 0.656 | 0.307 | 1.81E-52  | 8 Ap3s1   |
| 2.40E-56  | 0.605631498  | 0.949 | 0.658 | 3.17E-52  | 8 Gm2000  |
| 3.30E-56  | -1.139648542 | 0.404 | 0.733 | 4.36E-52  | 8 Fcer1g  |

|          |              |       |       |          |             |
|----------|--------------|-------|-------|----------|-------------|
| 7.37E-55 | 0.494534188  | 0.984 | 0.87  | 9.72E-51 | 8 Rps27a    |
| 4.27E-54 | 0.483833616  | 0.997 | 0.952 | 5.64E-50 | 8 mt-Co3    |
| 2.25E-53 | 0.571311885  | 0.962 | 0.734 | 2.97E-49 | 8 Rps6      |
| 2.58E-53 | 0.608568115  | 0.943 | 0.708 | 3.40E-49 | 8 Rps17     |
| 1.30E-52 | 0.478187622  | 0.986 | 0.897 | 1.71E-48 | 8 Rpl37     |
| 5.03E-52 | 0.56111393   | 0.94  | 0.715 | 6.63E-48 | 8 Rps25     |
| 2.66E-51 | 0.547093097  | 0.97  | 0.852 | 3.51E-47 | 8 mt-Atp6   |
| 8.07E-51 | 0.815739218  | 0.428 | 0.141 | 1.06E-46 | 8 Cdk6      |
| 4.04E-50 | 0.56658327   | 0.935 | 0.671 | 5.33E-46 | 8 Rpl14     |
| 1.68E-49 | -0.474350604 | 1     | 0.996 | 2.22E-45 | 8 Tmsb4x    |
| 3.25E-49 | 0.801139121  | 0.26  | 0.06  | 4.29E-45 | 8 Alas1     |
| 6.69E-48 | 0.488069547  | 0.97  | 0.842 | 8.83E-44 | 8 Rpl38     |
| 2.43E-47 | 0.60171624   | 0.921 | 0.63  | 3.21E-43 | 8 Gm10263   |
| 5.10E-47 | 0.471346018  | 0.981 | 0.809 | 6.73E-43 | 8 Rpl23a    |
| 5.87E-47 | 0.445445883  | 0.986 | 0.865 | 7.75E-43 | 8 Rpl35a    |
| 1.61E-46 | -1.707366751 | 0.23  | 0.579 | 2.12E-42 | 8 Ifitm3    |
| 3.13E-46 | 0.526024575  | 0.97  | 0.706 | 4.13E-42 | 8 Rpl6      |
| 5.16E-46 | 0.57375117   | 0.921 | 0.691 | 6.81E-42 | 8 mt-Cytb   |
| 6.95E-46 | 0.502959928  | 0.965 | 0.767 | 9.17E-42 | 8 Rplp2     |
| 2.65E-45 | 0.664229989  | 0.783 | 0.437 | 3.50E-41 | 8 Rps12-ps3 |
| 7.01E-45 | 0.501659001  | 0.954 | 0.754 | 9.25E-41 | 8 Rpl36     |
| 1.43E-44 | 0.870091156  | 0.293 | 0.081 | 1.89E-40 | 8 Igfbp4    |
| 2.14E-44 | 0.796374985  | 0.569 | 0.26  | 2.82E-40 | 8 Bola2     |
| 6.53E-44 | -1.677477853 | 0.228 | 0.551 | 8.62E-40 | 8 S100a6    |
| 7.65E-43 | -1.417127492 | 0.556 | 0.751 | 1.01E-38 | 8 Tmsb10    |
| 1.12E-42 | 0.771380995  | 0.52  | 0.215 | 1.48E-38 | 8 Mif       |
| 1.76E-42 | 0.594784594  | 0.808 | 0.489 | 2.32E-38 | 8 Sec61b    |
| 2.29E-42 | 0.845917836  | 0.488 | 0.206 | 3.03E-38 | 8 Etfb      |
| 7.04E-42 | 0.48227193   | 0.946 | 0.729 | 9.28E-38 | 8 Rpl23     |
| 7.54E-42 | 0.863535131  | 0.263 | 0.069 | 9.94E-38 | 8 Pam       |
| 9.90E-42 | 0.706503392  | 0.664 | 0.338 | 1.31E-37 | 8 Snrpf     |

|          |              |       |       |          |              |
|----------|--------------|-------|-------|----------|--------------|
| 2.29E-41 | -1.317848883 | 0.179 | 0.521 | 3.02E-37 | 8 Cybb       |
| 2.69E-41 | 0.482236717  | 0.951 | 0.71  | 3.55E-37 | 8 Rps26      |
| 5.92E-41 | 0.834834455  | 0.401 | 0.146 | 7.80E-37 | 8 Kdelr2     |
| 7.95E-41 | 0.584036336  | 0.883 | 0.604 | 1.05E-36 | 8 mt-Nd1     |
| 1.27E-40 | 0.475075747  | 0.949 | 0.709 | 1.68E-36 | 8 Rplp1      |
| 6.87E-40 | 0.60347462   | 0.802 | 0.465 | 9.07E-36 | 8 Rpl12      |
| 2.22E-39 | 0.475972686  | 0.938 | 0.738 | 2.93E-35 | 8 Rps15a     |
| 3.96E-39 | -0.827764986 | 0.683 | 0.823 | 5.23E-35 | 8 Tyrobp     |
| 5.70E-39 | 0.521976559  | 0.854 | 0.536 | 7.52E-35 | 8 Rps2       |
| 5.77E-38 | 0.490025422  | 0.916 | 0.678 | 7.61E-34 | 8 Rps7       |
| 9.21E-38 | 0.555590022  | 0.843 | 0.594 | 1.22E-33 | 8 Rps21      |
| 1.17E-37 | -1.793381299 | 0.049 | 0.379 | 1.54E-33 | 8 Ifitm6     |
| 2.90E-36 | 0.68404988   | 0.629 | 0.317 | 3.83E-32 | 8 Hnrnpa1    |
| 6.15E-36 | 0.72456908   | 0.29  | 0.09  | 8.12E-32 | 8 Pdia4      |
| 8.67E-36 | 0.699471369  | 0.314 | 0.103 | 1.14E-31 | 8 Svip       |
| 2.33E-35 | 0.755942666  | 0.379 | 0.145 | 3.07E-31 | 8 Rpn1       |
| 2.83E-35 | 0.471966398  | 0.919 | 0.656 | 3.73E-31 | 8 Rpl23a-ps3 |
| 4.03E-35 | 0.439998951  | 0.959 | 0.77  | 5.31E-31 | 8 Rpl26      |
| 4.60E-35 | 0.536077953  | 0.818 | 0.508 | 6.07E-31 | 8 Rpl22      |
| 5.00E-35 | 0.710223867  | 0.623 | 0.324 | 6.59E-31 | 8 Set        |
| 8.36E-35 | 0.57521303   | 0.753 | 0.453 | 1.10E-30 | 8 Rps18-ps3  |
| 1.01E-34 | 0.65678936   | 0.61  | 0.297 | 1.33E-30 | 8 Atp5g1     |
| 1.29E-34 | -1.963428382 | 0.339 | 0.571 | 1.70E-30 | 8 Lcn2       |
| 2.94E-34 | 0.52437174   | 0.864 | 0.574 | 3.87E-30 | 8 Wdr89      |
| 2.96E-34 | -1.491042555 | 0.455 | 0.648 | 3.90E-30 | 8 Crip1      |
| 5.47E-34 | 0.553875499  | 0.729 | 0.416 | 7.21E-30 | 8 Gm9493     |
| 4.23E-33 | 0.662019934  | 0.61  | 0.32  | 5.58E-29 | 8 Nop10      |
| 5.91E-33 | 0.458381018  | 0.921 | 0.734 | 7.80E-29 | 8 Rpl24      |
| 6.62E-33 | -1.362678925 | 0.314 | 0.567 | 8.73E-29 | 8 Chil3      |
| 8.12E-33 | 0.629030569  | 0.52  | 0.239 | 1.07E-28 | 8 Ncl        |
| 8.16E-33 | 0.451363525  | 0.919 | 0.697 | 1.08E-28 | 8 Rpl28      |

|          |              |       |       |          |             |
|----------|--------------|-------|-------|----------|-------------|
| 1.45E-32 | 0.416958032  | 0.924 | 0.696 | 1.92E-28 | 8 Rpl31     |
| 2.83E-32 | 0.403623738  | 0.94  | 0.752 | 3.73E-28 | 8 Rpl17     |
| 3.65E-32 | 0.40245387   | 0.938 | 0.797 | 4.81E-28 | 8 Rps24     |
| 4.48E-32 | -2.001577512 | 0.832 | 0.85  | 5.91E-28 | 8 Ngp       |
| 9.44E-32 | 0.561073907  | 0.702 | 0.385 | 1.25E-27 | 8 Rpl36-ps3 |
| 1.64E-31 | -1.313863454 | 0.168 | 0.455 | 2.17E-27 | 8 Lgals3    |
| 1.95E-31 | -1.864356273 | 0.333 | 0.554 | 2.58E-27 | 8 Ltf       |
| 2.49E-31 | 0.571253852  | 0.602 | 0.308 | 3.28E-27 | 8 Ranbp1    |
| 4.71E-31 | 0.50536698   | 0.813 | 0.556 | 6.21E-27 | 8 mt-Nd4    |
| 1.44E-30 | 0.368607436  | 0.973 | 0.844 | 1.89E-26 | 8 Rpl13     |
| 2.18E-30 | 0.564616073  | 0.675 | 0.365 | 2.87E-26 | 8 Npm1      |
| 2.26E-30 | 0.695899171  | 0.374 | 0.153 | 2.98E-26 | 8 P4hb      |
| 3.17E-30 | 0.469950232  | 0.856 | 0.624 | 4.18E-26 | 8 Sec61g    |
| 6.92E-30 | 0.374573511  | 0.973 | 0.773 | 9.12E-26 | 8 Rps5      |
| 1.05E-29 | 0.668623124  | 0.45  | 0.205 | 1.39E-25 | 8 Ssr1      |
| 1.12E-29 | 0.597366676  | 0.331 | 0.123 | 1.47E-25 | 8 Med21     |
| 1.27E-29 | 0.592932484  | 0.436 | 0.19  | 1.67E-25 | 8 Ssr4      |
| 1.94E-29 | 0.333133499  | 0.986 | 0.867 | 2.56E-25 | 8 Rpl18a    |
| 2.89E-29 | 0.297706214  | 1     | 0.978 | 3.81E-25 | 8 mt-Co1    |
| 2.94E-29 | 0.576483902  | 0.734 | 0.462 | 3.88E-25 | 8 Rps27l    |
| 8.38E-29 | 0.413292255  | 0.908 | 0.71  | 1.11E-24 | 8 Rpl27a    |
| 4.33E-28 | -1.127486722 | 0.322 | 0.557 | 5.71E-24 | 8 Psap      |
| 4.54E-28 | 0.449798659  | 0.875 | 0.649 | 5.99E-24 | 8 Rps20     |
| 4.84E-28 | 0.405304032  | 0.894 | 0.706 | 6.39E-24 | 8 Rpl11     |
| 5.04E-28 | 0.520831694  | 0.705 | 0.418 | 6.64E-24 | 8 Ybx1      |
| 6.72E-28 | 0.567697358  | 0.257 | 0.084 | 8.87E-24 | 8 Atp8b4    |
| 8.89E-28 | 0.510648953  | 0.778 | 0.492 | 1.17E-23 | 8 Cbx3      |
| 1.13E-27 | -1.580829902 | 0.908 | 0.932 | 1.49E-23 | 8 Camp      |
| 1.56E-27 | 0.505584697  | 0.724 | 0.422 | 2.05E-23 | 8 Gm10073   |
| 1.57E-27 | 0.612289418  | 0.455 | 0.209 | 2.07E-23 | 8 Cd63      |
| 1.58E-27 | 0.368892675  | 0.954 | 0.761 | 2.09E-23 | 8 Rps3a1    |

|          |              |       |       |          |             |
|----------|--------------|-------|-------|----------|-------------|
| 1.61E-27 | 0.588825318  | 0.347 | 0.138 | 2.12E-23 | 8 Manf      |
| 1.94E-27 | 0.464255809  | 0.854 | 0.618 | 2.56E-23 | 8 Uba52     |
| 4.28E-27 | 0.725974672  | 0.322 | 0.129 | 5.64E-23 | 8 Snhg9     |
| 5.12E-27 | 0.344053018  | 0.951 | 0.796 | 6.75E-23 | 8 Rpl34     |
| 5.48E-27 | 0.508128261  | 0.71  | 0.435 | 7.23E-23 | 8 Atpif1    |
| 7.92E-27 | 0.483761987  | 0.734 | 0.449 | 1.05E-22 | 8 Rpl30     |
| 1.33E-26 | 0.658240008  | 0.515 | 0.27  | 1.76E-22 | 8 Cmtm7     |
| 1.38E-26 | 0.382749877  | 0.935 | 0.733 | 1.82E-22 | 8 Rps15     |
| 1.52E-26 | 0.505351284  | 0.694 | 0.411 | 2.01E-22 | 8 Serbp1    |
| 2.04E-26 | 0.54156996   | 0.591 | 0.316 | 2.69E-22 | 8 Clec12a   |
| 6.70E-26 | 0.469007231  | 0.743 | 0.459 | 8.84E-22 | 8 Rps26-ps1 |
| 1.01E-25 | 0.400618462  | 0.905 | 0.67  | 1.34E-21 | 8 Rpsa      |
| 1.92E-25 | -0.726721779 | 0.545 | 0.693 | 2.53E-21 | 8 Cyba      |
| 2.25E-25 | 0.411924518  | 0.873 | 0.668 | 2.97E-21 | 8 Rpl27     |
| 1.54E-24 | -0.486151345 | 0.995 | 0.998 | 2.03E-20 | 8 Malat1    |
| 2.45E-24 | 0.478007195  | 0.58  | 0.326 | 3.23E-20 | 8 Hsp90b1   |
| 4.11E-24 | 0.504830588  | 0.615 | 0.363 | 5.42E-20 | 8 Eif5a     |
| 4.46E-24 | 0.675712324  | 0.442 | 0.222 | 5.88E-20 | 8 Abhd2     |
| 5.18E-24 | 0.556400187  | 0.537 | 0.293 | 6.83E-20 | 8 Canx      |
| 6.84E-24 | 0.465958998  | 0.683 | 0.403 | 9.03E-20 | 8 Hsp90ab1  |
| 3.36E-23 | 0.455653229  | 0.707 | 0.435 | 4.44E-19 | 8 Uqcr11    |
| 9.06E-23 | -1.52932978  | 0.141 | 0.372 | 1.19E-18 | 8 Ifi2712a  |
| 1.94E-22 | 0.348490138  | 0.94  | 0.799 | 2.56E-18 | 8 Rps16     |
| 2.12E-22 | 0.465178258  | 0.669 | 0.417 | 2.80E-18 | 8 Rpl5      |
| 2.26E-22 | 0.339877851  | 0.897 | 0.736 | 2.99E-18 | 8 Rpl9      |
| 7.23E-22 | 0.539399669  | 0.499 | 0.265 | 9.54E-18 | 8 mt-Nd4l   |
| 7.66E-22 | 0.328722061  | 0.913 | 0.698 | 1.01E-17 | 8 Rplp0     |
| 1.26E-21 | 0.508996229  | 0.556 | 0.312 | 1.66E-17 | 8 Hsp90aa1  |
| 1.88E-21 | 0.515362593  | 0.431 | 0.214 | 2.48E-17 | 8 Nme1      |
| 2.07E-21 | 0.352268392  | 0.916 | 0.714 | 2.73E-17 | 8 Rps4x     |
| 3.32E-21 | -1.064547328 | 0.106 | 0.329 | 4.38E-17 | 8 Lsp1      |



|          |              |       |       |          |              |
|----------|--------------|-------|-------|----------|--------------|
| 4.72E-21 | 0.289376187  | 0.949 | 0.8   | 6.22E-17 | 8 Rpl13a     |
| 6.41E-21 | 0.579036213  | 0.371 | 0.177 | 8.45E-17 | 8 Ramp1      |
| 7.14E-21 | 0.401405008  | 0.832 | 0.644 | 9.42E-17 | 8 mt-Co2     |
| 7.30E-21 | 0.562657442  | 0.393 | 0.194 | 9.63E-17 | 8 Hspa5      |
| 8.71E-21 | 0.613176759  | 0.417 | 0.213 | 1.15E-16 | 8 Rpgr1p1    |
| 9.34E-21 | 0.332994874  | 0.908 | 0.677 | 1.23E-16 | 8 Hmgb1      |
| 1.58E-20 | 0.446066905  | 0.707 | 0.456 | 2.08E-16 | 8 Rpl29      |
| 1.82E-20 | 0.371326015  | 0.821 | 0.587 | 2.41E-16 | 8 Rpl3       |
| 2.66E-20 | 0.387826287  | 0.732 | 0.454 | 3.51E-16 | 8 Gm8730     |
| 4.72E-20 | 0.414225487  | 0.751 | 0.506 | 6.23E-16 | 8 Snrpg      |
| 5.55E-20 | 0.55825947   | 0.336 | 0.155 | 7.32E-16 | 8 Paip1      |
| 1.32E-19 | 0.509265201  | 0.585 | 0.361 | 1.74E-15 | 8 Tmem256    |
| 1.35E-19 | 0.560341915  | 0.29  | 0.125 | 1.78E-15 | 8 Sephs2     |
| 2.27E-19 | 0.382550357  | 0.808 | 0.565 | 2.99E-15 | 8 Rpl15      |
| 2.90E-19 | 0.427283979  | 0.531 | 0.299 | 3.82E-15 | 8 Cycs       |
| 3.16E-19 | -0.566027039 | 0.566 | 0.694 | 4.16E-15 | 8 Actg1      |
| 3.44E-19 | 0.3097082    | 0.932 | 0.758 | 4.54E-15 | 8 Rpl21      |
| 4.55E-19 | 0.351628465  | 0.802 | 0.562 | 6.01E-15 | 8 Rpl10a     |
| 5.52E-19 | 0.349253451  | 0.837 | 0.647 | 7.28E-15 | 8 Rps10      |
| 5.66E-19 | 0.50680683   | 0.371 | 0.184 | 7.46E-15 | 8 St13       |
| 5.99E-19 | 0.373723208  | 0.775 | 0.561 | 7.90E-15 | 8 Rpl36al    |
| 6.14E-19 | 0.508302974  | 0.293 | 0.128 | 8.10E-15 | 8 Csgalnact2 |
| 7.57E-19 | 0.352581631  | 0.816 | 0.574 | 9.99E-15 | 8 Hmgn2      |
| 7.80E-19 | 0.54366162   | 0.388 | 0.194 | 1.03E-14 | 8 Tacc1      |
| 1.34E-18 | 0.460303659  | 0.252 | 0.102 | 1.77E-14 | 8 Ifngr1     |
| 1.35E-18 | 0.388277738  | 0.743 | 0.521 | 1.78E-14 | 8 Atp5k      |
| 1.43E-18 | -1.085992669 | 0.068 | 0.269 | 1.88E-14 | 8 Gm9844     |
| 1.81E-18 | 0.411889717  | 0.618 | 0.384 | 2.39E-14 | 8 Tomm7      |
| 2.86E-18 | 0.342771676  | 0.854 | 0.635 | 3.77E-14 | 8 Rpl8       |
| 3.07E-18 | 0.507065836  | 0.257 | 0.108 | 4.05E-14 | 8 Atp6ap2    |
| 3.35E-18 | 0.304565399  | 0.913 | 0.752 | 4.42E-14 | 8 Rps3       |

|          |              |       |       |          |             |
|----------|--------------|-------|-------|----------|-------------|
| 4.64E-18 | 0.47397659   | 0.369 | 0.182 | 6.13E-14 | 8 Gm10320   |
| 9.31E-18 | 0.346093594  | 0.816 | 0.599 | 1.23E-13 | 8 Gm11808   |
| 9.60E-18 | 0.403814008  | 0.737 | 0.512 | 1.27E-13 | 8 Tma7      |
| 1.01E-17 | 0.300421103  | 0.883 | 0.68  | 1.33E-13 | 8 Rps13     |
| 2.67E-17 | 0.539585692  | 0.257 | 0.113 | 3.53E-13 | 8 Cenpw     |
| 4.40E-17 | 0.441772086  | 0.255 | 0.109 | 5.80E-13 | 8 Nars      |
| 5.03E-17 | 0.343008208  | 0.818 | 0.577 | 6.63E-13 | 8 Rpl4      |
| 7.97E-17 | 0.470690792  | 0.331 | 0.161 | 1.05E-12 | 8 Ddx21     |
| 8.07E-17 | 0.28646245   | 0.897 | 0.711 | 1.06E-12 | 8 Rpl19     |
| 9.03E-17 | 0.47860073   | 0.252 | 0.109 | 1.19E-12 | 8 Pdia6     |
| 1.19E-16 | 0.47683316   | 0.553 | 0.354 | 1.56E-12 | 8 Gsr       |
| 1.60E-16 | -1.457456939 | 0.992 | 0.995 | 2.10E-12 | 8 S100a9    |
| 1.75E-16 | 0.415170503  | 0.369 | 0.188 | 2.31E-12 | 8 Al662270  |
| 1.94E-16 | 0.406916179  | 0.599 | 0.372 | 2.56E-12 | 8 Eif2s2    |
| 3.17E-16 | 0.424564491  | 0.667 | 0.463 | 4.18E-12 | 8 Rpl27-ps3 |
| 4.52E-16 | 0.362956713  | 0.724 | 0.486 | 5.96E-12 | 8 Rpl7a     |
| 5.12E-16 | 0.441399194  | 0.412 | 0.229 | 6.76E-12 | 8 Cks1b     |
| 7.65E-16 | 0.401106755  | 0.412 | 0.218 | 1.01E-11 | 8 Hspe1     |
| 7.88E-16 | 0.457956123  | 0.566 | 0.361 | 1.04E-11 | 8 Srsf2     |
| 7.89E-16 | 0.448090492  | 0.355 | 0.182 | 1.04E-11 | 8 Dut       |
| 8.44E-16 | 0.461639224  | 0.425 | 0.241 | 1.11E-11 | 8 Ndufb2    |
| 8.74E-16 | -0.911896446 | 0.266 | 0.439 | 1.15E-11 | 8 Anxa1     |
| 9.52E-16 | 0.368353327  | 0.713 | 0.499 | 1.26E-11 | 8 Pabpc1    |
| 1.62E-15 | 0.486111944  | 0.336 | 0.171 | 2.13E-11 | 8 Pdia3     |
| 1.67E-15 | 0.414087     | 0.396 | 0.214 | 2.21E-11 | 8 Krtcap2   |
| 1.80E-15 | 0.43073382   | 0.485 | 0.287 | 2.37E-11 | 8 Ndufc1    |
| 1.97E-15 | -0.651183564 | 0.379 | 0.537 | 2.59E-11 | 8 Coro1a    |
| 2.27E-15 | 0.468011133  | 0.556 | 0.362 | 2.99E-11 | 8 Srrm2     |
| 2.67E-15 | 0.450877397  | 0.472 | 0.273 | 3.52E-11 | 8 Eef1g     |
| 3.22E-15 | 0.347762624  | 0.661 | 0.421 | 4.25E-11 | 8 Rpl13-ps3 |
| 4.17E-15 | 0.408877018  | 0.656 | 0.461 | 5.50E-11 | 8 Ndufa4    |

|          |              |       |       |          |                 |
|----------|--------------|-------|-------|----------|-----------------|
| 4.18E-15 | 0.477645632  | 0.363 | 0.194 | 5.51E-11 | 8 Supt16        |
| 4.84E-15 | 0.383459359  | 0.591 | 0.384 | 6.39E-11 | 8 Dstn          |
| 5.27E-15 | 0.468052433  | 0.266 | 0.125 | 6.95E-11 | 8 Lsm7          |
| 6.23E-15 | 0.474881466  | 0.482 | 0.291 | 8.22E-11 | 8 Erh           |
| 7.03E-15 | 0.394437631  | 0.588 | 0.38  | 9.28E-11 | 8 Gm8186        |
| 7.83E-15 | 0.397898496  | 0.537 | 0.334 | 1.03E-10 | 8 H2afy         |
| 8.29E-15 | 0.450863956  | 0.423 | 0.243 | 1.09E-10 | 8 Eif3a         |
| 1.07E-14 | 0.523076864  | 0.268 | 0.133 | 1.41E-10 | 8 Dtymk         |
| 1.13E-14 | 0.396269876  | 0.461 | 0.273 | 1.50E-10 | 8 Gm10269       |
| 1.17E-14 | 0.372864136  | 0.686 | 0.465 | 1.55E-10 | 8 F630028O10Rik |
| 1.22E-14 | 0.441589915  | 0.363 | 0.196 | 1.61E-10 | 8 Ndufa5        |
| 1.43E-14 | 0.429523625  | 0.428 | 0.246 | 1.88E-10 | 8 Alyref        |
| 1.45E-14 | 0.410354067  | 0.407 | 0.224 | 1.91E-10 | 8 Usp50         |
| 1.59E-14 | 0.482358511  | 0.276 | 0.134 | 2.10E-10 | 8 Npm3          |
| 2.05E-14 | 0.342857412  | 0.648 | 0.436 | 2.71E-10 | 8 Rpl9-ps6      |
| 2.11E-14 | 0.42130185   | 0.314 | 0.16  | 2.79E-10 | 8 Tomm20        |
| 3.09E-14 | 0.4924461    | 0.293 | 0.149 | 4.08E-10 | 8 Dpy30         |
| 3.22E-14 | -0.675123003 | 0.192 | 0.376 | 4.25E-10 | 8 Emp3          |
| 3.37E-14 | 0.260390857  | 0.921 | 0.784 | 4.44E-10 | 8 Ppia          |
| 3.77E-14 | 0.359154838  | 0.542 | 0.339 | 4.98E-10 | 8 Rpl6l         |
| 4.34E-14 | 0.399261174  | 0.295 | 0.145 | 5.72E-10 | 8 Rnaset2a      |
| 4.93E-14 | 0.397748209  | 0.322 | 0.167 | 6.51E-10 | 8 Mrpl23        |
| 5.72E-14 | 0.486333208  | 0.396 | 0.228 | 7.55E-10 | 8 Ptges3        |
| 7.35E-14 | 0.414611652  | 0.36  | 0.196 | 9.70E-10 | 8 Rasgrp2       |
| 9.89E-14 | 0.365637186  | 0.507 | 0.306 | 1.30E-09 | 8 Eef1b2        |
| 1.17E-13 | 0.369959658  | 0.444 | 0.26  | 1.55E-09 | 8 Romo1         |
| 1.27E-13 | -0.814915412 | 0.157 | 0.325 | 1.67E-09 | 8 Ptprc         |
| 1.44E-13 | 0.416765377  | 0.333 | 0.18  | 1.90E-09 | 8 Eif3j1        |
| 1.44E-13 | -0.958613841 | 0.117 | 0.284 | 1.90E-09 | 8 Ccr2          |
| 1.45E-13 | 0.435310267  | 0.306 | 0.159 | 1.92E-09 | 8 Ssr3          |
| 2.06E-13 | 0.489282887  | 0.257 | 0.128 | 2.72E-09 | 8 Rsl24d1       |

|          |              |       |       |          |                 |
|----------|--------------|-------|-------|----------|-----------------|
| 5.40E-13 | 0.366605156  | 0.336 | 0.181 | 7.12E-09 | 8 2700094K13Rik |
| 5.57E-13 | -0.758919655 | 0.209 | 0.373 | 7.34E-09 | 8 Lst1          |
| 5.99E-13 | -0.797263434 | 0.108 | 0.273 | 7.90E-09 | 8 S100a10       |
| 6.84E-13 | -0.475945379 | 0.724 | 0.774 | 9.03E-09 | 8 B2m           |
| 8.37E-13 | 0.35189678   | 0.312 | 0.163 | 1.10E-08 | 8 Tmed3         |
| 9.34E-13 | 0.546816913  | 0.257 | 0.131 | 1.23E-08 | 8 Ythdf2        |
| 1.10E-12 | 0.354113062  | 0.637 | 0.44  | 1.45E-08 | 8 Usmg5         |
| 1.26E-12 | 0.384904912  | 0.444 | 0.277 | 1.66E-08 | 8 Eif4a1        |
| 1.50E-12 | 0.367689938  | 0.523 | 0.338 | 1.98E-08 | 8 Cox7b         |
| 1.84E-12 | 0.257696764  | 0.799 | 0.603 | 2.43E-08 | 8 Ly6c2         |
| 2.00E-12 | 0.459277106  | 0.268 | 0.139 | 2.63E-08 | 8 Rbm15         |
| 2.83E-12 | -0.819816675 | 0.103 | 0.259 | 3.73E-08 | 8 Tmcc1         |
| 2.93E-12 | 0.444165912  | 0.274 | 0.142 | 3.87E-08 | 8 Nhp2          |
| 2.95E-12 | 0.36997883   | 0.396 | 0.228 | 3.89E-08 | 8 Park7         |
| 3.09E-12 | -0.601393088 | 0.566 | 0.647 | 4.07E-08 | 8 Fth1          |
| 3.27E-12 | 0.390344015  | 0.412 | 0.248 | 4.32E-08 | 8 Gm10282       |
| 3.50E-12 | 0.296700183  | 0.753 | 0.557 | 4.62E-08 | 8 Hnrnpa2b1     |
| 4.42E-12 | 0.416538383  | 0.409 | 0.248 | 5.83E-08 | 8 Lsm6          |
| 4.74E-12 | 0.372746647  | 0.407 | 0.242 | 6.25E-08 | 8 Ndufb3        |
| 4.85E-12 | 0.400429311  | 0.295 | 0.158 | 6.40E-08 | 8 Baz1a         |
| 9.47E-12 | 0.277737547  | 0.661 | 0.455 | 1.25E-07 | 8 Rpl10-ps3     |
| 9.71E-12 | 0.316701315  | 0.496 | 0.311 | 1.28E-07 | 8 Gm10036       |
| 1.21E-11 | 0.389750803  | 0.374 | 0.221 | 1.59E-07 | 8 Spcs2         |
| 1.28E-11 | 0.325648373  | 0.32  | 0.175 | 1.69E-07 | 8 Gm6133        |
| 1.78E-11 | 0.347080406  | 0.436 | 0.267 | 2.35E-07 | 8 Arglu1        |
| 2.12E-11 | 0.32479557   | 0.469 | 0.295 | 2.80E-07 | 8 Tsix          |
| 2.19E-11 | 0.311196931  | 0.58  | 0.386 | 2.89E-07 | 8 mt-Atp8       |
| 2.20E-11 | 0.350593509  | 0.637 | 0.465 | 2.90E-07 | 8 H2afj         |
| 2.47E-11 | 0.333601013  | 0.539 | 0.355 | 3.25E-07 | 8 Ran           |
| 2.61E-11 | 0.285668674  | 0.767 | 0.616 | 3.45E-07 | 8 Cox6c         |
| 2.92E-11 | 0.335440196  | 0.472 | 0.294 | 3.85E-07 | 8 mt-Nd2        |

|          |              |       |       |          |                 |
|----------|--------------|-------|-------|----------|-----------------|
| 3.30E-11 | 0.285354855  | 0.743 | 0.535 | 4.35E-07 | 8 Rpl7          |
| 4.10E-11 | 0.313763027  | 0.336 | 0.189 | 5.41E-07 | 8 Llph          |
| 5.41E-11 | 0.309325141  | 0.491 | 0.322 | 7.13E-07 | 8 Lsm5          |
| 8.49E-11 | 0.399355385  | 0.285 | 0.158 | 1.12E-06 | 8 G3bp1         |
| 1.08E-10 | 0.283656625  | 0.393 | 0.231 | 1.42E-06 | 8 Eif5b         |
| 1.11E-10 | -0.479845457 | 0.569 | 0.65  | 1.46E-06 | 8 Prdx5         |
| 1.30E-10 | 0.424388249  | 0.309 | 0.18  | 1.72E-06 | 8 Skp1a         |
| 1.58E-10 | 0.397430655  | 0.369 | 0.226 | 2.08E-06 | 8 Snrpd3        |
| 2.04E-10 | 0.321405348  | 0.466 | 0.296 | 2.70E-06 | 8 Polr2l        |
| 2.14E-10 | 0.276276397  | 0.575 | 0.396 | 2.82E-06 | 8 Uqcrq         |
| 2.55E-10 | 0.333150436  | 0.466 | 0.295 | 3.37E-06 | 8 Hnrnpm        |
| 3.33E-10 | 0.402690299  | 0.301 | 0.169 | 4.40E-06 | 8 Tnfaip8       |
| 4.21E-10 | 0.376085888  | 0.355 | 0.215 | 5.56E-06 | 8 Pgam1         |
| 4.35E-10 | 0.332531728  | 0.61  | 0.444 | 5.74E-06 | 8 Uqcr10        |
| 5.42E-10 | 0.329825496  | 0.447 | 0.292 | 7.15E-06 | 8 Sfpq          |
| 5.48E-10 | -0.686720335 | 0.13  | 0.264 | 7.23E-06 | 8 Anxa2         |
| 5.68E-10 | 0.306605142  | 0.491 | 0.327 | 7.50E-06 | 8 Nucks1        |
| 7.21E-10 | 0.359886695  | 0.317 | 0.187 | 9.51E-06 | 8 Tuba4a        |
| 7.54E-10 | 0.344458986  | 0.352 | 0.213 | 9.95E-06 | 8 Swi5          |
| 7.73E-10 | 0.365098854  | 0.293 | 0.169 | 1.02E-05 | 8 Siva1         |
| 7.86E-10 | 0.259598182  | 0.618 | 0.428 | 1.04E-05 | 8 Gnb2l1        |
| 8.10E-10 | 0.389025428  | 0.276 | 0.156 | 1.07E-05 | 8 Lig1          |
| 8.22E-10 | 0.419075444  | 0.336 | 0.2   | 1.08E-05 | 8 Fcnb          |
| 8.64E-10 | -0.636660375 | 0.607 | 0.633 | 1.14E-05 | 8 Cst3          |
| 9.85E-10 | 0.282539292  | 0.607 | 0.416 | 1.30E-05 | 8 Hint1         |
| 9.93E-10 | 0.349429558  | 0.447 | 0.298 | 1.31E-05 | 8 Pcbp1         |
| 1.05E-09 | 0.361306289  | 0.266 | 0.148 | 1.38E-05 | 8 1110001J03Rik |
| 1.07E-09 | 0.31378246   | 0.255 | 0.137 | 1.41E-05 | 8 Smim4         |
| 1.12E-09 | 0.351420229  | 0.282 | 0.159 | 1.48E-05 | 8 Stra13        |
| 1.14E-09 | 0.310487573  | 0.271 | 0.15  | 1.50E-05 | 8 Ndufa12       |
| 1.57E-09 | 0.343733981  | 0.341 | 0.204 | 2.07E-05 | 8 Serpinb1a     |

|          |              |       |       |             |   |         |
|----------|--------------|-------|-------|-------------|---|---------|
| 1.58E-09 | -0.454456522 | 0.469 | 0.561 | 2.08E-05    | 8 | Calm1   |
| 1.61E-09 | 0.441828098  | 0.336 | 0.21  | 2.13E-05    | 8 | Birc6   |
| 1.62E-09 | 0.38360715   | 0.401 | 0.254 | 2.14E-05    | 8 | Snrpd2  |
| 1.64E-09 | 0.331845455  | 0.369 | 0.228 | 2.17E-05    | 8 | Metap2  |
| 1.69E-09 | 0.334422934  | 0.304 | 0.177 | 2.23E-05    | 8 | Erdr1   |
| 2.67E-09 | 0.303268605  | 0.447 | 0.295 | 3.52E-05    | 8 | Uqcrb   |
| 2.99E-09 | 0.400394929  | 0.282 | 0.164 | 3.94E-05    | 8 | Pdcd5   |
| 4.65E-09 | -0.359839619 | 0.645 | 0.713 | 6.13E-05    | 8 | Myl6    |
| 5.61E-09 | 0.298221122  | 0.423 | 0.273 | 7.41E-05    | 8 | Hnrnpab |
| 7.03E-09 | 0.270087248  | 0.575 | 0.402 | 9.27E-05    | 8 | Chchd2  |
| 7.22E-09 | -0.323876766 | 0.762 | 0.776 | 9.52E-05    | 8 | H3f3a   |
| 8.16E-09 | 0.319172346  | 0.534 | 0.377 | 0.000107577 | 8 | Tmem258 |
| 8.28E-09 | 0.320716892  | 0.252 | 0.14  | 0.000109202 | 8 | Chchd1  |
| 8.38E-09 | 0.277920741  | 0.618 | 0.467 | 0.00011055  | 8 | Cox7a2  |
| 1.04E-08 | 0.308303177  | 0.436 | 0.292 | 0.000136866 | 8 | Ost4    |
| 1.39E-08 | 0.292586082  | 0.572 | 0.415 | 0.000183033 | 8 | Arpp19  |
| 1.42E-08 | -0.61303922  | 0.198 | 0.324 | 0.000186774 | 8 | Ms4a6c  |
| 1.44E-08 | 0.264563421  | 0.344 | 0.21  | 0.000190119 | 8 | Tmed10  |
| 1.71E-08 | 0.258113367  | 0.748 | 0.594 | 0.000225277 | 8 | Atp5e   |
| 1.86E-08 | 0.372130759  | 0.309 | 0.192 | 0.000245701 | 8 | Caprin1 |
| 1.87E-08 | 0.335076194  | 0.388 | 0.255 | 0.000247105 | 8 | Prrc2c  |
| 2.19E-08 | 0.437694739  | 0.252 | 0.146 | 0.000288693 | 8 | Comt    |
| 2.19E-08 | -0.653569808 | 0.141 | 0.261 | 0.000289247 | 8 | Btg1    |
| 2.29E-08 | -1.29787994  | 0.997 | 0.999 | 0.0003019   | 8 | S100a8  |
| 2.38E-08 | 0.315554365  | 0.407 | 0.268 | 0.00031405  | 8 | Lamtor2 |
| 3.22E-08 | -0.602760393 | 0.176 | 0.298 | 0.000425026 | 8 | Mgst1   |
| 5.74E-08 | 0.289672579  | 0.393 | 0.262 | 0.000757651 | 8 | Tmed2   |
| 6.40E-08 | 0.285657855  | 0.496 | 0.354 | 0.000844755 | 8 | Eif4g2  |
| 6.55E-08 | -0.564342583 | 0.144 | 0.263 | 0.000864122 | 8 | Vim     |
| 6.92E-08 | -0.468725305 | 0.358 | 0.457 | 0.000912665 | 8 | Alox5ap |
| 8.65E-08 | 0.282875364  | 0.252 | 0.146 | 0.00114111  | 8 | Ostc    |

|          |              |       |       |             |                 |
|----------|--------------|-------|-------|-------------|-----------------|
| 8.97E-08 | 0.309967685  | 0.271 | 0.161 | 0.001182741 | 8 Yme1l1        |
| 1.03E-07 | 0.281614495  | 0.425 | 0.291 | 0.001359188 | 8 Atp5g2        |
| 1.48E-07 | 0.268462615  | 0.306 | 0.19  | 0.001945841 | 8 2410015M20Rik |
| 1.49E-07 | -0.513415708 | 0.22  | 0.335 | 0.001970236 | 8 Cd53          |
| 1.59E-07 | 0.260694839  | 0.683 | 0.543 | 0.002098951 | 8 Cox6b1        |
| 1.94E-07 | -0.552302301 | 0.152 | 0.265 | 0.002556288 | 8 Ucp2          |
| 2.01E-07 | 0.345581078  | 0.325 | 0.212 | 0.002644825 | 8 Hnrnpul1      |
| 2.05E-07 | 0.264074749  | 0.382 | 0.255 | 0.002709132 | 8 Vapa          |
| 2.45E-07 | 0.262194501  | 0.369 | 0.238 | 0.003232709 | 8 Srp9          |
| 3.57E-07 | 0.314669014  | 0.358 | 0.24  | 0.004713833 | 8 Hnrnph1       |
| 4.19E-07 | 0.307025752  | 0.266 | 0.161 | 0.005529094 | 8 Cited2        |
| 4.43E-07 | 0.294879896  | 0.268 | 0.161 | 0.005838836 | 8 Pfdn2         |
| 1.01E-06 | 0.256166535  | 0.447 | 0.319 | 0.013351176 | 8 Ndufa7        |
| 1.07E-06 | -0.47357942  | 0.534 | 0.58  | 0.014156803 | 8 H2-D1         |
| 1.21E-06 | 0.303016846  | 0.29  | 0.186 | 0.015976028 | 8 Sf3b5         |
| 2.09E-06 | 0.293051663  | 0.287 | 0.187 | 0.027574582 | 8 Polr2k        |
| 2.11E-06 | -0.466342982 | 0.157 | 0.264 | 0.027810289 | 8 Lmo4          |
| 2.36E-06 | 0.289790588  | 0.355 | 0.246 | 0.031079082 | 8 Timm13        |
| 2.69E-06 | 0.279392358  | 0.317 | 0.21  | 0.035489627 | 8 Slc25a3       |
| 2.73E-06 | 0.264931386  | 0.295 | 0.193 | 0.036035975 | 8 Gm10020       |
| 2.79E-06 | -0.530175231 | 0.179 | 0.272 | 0.036836367 | 8 Cotl1         |
| 6.89E-06 | 0.251567781  | 0.322 | 0.22  | 0.090852827 | 8 Lsm4          |
| 9.49E-06 | -0.257077039 | 0.691 | 0.693 | 0.125189768 | 8 Sh3bgrl3      |
| 9.72E-06 | -1.053783712 | 0.669 | 0.628 | 0.128212716 | 8 Wfdc21        |
| 1.14E-05 | 0.288413132  | 0.268 | 0.179 | 0.150698742 | 8 Sypl          |
| 1.19E-05 | 0.306816473  | 0.255 | 0.168 | 0.157543002 | 8 Naa38         |
| 1.31E-05 | -0.385794273 | 0.285 | 0.377 | 0.17325146  | 8 Arpc5         |
| 2.96E-05 | 0.285120239  | 0.26  | 0.175 | 0.390903397 | 8 Dnmt1         |
| 3.03E-05 | 0.301822898  | 0.274 | 0.187 | 0.400109369 | 8 Rrm2          |
| 3.08E-05 | -0.330232659 | 0.358 | 0.436 | 0.405659549 | 8 Serinc3       |
| 3.11E-05 | -0.700423247 | 0.425 | 0.449 | 0.409941921 | 8 Pglyrp1       |

|            |              |       |       |             |   |              |
|------------|--------------|-------|-------|-------------|---|--------------|
| 3.47E-05   | 0.295639184  | 0.255 | 0.173 | 0.457846143 | 8 | Smarca5      |
| 3.72E-05   | 0.29061703   | 0.29  | 0.199 | 0.491119857 | 8 | Pan3         |
| 9.07E-05   | 0.25892214   | 0.268 | 0.182 | 1           | 8 | Cap1         |
| 0.00012606 | -0.364412721 | 0.355 | 0.421 | 1           | 8 | Cdc42        |
| 0.00013077 | -0.302476693 | 0.436 | 0.493 | 1           | 8 | Arpc2        |
| 0.00029343 | -0.394084846 | 0.209 | 0.284 | 1           | 8 | Lcp1         |
| 0.00039813 | -0.414712386 | 0.184 | 0.254 | 1           | 8 | Ostf1        |
| 0.00042271 | -0.389623425 | 0.276 | 0.341 | 1           | 8 | Clic1        |
| 0.00047844 | -0.335809809 | 0.209 | 0.285 | 1           | 8 | Rap1b        |
| 0.00051047 | -0.382960748 | 0.211 | 0.282 | 1           | 8 | Iqgap1       |
| 0.00094796 | -0.338922737 | 0.22  | 0.289 | 1           | 8 | Tmpo         |
| 0.00095662 | -0.278063622 | 0.851 | 0.775 | 1           | 8 | Hmgb2        |
| 0.00118445 | -0.381715377 | 0.388 | 0.431 | 1           | 8 | Prdx1        |
| 0.00148646 | -0.343980478 | 0.222 | 0.288 | 1           | 8 | Cd44         |
| 0.00198343 | -0.365466251 | 0.266 | 0.326 | 1           | 8 | Npc2         |
| 0.00290795 | -0.280574615 | 0.317 | 0.371 | 1           | 8 | Capza2       |
| 0.00306956 | -0.285705219 | 0.195 | 0.259 | 1           | 8 | Flna         |
| 0.00379662 | -0.302099843 | 0.455 | 0.464 | 1           | 8 | Rac2         |
| 0.00426912 | -0.364784385 | 0.252 | 0.296 | 1           | 8 | Laptm5       |
| 0.00717594 | -0.266258075 | 0.225 | 0.278 | 1           | 8 | Aldh2        |
| 0.00735073 | -0.307585427 | 0.228 | 0.28  | 1           | 8 | Reep5        |
| 0.00755834 | -0.286198171 | 0.564 | 0.583 | 1           | 8 | S100a11      |
| 0          | 2.579738724  | 0.71  | 0.029 | 0           | 9 | Siglech      |
| 0          | 2.523141786  | 0.662 | 0.042 | 0           | 9 | Cox6a2       |
| 0          | 2.511162531  | 0.907 | 0.145 | 0           | 9 | Bst2         |
| 0          | 2.449824196  | 0.808 | 0.092 | 0           | 9 | Tcf4         |
| 0          | 1.980860514  | 0.369 | 0.007 | 0           | 9 | Ccr9         |
| 0          | 1.689518085  | 0.293 | 0.002 | 0           | 9 | D13Erttd608e |
| 5.48E-282  | 2.3542833    | 0.721 | 0.099 | 7.23E-278   | 9 | Ly6d         |
| 3.95E-262  | 2.121077476  | 0.859 | 0.185 | 5.22E-258   | 9 | Irf8         |
| 8.68E-225  | 1.943883546  | 0.721 | 0.125 | 1.15E-220   | 9 | Cd74         |

plasmacytoid DC



|           |              |       |       |           |           |
|-----------|--------------|-------|-------|-----------|-----------|
| 6.75E-223 | 1.816751033  | 0.349 | 0.02  | 8.90E-219 | 9 Ctsl    |
| 2.60E-221 | 1.909262931  | 0.558 | 0.069 | 3.43E-217 | 9 Runx2   |
| 2.37E-202 | 1.592662354  | 0.318 | 0.018 | 3.12E-198 | 9 Spib    |
| 7.44E-193 | 1.235492035  | 1     | 0.997 | 9.81E-189 | 9 Malat1  |
| 4.00E-190 | 1.973757933  | 0.608 | 0.106 | 5.28E-186 | 9 Dnajc7  |
| 8.33E-190 | 1.852954996  | 0.561 | 0.086 | 1.10E-185 | 9 Rnase6  |
| 9.82E-189 | 1.728324026  | 0.276 | 0.014 | 1.30E-184 | 9 Ly6a    |
| 7.98E-178 | 1.583241701  | 0.49  | 0.063 | 1.05E-173 | 9 H2-Aa   |
| 6.48E-176 | 1.581182224  | 0.299 | 0.019 | 8.55E-172 | 9 Ccnd1   |
| 7.84E-142 | 1.388220014  | 0.963 | 0.624 | 1.03E-137 | 9 Fth1    |
| 2.07E-133 | 1.542431802  | 0.439 | 0.068 | 2.73E-129 | 9 H2-Ab1  |
| 3.80E-128 | 1.524332931  | 0.301 | 0.031 | 5.02E-124 | 9 Atp1b1  |
| 8.88E-128 | 1.448071163  | 0.296 | 0.03  | 1.17E-123 | 9 Cd7     |
| 2.07E-123 | 1.604350044  | 0.361 | 0.05  | 2.73E-119 | 9 Lair1   |
| 2.27E-115 | 1.579871987  | 0.521 | 0.123 | 2.99E-111 | 9 Bcl11a  |
| 1.18E-97  | 1.023860732  | 0.932 | 0.696 | 1.56E-93  | 9 Rpl31   |
| 5.02E-97  | 1.489103872  | 0.369 | 0.068 | 6.62E-93  | 9 Nucb2   |
| 2.44E-96  | 1.433130736  | 0.313 | 0.048 | 3.22E-92  | 9 Smim5   |
| 5.83E-92  | 0.598634387  | 1     | 0.978 | 7.69E-88  | 9 mt-Co1  |
| 7.52E-90  | -1.733039774 | 0.611 | 0.923 | 9.91E-86  | 9 Lyz2    |
| 5.62E-85  | -1.442095683 | 0.321 | 0.806 | 7.42E-81  | 9 Hmgb2   |
| 2.76E-83  | 0.828053868  | 0.963 | 0.806 | 3.64E-79  | 9 Tyrobp  |
| 2.10E-82  | 1.484967555  | 0.307 | 0.054 | 2.78E-78  | 9 Sema4b  |
| 7.54E-82  | 0.589413664  | 1     | 0.954 | 9.94E-78  | 9 Rps27   |
| 1.21E-81  | 0.929169985  | 0.89  | 0.523 | 1.59E-77  | 9 Psap    |
| 9.43E-81  | 1.312355281  | 0.555 | 0.192 | 1.24E-76  | 9 Ctsb    |
| 4.41E-79  | 1.377585697  | 0.341 | 0.07  | 5.82E-75  | 9 Tspan13 |
| 2.42E-77  | -1.110252572 | 0.42  | 0.843 | 3.19E-73  | 9 H2afz   |
| 2.12E-74  | 0.970677638  | 0.837 | 0.457 | 2.79E-70  | 9 Lgals1  |
| 2.82E-68  | 1.286898736  | 0.47  | 0.152 | 3.72E-64  | 9 Pld4    |
| 1.72E-61  | 1.25308203   | 0.434 | 0.14  | 2.27E-57  | 9 Ctsh    |

|          |              |       |       |          |                 |
|----------|--------------|-------|-------|----------|-----------------|
| 1.78E-61 | 0.6494613    | 0.963 | 0.837 | 2.34E-57 | 9 Rps27rt       |
| 8.36E-61 | 1.017419542  | 0.746 | 0.49  | 1.10E-56 | 9 Mbnl1         |
| 5.87E-60 | 0.628575983  | 0.983 | 0.852 | 7.74E-56 | 9 mt-Atp6       |
| 1.34E-56 | 1.149067995  | 0.482 | 0.179 | 1.76E-52 | 9 Mpeg1         |
| 1.97E-54 | 0.837273653  | 0.792 | 0.564 | 2.60E-50 | 9 H2-D1         |
| 6.20E-54 | 0.711855846  | 0.896 | 0.763 | 8.18E-50 | 9 B2m           |
| 5.46E-52 | -1.753805977 | 0.152 | 0.576 | 7.21E-48 | 9 Chil3         |
| 2.64E-51 | 0.441136686  | 0.994 | 0.952 | 3.48E-47 | 9 mt-Co3        |
| 8.11E-50 | 0.821327821  | 0.735 | 0.453 | 1.07E-45 | 9 Ly6e          |
| 1.32E-48 | 1.168906438  | 0.468 | 0.197 | 1.75E-44 | 9 Grn           |
| 1.48E-48 | 1.117418342  | 0.349 | 0.108 | 1.96E-44 | 9 Mef2c         |
| 3.85E-48 | 0.759075972  | 0.806 | 0.627 | 5.08E-44 | 9 Xist          |
| 1.35E-45 | -1.95302502  | 0.287 | 0.65  | 1.77E-41 | 9 Wfdc21        |
| 2.48E-45 | -1.841177818 | 0.076 | 0.469 | 3.28E-41 | 9 Pglyrp1       |
| 1.38E-44 | 1.158109768  | 0.256 | 0.065 | 1.82E-40 | 9 Cyth4         |
| 8.68E-44 | -0.445783247 | 0.992 | 0.996 | 1.15E-39 | 9 Tmsb4x        |
| 1.02E-43 | -1.53418236  | 0.031 | 0.418 | 1.35E-39 | 9 Dstn          |
| 1.14E-43 | -1.933061705 | 0.206 | 0.579 | 1.50E-39 | 9 Lcn2          |
| 8.07E-42 | 1.158513171  | 0.383 | 0.145 | 1.06E-37 | 9 St8sia4       |
| 3.72E-41 | -1.667986927 | 0.037 | 0.405 | 4.90E-37 | 9 Hist1h2ap     |
| 6.42E-41 | -2.03294732  | 0.994 | 0.999 | 8.47E-37 | 9 S100a8        |
| 5.13E-40 | -1.217496936 | 0.11  | 0.499 | 6.77E-36 | 9 F630028O10Rik |
| 2.25E-39 | -1.151497464 | 0.231 | 0.608 | 2.96E-35 | 9 Hmgn2         |
| 4.35E-39 | -1.429062044 | 0.079 | 0.45  | 5.74E-35 | 9 Anxa1         |
| 5.94E-38 | -1.768779492 | 0.22  | 0.56  | 7.83E-34 | 9 Ltf           |
| 1.44E-37 | 0.576707846  | 0.89  | 0.684 | 1.90E-33 | 9 Rpl10         |
| 6.12E-36 | -1.407543947 | 0.025 | 0.359 | 8.08E-32 | 9 Ifitm2        |
| 9.46E-36 | 0.486586151  | 0.93  | 0.801 | 1.25E-31 | 9 Rpl13a        |
| 3.49E-34 | 0.936775655  | 0.561 | 0.346 | 4.60E-30 | 9 H2-K1         |
| 6.90E-34 | -1.22011366  | 0.223 | 0.578 | 9.10E-30 | 9 Ifitm3        |
| 1.87E-33 | -1.235731999 | 0.115 | 0.457 | 2.47E-29 | 9 Lgals3        |

|          |              |       |       |          |                 |
|----------|--------------|-------|-------|----------|-----------------|
| 4.09E-33 | -1.959237371 | 0.825 | 0.937 | 5.39E-29 | 9 Camp          |
| 7.37E-33 | 0.414800841  | 0.98  | 0.876 | 9.72E-29 | 9 Rps14         |
| 1.98E-32 | -2.041369422 | 0.989 | 0.995 | 2.61E-28 | 9 S100a9        |
| 3.70E-32 | 0.533751682  | 0.845 | 0.735 | 4.88E-28 | 9 H3f3b         |
| 3.82E-32 | -2.052067637 | 0.665 | 0.86  | 5.04E-28 | 9 Ngp           |
| 5.80E-32 | 0.973740698  | 0.358 | 0.152 | 7.65E-28 | 9 Sepw1         |
| 8.44E-32 | 0.913413011  | 0.465 | 0.242 | 1.11E-27 | 9 Btg1          |
| 1.83E-31 | 0.462378699  | 0.932 | 0.786 | 2.42E-27 | 9 Rps11         |
| 3.25E-31 | 0.99521681   | 0.287 | 0.103 | 4.29E-27 | 9 H2-T23        |
| 1.25E-30 | -1.4183856   | 0.068 | 0.377 | 1.65E-26 | 9 Ifitm6        |
| 1.40E-30 | -0.852088574 | 0.242 | 0.601 | 1.85E-26 | 9 S100a11       |
| 4.04E-30 | -0.974448999 | 0.135 | 0.473 | 5.33E-26 | 9 Hp            |
| 6.71E-30 | -1.141521977 | 0.068 | 0.381 | 8.85E-26 | 9 Lst1          |
| 7.32E-30 | -1.216099762 | 0.037 | 0.335 | 9.66E-26 | 9 Top2a         |
| 2.80E-29 | 1.163672879  | 0.268 | 0.096 | 3.69E-25 | 9 Insig1        |
| 3.12E-29 | 0.551732828  | 0.837 | 0.696 | 4.12E-25 | 9 mt-Cytb       |
| 1.83E-28 | -0.61587906  | 0.476 | 0.792 | 2.41E-24 | 9 H3f3a         |
| 6.24E-28 | 1.050763168  | 0.273 | 0.103 | 8.23E-24 | 9 Snx5          |
| 1.00E-27 | 0.945988699  | 0.428 | 0.235 | 1.32E-23 | 9 Pgl3          |
| 1.59E-27 | 1.006105559  | 0.265 | 0.097 | 2.10E-23 | 9 Bmp2k         |
| 2.19E-27 | 1.021331073  | 0.299 | 0.123 | 2.89E-23 | 9 Rnaset2b      |
| 4.03E-27 | -1.115947922 | 0.062 | 0.349 | 5.32E-23 | 9 2810417H13Rik |
| 1.10E-26 | 0.433296571  | 0.851 | 0.674 | 1.45E-22 | 9 Plac8         |
| 1.96E-26 | -0.957672757 | 0.085 | 0.382 | 2.59E-22 | 9 Gsr           |
| 3.46E-26 | 0.744511237  | 0.583 | 0.423 | 4.57E-22 | 9 Serinc3       |
| 1.28E-25 | 0.937049803  | 0.279 | 0.109 | 1.69E-21 | 9 Ly86          |
| 1.33E-25 | -0.666114391 | 0.355 | 0.683 | 1.76E-21 | 9 Arhgdib       |
| 2.22E-24 | -0.922898735 | 0.087 | 0.369 | 2.93E-20 | 9 Msrb1         |
| 5.18E-24 | 0.593605171  | 0.699 | 0.563 | 6.84E-20 | 9 mt-Nd4        |
| 7.34E-24 | 0.926774856  | 0.315 | 0.141 | 9.68E-20 | 9 Trim30a       |
| 9.35E-24 | -0.837938169 | 0.068 | 0.341 | 1.23E-19 | 9 Cks2          |

|          |              |       |       |          |            |
|----------|--------------|-------|-------|----------|------------|
| 6.65E-23 | -0.84728368  | 0.073 | 0.342 | 8.78E-19 | 9 Ap3s1    |
| 7.81E-23 | 0.851676724  | 0.428 | 0.254 | 1.03E-18 | 9 Gnas     |
| 1.75E-22 | -0.741173099 | 0.144 | 0.44  | 2.31E-18 | 9 Tkt      |
| 2.43E-22 | -0.730259656 | 0.138 | 0.429 | 3.21E-18 | 9 Stmn1    |
| 4.40E-22 | -0.982573605 | 0.039 | 0.28  | 5.81E-18 | 9 Cotl1    |
| 6.70E-22 | 0.910510281  | 0.38  | 0.209 | 8.84E-18 | 9 Smim14   |
| 7.05E-22 | 0.699205631  | 0.496 | 0.306 | 9.30E-18 | 9 Lsp1     |
| 8.48E-22 | 0.841461728  | 0.268 | 0.113 | 1.12E-17 | 9 Unc93b1  |
| 3.40E-21 | 0.555683849  | 0.732 | 0.613 | 4.49E-17 | 9 mt-Nd1   |
| 4.69E-21 | -1.008626364 | 0.039 | 0.27  | 6.18E-17 | 9 Cebpb    |
| 4.69E-21 | -0.924427849 | 0.037 | 0.269 | 6.19E-17 | 9 Flna     |
| 4.87E-21 | -0.617109459 | 0.372 | 0.661 | 6.43E-17 | 9 Prdx5    |
| 6.77E-21 | -1.010686259 | 0.048 | 0.279 | 8.93E-17 | 9 Clec4a2  |
| 8.45E-21 | -0.932377371 | 0.062 | 0.304 | 1.11E-16 | 9 Mgst1    |
| 5.34E-20 | 0.749576001  | 0.454 | 0.295 | 7.04E-16 | 9 mt-Nd2   |
| 5.79E-20 | -0.89614495  | 0.045 | 0.27  | 7.63E-16 | 9 Gm10282  |
| 7.11E-20 | -0.664044202 | 0.149 | 0.429 | 9.38E-16 | 9 Gapdh    |
| 8.35E-20 | 0.904669289  | 0.369 | 0.211 | 1.10E-15 | 9 Fgfr1op2 |
| 8.41E-20 | -0.764616001 | 0.245 | 0.512 | 1.11E-15 | 9 Tubb5    |
| 9.25E-20 | 0.845455723  | 0.315 | 0.161 | 1.22E-15 | 9 Cd164    |
| 1.28E-19 | -0.831043587 | 0.045 | 0.271 | 1.69E-15 | 9 Aprt     |
| 1.67E-19 | -1.008665129 | 0.096 | 0.33  | 2.20E-15 | 9 Ms4a6c   |
| 7.78E-19 | 0.845318583  | 0.372 | 0.211 | 1.03E-14 | 9 Selplg   |
| 2.46E-18 | 0.752211031  | 0.47  | 0.333 | 3.25E-14 | 9 Hsp90b1  |
| 3.11E-18 | -0.686963008 | 0.127 | 0.382 | 4.10E-14 | 9 Tuba1b   |
| 4.00E-18 | -0.620479543 | 0.186 | 0.46  | 5.27E-14 | 9 Gmfg     |
| 5.09E-18 | -0.412215913 | 0.532 | 0.795 | 6.72E-14 | 9 Shfm1    |
| 6.54E-18 | -0.77730808  | 0.138 | 0.383 | 8.62E-14 | 9 Myh9     |
| 1.49E-17 | -0.81081042  | 0.085 | 0.309 | 1.97E-13 | 9 Cd24a    |
| 4.09E-17 | 0.81874631   | 0.372 | 0.221 | 5.40E-13 | 9 Sell     |
| 6.20E-17 | 0.702821862  | 0.485 | 0.356 | 8.18E-13 | 9 Serp1    |

|          |              |       |       |          |             |
|----------|--------------|-------|-------|----------|-------------|
| 1.57E-16 | -0.499882681 | 0.507 | 0.743 | 2.07E-12 | 9 Cd52      |
| 2.05E-16 | 0.819164136  | 0.327 | 0.185 | 2.71E-12 | 9 Ogt       |
| 2.70E-16 | 0.587865804  | 0.361 | 0.197 | 3.56E-12 | 9 Ctss      |
| 5.16E-16 | -0.555158269 | 0.208 | 0.465 | 6.81E-12 | 9 Atpif1    |
| 5.18E-16 | -0.550795981 | 0.149 | 0.392 | 6.83E-12 | 9 Lbr       |
| 6.43E-16 | -0.568369492 | 0.175 | 0.422 | 8.48E-12 | 9 Anp32b    |
| 8.89E-16 | -0.755334896 | 0.068 | 0.267 | 1.17E-11 | 9 Vim       |
| 1.18E-15 | -0.582127971 | 0.172 | 0.411 | 1.56E-11 | 9 Actr3     |
| 1.32E-15 | -0.591806361 | 0.107 | 0.33  | 1.73E-11 | 9 Capza1    |
| 1.69E-15 | 0.431398346  | 0.724 | 0.651 | 2.22E-11 | 9 mt-Co2    |
| 1.79E-15 | -0.580086423 | 0.135 | 0.368 | 2.36E-11 | 9 Fam49b    |
| 2.24E-15 | 0.426725058  | 0.727 | 0.632 | 2.95E-11 | 9 Sec61g    |
| 2.33E-15 | 0.790952801  | 0.31  | 0.175 | 3.07E-11 | 9 Kctd12    |
| 6.07E-15 | -0.591236349 | 0.09  | 0.296 | 8.00E-11 | 9 Tmpo      |
| 8.59E-15 | -1.141033711 | 0.093 | 0.283 | 1.13E-10 | 9 Prtn3     |
| 1.12E-14 | -0.478229543 | 0.225 | 0.484 | 1.48E-10 | 9 Txn1      |
| 1.14E-14 | -0.98306478  | 0.476 | 0.646 | 1.51E-10 | 9 Crip1     |
| 1.39E-14 | -0.789831039 | 0.073 | 0.26  | 1.83E-10 | 9 Tmcc1     |
| 1.40E-14 | -0.59078222  | 0.079 | 0.282 | 1.85E-10 | 9 Aldoa     |
| 1.61E-14 | -0.422381707 | 0.794 | 0.845 | 2.12E-10 | 9 Ptma      |
| 1.63E-14 | -1.49277532  | 0.076 | 0.257 | 2.14E-10 | 9 Elane     |
| 1.89E-14 | 0.694561601  | 0.375 | 0.244 | 2.49E-10 | 9 Psmb8     |
| 3.24E-14 | -0.591568803 | 0.099 | 0.303 | 4.27E-10 | 9 Pkm       |
| 5.05E-14 | -0.401999557 | 0.439 | 0.701 | 6.66E-10 | 9 Actg1     |
| 5.84E-14 | -0.574640206 | 0.065 | 0.251 | 7.71E-10 | 9 Rnaseh2c  |
| 5.93E-14 | 0.314219479  | 0.856 | 0.788 | 7.82E-10 | 9 Ppia      |
| 8.65E-14 | 0.564552295  | 0.555 | 0.462 | 1.14E-09 | 9 Rpl10-ps3 |
| 1.41E-13 | 0.261654464  | 0.946 | 0.87  | 1.86E-09 | 9 Rpl18a    |
| 1.45E-13 | -0.568464793 | 0.079 | 0.268 | 1.92E-09 | 9 Lmo4      |
| 1.51E-13 | -0.512751196 | 0.186 | 0.416 | 1.99E-09 | 9 Dbi       |
| 1.70E-13 | -0.540223607 | 0.093 | 0.288 | 2.25E-09 | 9 Bola2     |

|          |              |       |       |          |                 |
|----------|--------------|-------|-------|----------|-----------------|
| 2.25E-13 | 0.60528142   | 0.439 | 0.315 | 2.96E-09 | 9 Npc2          |
| 2.78E-13 | -0.453650895 | 0.169 | 0.397 | 3.67E-09 | 9 1810037117Rik |
| 3.34E-13 | -0.46363553  | 0.096 | 0.292 | 4.41E-09 | 9 Hnrnpab       |
| 3.78E-13 | 0.540396005  | 0.535 | 0.462 | 4.99E-09 | 9 Cd47          |
| 8.07E-13 | -1.049443584 | 0.104 | 0.28  | 1.06E-08 | 9 Mpo           |
| 1.04E-12 | -0.505207796 | 0.163 | 0.38  | 1.37E-08 | 9 Dek           |
| 1.58E-12 | -0.442724806 | 0.994 | 1     | 2.08E-08 | 9 Actb          |
| 1.99E-12 | -0.549993197 | 0.099 | 0.285 | 2.63E-08 | 9 Aldh2         |
| 2.36E-12 | -0.470479892 | 0.29  | 0.521 | 3.12E-08 | 9 Cbx3          |
| 2.40E-12 | -0.442040472 | 0.301 | 0.549 | 3.16E-08 | 9 Mrpl33        |
| 3.33E-12 | -0.459520647 | 0.141 | 0.347 | 4.40E-08 | 9 Nucks1        |
| 4.66E-12 | -0.427798773 | 0.175 | 0.388 | 6.15E-08 | 9 H2afv         |
| 1.00E-11 | -0.466278677 | 0.115 | 0.303 | 1.32E-07 | 9 Ppp1cb        |
| 1.86E-11 | -0.636923265 | 0.099 | 0.267 | 2.45E-07 | 9 Gm9844        |
| 2.26E-11 | -0.443009579 | 0.113 | 0.299 | 2.98E-07 | 9 Ywhah         |
| 2.34E-11 | 0.258661694  | 0.831 | 0.719 | 3.09E-07 | 9 Rps4x         |
| 3.44E-11 | -0.319973431 | 0.462 | 0.729 | 4.54E-07 | 9 Cfl1          |
| 3.53E-11 | -0.405153791 | 0.115 | 0.303 | 4.65E-07 | 9 Nap1l1        |
| 3.74E-11 | -0.684640595 | 0.377 | 0.541 | 4.94E-07 | 9 S100a6        |
| 5.41E-11 | -0.358145839 | 0.499 | 0.721 | 7.13E-07 | 9 Myl6          |
| 1.08E-10 | 0.635184658  | 0.327 | 0.218 | 1.43E-06 | 9 Psme2         |
| 1.88E-10 | 0.668799671  | 0.262 | 0.157 | 2.48E-06 | 9 Ctsz          |
| 2.12E-10 | -0.418801992 | 0.146 | 0.334 | 2.80E-06 | 9 Scp2          |
| 2.56E-10 | -0.371896331 | 0.099 | 0.266 | 3.38E-06 | 9 Alyref        |
| 3.83E-10 | -0.558131911 | 0.113 | 0.273 | 5.05E-06 | 9 S100a10       |
| 5.11E-10 | 0.338681067  | 0.721 | 0.695 | 6.74E-06 | 9 Oaz1          |
| 5.22E-10 | -0.388843133 | 0.11  | 0.278 | 6.88E-06 | 9 Gpi1          |
| 7.09E-10 | 0.699172578  | 0.318 | 0.219 | 9.35E-06 | 9 Rpgr1p1       |
| 7.34E-10 | -0.406325151 | 0.273 | 0.468 | 9.68E-06 | 9 Rps12-ps3     |
| 8.65E-10 | -0.360909738 | 0.158 | 0.342 | 1.14E-05 | 9 Lsm5          |
| 8.97E-10 | -0.466562402 | 0.096 | 0.251 | 1.18E-05 | 9 Zfp36l2       |

|          |              |       |       |             |            |
|----------|--------------|-------|-------|-------------|------------|
| 1.08E-09 | 0.29851793   | 0.814 | 0.717 | 1.42E-05    | 9 Rpl19    |
| 1.59E-09 | -0.493642523 | 0.127 | 0.288 | 2.10E-05    | 9 Slpi     |
| 1.96E-09 | -0.35302367  | 0.276 | 0.489 | 2.59E-05    | 9 Gng5     |
| 3.00E-09 | -0.428250341 | 0.11  | 0.265 | 3.95E-05    | 9 Anxa2    |
| 4.03E-09 | 0.352395299  | 0.476 | 0.352 | 5.31E-05    | 9 Ifi27l2a |
| 4.93E-09 | -0.301068556 | 0.22  | 0.423 | 6.50E-05    | 9 Atox1    |
| 6.32E-09 | -0.638092574 | 0.135 | 0.282 | 8.34E-05    | 9 Ccr2     |
| 7.08E-09 | -0.289378788 | 0.234 | 0.438 | 9.33E-05    | 9 Ndufb7   |
| 8.96E-09 | 0.378388436  | 0.614 | 0.571 | 0.000118249 | 9 Rpl36a1  |
| 2.00E-08 | -0.304596979 | 0.211 | 0.402 | 0.000264018 | 9 Ywhaz    |
| 2.76E-08 | 0.624555365  | 0.313 | 0.225 | 0.000364561 | 9 Rrbp1    |
| 2.83E-08 | -0.367425296 | 0.169 | 0.334 | 0.000373241 | 9 Ranbp1   |
| 3.35E-08 | -0.301791461 | 0.13  | 0.285 | 0.000441614 | 9 Rac1     |
| 6.03E-08 | 0.432479005  | 0.541 | 0.505 | 0.000795208 | 9 Sec61b   |
| 7.25E-08 | -0.288438543 | 0.242 | 0.438 | 0.000956612 | 9 Rbm3     |
| 1.34E-07 | 0.407264192  | 0.566 | 0.54  | 0.001764652 | 9 Ubb      |
| 1.88E-07 | -0.263457545 | 0.344 | 0.545 | 0.002480505 | 9 Atp5k    |
| 2.64E-07 | -0.322597491 | 0.132 | 0.273 | 0.003488509 | 9 Gnb1     |
| 8.40E-07 | 0.478406985  | 0.389 | 0.33  | 0.011085272 | 9 Irf2bp2  |
| 1.86E-06 | -0.757801235 | 0.732 | 0.74  | 0.024518778 | 9 Tmsb10   |
| 2.25E-06 | 0.499980552  | 0.344 | 0.284 | 0.029737791 | 9 Tagln2   |
| 2.68E-06 | 0.316562914  | 0.642 | 0.598 | 0.035400221 | 9 Rpl3     |
| 3.38E-06 | -0.329393173 | 0.563 | 0.665 | 0.044553029 | 9 Rps12    |
| 1.18E-05 | -0.298663999 | 0.175 | 0.301 | 0.156304369 | 9 Sat1     |
| 1.21E-05 | -0.253639107 | 0.208 | 0.349 | 0.159315033 | 9 Set      |
| 1.28E-05 | 0.347286961  | 0.496 | 0.462 | 0.169128366 | 9 Rac2     |
| 1.30E-05 | 0.581387967  | 0.285 | 0.227 | 0.172078008 | 9 Spcs2    |
| 3.37E-05 | 0.303114462  | 0.628 | 0.65  | 0.445053805 | 9 Itm2b    |
| 3.89E-05 | 0.595150516  | 0.265 | 0.207 | 0.512891408 | 9 Tram1    |
| 5.96E-05 | 0.523782912  | 0.265 | 0.208 | 0.786166057 | 9 Fus      |
| 7.11E-05 | 0.342224373  | 0.279 | 0.208 | 0.938097459 | 9 Ahnak    |

|            |              |       |       |   |           |
|------------|--------------|-------|-------|---|-----------|
| 0.00013923 | 0.605384212  | 0.27  | 0.222 | 1 | 9 Krtcap2 |
| 0.00043869 | -0.719027246 | 0.335 | 0.485 | 1 | 9 Retnlg  |
| 0.00051092 | 0.420944451  | 0.361 | 0.333 | 1 | 9 Pomp    |
| 0.00067933 | 0.369412678  | 0.361 | 0.326 | 1 | 9 Cd53    |
| 0.00078489 | 0.397063944  | 0.383 | 0.363 | 1 | 9 Son     |
| 0.00137838 | 0.375113781  | 0.33  | 0.292 | 1 | 9 Laptm5  |
| 0.00156519 | 0.442213536  | 0.259 | 0.22  | 1 | 9 Gltscr2 |
| 0.00848106 | 0.415749448  | 0.268 | 0.242 | 1 | 9 Rap1a   |
| 0.00906724 | 0.369262578  | 0.315 | 0.304 | 1 | 9 Tsix    |
| 0.00918761 | 0.29510345   | 0.389 | 0.386 | 1 | 9 Tmem258 |

|           |             |       |       |           |             |
|-----------|-------------|-------|-------|-----------|-------------|
| 9.16E-160 | 1.847357759 | 0.791 | 0.196 | 1.21E-155 | 10 Wfdc17   |
| 2.59E-135 | 1.51143059  | 0.976 | 0.539 | 3.41E-131 | 10 Ifitm3   |
| 5.58E-127 | 1.356390306 | 0.253 | 0.017 | 7.36E-123 | 10 Sirpb1c  |
| 7.19E-116 | 1.0712853   | 1     | 0.901 | 9.48E-112 | 10 Lyz2     |
| 3.53E-111 | 1.624304228 | 0.397 | 0.059 | 4.66E-107 | 10 Gngt2    |
| 2.61E-106 | 1.4893792   | 0.839 | 0.336 | 3.44E-102 | 10 Ifi27l2a |
| 6.78E-97  | 1.479456017 | 0.64  | 0.186 | 8.95E-93  | 10 Ctss     |
| 1.29E-91  | 1.801560521 | 0.497 | 0.116 | 1.71E-87  | 10 Apoe     |
| 4.67E-83  | 1.214557875 | 0.647 | 0.206 | 6.15E-79  | 10 S100a4   |
| 1.03E-80  | 1.294802061 | 0.312 | 0.048 | 1.36E-76  | 10 Clec4a3  |
| 7.14E-74  | 1.027917951 | 0.945 | 0.672 | 9.42E-70  | 10 Plac8    |
| 7.98E-73  | 1.298899273 | 0.548 | 0.166 | 1.05E-68  | 10 Ccl6     |
| 1.66E-71  | 0.981108593 | 0.89  | 0.527 | 2.20E-67  | 10 Psap     |
| 8.09E-71  | 1.244152885 | 0.661 | 0.256 | 1.07E-66  | 10 Ccr2     |
| 1.18E-70  | 0.983819265 | 0.901 | 0.619 | 1.56E-66  | 10 Cst3     |
| 5.99E-70  | 1.293524532 | 0.339 | 0.065 | 7.90E-66  | 10 Csf1r    |
| 2.73E-68  | 1.38799775  | 0.387 | 0.088 | 3.60E-64  | 10 Ms4a4c   |
| 1.03E-62  | 0.739415858 | 0.962 | 0.808 | 1.36E-58  | 10 Tyrobp   |
| 1.67E-62  | 1.283723215 | 0.51  | 0.169 | 2.21E-58  | 10 Samhd1   |
| 9.09E-62  | 1.151443341 | 0.264 | 0.044 | 1.20E-57  | 10 Clec4a1  |
| 2.66E-61  | 0.822797426 | 0.928 | 0.763 | 3.51E-57  | 10 B2m      |

**Monocyte**



|          |              |       |       |          |    |        |
|----------|--------------|-------|-------|----------|----|--------|
| 1.44E-59 | 0.739216508  | 0.952 | 0.814 | 1.90E-55 | 10 | Ftl1   |
| 8.19E-59 | 1.097183984  | 0.678 | 0.3   | 1.08E-54 | 10 | Ms4a6c |
| 4.70E-54 | 0.855419607  | 0.853 | 0.517 | 6.20E-50 | 10 | S100a6 |
| 5.81E-53 | 1.111710549  | 0.682 | 0.349 | 7.66E-49 | 10 | Lst1   |
| 8.93E-52 | -1.703435965 | 0.13  | 0.609 | 1.18E-47 | 10 | Hmgn2  |
| 1.05E-50 | 0.647568602  | 0.99  | 0.728 | 1.39E-46 | 10 | Tmsb10 |
| 4.36E-50 | 0.684525163  | 0.935 | 0.623 | 5.75E-46 | 10 | Crip1  |
| 1.17E-47 | 0.38558007   | 1     | 0.997 | 1.54E-43 | 10 | Malat1 |
| 1.65E-47 | -1.111936846 | 0.493 | 0.793 | 2.18E-43 | 10 | Hmgb2  |
| 5.42E-47 | 1.181244653  | 0.342 | 0.093 | 7.14E-43 | 10 | Ms4a6b |
| 3.98E-45 | 0.843937172  | 0.801 | 0.566 | 5.26E-41 | 10 | H2-D1  |
| 1.90E-44 | 0.98445446   | 0.616 | 0.308 | 2.50E-40 | 10 | Npc2   |
| 3.01E-42 | 0.668105252  | 0.908 | 0.705 | 3.97E-38 | 10 | Fcer1g |
| 3.12E-38 | 0.394537338  | 0.997 | 0.955 | 4.11E-34 | 10 | Rps27  |
| 2.83E-37 | 1.063475858  | 0.277 | 0.075 | 3.73E-33 | 10 | Cx3cr1 |
| 1.54E-36 | 1.036434002  | 0.346 | 0.112 | 2.04E-32 | 10 | Ccl9   |
| 9.93E-35 | 0.768720516  | 0.702 | 0.426 | 1.31E-30 | 10 | Lgals3 |
| 2.91E-34 | -1.834610447 | 0.312 | 0.645 | 3.84E-30 | 10 | Wfdc21 |
| 2.54E-31 | -1.745696697 | 0.216 | 0.557 | 3.35E-27 | 10 | Ltf    |
| 2.70E-31 | 1.097217841  | 0.284 | 0.09  | 3.56E-27 | 10 | Sepp1  |
| 2.88E-31 | 0.741734241  | 0.702 | 0.458 | 3.80E-27 | 10 | Ly6e   |
| 1.18E-30 | -0.865365183 | 0.387 | 0.705 | 1.56E-26 | 10 | Hmgb1  |
| 1.53E-29 | 1.012255188  | 0.295 | 0.098 | 2.02E-25 | 10 | Marcks |
| 2.01E-29 | 0.303329748  | 1     | 0.996 | 2.66E-25 | 10 | Tmsb4x |
| 6.27E-29 | -0.715955958 | 0.736 | 0.847 | 8.26E-25 | 10 | Ptma   |
| 8.01E-29 | -1.730803594 | 0.264 | 0.572 | 1.06E-24 | 10 | Lcn2   |
| 8.02E-29 | 0.879038471  | 0.466 | 0.225 | 1.06E-24 | 10 | Zeb2   |
| 2.47E-28 | 0.970495575  | 0.507 | 0.284 | 3.25E-24 | 10 | Sat1   |
| 2.68E-28 | 0.532542745  | 0.873 | 0.723 | 3.54E-24 | 10 | Cd52   |
| 2.96E-28 | -1.127779053 | 0.168 | 0.513 | 3.90E-24 | 10 | Tubb5  |
| 2.51E-27 | 0.436981704  | 0.945 | 0.869 | 3.31E-23 | 10 | Rps9   |

|          |              |       |       |          |    |               |
|----------|--------------|-------|-------|----------|----|---------------|
| 3.23E-27 | 0.970331219  | 0.305 | 0.11  | 4.26E-23 | 10 | Ly86          |
| 5.67E-27 | -1.824410038 | 0.089 | 0.399 | 7.48E-23 | 10 | Hist1h2ap     |
| 8.57E-27 | 0.953364725  | 0.305 | 0.112 | 1.13E-22 | 10 | Mndal         |
| 6.17E-26 | 0.399574899  | 0.942 | 0.84  | 8.14E-22 | 10 | Rps27rt       |
| 6.67E-26 | -1.117412593 | 0.106 | 0.428 | 8.80E-22 | 10 | Stmn1         |
| 1.28E-25 | 0.76384817   | 0.438 | 0.201 | 1.69E-21 | 10 | Ahnak         |
| 4.40E-25 | -1.31724931  | 0.158 | 0.461 | 5.81E-21 | 10 | Pglyrp1       |
| 5.92E-25 | -1.294193842 | 0.038 | 0.332 | 7.81E-21 | 10 | Top2a         |
| 8.03E-25 | -1.264479725 | 0.048 | 0.347 | 1.06E-20 | 10 | 2810417H13Rik |
| 1.36E-24 | -1.927027311 | 0.815 | 0.936 | 1.79E-20 | 10 | Camp          |
| 9.35E-24 | -1.993537466 | 0.979 | 0.995 | 1.23E-19 | 10 | S100a9        |
| 9.39E-24 | -0.939453366 | 0.205 | 0.523 | 1.24E-19 | 10 | Cbx3          |
| 2.87E-23 | 0.782018104  | 0.425 | 0.211 | 3.78E-19 | 10 | Gm2a          |
| 5.66E-23 | 0.910969836  | 0.336 | 0.142 | 7.46E-19 | 10 | Trim30a       |
| 5.73E-23 | 0.840357452  | 0.394 | 0.186 | 7.56E-19 | 10 | Mpeg1         |
| 1.92E-22 | -1.904381147 | 1     | 0.999 | 2.53E-18 | 10 | S100a8        |
| 3.20E-22 | 0.826391977  | 0.329 | 0.141 | 4.22E-18 | 10 | Tpd52         |
| 7.92E-22 | 0.97898484   | 0.301 | 0.124 | 1.05E-17 | 10 | Ifi203        |
| 1.16E-21 | 0.313003913  | 1     | 0.936 | 1.53E-17 | 10 | Rpl37a        |
| 4.07E-21 | -1.190239374 | 0.021 | 0.269 | 5.37E-17 | 10 | Gm10282       |
| 1.05E-20 | 0.35942027   | 0.973 | 0.917 | 1.38E-16 | 10 | Fau           |
| 1.26E-20 | -1.959809456 | 0.736 | 0.855 | 1.66E-16 | 10 | Ngp           |
| 1.37E-20 | 0.769028706  | 0.445 | 0.241 | 1.81E-16 | 10 | Tmcc1         |
| 6.18E-20 | 0.711338132  | 0.408 | 0.201 | 8.16E-16 | 10 | Fn1           |
| 2.70E-19 | 0.777177846  | 0.507 | 0.332 | 3.56E-15 | 10 | Ifitm2        |
| 3.66E-19 | 0.86879728   | 0.284 | 0.12  | 4.83E-15 | 10 | Rgs2          |
| 4.22E-19 | 0.516385371  | 0.342 | 0.149 | 5.57E-15 | 10 | Cd74          |
| 2.26E-18 | 0.794067878  | 0.414 | 0.232 | 2.98E-14 | 10 | Slfn2         |
| 2.31E-18 | -1.024564821 | 0.062 | 0.307 | 3.05E-14 | 10 | Cd24a         |
| 9.70E-18 | -0.798233461 | 0.113 | 0.38  | 1.28E-13 | 10 | Tuba1b        |
| 1.33E-17 | 0.720728609  | 0.479 | 0.311 | 1.76E-13 | 10 | Gm10116       |

|          |              |       |       |          |    |         |
|----------|--------------|-------|-------|----------|----|---------|
| 3.57E-17 | 0.720107683  | 0.483 | 0.308 | 4.71E-13 | 10 | Ptprc   |
| 4.91E-17 | 0.773743453  | 0.421 | 0.25  | 6.48E-13 | 10 | Cebpb   |
| 5.95E-17 | 0.836147887  | 0.274 | 0.121 | 7.85E-13 | 10 | Ctsc    |
| 1.37E-16 | 0.288129697  | 0.962 | 0.878 | 1.81E-12 | 10 | Rps14   |
| 9.96E-16 | 0.303353029  | 0.962 | 0.873 | 1.31E-11 | 10 | Rps27a  |
| 1.82E-15 | -0.455183495 | 0.664 | 0.798 | 2.40E-11 | 10 | Ppia    |
| 2.36E-15 | -0.696852526 | 0.106 | 0.347 | 3.12E-11 | 10 | Nucks1  |
| 2.68E-15 | 0.368167956  | 0.747 | 0.638 | 3.54E-11 | 10 | Fth1    |
| 5.28E-15 | 0.381400211  | 0.842 | 0.789 | 6.97E-11 | 10 | Gm9843  |
| 5.88E-15 | 0.6643434    | 0.503 | 0.351 | 7.76E-11 | 10 | H2-K1   |
| 1.12E-14 | 0.702313777  | 0.318 | 0.165 | 1.48E-10 | 10 | Sp100   |
| 1.46E-14 | -0.808632684 | 0.202 | 0.44  | 1.93E-10 | 10 | Anxa1   |
| 1.64E-14 | -0.625607117 | 0.168 | 0.42  | 2.16E-10 | 10 | Anp32b  |
| 1.67E-14 | 0.813371878  | 0.267 | 0.128 | 2.20E-10 | 10 | Mcl1    |
| 2.47E-14 | 0.512659688  | 0.589 | 0.444 | 3.25E-10 | 10 | Alox5ap |
| 2.47E-14 | 0.399862221  | 0.818 | 0.741 | 3.26E-10 | 10 | Gpx1    |
| 4.70E-14 | 0.26730978   | 0.979 | 0.869 | 6.20E-10 | 10 | Rpl18a  |
| 5.50E-14 | 0.356522561  | 0.846 | 0.771 | 7.25E-10 | 10 | H3f3a   |
| 5.98E-14 | -0.610869977 | 0.147 | 0.39  | 7.89E-10 | 10 | Lbr     |
| 6.80E-14 | 0.48998334   | 0.634 | 0.495 | 8.97E-10 | 10 | Cybb    |
| 1.12E-13 | 0.353977518  | 0.825 | 0.69  | 1.47E-09 | 10 | Rpl10   |
| 1.16E-13 | 0.695952389  | 0.387 | 0.238 | 1.53E-09 | 10 | Fxyd5   |
| 1.39E-13 | -1.258075378 | 0.086 | 0.282 | 1.84E-09 | 10 | Prtn3   |
| 2.11E-13 | 0.494284482  | 0.63  | 0.523 | 2.79E-09 | 10 | Coro1a  |
| 2.80E-13 | 0.637187092  | 0.483 | 0.347 | 3.69E-09 | 10 | Msrb1   |
| 3.53E-13 | 0.326442719  | 0.86  | 0.739 | 4.66E-09 | 10 | Rpl24   |
| 3.71E-13 | -0.528455994 | 0.147 | 0.387 | 4.89E-09 | 10 | H2afv   |
| 3.85E-13 | -0.602004881 | 0.116 | 0.343 | 5.08E-09 | 10 | Irf2bp2 |
| 5.44E-13 | 0.621224768  | 0.373 | 0.214 | 7.17E-09 | 10 | F13a1   |
| 6.01E-13 | -0.521216925 | 0.339 | 0.593 | 7.93E-09 | 10 | S100a11 |
| 6.64E-13 | -0.645329897 | 0.12  | 0.337 | 8.76E-09 | 10 | Ap3s1   |

|          |              |       |       |          |    |          |
|----------|--------------|-------|-------|----------|----|----------|
| 8.05E-13 | -0.602564087 | 0.151 | 0.376 | 1.06E-08 | 10 | Ran      |
| 8.13E-13 | 0.592977387  | 0.466 | 0.309 | 1.07E-08 | 10 | Lsp1     |
| 1.04E-12 | -0.619301417 | 0.175 | 0.407 | 1.38E-08 | 10 | Dstn     |
| 2.34E-12 | -0.516190159 | 0.086 | 0.29  | 3.08E-08 | 10 | Hnrnpab  |
| 3.22E-12 | 0.603341181  | 0.517 | 0.406 | 4.25E-08 | 10 | Atox1    |
| 3.66E-12 | 0.619107553  | 0.305 | 0.163 | 4.83E-08 | 10 | Pld4     |
| 3.71E-12 | -1.608598997 | 0.079 | 0.255 | 4.90E-08 | 10 | Elane    |
| 5.29E-12 | 0.311918811  | 0.887 | 0.79  | 6.98E-08 | 10 | Rps11    |
| 6.28E-12 | 0.368543847  | 0.784 | 0.704 | 8.29E-08 | 10 | Tpt1     |
| 1.01E-11 | -0.658480195 | 0.168 | 0.379 | 1.33E-07 | 10 | Myh9     |
| 1.62E-11 | 0.454006757  | 0.627 | 0.532 | 2.13E-07 | 10 | Mrpl33   |
| 1.64E-11 | 0.566575296  | 0.346 | 0.205 | 2.16E-07 | 10 | Ctsb     |
| 2.51E-11 | 0.5659737    | 0.39  | 0.248 | 3.31E-07 | 10 | Btg1     |
| 2.86E-11 | -0.526593631 | 0.13  | 0.336 | 3.77E-07 | 10 | Cks2     |
| 3.22E-11 | 0.283453735  | 0.887 | 0.801 | 4.25E-07 | 10 | Rpl34    |
| 3.77E-11 | -0.613072198 | 0.377 | 0.561 | 4.98E-07 | 10 | Chil3    |
| 4.38E-11 | -0.541436877 | 0.24  | 0.461 | 5.77E-07 | 10 | Atpif1   |
| 4.65E-11 | -0.452098662 | 0.247 | 0.48  | 6.13E-07 | 10 | Txn1     |
| 5.52E-10 | 0.625865767  | 0.26  | 0.143 | 7.29E-06 | 10 | Capg     |
| 6.02E-10 | -0.440486647 | 0.175 | 0.382 | 7.94E-06 | 10 | Srsf2    |
| 6.20E-10 | -1.083477625 | 0.113 | 0.277 | 8.17E-06 | 10 | Mpo      |
| 6.33E-10 | 0.574635031  | 0.462 | 0.363 | 8.35E-06 | 10 | Capza2   |
| 7.13E-10 | 0.619049931  | 0.356 | 0.237 | 9.41E-06 | 10 | Zfp36l2  |
| 7.18E-10 | 0.46983203   | 0.538 | 0.423 | 9.47E-06 | 10 | Prdx1    |
| 8.26E-10 | 0.515912909  | 0.38  | 0.25  | 1.09E-05 | 10 | Anxa2    |
| 1.46E-09 | -0.419361422 | 0.349 | 0.57  | 1.92E-05 | 10 | Calm2    |
| 1.71E-09 | -0.510072594 | 0.151 | 0.334 | 2.26E-05 | 10 | Hsp90aa1 |
| 2.16E-09 | -0.444909383 | 0.178 | 0.377 | 2.85E-05 | 10 | Dek      |
| 3.01E-09 | -0.298872922 | 0.705 | 0.825 | 3.98E-05 | 10 | H2afz    |
| 3.13E-09 | -0.469712148 | 0.096 | 0.264 | 4.13E-05 | 10 | Alyref   |
| 3.19E-09 | 0.669717495  | 0.428 | 0.328 | 4.21E-05 | 10 | Notch2   |

|          |              |       |       |             |    |               |
|----------|--------------|-------|-------|-------------|----|---------------|
| 3.37E-09 | 0.626116926  | 0.318 | 0.206 | 4.44E-05    | 10 | Cox7a2l       |
| 5.76E-09 | 0.511016615  | 0.459 | 0.359 | 7.59E-05    | 10 | Serp1         |
| 1.01E-08 | -0.302719693 | 0.366 | 0.577 | 0.000132581 | 10 | Hnrnpa2b1     |
| 1.43E-08 | -0.467776397 | 0.168 | 0.343 | 0.000188534 | 10 | Hnrnpa1       |
| 1.77E-08 | 0.489055407  | 0.377 | 0.252 | 0.000232961 | 10 | Gm9844        |
| 2.60E-08 | 0.629863022  | 0.308 | 0.206 | 0.000343149 | 10 | Lamp1         |
| 3.17E-08 | -0.462319796 | 0.175 | 0.349 | 0.000417963 | 10 | Set           |
| 3.60E-08 | 0.58737678   | 0.322 | 0.219 | 0.000474899 | 10 | Spi1          |
| 3.80E-08 | -0.382953328 | 0.199 | 0.393 | 0.000501161 | 10 | 1810037l17Rik |
| 3.83E-08 | -0.350127259 | 0.332 | 0.543 | 0.000504962 | 10 | Atp5k         |
| 5.47E-08 | -0.374319625 | 0.199 | 0.386 | 0.000721537 | 10 | Eif5a         |
| 5.51E-08 | -0.407098075 | 0.161 | 0.333 | 0.000726361 | 10 | Ranbp1        |
| 5.59E-08 | 0.503621737  | 0.476 | 0.394 | 0.000737725 | 10 | Actr3         |
| 7.79E-08 | -0.394810973 | 0.134 | 0.294 | 0.001027822 | 10 | Tagln2        |
| 1.01E-07 | 0.547928283  | 0.387 | 0.293 | 0.0013351   | 10 | Cdk2ap2       |
| 1.25E-07 | 0.607044764  | 0.253 | 0.155 | 0.001647409 | 10 | Itgal         |
| 1.33E-07 | 0.536103939  | 0.325 | 0.225 | 0.001757657 | 10 | Rrbp1         |
| 1.53E-07 | 0.520547236  | 0.384 | 0.287 | 0.002016052 | 10 | Rsrp1         |
| 1.53E-07 | 0.311856679  | 0.719 | 0.64  | 0.002022233 | 10 | Rpl18         |
| 1.82E-07 | 0.380420849  | 0.551 | 0.463 | 0.002399135 | 10 | Rpl10-ps3     |
| 2.94E-07 | -0.302032993 | 0.168 | 0.34  | 0.003880791 | 10 | Lsm5          |
| 3.42E-07 | -0.38022056  | 0.257 | 0.436 | 0.004509513 | 10 | Serbp1        |
| 4.69E-07 | -0.355965409 | 0.586 | 0.71  | 0.006184181 | 10 | mt-Cytb       |
| 5.15E-07 | 0.535007292  | 0.346 | 0.254 | 0.006789818 | 10 | Ucp2          |
| 5.43E-07 | 0.390833805  | 0.521 | 0.445 | 0.007163746 | 10 | Psm7          |
| 5.49E-07 | 0.297412037  | 0.692 | 0.664 | 0.007241745 | 10 | Cox4i1        |
| 6.14E-07 | 0.40547216   | 0.534 | 0.48  | 0.008099005 | 10 | Uqcrh         |
| 6.21E-07 | 0.289055242  | 0.729 | 0.682 | 0.008190276 | 10 | Cyba          |
| 6.74E-07 | -0.404271368 | 0.144 | 0.291 | 0.00889513  | 10 | Eef1g         |
| 7.61E-07 | -0.264298358 | 0.209 | 0.394 | 0.010044031 | 10 | Eif2s2        |
| 9.31E-07 | 0.477354685  | 0.377 | 0.29  | 0.012281052 | 10 | Laptm5        |

|            |              |       |       |             |    |               |
|------------|--------------|-------|-------|-------------|----|---------------|
| 9.48E-07   | 0.521573266  | 0.366 | 0.276 | 0.012501723 | 10 | Rap1b         |
| 2.22E-06   | -0.285808955 | 0.182 | 0.345 | 0.029271464 | 10 | Srsf3         |
| 2.69E-06   | -0.272724466 | 0.349 | 0.528 | 0.035503024 | 10 | Snrpg         |
| 2.73E-06   | 0.321992874  | 0.654 | 0.648 | 0.036071441 | 10 | Itm2b         |
| 2.77E-06   | 0.440581503  | 0.466 | 0.4   | 0.036568161 | 10 | Dbi           |
| 4.61E-06   | -0.266326133 | 0.253 | 0.435 | 0.060798362 | 10 | Ndufb7        |
| 6.26E-06   | -0.330479758 | 0.322 | 0.485 | 0.082559954 | 10 | F630028O10Rik |
| 9.78E-06   | 0.367664426  | 0.572 | 0.555 | 0.128984299 | 10 | Calm1         |
| 1.21E-05   | -0.396179091 | 0.154 | 0.285 | 0.159461936 | 10 | Slpi          |
| 1.25E-05   | -0.281707185 | 0.127 | 0.255 | 0.165136679 | 10 | Sec11c        |
| 1.25E-05   | -0.320621968 | 0.342 | 0.491 | 0.165239038 | 10 | Rpl12         |
| 1.45E-05   | 0.518587462  | 0.298 | 0.219 | 0.191507949 | 10 | Gltscr2       |
| 1.55E-05   | 0.511167128  | 0.271 | 0.192 | 0.203979007 | 10 | Emb           |
| 1.65E-05   | -0.346604316 | 0.442 | 0.56  | 0.217691998 | 10 | Rps2          |
| 2.21E-05   | 0.522555031  | 0.312 | 0.238 | 0.29145759  | 10 | Msn           |
| 2.25E-05   | 0.477081784  | 0.267 | 0.186 | 0.297429541 | 10 | Prr13         |
| 2.33E-05   | 0.283341123  | 0.699 | 0.692 | 0.307473684 | 10 | Sh3bgrl3      |
| 3.11E-05   | -0.262807134 | 0.161 | 0.293 | 0.409608043 | 10 | Ndufv3        |
| 3.73E-05   | 0.420789482  | 0.394 | 0.325 | 0.491614791 | 10 | Cd53          |
| 5.13E-05   | 0.326360631  | 0.521 | 0.488 | 0.676303574 | 10 | Arpc2         |
| 5.27E-05   | 0.433404538  | 0.38  | 0.321 | 0.695224208 | 10 | Slc25a5       |
| 5.47E-05   | 0.39472494   | 0.634 | 0.614 | 0.722143939 | 10 | Ly6c2         |
| 6.28E-05   | 0.466548204  | 0.339 | 0.274 | 0.8290116   | 10 | Rac1          |
| 7.08E-05   | 0.574417371  | 0.257 | 0.189 | 0.93365189  | 10 | Chmp4b        |
| 8.54E-05   | 0.379307724  | 0.421 | 0.369 | 1           | 10 | Arpc5         |
| 9.94E-05   | -0.432020432 | 0.38  | 0.482 | 1           | 10 | Lgals1        |
| 0.00012027 | -0.274382972 | 0.366 | 0.512 | 1           | 10 | Rpl22l1       |
| 0.00012974 | 0.494348582  | 0.301 | 0.241 | 1           | 10 | Rap1a         |
| 0.00015431 | 0.559303538  | 0.257 | 0.191 | 1           | 10 | Klf13         |
| 0.00022038 | -0.326125658 | 0.182 | 0.293 | 1           | 10 | Lrrc58        |
| 0.0002478  | 0.346182892  | 0.568 | 0.544 | 1           | 10 | Hspa8         |

|            |              |       |       |   |    |         |
|------------|--------------|-------|-------|---|----|---------|
| 0.00028663 | 0.446501386  | 0.284 | 0.222 | 1 | 10 | Psme2   |
| 0.00030134 | 0.443831737  | 0.26  | 0.197 | 1 | 10 | Hmha1   |
| 0.00033025 | -0.279382271 | 0.161 | 0.268 | 1 | 10 | Ncf1    |
| 0.000387   | 0.254228639  | 0.64  | 0.649 | 1 | 10 | Atp5l   |
| 0.00044378 | 0.43059448   | 0.271 | 0.209 | 1 | 10 | Grn     |
| 0.0004772  | -0.262051903 | 0.579 | 0.666 | 1 | 10 | Rps20   |
| 0.00049074 | 0.365164628  | 0.473 | 0.443 | 1 | 10 | Arpc1b  |
| 0.00064145 | -0.253023524 | 0.562 | 0.648 | 1 | 10 | Rpl36a  |
| 0.00085801 | 0.391211649  | 0.397 | 0.364 | 1 | 10 | Emp3    |
| 0.00105758 | 0.273732805  | 0.565 | 0.574 | 1 | 10 | Rpl36al |
| 0.00120501 | 0.460830231  | 0.274 | 0.223 | 1 | 10 | Ptpn6   |
| 0.00122362 | 0.411069009  | 0.301 | 0.249 | 1 | 10 | Psmb8   |
| 0.00173392 | 0.398886417  | 0.384 | 0.354 | 1 | 10 | Fam49b  |
| 0.00175488 | 0.4013379    | 0.257 | 0.204 | 1 | 10 | Akap13  |
| 0.00187265 | 0.301274319  | 0.469 | 0.45  | 1 | 10 | Naca    |
| 0.00269493 | 0.349151554  | 0.342 | 0.303 | 1 | 10 | Taldo1  |
| 0.00440307 | 0.314467998  | 0.438 | 0.431 | 1 | 10 | Serinc3 |
| 0.00492829 | 0.389509963  | 0.346 | 0.325 | 1 | 10 | Eif3f   |
| 0.00558372 | 0.337921863  | 0.425 | 0.417 | 1 | 10 | Cdc42   |
| 0.00562546 | 0.439363868  | 0.253 | 0.214 | 1 | 10 | Erp29   |
| 0.00629879 | 0.304117296  | 0.418 | 0.403 | 1 | 10 | Pfdn5   |
| 0.00636643 | 0.389755255  | 0.291 | 0.254 | 1 | 10 | Vim     |
| 0.00665193 | 0.40424636   | 0.281 | 0.242 | 1 | 10 | Scand1  |
| 0.00855571 | 0.255092808  | 0.452 | 0.438 | 1 | 10 | Gnb2l1  |

|           |             |       |       |           |    |        |
|-----------|-------------|-------|-------|-----------|----|--------|
| 4.78E-149 | 1.542749756 | 0.549 | 0.076 | 6.30E-145 | 11 | Runx2  |
| 4.07E-137 | 1.50964618  | 0.623 | 0.11  | 5.37E-133 | 11 | Tcf4   |
| 6.04E-115 | 1.387772599 | 0.698 | 0.165 | 7.97E-111 | 11 | Bst2   |
| 2.32E-114 | 1.436825697 | 0.75  | 0.199 | 3.06E-110 | 11 | Irf8   |
| 2.39E-108 | 1.933379136 | 0.56  | 0.115 | 3.15E-104 | 11 | Ly6d   |
| 4.16E-107 | 1.44116729  | 0.425 | 0.061 | 5.49E-103 | 11 | Cox6a2 |
| 2.22E-97  | 1.293728225 | 0.302 | 0.033 | 2.93E-93  | 11 | Cd7    |

plasmacytoid DC

|          |              |       |       |          |            |
|----------|--------------|-------|-------|----------|------------|
| 7.34E-81 | 1.222550367  | 0.881 | 0.46  | 9.68E-77 | 11 Lgals1  |
| 6.91E-80 | 1.010168928  | 0.354 | 0.054 | 9.12E-76 | 11 Siglech |
| 6.04E-71 | 1.267315868  | 0.504 | 0.13  | 7.97E-67 | 11 Bcl11a  |
| 6.09E-41 | -1.156617934 | 0.754 | 0.912 | 8.03E-37 | 11 Lyz2    |
| 5.16E-36 | 0.908791276  | 0.362 | 0.111 | 6.81E-32 | 11 Mef2c   |
| 1.74E-33 | 0.718142734  | 0.78  | 0.492 | 2.29E-29 | 11 Mbnl1   |
| 2.36E-33 | 0.862323721  | 0.373 | 0.124 | 3.11E-29 | 11 Dnajc7  |
| 1.56E-32 | 0.938059042  | 0.515 | 0.233 | 2.06E-28 | 11 Pgl3    |
| 4.69E-31 | -0.420905852 | 1     | 0.996 | 6.18E-27 | 11 Tmsb4x  |
| 7.35E-31 | 0.685172243  | 0.836 | 0.628 | 9.70E-27 | 11 Xist    |
| 4.36E-30 | 1.000181469  | 0.31  | 0.098 | 5.75E-26 | 11 Bmp2k   |
| 5.50E-29 | 0.707669812  | 0.325 | 0.102 | 7.26E-25 | 11 Rnase6  |
| 2.29E-27 | 0.318160985  | 0.996 | 0.978 | 3.02E-23 | 11 mt-Co1  |
| 4.09E-26 | 0.392359193  | 0.974 | 0.854 | 5.39E-22 | 11 mt-Atp6 |
| 1.19E-24 | 0.520276507  | 0.847 | 0.634 | 1.57E-20 | 11 Fth1    |
| 4.61E-24 | -1.150184296 | 0.265 | 0.565 | 6.08E-20 | 11 Chil3   |
| 2.13E-23 | 0.69366982   | 0.474 | 0.219 | 2.81E-19 | 11 Sell    |
| 3.80E-23 | 0.702898323  | 0.582 | 0.335 | 5.02E-19 | 11 H2afy   |
| 3.42E-22 | 0.457144818  | 0.907 | 0.7   | 4.51E-18 | 11 Rpl31   |
| 4.29E-22 | 0.589202491  | 0.716 | 0.458 | 5.66E-18 | 11 Ly6e    |
| 4.86E-21 | 0.303686852  | 1     | 0.997 | 6.41E-17 | 11 Malat1  |
| 3.67E-20 | 0.380568629  | 0.903 | 0.674 | 4.84E-16 | 11 Plac8   |
| 6.05E-20 | 0.681836246  | 0.429 | 0.211 | 7.98E-16 | 11 Selplg  |
| 5.73E-19 | 0.766298085  | 0.373 | 0.174 | 7.56E-15 | 11 Kctd12  |
| 9.02E-19 | 0.553723854  | 0.41  | 0.186 | 1.19E-14 | 11 Mpeg1   |
| 2.80E-17 | -0.652522655 | 0.422 | 0.655 | 3.69E-13 | 11 Prdx5   |
| 2.94E-17 | -1.090569554 | 0.996 | 0.999 | 3.88E-13 | 11 S100a8  |
| 5.31E-17 | 0.455868791  | 0.851 | 0.737 | 7.01E-13 | 11 H3f3b   |
| 5.47E-17 | -0.997459937 | 0.328 | 0.569 | 7.21E-13 | 11 Ifitm3  |
| 9.90E-17 | 0.266345581  | 0.989 | 0.953 | 1.31E-12 | 11 mt-Co3  |
| 1.76E-16 | 0.694442297  | 0.269 | 0.111 | 2.33E-12 | 11 Hmgn1   |



|          |              |       |       |          |                  |
|----------|--------------|-------|-------|----------|------------------|
| 3.93E-16 | 0.66400517   | 0.254 | 0.101 | 5.18E-12 | 11 Marcks        |
| 2.18E-15 | -0.574865514 | 0.493 | 0.692 | 2.87E-11 | 11 Cyba          |
| 3.87E-15 | 0.351386544  | 0.944 | 0.803 | 5.10E-11 | 11 Rpl13a        |
| 1.06E-14 | 0.538256472  | 0.526 | 0.307 | 1.39E-10 | 11 Lsp1          |
| 1.14E-14 | -0.833903483 | 0.194 | 0.439 | 1.50E-10 | 11 Anxa1         |
| 1.42E-14 | 0.759288569  | 0.254 | 0.11  | 1.88E-10 | 11 Rexo2         |
| 2.09E-14 | 0.315731315  | 0.948 | 0.788 | 2.75E-10 | 11 Rps11         |
| 2.93E-14 | -0.950924072 | 0.243 | 0.456 | 3.87E-10 | 11 Pglyrp1       |
| 4.12E-14 | 0.371860762  | 0.757 | 0.534 | 5.44E-10 | 11 Psap          |
| 4.28E-14 | -0.746007109 | 0.179 | 0.406 | 5.64E-10 | 11 Dstn          |
| 6.77E-14 | -1.115767435 | 0.47  | 0.637 | 8.93E-10 | 11 Wfdc21        |
| 1.20E-13 | 0.362877022  | 0.888 | 0.687 | 1.58E-09 | 11 Rpl10         |
| 1.20E-13 | -1.039780589 | 0.157 | 0.369 | 1.58E-09 | 11 Ifitm6        |
| 1.96E-13 | -0.594157038 | 0.604 | 0.736 | 2.59E-09 | 11 Cd52          |
| 2.92E-13 | 0.527293382  | 0.388 | 0.204 | 3.85E-09 | 11 Ctsb          |
| 4.86E-13 | -0.810814764 | 0.157 | 0.373 | 6.42E-09 | 11 Lst1          |
| 9.47E-13 | 0.316258324  | 0.937 | 0.838 | 1.25E-08 | 11 Ptma          |
| 1.13E-12 | 0.324760015  | 0.922 | 0.787 | 1.49E-08 | 11 Ppia          |
| 1.49E-12 | 0.612462087  | 0.302 | 0.144 | 1.97E-08 | 11 Trim30a       |
| 2.31E-12 | 0.361803145  | 0.832 | 0.691 | 3.05E-08 | 11 Oaz1          |
| 3.18E-12 | -0.671595988 | 0.284 | 0.486 | 4.20E-08 | 11 F630028O10Rik |
| 5.44E-12 | 0.481183487  | 0.254 | 0.113 | 7.18E-08 | 11 Ly86          |
| 6.06E-12 | -1.041080002 | 0.407 | 0.565 | 7.99E-08 | 11 Lcn2          |
| 7.49E-12 | -0.664763023 | 0.257 | 0.463 | 9.88E-08 | 11 Hp            |
| 1.29E-11 | -1.016086653 | 0.772 | 0.853 | 1.70E-07 | 11 Ngp           |
| 1.37E-11 | -0.700617612 | 0.172 | 0.374 | 1.80E-07 | 11 Gsr           |
| 1.58E-11 | 0.323476762  | 0.866 | 0.719 | 2.08E-07 | 11 Rps4x         |
| 2.38E-11 | 0.60435346   | 0.541 | 0.407 | 3.14E-07 | 11 Stmn1         |
| 2.43E-11 | -1.051574192 | 0.918 | 0.932 | 3.20E-07 | 11 Camp          |
| 3.44E-11 | 0.424011286  | 0.802 | 0.686 | 4.54E-07 | 11 Hmgb1         |
| 3.89E-11 | -1.056743318 | 1     | 0.994 | 5.13E-07 | 11 S100a9        |

|          |              |       |       |             |              |
|----------|--------------|-------|-------|-------------|--------------|
| 4.08E-11 | 0.315230757  | 0.836 | 0.698 | 5.39E-07    | 11 mt-Cytb   |
| 5.14E-11 | 0.391912064  | 0.269 | 0.126 | 6.79E-07    | 11 Ifi203    |
| 6.21E-11 | 0.266079843  | 0.94  | 0.778 | 8.19E-07    | 11 Rps5      |
| 6.70E-11 | 0.581635936  | 0.366 | 0.214 | 8.84E-07    | 11 Fgfr1op2  |
| 3.87E-10 | -0.748896737 | 0.175 | 0.347 | 5.11E-06    | 11 Ifitm2    |
| 6.65E-10 | 0.375275648  | 0.593 | 0.424 | 8.77E-06    | 11 Serinc3   |
| 1.46E-09 | -0.443609181 | 0.534 | 0.671 | 1.92E-05    | 11 Arhgdib   |
| 1.48E-09 | 0.487054223  | 0.287 | 0.153 | 1.96E-05    | 11 St8sia4   |
| 2.09E-09 | 0.388044591  | 0.362 | 0.206 | 2.76E-05    | 11 Ahnak     |
| 2.15E-09 | 0.507654188  | 0.336 | 0.198 | 2.84E-05    | 11 Zfp706    |
| 2.48E-09 | 0.52840221   | 0.28  | 0.151 | 3.28E-05    | 11 Ctsh      |
| 5.67E-09 | -0.671947573 | 0.287 | 0.445 | 7.47E-05    | 11 Lgals3    |
| 9.63E-09 | -0.605546076 | 0.194 | 0.36  | 0.000127079 | 11 Msrb1     |
| 1.36E-08 | 0.410917726  | 0.597 | 0.461 | 0.000179854 | 11 Cd47      |
| 2.17E-08 | 0.392057341  | 0.489 | 0.334 | 0.000286833 | 11 Hsp90b1   |
| 2.32E-08 | -0.549800957 | 0.362 | 0.507 | 0.000305802 | 11 Cybb      |
| 2.85E-08 | 0.316544768  | 0.817 | 0.701 | 0.000375345 | 11 Sub1      |
| 3.09E-08 | 0.263039336  | 0.877 | 0.768 | 0.000406973 | 11 Rps3a1    |
| 4.45E-08 | -0.643662104 | 0.149 | 0.297 | 0.00058666  | 11 Mgst1     |
| 4.45E-08 | -0.855918899 | 0.437 | 0.546 | 0.000586844 | 11 Ltf       |
| 9.04E-08 | 0.509867552  | 0.276 | 0.158 | 0.001192683 | 11 Sepw1     |
| 1.07E-07 | -0.566021217 | 0.187 | 0.333 | 0.001417653 | 11 Ap3s1     |
| 1.15E-07 | 0.456187398  | 0.403 | 0.273 | 0.001517625 | 11 Atp6v1g1  |
| 1.25E-07 | 0.33595548   | 0.612 | 0.461 | 0.001649379 | 11 Rpl10-ps3 |
| 1.38E-07 | -0.64972393  | 0.123 | 0.263 | 0.001816266 | 11 Cebpb     |
| 1.41E-07 | 0.285975085  | 0.754 | 0.627 | 0.001855231 | 11 Cst3      |
| 1.80E-07 | 0.371779364  | 0.597 | 0.451 | 0.002380632 | 11 Dynll1    |
| 2.60E-07 | -0.307112255 | 0.698 | 0.784 | 0.003426878 | 11 Shfm1     |
| 3.05E-07 | 0.308535475  | 0.515 | 0.359 | 0.004017048 | 11 Emp3      |
| 3.60E-07 | 0.432485008  | 0.254 | 0.144 | 0.004743685 | 11 Psmb9     |
| 3.60E-07 | 0.439760265  | 0.254 | 0.145 | 0.004753848 | 11 Cd48      |

|          |              |       |       |             |                  |
|----------|--------------|-------|-------|-------------|------------------|
| 5.44E-07 | 0.272786449  | 0.709 | 0.564 | 0.007178258 | 11 mt-Nd4        |
| 8.40E-07 | 0.34073301   | 0.5   | 0.371 | 0.011077813 | 11 Btf3          |
| 8.51E-07 | 0.267197725  | 0.739 | 0.594 | 0.01122005  | 11 Rpl3          |
| 8.71E-07 | 0.369686183  | 0.466 | 0.336 | 0.011488888 | 11 Set           |
| 1.20E-06 | 0.338247536  | 0.284 | 0.164 | 0.015777283 | 11 Pld4          |
| 1.46E-06 | 0.290043213  | 0.743 | 0.633 | 0.019235005 | 11 Sec61g        |
| 1.93E-06 | -0.543756009 | 0.153 | 0.28  | 0.025411262 | 11 Aldh2         |
| 2.25E-06 | 0.320945772  | 0.343 | 0.219 | 0.029737841 | 11 Psme2         |
| 2.61E-06 | -0.510420371 | 0.142 | 0.271 | 0.03444961  | 11 Clec4a2       |
| 2.77E-06 | 0.471744649  | 0.31  | 0.206 | 0.036587765 | 11 Bzw1          |
| 2.84E-06 | 0.394791551  | 0.31  | 0.201 | 0.037509742 | 11 Tacc1         |
| 3.06E-06 | 0.301975076  | 0.619 | 0.503 | 0.040328994 | 11 Cbx3          |
| 3.76E-06 | 0.421797828  | 0.265 | 0.163 | 0.049608618 | 11 Clk1          |
| 4.43E-06 | -0.481324195 | 0.172 | 0.302 | 0.058490583 | 11 Cd24a         |
| 5.09E-06 | 0.429802803  | 0.463 | 0.372 | 0.067117865 | 11 H2afv         |
| 5.23E-06 | 0.32257268   | 0.31  | 0.197 | 0.068960541 | 11 Psme1         |
| 5.30E-06 | -1.111405223 | 0.138 | 0.252 | 0.069922221 | 11 Elane         |
| 5.47E-06 | 0.418649697  | 0.287 | 0.184 | 0.072122292 | 11 Ramp1         |
| 5.87E-06 | 0.469772574  | 0.332 | 0.216 | 0.077484449 | 11 Gm2a          |
| 6.88E-06 | 0.309487898  | 0.507 | 0.385 | 0.090813483 | 11 Smdt1         |
| 9.08E-06 | 0.34099728   | 0.41  | 0.3   | 0.119739792 | 11 Tsix          |
| 1.00E-05 | -0.406277671 | 0.485 | 0.586 | 0.132427649 | 11 S100a11       |
| 1.20E-05 | 0.264942026  | 0.586 | 0.465 | 0.158168005 | 11 Rps18-ps3     |
| 1.48E-05 | 0.369103832  | 0.299 | 0.201 | 0.194973179 | 11 Nono          |
| 1.48E-05 | 0.48069102   | 0.563 | 0.494 | 0.195228336 | 11 Tubb5         |
| 1.52E-05 | 0.268253107  | 0.586 | 0.464 | 0.201162272 | 11 Gm8730        |
| 1.54E-05 | -0.446580254 | 0.183 | 0.297 | 0.20275494  | 11 Pkm           |
| 1.57E-05 | -0.519901091 | 0.16  | 0.271 | 0.206832404 | 11 Cotl1         |
| 1.57E-05 | -0.395382232 | 0.257 | 0.39  | 0.207447417 | 11 1810037117Rik |
| 1.61E-05 | 0.376234816  | 0.306 | 0.206 | 0.21230529  | 11 Tram1         |
| 2.04E-05 | 0.341598697  | 0.369 | 0.259 | 0.269229956 | 11 Gnas          |

|            |              |       |       |             |            |
|------------|--------------|-------|-------|-------------|------------|
| 2.11E-05   | 0.396525375  | 0.388 | 0.283 | 0.2781623   | 11 Tagln2  |
| 2.80E-05   | 0.366298817  | 0.28  | 0.183 | 0.368967536 | 11 Pnlsr   |
| 2.81E-05   | 0.437128275  | 0.272 | 0.18  | 0.371184033 | 11 Erdr1   |
| 4.74E-05   | 0.254657297  | 0.571 | 0.474 | 0.625518053 | 11 Morf4l1 |
| 4.79E-05   | 0.310449668  | 0.31  | 0.207 | 0.632459846 | 11 Grn     |
| 4.90E-05   | -0.44299193  | 0.153 | 0.26  | 0.646359693 | 11 Flna    |
| 4.99E-05   | -0.522032502 | 0.194 | 0.298 | 0.658398161 | 11 Sat1    |
| 6.09E-05   | -0.333518652 | 0.366 | 0.474 | 0.802728522 | 11 Txn1    |
| 6.46E-05   | -0.385247738 | 0.164 | 0.275 | 0.851762513 | 11 Aldoa   |
| 6.64E-05   | 0.412398139  | 0.254 | 0.166 | 0.875522498 | 11 Cd164   |
| 6.79E-05   | 0.298497125  | 0.347 | 0.244 | 0.896079837 | 11 Rbm25   |
| 7.56E-05   | 0.299219988  | 0.317 | 0.22  | 0.996671162 | 11 Rpgrip1 |
| 8.14E-05   | 0.332970791  | 0.369 | 0.273 | 1           | 11 Arglu1  |
| 8.49E-05   | 0.386466204  | 0.254 | 0.167 | 1           | 11 Tmed3   |
| 8.81E-05   | -0.910874987 | 0.183 | 0.274 | 1           | 11 Mpo     |
| 0.00011898 | 0.332338931  | 0.358 | 0.265 | 1           | 11 Tmed2   |
| 0.0001198  | 0.330782918  | 0.313 | 0.215 | 1           | 11 Smim14  |
| 0.00014078 | -0.41397125  | 0.164 | 0.263 | 1           | 11 Aprt    |
| 0.00015683 | -0.78670611  | 0.187 | 0.276 | 1           | 11 Prtn3   |
| 0.00016841 | 0.3406008    | 0.351 | 0.259 | 1           | 11 Snrpd2  |
| 0.00017381 | 0.326269902  | 0.373 | 0.28  | 1           | 11 Luc7l2  |
| 0.00017656 | 0.314684922  | 0.429 | 0.332 | 1           | 11 Nucks1  |
| 0.00018711 | -0.35993173  | 0.358 | 0.449 | 1           | 11 Gmfg    |
| 0.0001954  | -0.397720585 | 0.175 | 0.273 | 1           | 11 Gpi1    |
| 0.00021049 | 0.332003489  | 0.414 | 0.321 | 1           | 11 Ranbp1  |
| 0.00022675 | 0.355380417  | 0.444 | 0.365 | 1           | 11 Dek     |
| 0.00026395 | -0.337381358 | 0.216 | 0.323 | 1           | 11 Gm10116 |
| 0.00028637 | 0.314612989  | 0.422 | 0.329 | 1           | 11 Irf2bp2 |
| 0.00028745 | 0.35906498   | 0.366 | 0.28  | 1           | 11 Cmtm7   |
| 0.00031297 | 0.291175689  | 0.358 | 0.269 | 1           | 11 Ywhae   |
| 0.00031893 | 0.276454107  | 0.254 | 0.168 | 1           | 11 Sp100   |

|            |              |       |       |           |                  |
|------------|--------------|-------|-------|-----------|------------------|
| 0.00039291 | -0.412181533 | 0.172 | 0.261 | 1         | 11 Gm10282       |
| 0.000399   | 0.508005529  | 0.396 | 0.331 | 1         | 11 2810417H13Rik |
| 0.0003995  | 0.302343913  | 0.269 | 0.189 | 1         | 11 Hnrnpl        |
| 0.00046596 | -0.32150437  | 0.302 | 0.407 | 1         | 11 Dbi           |
| 0.00050217 | 0.293299946  | 0.31  | 0.226 | 1         | 11 Csnk1a1       |
| 0.00056176 | 0.319137991  | 0.265 | 0.189 | 1         | 11 Chmp4b        |
| 0.00064727 | -0.256040005 | 0.321 | 0.428 | 1         | 11 Tkt           |
| 0.00069151 | 0.330942263  | 0.261 | 0.184 | 1         | 11 Fkbp2         |
| 0.00101941 | 0.286042178  | 0.291 | 0.213 | 1         | 11 Erp29         |
| 0.00103094 | 0.332385641  | 0.325 | 0.248 | 1         | 11 Psmb8         |
| 0.00106019 | -0.359464088 | 0.526 | 0.59  | 1         | 11 Hmgn2         |
| 0.00114803 | 0.29891901   | 0.373 | 0.299 | 1         | 11 Erh           |
| 0.00119878 | 0.352233196  | 0.31  | 0.236 | 1         | 11 Cks1b         |
| 0.00185563 | 0.398936781  | 0.388 | 0.316 | 1         | 11 Top2a         |
| 0.00188561 | 0.254666686  | 0.328 | 0.251 | 1         | 11 Btg1          |
| 0.00197644 | -0.391064455 | 0.175 | 0.253 | 1         | 11 Tmcc1         |
| 0.00204134 | 0.294604306  | 0.295 | 0.222 | 1         | 11 Lsm4          |
| 0.00213801 | 0.282636873  | 0.418 | 0.354 | 1         | 11 Gm42418       |
| 0.00222751 | -0.321709286 | 0.179 | 0.261 | 1         | 11 Lmo4          |
| 0.00225359 | 0.263755595  | 0.28  | 0.208 | 1         | 11 Fus           |
| 0.00455531 | 0.622177659  | 0.422 | 0.383 | 1         | 11 Hist1h2ap     |
| 0.00532494 | 0.253716717  | 0.388 | 0.318 | 1         | 11 Hnrnpu        |
| 0.00597122 | 0.26074753   | 0.261 | 0.197 | 1         | 11 Ppp3ca        |
| 0.00609923 | -0.282511044 | 0.291 | 0.362 | 1         | 11 Gpx4          |
| 0.00660094 | 0.265720693  | 0.302 | 0.244 | 1         | 11 Hnrnph1       |
| 0.006946   | 0.278212573  | 0.302 | 0.237 | 1         | 11 Pycard        |
| 0.00730491 | 0.251794077  | 0.261 | 0.203 | 1         | 11 Rasgrp2       |
| 0.00731161 | 0.251962408  | 0.332 | 0.267 | 1         | 11 Abracl        |
| 0.00749488 | 0.271550086  | 0.257 | 0.196 | 1         | 11 Al662270      |
| 0.00821235 | -0.333115176 | 0.205 | 0.277 | 1         | 11 Ccr2          |
| 3.00E-219  | 1.491967393  | 0.851 | 0.125 | 3.96E-215 | 12 Ctsg          |

Mac

|           |              |       |       |           |    |           |
|-----------|--------------|-------|-------|-----------|----|-----------|
| 6.72E-197 | 1.77570706   | 0.977 | 0.24  | 8.86E-193 | 12 | Mpo       |
| 1.87E-180 | 1.550359175  | 0.969 | 0.243 | 2.46E-176 | 12 | Prtn3     |
| 1.52E-170 | 1.532645678  | 0.927 | 0.218 | 2.01E-166 | 12 | Elane     |
| 5.01E-159 | 1.338895346  | 0.9   | 0.204 | 6.61E-155 | 12 | Mif       |
| 6.87E-99  | 0.828477808  | 1     | 0.829 | 9.06E-95  | 12 | Rps8      |
| 7.56E-97  | 0.988845431  | 0.812 | 0.22  | 9.97E-93  | 12 | Calr      |
| 2.87E-96  | 0.719896982  | 0.479 | 0.077 | 3.79E-92  | 12 | Igfbp4    |
| 4.73E-96  | 0.854504589  | 0.659 | 0.141 | 6.24E-92  | 12 | Ms4a3     |
| 7.54E-87  | 0.632074861  | 1     | 0.954 | 9.94E-83  | 12 | Rpl41     |
| 1.94E-85  | 0.82802024   | 0.755 | 0.199 | 2.56E-81  | 12 | Etfb      |
| 7.01E-85  | 0.822354441  | 0.778 | 0.206 | 9.25E-81  | 12 | Hspe1     |
| 2.11E-83  | 0.54330433   | 1     | 0.975 | 2.79E-79  | 12 | Rps29     |
| 5.77E-81  | 0.811026491  | 0.996 | 0.645 | 7.61E-77  | 12 | Rps12     |
| 9.98E-80  | 0.589520974  | 0.54  | 0.109 | 1.32E-75  | 12 | Dctpp1    |
| 1.96E-77  | 0.60771937   | 1     | 0.897 | 2.59E-73  | 12 | Rps28     |
| 6.60E-75  | 0.780808352  | 0.992 | 0.629 | 8.70E-71  | 12 | Rpl36a    |
| 4.78E-74  | 0.838291197  | 0.966 | 0.436 | 6.31E-70  | 12 | Rps12-ps3 |
| 2.19E-73  | 0.734161981  | 1     | 0.709 | 2.89E-69  | 12 | Rps17     |
| 3.95E-72  | 0.85401621   | 0.923 | 0.36  | 5.20E-68  | 12 | Npm1      |
| 9.53E-71  | 0.76329113   | 0.874 | 0.291 | 1.26E-66  | 12 | Atp5g1    |
| 1.30E-70  | 0.741433506  | 0.674 | 0.181 | 1.71E-66  | 12 | Srgn      |
| 1.97E-70  | 0.767673306  | 0.996 | 0.536 | 2.60E-66  | 12 | Rps2      |
| 5.34E-70  | 0.591102358  | 1     | 0.898 | 7.05E-66  | 12 | Rpl37     |
| 8.10E-69  | 0.726234345  | 0.774 | 0.233 | 1.07E-64  | 12 | Ncl       |
| 1.93E-68  | 0.693122997  | 0.996 | 0.711 | 2.55E-64  | 12 | Rplp1     |
| 4.19E-68  | 0.693558892  | 1     | 0.672 | 5.52E-64  | 12 | Rpl14     |
| 1.36E-67  | 0.68845052   | 1     | 0.755 | 1.79E-63  | 12 | Rpl36     |
| 1.38E-67  | 0.620708192  | 1     | 0.843 | 1.82E-63  | 12 | Rpl38     |
| 1.55E-67  | 0.782799454  | 0.816 | 0.272 | 2.05E-63  | 12 | Pdcd4     |
| 4.58E-67  | 0.609524659  | 1     | 0.852 | 6.04E-63  | 12 | Rpl35     |
| 9.18E-67  | -0.742497212 | 1     | 0.996 | 1.21E-62  | 12 | Tmsb4x    |

|          |             |       |       |          |    |          |
|----------|-------------|-------|-------|----------|----|----------|
| 1.29E-66 | 0.663601561 | 0.996 | 0.743 | 1.71E-62 | 12 | Gm10076  |
| 1.32E-66 | 0.601238821 | 0.494 | 0.108 | 1.74E-62 | 12 | Pebp1    |
| 3.18E-66 | 0.70034865  | 0.996 | 0.648 | 4.20E-62 | 12 | Rps20    |
| 1.12E-65 | 0.624251289 | 0.575 | 0.14  | 1.47E-61 | 12 | Rpn1     |
| 1.23E-65 | 0.631097099 | 0.322 | 0.052 | 1.63E-61 | 12 | Dennd5b  |
| 1.32E-65 | 0.647335494 | 0.67  | 0.184 | 1.74E-61 | 12 | Ssr4     |
| 3.00E-65 | 0.577583571 | 0.437 | 0.089 | 3.96E-61 | 12 | Hspa9    |
| 4.83E-65 | 0.757172136 | 0.973 | 0.464 | 6.37E-61 | 12 | Rpl12    |
| 7.81E-65 | 0.572784146 | 0.536 | 0.125 | 1.03E-60 | 12 | Npm3     |
| 8.60E-65 | 0.535764957 | 0.28  | 0.04  | 1.14E-60 | 12 | Cst7     |
| 1.31E-64 | 0.70961102  | 0.996 | 0.671 | 1.72E-60 | 12 | Plac8    |
| 1.63E-64 | 0.640960289 | 0.996 | 0.803 | 2.15E-60 | 12 | Rps23    |
| 1.88E-64 | 0.599918422 | 1     | 0.862 | 2.48E-60 | 12 | Rpl32    |
| 2.17E-64 | 0.601775022 | 1     | 0.836 | 2.86E-60 | 12 | Ptma     |
| 3.32E-64 | 0.532819576 | 0.46  | 0.096 | 4.38E-60 | 12 | Hspd1    |
| 4.05E-64 | 0.67947472  | 0.483 | 0.108 | 5.34E-60 | 12 | Gstm1    |
| 4.58E-64 | 0.767693179 | 0.927 | 0.397 | 6.04E-60 | 12 | Hsp90ab1 |
| 4.68E-64 | 0.567647016 | 0.429 | 0.087 | 6.18E-60 | 12 | Nop56    |
| 1.18E-63 | 0.627888661 | 1     | 0.769 | 1.56E-59 | 12 | Rplp2    |
| 1.43E-63 | 0.485612555 | 0.299 | 0.046 | 1.89E-59 | 12 | Cd93     |
| 2.09E-63 | 0.641883946 | 0.713 | 0.206 | 2.75E-59 | 12 | Nme1     |
| 3.22E-63 | 0.658095181 | 0.82  | 0.261 | 4.25E-59 | 12 | Cmtm7    |
| 3.40E-63 | 0.558177086 | 0.429 | 0.087 | 4.48E-59 | 12 | Pdia4    |
| 3.60E-63 | 0.719066787 | 0.996 | 0.592 | 4.75E-59 | 12 | Rps21    |
| 1.97E-62 | 0.573979575 | 0.571 | 0.141 | 2.59E-58 | 12 | Sdf2l1   |
| 3.27E-62 | 0.704102266 | 0.877 | 0.314 | 4.31E-58 | 12 | Nop10    |
| 3.48E-62 | 0.585924272 | 0.67  | 0.185 | 4.59E-58 | 12 | Hspa5    |
| 6.50E-62 | 0.70052501  | 0.785 | 0.256 | 8.58E-58 | 12 | Bola2    |
| 9.22E-62 | 0.428561846 | 0.31  | 0.05  | 1.22E-57 | 12 | Phpt1    |
| 9.56E-62 | 0.630558355 | 0.517 | 0.124 | 1.26E-57 | 12 | Snhg9    |
| 3.72E-61 | 0.54155163  | 1     | 0.892 | 4.91E-57 | 12 | Rps19    |

|          |              |       |       |          |            |
|----------|--------------|-------|-------|----------|------------|
| 5.16E-61 | 0.435636662  | 0.276 | 0.041 | 6.81E-57 | 12 Phgdh   |
| 5.35E-61 | 0.62483578   | 1     | 0.767 | 7.05E-57 | 12 Rpl39   |
| 8.72E-61 | 0.69544455   | 0.46  | 0.104 | 1.15E-56 | 12 Mt1     |
| 8.82E-61 | 0.653386452  | 1     | 0.712 | 1.16E-56 | 12 Rps26   |
| 2.09E-60 | 0.644355702  | 0.536 | 0.133 | 2.76E-56 | 12 Nhp2    |
| 2.10E-60 | 0.58277939   | 1     | 0.829 | 2.78E-56 | 12 Rps18   |
| 3.56E-60 | 0.453409955  | 0.467 | 0.102 | 4.70E-56 | 12 Pdia6   |
| 4.44E-60 | 0.636281648  | 0.716 | 0.214 | 5.86E-56 | 12 Usp50   |
| 4.98E-60 | -1.727604368 | 0.939 | 0.904 | 6.57E-56 | 12 Lyz2    |
| 9.49E-60 | 0.536211553  | 1     | 0.867 | 1.25E-55 | 12 Rpl35a  |
| 2.53E-59 | 0.515443094  | 0.406 | 0.084 | 3.33E-55 | 12 Pa2g4   |
| 1.16E-58 | 0.585235077  | 0.567 | 0.148 | 1.53E-54 | 12 G3bp1   |
| 1.58E-58 | 0.533698108  | 0.705 | 0.204 | 2.09E-54 | 12 Krtcap2 |
| 6.92E-58 | 0.535906047  | 1     | 0.872 | 9.12E-54 | 12 Rps27a  |
| 1.39E-57 | 0.563364673  | 1     | 0.811 | 1.83E-53 | 12 Rpl23a  |
| 2.47E-57 | 0.615571101  | 1     | 0.73  | 3.26E-53 | 12 Rpl23   |
| 4.00E-57 | 0.670349007  | 0.82  | 0.291 | 5.27E-53 | 12 Cycs    |
| 5.13E-57 | 0.457049955  | 0.579 | 0.148 | 6.77E-53 | 12 P4hb    |
| 8.77E-57 | 0.741098836  | 0.946 | 0.487 | 1.16E-52 | 12 Rpl22l1 |
| 2.08E-56 | 0.597172938  | 0.805 | 0.262 | 2.74E-52 | 12 Eef1g   |
| 3.57E-56 | 0.578074598  | 1     | 0.763 | 4.72E-52 | 12 Rps3a1  |
| 3.90E-56 | 0.68515955   | 0.874 | 0.335 | 5.14E-52 | 12 Snrpf   |
| 4.19E-56 | 0.663443253  | 0.977 | 0.574 | 5.53E-52 | 12 Wdr89   |
| 4.77E-56 | 0.617572897  | 0.586 | 0.164 | 6.29E-52 | 12 Myb     |
| 5.18E-56 | 0.512243475  | 0.621 | 0.17  | 6.83E-52 | 12 Ramp1   |
| 5.22E-56 | 0.492039331  | 0.579 | 0.152 | 6.88E-52 | 12 Slirp   |
| 9.72E-56 | 0.617122495  | 1     | 0.661 | 1.28E-51 | 12 Gm2000  |
| 1.90E-55 | 0.65813303   | 0.977 | 0.559 | 2.51E-51 | 12 Rpl10a  |
| 2.26E-55 | 0.459741791  | 0.341 | 0.065 | 2.98E-51 | 12 Cct3    |
| 2.56E-55 | 0.651372259  | 0.858 | 0.324 | 3.38E-51 | 12 H2afy   |
| 5.27E-55 | 0.5896393    | 1     | 0.737 | 6.95E-51 | 12 Rps6    |



|          |             |       |       |          |    |            |
|----------|-------------|-------|-------|----------|----|------------|
| 5.68E-55 | 0.665515138 | 0.962 | 0.418 | 7.49E-51 | 12 | Gm10073    |
| 1.22E-54 | 0.659458311 | 0.862 | 0.32  | 1.61E-50 | 12 | Set        |
| 2.02E-54 | 0.702468306 | 0.897 | 0.383 | 2.66E-50 | 12 | Rpl36-ps3  |
| 2.18E-54 | 0.555746649 | 0.525 | 0.138 | 2.87E-50 | 12 | Nkg7       |
| 1.09E-53 | 0.612055661 | 0.996 | 0.667 | 1.43E-49 | 12 | Rpl27      |
| 1.34E-53 | 0.588993315 | 1     | 0.716 | 1.77E-49 | 12 | Rps25      |
| 6.56E-53 | 0.469266416 | 1     | 0.936 | 8.65E-49 | 12 | Rpl37a     |
| 7.53E-53 | 0.572371695 | 0.299 | 0.055 | 9.93E-49 | 12 | Srm        |
| 1.19E-52 | 0.681276357 | 0.808 | 0.304 | 1.57E-48 | 12 | Ranbp1     |
| 1.84E-52 | 0.580235487 | 1     | 0.71  | 2.42E-48 | 12 | Rpl6       |
| 2.07E-52 | 0.614870159 | 0.797 | 0.281 | 2.73E-48 | 12 | Erh        |
| 3.96E-52 | 0.446028551 | 0.284 | 0.049 | 5.23E-48 | 12 | Pcyox1l    |
| 5.11E-52 | 0.558674238 | 1     | 0.738 | 6.74E-48 | 12 | Rps15a     |
| 5.15E-52 | 0.695737444 | 0.797 | 0.306 | 6.80E-48 | 12 | Hsp90aa1   |
| 7.72E-52 | 0.553048385 | 0.996 | 0.771 | 1.02E-47 | 12 | Rpl26      |
| 9.36E-52 | 0.445776165 | 0.291 | 0.051 | 1.24E-47 | 12 | BC035044   |
| 9.74E-52 | 0.611901635 | 0.774 | 0.266 | 1.29E-47 | 12 | Eif4a1     |
| 1.52E-51 | 0.593901931 | 0.981 | 0.658 | 2.00E-47 | 12 | Rpl23a-ps3 |
| 1.76E-51 | 0.500402531 | 0.513 | 0.135 | 2.32E-47 | 12 | Manf       |
| 1.81E-51 | 0.450021926 | 0.533 | 0.142 | 2.39E-47 | 12 | Cdk6       |
| 2.64E-51 | 0.4786681   | 0.318 | 0.061 | 3.48E-47 | 12 | Alas1      |
| 1.05E-50 | 0.575871138 | 1     | 0.709 | 1.39E-46 | 12 | Rpl27a     |
| 1.98E-50 | 0.553123926 | 0.774 | 0.263 | 2.61E-46 | 12 | Gm10269    |
| 2.02E-50 | 0.65817641  | 0.954 | 0.455 | 2.66E-46 | 12 | Rps26-ps1  |
| 2.25E-50 | 0.600034745 | 0.996 | 0.632 | 2.97E-46 | 12 | Gm10263    |
| 3.04E-50 | 0.527160467 | 0.521 | 0.141 | 4.01E-46 | 12 | Ndufa12    |
| 4.60E-50 | 0.50759785  | 0.437 | 0.107 | 6.06E-46 | 12 | Gm10053    |
| 4.70E-50 | 0.515335004 | 0.563 | 0.159 | 6.20E-46 | 12 | Uqcc2      |
| 9.30E-50 | 0.584418759 | 0.992 | 0.705 | 1.23E-45 | 12 | Rpl11      |
| 1.24E-49 | 0.62508491  | 0.981 | 0.507 | 1.63E-45 | 12 | Rpl22      |
| 1.78E-49 | 0.642062226 | 0.885 | 0.371 | 2.35E-45 | 12 | Gm8186     |

|          |             |       |       |          |    |               |
|----------|-------------|-------|-------|----------|----|---------------|
| 2.64E-49 | 0.655482034 | 0.954 | 0.502 | 3.48E-45 | 12 | Snrpg         |
| 2.77E-49 | 0.478851408 | 0.544 | 0.15  | 3.65E-45 | 12 | Tomm5         |
| 3.15E-49 | 0.434691947 | 0.303 | 0.058 | 4.15E-45 | 12 | Fam162a       |
| 5.79E-49 | 0.485859657 | 0.345 | 0.073 | 7.64E-45 | 12 | Lyar          |
| 8.24E-49 | 0.442901953 | 0.521 | 0.139 | 1.09E-44 | 12 | 1110001J03Rik |
| 1.00E-48 | 0.545688461 | 0.728 | 0.243 | 1.32E-44 | 12 | Snrpd2        |
| 1.53E-48 | 0.484017618 | 0.598 | 0.176 | 2.01E-44 | 12 | Gm10320       |
| 1.64E-48 | 0.466613891 | 0.448 | 0.112 | 2.17E-44 | 12 | Syncrip       |
| 2.08E-48 | 0.584779761 | 0.506 | 0.138 | 2.75E-44 | 12 | Comt          |
| 3.65E-48 | 0.517048787 | 0.598 | 0.178 | 4.81E-44 | 12 | St13          |
| 5.35E-48 | 0.611109099 | 0.889 | 0.364 | 7.06E-44 | 12 | Eif2s2        |
| 6.37E-48 | 0.550759403 | 0.992 | 0.698 | 8.40E-44 | 12 | Rpl28         |
| 6.96E-48 | 0.562293306 | 0.801 | 0.285 | 9.18E-44 | 12 | Polr2l        |
| 9.98E-48 | 0.499550624 | 0.337 | 0.072 | 1.32E-43 | 12 | C1qbp         |
| 1.62E-47 | 0.445949744 | 0.287 | 0.055 | 2.14E-43 | 12 | Gnl3          |
| 4.03E-47 | 0.501945882 | 0.655 | 0.204 | 5.32E-43 | 12 | Pgam1         |
| 6.83E-47 | 0.499145549 | 0.525 | 0.148 | 9.01E-43 | 12 | Nhp2l1        |
| 1.05E-46 | 0.61990533  | 0.939 | 0.455 | 1.38E-42 | 12 | Rpl27-ps3     |
| 1.12E-46 | 0.401559191 | 0.31  | 0.063 | 1.48E-42 | 12 | 1500011K16Rik |
| 2.87E-46 | 0.54351456  | 0.571 | 0.174 | 3.79E-42 | 12 | 2700094K13Rik |
| 3.96E-46 | 0.526798677 | 0.989 | 0.734 | 5.23E-42 | 12 | Rpl24         |
| 5.01E-46 | 0.545427519 | 0.989 | 0.683 | 6.60E-42 | 12 | Rpl10         |
| 5.17E-46 | 0.438898862 | 0.36  | 0.082 | 6.82E-42 | 12 | Nop58         |
| 5.67E-46 | 0.493996448 | 0.594 | 0.182 | 7.48E-42 | 12 | Al662270      |
| 1.03E-45 | 0.518326438 | 0.437 | 0.113 | 1.36E-41 | 12 | Mrpl42        |
| 1.23E-45 | 0.447952181 | 0.437 | 0.112 | 1.63E-41 | 12 | Fkbp3         |
| 1.92E-45 | 0.379442101 | 0.33  | 0.07  | 2.54E-41 | 12 | Tmem147       |
| 7.53E-45 | 0.512206155 | 0.996 | 0.734 | 9.93E-41 | 12 | Rps15         |
| 7.55E-45 | 0.4451246   | 0.36  | 0.082 | 9.96E-41 | 12 | Atp8b4        |
| 1.21E-44 | 0.431553484 | 0.295 | 0.06  | 1.60E-40 | 12 | Syce2         |
| 2.59E-44 | 0.482782064 | 1     | 0.845 | 3.41E-40 | 12 | Rpl13         |

|          |             |       |       |          |    |            |
|----------|-------------|-------|-------|----------|----|------------|
| 2.65E-44 | 0.589890571 | 0.946 | 0.445 | 3.50E-40 | 12 | Rpl30      |
| 3.29E-44 | 0.520588833 | 0.801 | 0.297 | 4.34E-40 | 12 | Eef1b2     |
| 3.93E-44 | 0.456826404 | 0.571 | 0.172 | 5.18E-40 | 12 | Eif3j1     |
| 4.01E-44 | 0.377480452 | 0.379 | 0.091 | 5.29E-40 | 12 | Mrpl36     |
| 4.89E-44 | 0.497468344 | 0.782 | 0.278 | 6.45E-40 | 12 | Atp5g2     |
| 4.99E-44 | 0.466957765 | 0.67  | 0.22  | 6.58E-40 | 12 | Ptges3     |
| 6.30E-44 | 0.444200698 | 0.544 | 0.16  | 8.31E-40 | 12 | Mrpl23     |
| 8.85E-44 | 0.594634211 | 0.939 | 0.489 | 1.17E-39 | 12 | Sec61b     |
| 1.44E-43 | 0.53856241  | 0.992 | 0.643 | 1.90E-39 | 12 | Rps10      |
| 1.74E-43 | 0.566569708 | 0.946 | 0.45  | 2.30E-39 | 12 | Rps18-ps3  |
| 1.89E-43 | 0.566176101 | 0.969 | 0.562 | 2.49E-39 | 12 | Rpl15      |
| 2.22E-43 | 0.43967619  | 0.464 | 0.127 | 2.92E-39 | 12 | Dtymk      |
| 2.74E-43 | 0.437523825 | 0.628 | 0.199 | 3.61E-39 | 12 | Slc25a3    |
| 2.88E-43 | 0.58905822  | 0.9   | 0.432 | 3.80E-39 | 12 | Atpif1     |
| 3.13E-43 | 0.524812506 | 0.992 | 0.679 | 4.12E-39 | 12 | Rps7       |
| 4.47E-43 | 0.555391709 | 0.793 | 0.301 | 5.90E-39 | 12 | Gm10036    |
| 4.95E-43 | 0.477253283 | 0.996 | 0.799 | 6.53E-39 | 12 | Rps16      |
| 6.41E-43 | 0.435952341 | 0.598 | 0.187 | 8.46E-39 | 12 | Zfp706     |
| 8.93E-43 | 0.534340173 | 0.797 | 0.307 | 1.18E-38 | 12 | Ap3s1      |
| 9.28E-43 | 0.550177666 | 0.946 | 0.458 | 1.22E-38 | 12 | Lgals1     |
| 9.58E-43 | 0.502230485 | 0.985 | 0.679 | 1.26E-38 | 12 | Rps13      |
| 1.13E-42 | 0.578885736 | 0.816 | 0.329 | 1.49E-38 | 12 | Cox7b      |
| 1.36E-42 | 0.414650547 | 0.333 | 0.076 | 1.79E-38 | 12 | Fkbp4      |
| 1.67E-42 | 0.440483175 | 0.398 | 0.102 | 2.20E-38 | 12 | Fbl        |
| 2.05E-42 | 0.425855727 | 0.398 | 0.101 | 2.71E-38 | 12 | Gadd45gip1 |
| 2.18E-42 | 0.462261992 | 0.693 | 0.233 | 2.87E-38 | 12 | Ndufb2     |
| 2.21E-42 | 0.389008218 | 0.383 | 0.095 | 2.91E-38 | 12 | Cct8       |
| 2.63E-42 | 0.480840025 | 0.992 | 0.697 | 3.47E-38 | 12 | Rpl31      |
| 3.56E-42 | 0.589579941 | 0.916 | 0.431 | 4.70E-38 | 12 | Uqcr11     |
| 4.05E-42 | 0.410598359 | 0.314 | 0.07  | 5.35E-38 | 12 | Mrps28     |
| 4.23E-42 | 0.576454782 | 0.908 | 0.414 | 5.57E-38 | 12 | Ybx1       |

|          |             |       |       |          |    |           |
|----------|-------------|-------|-------|----------|----|-----------|
| 4.83E-42 | 0.438063894 | 0.536 | 0.162 | 6.37E-38 | 12 | Eef1d     |
| 5.36E-42 | 0.449351131 | 0.544 | 0.165 | 7.07E-38 | 12 | Pdia3     |
| 6.54E-42 | 0.406803042 | 0.444 | 0.119 | 8.63E-38 | 12 | Fkbp1a    |
| 7.51E-42 | 0.507426084 | 0.797 | 0.304 | 9.90E-38 | 12 | Slc25a5   |
| 7.58E-42 | 0.477754278 | 0.655 | 0.219 | 1.00E-37 | 12 | Park7     |
| 8.20E-42 | 0.522541901 | 0.985 | 0.633 | 1.08E-37 | 12 | Rpl8      |
| 8.26E-42 | 0.472566521 | 0.996 | 0.797 | 1.09E-37 | 12 | Rps24     |
| 1.17E-41 | 0.34923056  | 0.284 | 0.058 | 1.54E-37 | 12 | Prmt1     |
| 1.80E-41 | 0.390313256 | 0.487 | 0.138 | 2.37E-37 | 12 | Ostc      |
| 1.80E-41 | 0.481375858 | 0.609 | 0.198 | 2.37E-37 | 12 | Pdap1     |
| 1.86E-41 | 0.328601355 | 0.352 | 0.084 | 2.46E-37 | 12 | Ccnd2     |
| 2.26E-41 | 0.452737949 | 0.437 | 0.12  | 2.98E-37 | 12 | Lsm7      |
| 2.30E-41 | 0.414413389 | 0.253 | 0.048 | 3.03E-37 | 12 | Gria3     |
| 3.07E-41 | 0.378406664 | 0.529 | 0.156 | 4.05E-37 | 12 | Ddx21     |
| 1.30E-40 | 0.408473673 | 0.295 | 0.064 | 1.72E-36 | 12 | Eif3b     |
| 2.46E-40 | 0.566137193 | 0.828 | 0.346 | 3.25E-36 | 12 | Ran       |
| 2.60E-40 | 0.514246562 | 0.927 | 0.418 | 3.43E-36 | 12 | Gnb2l1    |
| 2.63E-40 | 0.466892907 | 1     | 0.775 | 3.47E-36 | 12 | Rps5      |
| 3.19E-40 | 0.411142444 | 0.391 | 0.101 | 4.20E-36 | 12 | Gng12     |
| 8.48E-40 | 0.47800263  | 1     | 0.783 | 1.12E-35 | 12 | Ppia      |
| 1.18E-39 | 0.374621007 | 0.402 | 0.106 | 1.55E-35 | 12 | Pfdn1     |
| 1.29E-39 | 0.50613553  | 0.391 | 0.105 | 1.70E-35 | 12 | Ybx3      |
| 1.57E-39 | 0.402534992 | 0.521 | 0.158 | 2.07E-35 | 12 | Naa38     |
| 1.66E-39 | 0.55769053  | 0.889 | 0.407 | 2.19E-35 | 12 | Hint1     |
| 1.82E-39 | 0.405732141 | 0.46  | 0.132 | 2.41E-35 | 12 | Rpl7a-ps5 |
| 1.89E-39 | 0.460671784 | 0.989 | 0.753 | 2.49E-35 | 12 | Rpl17     |
| 2.64E-39 | 0.431907711 | 0.785 | 0.287 | 3.49E-35 | 12 | Canx      |
| 5.58E-39 | 0.416686215 | 0.36  | 0.091 | 7.37E-35 | 12 | Hells     |
| 5.96E-39 | 0.426637331 | 0.64  | 0.217 | 7.87E-35 | 12 | Snrpd3    |
| 9.10E-39 | 0.458594856 | 0.372 | 0.097 | 1.20E-34 | 12 | Cacybp    |
| 9.96E-39 | 0.445508781 | 0.563 | 0.182 | 1.31E-34 | 12 | Llph      |

|          |              |       |       |          |                  |
|----------|--------------|-------|-------|----------|------------------|
| 1.10E-38 | 0.531836247  | 0.893 | 0.408 | 1.45E-34 | 12 Serbp1        |
| 1.30E-38 | 0.35530462   | 0.295 | 0.066 | 1.71E-34 | 12 Nifk          |
| 1.30E-38 | 0.52255042   | 0.9   | 0.411 | 1.71E-34 | 12 Rpl5          |
| 1.99E-38 | 0.529889008  | 0.889 | 0.392 | 2.62E-34 | 12 2010107E04Rik |
| 2.99E-38 | 0.496820859  | 0.943 | 0.447 | 3.94E-34 | 12 Rpl10-ps3     |
| 4.63E-38 | 0.53523471   | 0.862 | 0.378 | 6.11E-34 | 12 Tomm7         |
| 4.85E-38 | 0.524334664  | 0.843 | 0.358 | 6.39E-34 | 12 Eif5a         |
| 5.03E-38 | 0.357634524  | 0.437 | 0.123 | 6.63E-34 | 12 Tapbpl        |
| 5.60E-38 | 0.331360797  | 0.326 | 0.078 | 7.38E-34 | 12 Emc6          |
| 6.49E-38 | 0.391232929  | 0.456 | 0.133 | 8.56E-34 | 12 Morf4l2       |
| 1.18E-37 | 0.397257457  | 0.387 | 0.104 | 1.56E-33 | 12 Svip          |
| 1.32E-37 | 0.421574957  | 0.575 | 0.19  | 1.74E-33 | 12 Ndufa5        |
| 1.56E-37 | 0.53479415   | 0.923 | 0.459 | 2.06E-33 | 12 Rps27l        |
| 1.85E-37 | -2.036701585 | 1     | 0.994 | 2.44E-33 | 12 S100a9        |
| 1.88E-37 | 0.309643311  | 0.318 | 0.075 | 2.48E-33 | 12 Rpn2          |
| 2.76E-37 | 0.373812874  | 0.487 | 0.148 | 3.64E-33 | 12 mt-Nd5        |
| 3.79E-37 | 0.44032433   | 0.739 | 0.274 | 5.00E-33 | 12 Nap1l1        |
| 4.67E-37 | 0.552064866  | 0.778 | 0.317 | 6.16E-33 | 12 Hnrnpa1       |
| 6.43E-37 | 0.497988082  | 0.973 | 0.617 | 8.49E-33 | 12 Uba52         |
| 6.79E-37 | 0.48133598   | 0.992 | 0.694 | 8.96E-33 | 12 Sub1          |
| 7.23E-37 | 0.344842564  | 0.548 | 0.173 | 9.54E-33 | 12 Thoc7         |
| 8.01E-37 | 0.29554518   | 0.253 | 0.052 | 1.06E-32 | 12 Bid           |
| 9.44E-37 | 0.458098069  | 0.992 | 0.714 | 1.25E-32 | 12 Rps4x         |
| 9.69E-37 | 0.388289227  | 0.609 | 0.204 | 1.28E-32 | 12 Swi5          |
| 1.13E-36 | 0.302578518  | 0.372 | 0.097 | 1.49E-32 | 12 Tifab         |
| 1.15E-36 | 0.453190199  | 0.996 | 0.751 | 1.52E-32 | 12 Rps3          |
| 1.54E-36 | 0.317169454  | 0.257 | 0.054 | 2.04E-32 | 12 Bcap29        |
| 1.62E-36 | 0.391434338  | 0.36  | 0.095 | 2.13E-32 | 12 Srpk1         |
| 1.82E-36 | 0.332292352  | 1     | 0.953 | 2.41E-32 | 12 mt-Co3        |
| 2.28E-36 | 0.495192488  | 0.985 | 0.595 | 3.01E-32 | 12 Gm11808       |
| 2.29E-36 | 0.373866336  | 0.437 | 0.128 | 3.02E-32 | 12 Eny2          |

|          |              |       |       |          |    |         |
|----------|--------------|-------|-------|----------|----|---------|
| 2.36E-36 | 0.425279438  | 0.506 | 0.161 | 3.11E-32 | 12 | Ndufab1 |
| 2.52E-36 | -1.938915858 | 1     | 0.999 | 3.32E-32 | 12 | S100a8  |
| 3.46E-36 | 0.394129436  | 0.67  | 0.24  | 4.56E-32 | 12 | Lsm6    |
| 4.11E-36 | 0.495610236  | 0.989 | 0.623 | 5.43E-32 | 12 | Sec61g  |
| 4.35E-36 | 0.350981882  | 0.387 | 0.106 | 5.74E-32 | 12 | Eif3i   |
| 5.21E-36 | 0.397151998  | 0.391 | 0.108 | 6.87E-32 | 12 | Nudc    |
| 5.44E-36 | 0.353924078  | 0.284 | 0.065 | 7.17E-32 | 12 | Ddx18   |
| 6.25E-36 | 0.289279847  | 0.299 | 0.07  | 8.24E-32 | 12 | Dnajc15 |
| 8.42E-36 | 0.440800197  | 0.732 | 0.28  | 1.11E-31 | 12 | Ndufc1  |
| 9.85E-36 | 0.418492066  | 0.314 | 0.079 | 1.30E-31 | 12 | Impdh2  |
| 1.08E-35 | 0.412662504  | 0.475 | 0.148 | 1.42E-31 | 12 | Banf1   |
| 1.11E-35 | 0.467384873  | 0.977 | 0.584 | 1.47E-31 | 12 | Rpl3    |
| 1.29E-35 | 0.494769441  | 0.897 | 0.415 | 1.70E-31 | 12 | Gm9493  |
| 1.66E-35 | 0.360097551  | 0.559 | 0.184 | 2.19E-31 | 12 | Gm10020 |
| 1.70E-35 | 0.433358507  | 0.996 | 0.678 | 2.24E-31 | 12 | Hmgb1   |
| 1.74E-35 | 0.332088017  | 0.253 | 0.054 | 2.29E-31 | 12 | Agpat5  |
| 1.84E-35 | 0.40215023   | 0.33  | 0.084 | 2.43E-31 | 12 | Cdk4    |
| 1.89E-35 | 0.282225272  | 0.307 | 0.074 | 2.49E-31 | 12 | Ahsa1   |
| 2.30E-35 | 0.351395095  | 0.674 | 0.239 | 3.04E-31 | 12 | Ndufb8  |
| 2.50E-35 | 0.470488052  | 0.782 | 0.313 | 3.30E-31 | 12 | Lsm5    |
| 2.98E-35 | 0.336416739  | 0.368 | 0.099 | 3.93E-31 | 12 | Eif1ax  |
| 3.22E-35 | 0.363033032  | 0.556 | 0.183 | 4.24E-31 | 12 | Caprin1 |
| 3.83E-35 | 0.362510377  | 0.521 | 0.169 | 5.06E-31 | 12 | Gm6133  |
| 4.58E-35 | 0.429362506  | 1     | 0.8   | 6.04E-31 | 12 | Rpl13a  |
| 4.81E-35 | 0.465494755  | 0.981 | 0.63  | 6.34E-31 | 12 | Rpl18   |
| 5.55E-35 | 0.396310905  | 1     | 0.869 | 7.32E-31 | 12 | Rpl18a  |
| 6.16E-35 | 0.4491898    | 0.816 | 0.331 | 8.12E-31 | 12 | Rpl6l   |
| 6.65E-35 | 0.396966637  | 0.314 | 0.079 | 8.78E-31 | 12 | Tcp1    |
| 1.28E-34 | 0.360888124  | 0.257 | 0.057 | 1.69E-30 | 12 | Idh3g   |
| 1.88E-34 | 0.439396845  | 0.693 | 0.264 | 2.48E-30 | 12 | Atp5b   |
| 2.40E-34 | 0.311197444  | 0.621 | 0.213 | 3.17E-30 | 12 | Spcs2   |

|          |             |       |       |          |    |         |
|----------|-------------|-------|-------|----------|----|---------|
| 2.84E-34 | 0.424038705 | 0.985 | 0.605 | 3.74E-30 | 12 | mt-Nd1  |
| 4.60E-34 | 0.373688666 | 0.517 | 0.17  | 6.07E-30 | 12 | Erdr1   |
| 4.85E-34 | 0.368206522 | 0.747 | 0.285 | 6.40E-30 | 12 | mt-Nd2  |
| 5.36E-34 | 0.407998724 | 0.54  | 0.181 | 7.07E-30 | 12 | Emb     |
| 7.29E-34 | 0.323271931 | 0.533 | 0.174 | 9.62E-30 | 12 | Mrps33  |
| 7.50E-34 | 0.495513724 | 0.912 | 0.452 | 9.90E-30 | 12 | Rpl29   |
| 1.02E-33 | 0.326702978 | 0.559 | 0.188 | 1.34E-29 | 12 | Srsf7   |
| 1.31E-33 | 0.405574747 | 0.992 | 0.797 | 1.73E-29 | 12 | Rpl34   |
| 2.65E-33 | 0.333922168 | 0.337 | 0.089 | 3.50E-29 | 12 | Glipr1  |
| 4.09E-33 | 0.405064882 | 0.352 | 0.098 | 5.39E-29 | 12 | Ssr2    |
| 5.16E-33 | 0.428795056 | 0.992 | 0.711 | 6.80E-29 | 12 | Rpl19   |
| 6.80E-33 | 0.405345207 | 0.582 | 0.208 | 8.97E-29 | 12 | Atp5a1  |
| 6.93E-33 | 0.277186173 | 0.257 | 0.058 | 9.14E-29 | 12 | Hint2   |
| 7.35E-33 | 0.369044781 | 0.299 | 0.075 | 9.69E-29 | 12 | Zfp422  |
| 8.64E-33 | 0.386611652 | 0.318 | 0.084 | 1.14E-28 | 12 | Tmem245 |
| 9.85E-33 | 0.366126535 | 0.349 | 0.097 | 1.30E-28 | 12 | Mrpl34  |
| 1.16E-32 | 0.349270267 | 0.284 | 0.07  | 1.53E-28 | 12 | Pabpc4  |
| 1.31E-32 | 0.310075611 | 0.284 | 0.069 | 1.72E-28 | 12 | Slc25a4 |
| 1.86E-32 | 0.430021097 | 0.996 | 0.699 | 2.45E-28 | 12 | Rplp0   |
| 2.57E-32 | 0.407089315 | 0.989 | 0.735 | 3.39E-28 | 12 | Rpl9    |
| 3.14E-32 | 0.455739211 | 0.958 | 0.575 | 4.15E-28 | 12 | Rpl4    |
| 6.87E-32 | 0.485784212 | 0.912 | 0.482 | 9.07E-28 | 12 | Rpl7a   |
| 6.97E-32 | 0.364925862 | 0.429 | 0.135 | 9.19E-28 | 12 | Chchd1  |
| 1.01E-31 | 0.344963998 | 0.398 | 0.12  | 1.33E-27 | 12 | Polr2f  |
| 1.20E-31 | 0.439272629 | 0.966 | 0.557 | 1.59E-27 | 12 | Rpl36a1 |
| 1.49E-31 | 0.335688918 | 0.391 | 0.116 | 1.97E-27 | 12 | Ndufv2  |
| 1.66E-31 | 0.327262303 | 0.268 | 0.065 | 2.19E-27 | 12 | Dnajc2  |
| 1.67E-31 | 0.373676044 | 0.778 | 0.322 | 2.21E-27 | 12 | Hsp90b1 |
| 1.69E-31 | 0.430186381 | 0.977 | 0.692 | 2.24E-27 | 12 | mt-Cytb |
| 2.43E-31 | 0.293949411 | 0.452 | 0.143 | 3.20E-27 | 12 | Magt1   |
| 2.46E-31 | 0.347936306 | 0.375 | 0.111 | 3.24E-27 | 12 | Lsm2    |

|          |             |       |       |          |    |               |
|----------|-------------|-------|-------|----------|----|---------------|
| 3.00E-31 | 0.351950856 | 0.575 | 0.204 | 3.96E-27 | 12 | Ssr1          |
| 3.37E-31 | 0.321818952 | 0.31  | 0.083 | 4.44E-27 | 12 | Cct2          |
| 3.84E-31 | 0.401917103 | 0.996 | 0.759 | 5.07E-27 | 12 | Rpl21         |
| 5.29E-31 | 0.32285084  | 0.414 | 0.128 | 6.97E-27 | 12 | Psma5         |
| 9.39E-31 | 0.320331574 | 0.475 | 0.156 | 1.24E-26 | 12 | Tomm20        |
| 9.45E-31 | 0.333216196 | 0.582 | 0.208 | 1.25E-26 | 12 | Snrpd1        |
| 9.94E-31 | 0.397099682 | 0.659 | 0.256 | 1.31E-26 | 12 | Atp5o         |
| 1.35E-30 | 0.256987039 | 0.395 | 0.118 | 1.78E-26 | 12 | Rpl13a-ps1    |
| 1.57E-30 | 0.363916658 | 0.467 | 0.155 | 2.07E-26 | 12 | Higd1a        |
| 1.69E-30 | 0.414759128 | 0.996 | 0.67  | 2.23E-26 | 12 | Rpsa          |
| 1.70E-30 | 0.33901785  | 0.372 | 0.111 | 2.24E-26 | 12 | Cdc26         |
| 2.58E-30 | 0.422249308 | 0.889 | 0.416 | 3.40E-26 | 12 | Rpl13-ps3     |
| 4.62E-30 | 0.434591839 | 0.851 | 0.387 | 6.09E-26 | 12 | Uqcrq         |
| 5.62E-30 | 0.378430267 | 0.996 | 0.786 | 7.42E-26 | 12 | Rps11         |
| 5.63E-30 | 0.325038465 | 0.337 | 0.096 | 7.43E-26 | 12 | Ddost         |
| 6.23E-30 | 0.354588005 | 0.261 | 0.065 | 8.22E-26 | 12 | Paics         |
| 6.42E-30 | 0.466383995 | 0.958 | 0.588 | 8.47E-26 | 12 | Cox7c         |
| 6.44E-30 | 0.404853369 | 0.59  | 0.224 | 8.50E-26 | 12 | Cks1b         |
| 6.51E-30 | 0.378401967 | 0.368 | 0.111 | 8.59E-26 | 12 | Wbp5          |
| 6.57E-30 | 0.340891715 | 0.517 | 0.179 | 8.67E-26 | 12 | Dut           |
| 6.60E-30 | 0.340189614 | 0.521 | 0.183 | 8.71E-26 | 12 | 2410015M20Rik |
| 7.27E-30 | 0.385188844 | 0.713 | 0.286 | 9.59E-26 | 12 | Uqcrb         |
| 1.04E-29 | 0.333389838 | 0.36  | 0.107 | 1.37E-25 | 12 | Nars          |
| 1.20E-29 | 0.282372688 | 0.402 | 0.125 | 1.58E-25 | 12 | Smim11        |
| 1.65E-29 | 0.298837177 | 0.257 | 0.063 | 2.17E-25 | 12 | Exosc5        |
| 2.19E-29 | 0.405823708 | 0.996 | 0.645 | 2.90E-25 | 12 | Eef1a1        |
| 2.94E-29 | 0.449711835 | 0.866 | 0.43  | 3.88E-25 | 12 | Rpl9-ps6      |
| 3.07E-29 | 0.278655675 | 0.395 | 0.123 | 4.05E-25 | 12 | Zfos1         |
| 3.77E-29 | 0.273357954 | 0.318 | 0.088 | 4.97E-25 | 12 | Mdh1          |
| 4.85E-29 | 0.381917329 | 0.628 | 0.244 | 6.39E-25 | 12 | Atp5g3        |
| 6.33E-29 | 0.372717373 | 0.732 | 0.299 | 8.35E-25 | 12 | Snrpe         |



|          |             |       |       |          |            |
|----------|-------------|-------|-------|----------|------------|
| 6.77E-29 | 0.29583059  | 0.391 | 0.122 | 8.93E-25 | 12 Nudt21  |
| 9.27E-29 | 0.261057907 | 0.257 | 0.064 | 1.22E-24 | 12 Dph3    |
| 1.29E-28 | 0.255137978 | 0.268 | 0.069 | 1.70E-24 | 12 Ndufs3  |
| 1.45E-28 | 0.342957836 | 0.307 | 0.087 | 1.91E-24 | 12 Mrpl12  |
| 2.02E-28 | 0.337922699 | 0.456 | 0.155 | 2.67E-24 | 12 Ssr3    |
| 2.33E-28 | 0.269471625 | 0.33  | 0.095 | 3.08E-24 | 12 Mgat2   |
| 2.49E-28 | 0.457042915 | 0.923 | 0.517 | 3.29E-24 | 12 Atp5k   |
| 2.86E-28 | 0.314738866 | 0.364 | 0.112 | 3.77E-24 | 12 Eif2s3x |
| 3.42E-28 | 0.310924079 | 0.552 | 0.202 | 4.51E-24 | 12 Erp29   |
| 3.74E-28 | 0.253844137 | 0.295 | 0.081 | 4.93E-24 | 12 Mydgf   |
| 4.12E-28 | 0.331577832 | 0.559 | 0.208 | 5.43E-24 | 12 Ndufc2  |
| 4.28E-28 | 0.305038246 | 0.341 | 0.102 | 5.65E-24 | 12 Phb2    |
| 4.42E-28 | 0.306747225 | 0.69  | 0.265 | 5.83E-24 | 12 Tra2b   |
| 4.91E-28 | 0.314423509 | 0.314 | 0.09  | 6.48E-24 | 12 Sms     |
| 6.46E-28 | 0.381712461 | 0.743 | 0.318 | 8.52E-24 | 12 Cox5a   |
| 6.65E-28 | 0.369745431 | 0.839 | 0.378 | 8.77E-24 | 12 mt-Atp8 |
| 6.69E-28 | 0.302261366 | 0.337 | 0.1   | 8.82E-24 | 12 Lman2   |
| 6.80E-28 | 0.344451668 | 0.314 | 0.091 | 8.97E-24 | 12 Gspt1   |
| 7.04E-28 | 0.256759143 | 0.307 | 0.086 | 9.28E-24 | 12 Dnajc3  |
| 1.04E-27 | 0.333973036 | 0.663 | 0.262 | 1.37E-23 | 12 mt-Nd4l |
| 1.12E-27 | 0.422882197 | 0.9   | 0.451 | 1.48E-23 | 12 Gm8730  |
| 1.30E-27 | 0.324776609 | 1     | 0.876 | 1.71E-23 | 12 Rps14   |
| 1.39E-27 | 0.325573771 | 0.517 | 0.188 | 1.84E-23 | 12 Ndufb5  |
| 1.55E-27 | 0.321303112 | 0.49  | 0.173 | 2.05E-23 | 12 Gm11273 |
| 1.58E-27 | 0.331631958 | 0.521 | 0.19  | 2.08E-23 | 12 Supt16  |
| 1.66E-27 | 0.305454432 | 0.333 | 0.099 | 2.19E-23 | 12 Nup210  |
| 2.15E-27 | 0.350838499 | 0.387 | 0.125 | 2.84E-23 | 12 Naa50   |
| 2.32E-27 | 0.284462336 | 0.322 | 0.094 | 3.06E-23 | 12 Mcm5    |
| 3.17E-27 | 0.319463796 | 0.303 | 0.087 | 4.19E-23 | 12 Hmgn5   |
| 3.52E-27 | 0.352149182 | 0.318 | 0.094 | 4.65E-23 | 12 Rgcc    |
| 3.70E-27 | 0.314765615 | 0.372 | 0.118 | 4.88E-23 | 12 Magoh   |

|          |              |       |       |          |             |
|----------|--------------|-------|-------|----------|-------------|
| 7.99E-27 | 0.280863937  | 0.529 | 0.192 | 1.05E-22 | 12 Ewsr1    |
| 8.36E-27 | 0.383117984  | 0.632 | 0.255 | 1.10E-22 | 12 Romo1    |
| 8.36E-27 | 0.3138039    | 0.372 | 0.119 | 1.10E-22 | 12 Mrpl54   |
| 9.33E-27 | 0.264701501  | 0.307 | 0.089 | 1.23E-22 | 12 Kcnq1ot1 |
| 1.12E-26 | 0.288810147  | 0.678 | 0.264 | 1.47E-22 | 12 Hnrnpab  |
| 1.50E-26 | -0.639770481 | 1     | 0.997 | 1.98E-22 | 12 Malat1   |
| 1.90E-26 | 0.265859948  | 0.41  | 0.136 | 2.50E-22 | 12 Eif3c    |
| 2.36E-26 | 0.293452199  | 0.318 | 0.095 | 3.11E-22 | 12 Huwe1    |
| 2.54E-26 | 0.314014447  | 0.586 | 0.225 | 3.35E-22 | 12 Eif5b    |
| 3.02E-26 | 0.320816903  | 0.605 | 0.238 | 3.99E-22 | 12 Timm13   |
| 3.52E-26 | 0.264638299  | 0.299 | 0.087 | 4.65E-22 | 12 Cfdp1    |
| 3.58E-26 | 0.266951492  | 0.383 | 0.124 | 4.72E-22 | 12 Med21    |
| 4.08E-26 | 0.400742876  | 0.946 | 0.53  | 5.38E-22 | 12 Rpl7     |
| 4.10E-26 | 0.428418362  | 0.874 | 0.455 | 5.41E-22 | 12 Ndufa4   |
| 4.87E-26 | 0.306786704  | 0.295 | 0.086 | 6.42E-22 | 12 Rcc2     |
| 4.93E-26 | 0.371566929  | 0.87  | 0.431 | 6.51E-22 | 12 Psm7     |
| 5.03E-26 | 0.330728411  | 0.418 | 0.144 | 6.64E-22 | 12 mt-Nd3   |
| 5.18E-26 | 0.281573038  | 0.567 | 0.216 | 6.83E-22 | 12 Anp32e   |
| 6.50E-26 | -1.980443646 | 0.992 | 0.928 | 8.58E-22 | 12 Camp     |
| 7.04E-26 | 0.290786601  | 0.464 | 0.165 | 9.28E-22 | 12 Lsm3     |
| 7.25E-26 | 0.319394902  | 0.456 | 0.161 | 9.56E-22 | 12 U2af1    |
| 8.51E-26 | 0.292509788  | 0.284 | 0.081 | 1.12E-21 | 12 Mrpl21   |
| 1.35E-25 | 0.279503005  | 0.513 | 0.19  | 1.78E-21 | 12 Ssb      |
| 1.51E-25 | 0.401822838  | 0.831 | 0.394 | 2.00E-21 | 12 Chchd2   |
| 1.68E-25 | 0.250506347  | 0.337 | 0.105 | 2.21E-21 | 12 Naa15    |
| 1.86E-25 | 0.369956885  | 0.839 | 0.39  | 2.45E-21 | 12 Anp32b   |
| 2.44E-25 | 0.275006988  | 0.303 | 0.089 | 3.22E-21 | 12 Mcm6     |
| 3.83E-25 | 0.253479825  | 0.28  | 0.08  | 5.05E-21 | 12 Golga3   |
| 4.13E-25 | 0.362412866  | 0.31  | 0.096 | 5.45E-21 | 12 Mcm7     |
| 4.84E-25 | 0.300357115  | 0.582 | 0.229 | 6.38E-21 | 12 Atp5f1   |
| 4.86E-25 | 0.270752877  | 0.467 | 0.17  | 6.41E-21 | 12 Trmt112  |

|          |             |       |       |          |    |               |
|----------|-------------|-------|-------|----------|----|---------------|
| 5.17E-25 | 0.270886144 | 0.391 | 0.131 | 6.82E-21 | 12 | Ndufs8        |
| 6.82E-25 | 0.306206256 | 0.464 | 0.168 | 8.99E-21 | 12 | Dnmt1         |
| 1.17E-24 | 0.278425048 | 0.345 | 0.111 | 1.55E-20 | 12 | Tomm6         |
| 1.36E-24 | 0.264744488 | 0.632 | 0.254 | 1.80E-20 | 12 | Tmed2         |
| 1.45E-24 | 0.302526529 | 0.598 | 0.239 | 1.91E-20 | 12 | Eif3a         |
| 1.53E-24 | 0.313531709 | 0.414 | 0.146 | 2.02E-20 | 12 | Dpy30         |
| 1.60E-24 | 0.281758682 | 0.349 | 0.113 | 2.11E-20 | 12 | Pfdn6         |
| 2.62E-24 | 0.275301439 | 0.33  | 0.104 | 3.46E-20 | 12 | Ptpn7         |
| 2.82E-24 | 0.277426269 | 0.636 | 0.264 | 3.72E-20 | 12 | Slpi          |
| 2.89E-24 | 0.285978378 | 0.345 | 0.112 | 3.82E-20 | 12 | Cenpw         |
| 3.17E-24 | 0.291437836 | 0.356 | 0.118 | 4.18E-20 | 12 | Zc3h15        |
| 3.26E-24 | 0.255729358 | 0.345 | 0.111 | 4.30E-20 | 12 | Tpi1          |
| 3.49E-24 | 0.420935369 | 0.904 | 0.53  | 4.60E-20 | 12 | Hspa8         |
| 3.72E-24 | 0.323142872 | 0.276 | 0.081 | 4.91E-20 | 12 | 2810004N23Rik |
| 5.88E-24 | 0.271709107 | 0.295 | 0.089 | 7.75E-20 | 12 | Eif3g         |
| 6.71E-24 | 0.37343472  | 0.866 | 0.434 | 8.85E-20 | 12 | Naca          |
| 7.93E-24 | 0.293817865 | 0.253 | 0.072 | 1.05E-19 | 12 | Knop1         |
| 8.59E-24 | 0.283035203 | 0.678 | 0.284 | 1.13E-19 | 12 | Ost4          |
| 9.91E-24 | 0.316491475 | 0.307 | 0.096 | 1.31E-19 | 12 | Cct5          |
| 1.30E-23 | 0.285893397 | 0.253 | 0.072 | 1.72E-19 | 12 | Grpel1        |
| 1.36E-23 | 0.316949394 | 0.793 | 0.355 | 1.80E-19 | 12 | Srsf2         |
| 1.43E-23 | 0.258343131 | 0.261 | 0.075 | 1.89E-19 | 12 | 1810022K09Rik |
| 1.48E-23 | 0.259572325 | 0.475 | 0.177 | 1.96E-19 | 12 | Psmb2         |
| 1.64E-23 | 0.262912056 | 0.686 | 0.285 | 2.16E-19 | 12 | Sfpq          |
| 1.73E-23 | 0.28710535  | 0.598 | 0.242 | 2.28E-19 | 12 | Alyref        |
| 2.13E-23 | 0.295356047 | 0.456 | 0.171 | 2.81E-19 | 12 | Pcna          |
| 2.60E-23 | 0.313189663 | 0.291 | 0.09  | 3.43E-19 | 12 | Rbbp7         |
| 3.11E-23 | 0.288012053 | 0.291 | 0.089 | 4.10E-19 | 12 | Aimp1         |
| 3.36E-23 | 0.264300974 | 0.406 | 0.144 | 4.43E-19 | 12 | Snrpb2        |
| 3.36E-23 | 0.339512829 | 0.801 | 0.365 | 4.44E-19 | 12 | Minos1        |
| 3.57E-23 | 0.347382629 | 0.828 | 0.396 | 4.70E-19 | 12 | Gapdh         |

|          |              |       |       |          |    |         |
|----------|--------------|-------|-------|----------|----|---------|
| 4.22E-23 | 0.25166662   | 0.402 | 0.142 | 5.57E-19 | 12 | Ndufb6  |
| 4.29E-23 | 0.369826071  | 0.885 | 0.436 | 5.66E-19 | 12 | Uqcr10  |
| 5.07E-23 | 0.343706001  | 0.751 | 0.351 | 6.69E-19 | 12 | Tuba1b  |
| 5.12E-23 | 0.286471183  | 0.716 | 0.31  | 6.75E-19 | 12 | Ndufa7  |
| 6.06E-23 | -0.921977325 | 0.77  | 0.728 | 8.00E-19 | 12 | Cd52    |
| 9.17E-23 | 0.275577168  | 0.291 | 0.091 | 1.21E-18 | 12 | Phf5a   |
| 1.22E-22 | 0.30647342   | 0.67  | 0.289 | 1.61E-18 | 12 | Hnrnnp  |
| 1.29E-22 | 0.352851233  | 0.774 | 0.369 | 1.71E-18 | 12 | Tmem258 |
| 1.45E-22 | 0.252514005  | 0.406 | 0.146 | 1.91E-18 | 12 | Hnrnpa0 |
| 1.82E-22 | 0.253354859  | 0.613 | 0.25  | 2.40E-18 | 12 | Ndufs6  |
| 2.21E-22 | -0.631002017 | 1     | 0.999 | 2.91E-18 | 12 | Actb    |
| 2.45E-22 | 0.369272866  | 0.935 | 0.535 | 3.24E-18 | 12 | Cox6b1  |
| 3.46E-22 | 0.267682398  | 0.383 | 0.137 | 4.57E-18 | 12 | Mrpl51  |
| 4.01E-22 | 0.293719839  | 0.299 | 0.096 | 5.29E-18 | 12 | Hyou1   |
| 4.36E-22 | 0.315957217  | 0.69  | 0.305 | 5.76E-18 | 12 | Hnrnpu  |
| 4.87E-22 | 0.367906823  | 0.962 | 0.61  | 6.43E-18 | 12 | Cox6c   |
| 8.77E-22 | 0.269371907  | 0.307 | 0.1   | 1.16E-17 | 12 | Fundc2  |
| 1.02E-21 | 0.277412252  | 0.41  | 0.153 | 1.34E-17 | 12 | Lig1    |
| 1.38E-21 | 0.363352582  | 0.858 | 0.452 | 1.82E-17 | 12 | Cox5b   |
| 1.41E-21 | 0.323810801  | 0.755 | 0.358 | 1.86E-17 | 12 | Tmem256 |
| 1.80E-21 | 0.265582156  | 0.782 | 0.359 | 2.38E-17 | 12 | Btf3    |
| 2.17E-21 | 0.27313772   | 0.318 | 0.106 | 2.87E-17 | 12 | Anxa3   |
| 2.42E-21 | 0.312669187  | 0.962 | 0.554 | 3.19E-17 | 12 | mt-Nd4  |
| 2.78E-21 | 0.275814058  | 0.414 | 0.155 | 3.67E-17 | 12 | Stra13  |
| 4.69E-21 | 0.253037779  | 0.326 | 0.111 | 6.19E-17 | 12 | Mlec    |
| 5.04E-21 | -2.01755944  | 0.966 | 0.845 | 6.65E-17 | 12 | Ngp     |
| 5.41E-21 | 0.265210327  | 0.253 | 0.077 | 7.14E-17 | 12 | Psmc7   |
| 5.96E-21 | 0.280469283  | 0.77  | 0.353 | 7.86E-17 | 12 | Myeov2  |
| 7.48E-21 | 0.304333317  | 0.835 | 0.409 | 9.87E-17 | 12 | Eef2    |
| 8.57E-21 | 0.260278616  | 1     | 0.853 | 1.13E-16 | 12 | mt-Atp6 |
| 9.77E-21 | 0.278396346  | 0.287 | 0.094 | 1.29E-16 | 12 | Denr    |

|          |              |       |       |          |    |           |
|----------|--------------|-------|-------|----------|----|-----------|
| 1.10E-20 | 0.256247787  | 0.264 | 0.083 | 1.45E-16 | 12 | Mrps36    |
| 2.78E-20 | 0.278409646  | 0.264 | 0.084 | 3.67E-16 | 12 | Wdr61     |
| 4.55E-20 | -1.268640147 | 0.341 | 0.508 | 6.00E-16 | 12 | Cybb      |
| 5.10E-20 | 0.259801658  | 0.801 | 0.386 | 6.72E-16 | 12 | Dbi       |
| 6.58E-20 | -0.843351828 | 0.705 | 0.683 | 8.69E-16 | 12 | Cyba      |
| 9.68E-20 | 0.27901238   | 0.257 | 0.082 | 1.28E-15 | 12 | Plk4      |
| 1.36E-19 | 0.298598329  | 0.693 | 0.323 | 1.79E-15 | 12 | Srsf3     |
| 2.37E-19 | 0.356825588  | 0.824 | 0.436 | 3.13E-15 | 12 | Usmg5     |
| 3.96E-19 | -1.477884738 | 0.406 | 0.537 | 5.22E-15 | 12 | S100a6    |
| 4.90E-19 | -1.592235393 | 0.464 | 0.556 | 6.46E-15 | 12 | Chil3     |
| 3.45E-18 | 0.25506582   | 0.908 | 0.491 | 4.55E-14 | 12 | Cbx3      |
| 5.92E-18 | 0.326825983  | 0.927 | 0.558 | 7.80E-14 | 12 | Cox8a     |
| 7.19E-18 | 0.310410583  | 0.858 | 0.482 | 9.49E-14 | 12 | Tubb5     |
| 6.97E-17 | 0.275183706  | 0.831 | 0.435 | 9.19E-13 | 12 | Hnrnpa3   |
| 2.47E-16 | 0.296211873  | 0.877 | 0.505 | 3.26E-12 | 12 | Atp5j2    |
| 2.53E-16 | -1.848158243 | 0.471 | 0.544 | 3.34E-12 | 12 | Ltf       |
| 3.01E-16 | -1.838717106 | 0.674 | 0.628 | 3.97E-12 | 12 | Wfdc21    |
| 4.12E-16 | 0.302960705  | 0.923 | 0.601 | 5.44E-12 | 12 | Ly6c2     |
| 9.39E-16 | -0.659265096 | 0.923 | 0.811 | 1.24E-11 | 12 | Tyrobp    |
| 1.10E-15 | -1.547483961 | 0.172 | 0.368 | 1.46E-11 | 12 | Ifitm6    |
| 3.82E-15 | -1.90475191  | 0.536 | 0.559 | 5.04E-11 | 12 | Lcn2      |
| 5.37E-15 | 0.278516235  | 0.912 | 0.553 | 7.08E-11 | 12 | Hnrnpa2b1 |
| 8.14E-15 | 0.275471824  | 0.877 | 0.496 | 1.07E-10 | 12 | Pabpc1    |
| 9.30E-15 | 0.275059277  | 0.939 | 0.588 | 1.23E-10 | 12 | Atp5e     |
| 1.72E-14 | 0.259982461  | 0.958 | 0.636 | 2.27E-10 | 12 | Atp5l     |
| 1.94E-14 | -0.700602501 | 0.778 | 0.711 | 2.56E-10 | 12 | Fcer1g    |
| 9.45E-14 | -1.517397692 | 0.337 | 0.452 | 1.25E-09 | 12 | Pglyrp1   |
| 3.37E-13 | 0.253536286  | 0.812 | 0.461 | 4.44E-09 | 12 | Cox7a2    |
| 2.73E-12 | -0.740643231 | 0.716 | 0.642 | 3.60E-08 | 12 | Prdx5     |
| 9.25E-11 | -1.103546225 | 0.176 | 0.322 | 1.22E-06 | 12 | Lsp1      |
| 5.69E-10 | -0.348049994 | 0.931 | 0.831 | 7.50E-06 | 12 | Pfn1      |

|            |              |       |       |             |    |          |
|------------|--------------|-------|-------|-------------|----|----------|
| 2.93E-09   | -1.051660041 | 0.375 | 0.441 | 3.87E-05    | 12 | Lgals3   |
| 7.81E-09   | -1.104367481 | 0.375 | 0.432 | 0.000103013 | 12 | Anxa1    |
| 7.91E-09   | -1.223155255 | 0.625 | 0.556 | 0.000104403 | 12 | Ifitm3   |
| 1.37E-07   | -1.466946614 | 0.287 | 0.362 | 0.001801723 | 12 | Ifi27l2a |
| 4.12E-07   | -1.146479823 | 0.778 | 0.631 | 0.005431775 | 12 | Crip1    |
| 8.72E-06   | -0.31702692  | 0.95  | 0.767 | 0.115018044 | 12 | H3f3a    |
| 4.86E-05   | -0.842245154 | 0.651 | 0.539 | 0.641372779 | 12 | Psap     |
| 6.89E-05   | -0.428702514 | 0.816 | 0.642 | 0.908481165 | 12 | Itm2b    |
| 7.81E-05   | -0.341974389 | 0.885 | 0.701 | 1           | 12 | Myl6     |
| 0.00010778 | -0.41244844  | 0.847 | 0.657 | 1           | 12 | Arhgdib  |
| 0.00019588 | -0.89083066  | 0.192 | 0.252 | 1           | 12 | Tmcc1    |
| 0.00021606 | -0.740664181 | 0.207 | 0.268 | 1           | 12 | Clec4a2  |
| 0.00032307 | -0.681867734 | 0.498 | 0.453 | 1           | 12 | Hp       |
| 0.00093038 | -0.669888899 | 0.31  | 0.182 | 1           | 12 | Bst2     |
| 0.00279064 | -0.748052113 | 0.307 | 0.316 | 1           | 12 | Ptprc    |
| 0.00365551 | -0.263192132 | 0.448 | 0.272 | 1           | 12 | Lcp1     |
| 0.00491455 | -0.34139923  | 0.935 | 0.764 | 1           | 12 | B2m      |
| 0.00507574 | -0.362867189 | 0.41  | 0.251 | 1           | 12 | Gm9844   |
| 0.00710066 | -0.727040209 | 0.391 | 0.363 | 1           | 12 | Lst1     |
| 0.00739616 | -0.645582701 | 0.375 | 0.369 | 1           | 12 | Myh9     |
| 0.00750575 | -0.272591073 | 0.429 | 0.266 | 1           | 12 | Gabarap  |
| 0.00752387 | -0.292227356 | 0.854 | 0.679 | 1           | 12 | Actg1    |
| 0          | 2.267786924  | 0.92  | 0.047 | 0           | 13 | Car2     |
| 0          | 2.014054229  | 0.764 | 0.025 | 0           | 13 | Car1     |
| 0          | 1.607811611  | 0.598 | 0.006 | 0           | 13 | Mt2      |
| 0          | 1.496237731  | 0.704 | 0.041 | 0           | 13 | Fam132a  |
| 0          | 1.452960043  | 0.573 | 0.023 | 0           | 13 | Nfia     |
| 0          | 1.371486656  | 0.668 | 0.024 | 0           | 13 | Aqp1     |
| 0          | 1.248682834  | 0.553 | 0.011 | 0           | 13 | Ermap    |
| 0          | 1.23085922   | 0.523 | 0.017 | 0           | 13 | Smim1    |
| 0          | 1.181794729  | 0.533 | 0.013 | 0           | 13 | Abcb4    |

**Car enzyme HPC**

|           |             |       |       |           |             |
|-----------|-------------|-------|-------|-----------|-------------|
| 0         | 1.157353285 | 0.503 | 0.011 | 0         | 13 Klf1     |
| 0         | 0.784008122 | 0.327 | 0.004 | 0         | 13 Ces2g    |
| 0         | 0.773726524 | 0.347 | 0.003 | 0         | 13 Atp1b2   |
| 1.44E-287 | 0.661837613 | 0.281 | 0.003 | 1.90E-283 | 13 Sphk1    |
| 1.40E-274 | 0.976126885 | 0.442 | 0.015 | 1.85E-270 | 13 Stard10  |
| 7.22E-265 | 1.24923057  | 0.583 | 0.033 | 9.52E-261 | 13 Minpp1   |
| 4.60E-253 | 1.145293937 | 0.558 | 0.031 | 6.06E-249 | 13 Cpox     |
| 4.61E-238 | 0.774100436 | 0.357 | 0.011 | 6.08E-234 | 13 Gata1    |
| 1.10E-236 | 0.741048274 | 0.302 | 0.007 | 1.45E-232 | 13 Nxpe2    |
| 7.83E-226 | 0.86724766  | 0.377 | 0.014 | 1.03E-221 | 13 Pla2g12a |
| 1.76E-223 | 0.692719483 | 0.332 | 0.01  | 2.32E-219 | 13          |
| 6.79E-213 | 0.778998979 | 0.286 | 0.007 | 8.95E-209 | 13 Rhag     |
| 1.79E-211 | 0.997418807 | 0.497 | 0.03  | 2.36E-207 | 13 Mns1     |
| 1.24E-202 | 1.198585987 | 0.618 | 0.051 | 1.64E-198 | 13 Blvrb    |
| 1.13E-199 | 0.94799177  | 0.377 | 0.017 | 1.49E-195 | 13 Hemgn    |
| 7.84E-190 | 0.746148068 | 0.317 | 0.012 | 1.03E-185 | 13 Gstm5    |
| 2.27E-184 | 0.629840711 | 0.276 | 0.008 | 2.99E-180 | 13 Cyth3    |
| 3.21E-180 | 0.709144622 | 0.281 | 0.009 | 4.23E-176 | 13 Hebp1    |
| 1.23E-176 | 0.885708836 | 0.332 | 0.015 | 1.62E-172 | 13 Ctse     |
| 2.64E-174 | 1.387304941 | 0.789 | 0.106 | 3.49E-170 | 13 Glrx5    |
| 2.75E-172 | 0.647591966 | 0.251 | 0.007 | 3.63E-168 | 13 Cldn13   |
| 3.82E-169 | 1.523591465 | 0.739 | 0.099 | 5.03E-165 | 13 Mt1      |
| 9.92E-164 | 1.003891906 | 0.533 | 0.047 | 1.31E-159 | 13 Odc1     |
| 2.17E-162 | 0.942524586 | 0.553 | 0.051 | 2.87E-158 | 13 Cox6b2   |
| 8.45E-159 | 1.090063705 | 0.598 | 0.063 | 1.12E-154 | 13 Hmgb3    |
| 8.77E-155 | 0.794257956 | 0.432 | 0.032 | 1.16E-150 | 13 Chchd10  |
| 5.04E-153 | 1.073906568 | 0.578 | 0.06  | 6.65E-149 | 13 Tfrc     |
| 1.54E-149 | 0.683197161 | 0.332 | 0.018 | 2.04E-145 | 13 Rangrf   |
| 1.50E-148 | 1.119455002 | 0.573 | 0.063 | 1.97E-144 | 13 Pabpc4   |
| 3.69E-148 | 0.734587923 | 0.342 | 0.02  | 4.87E-144 | 13 Ubac1    |
| 8.68E-148 | 0.724798358 | 0.307 | 0.016 | 1.15E-143 | 13 Zfpm1    |

8-Sep

|           |             |       |       |           |                  |
|-----------|-------------|-------|-------|-----------|------------------|
| 5.90E-146 | 0.806386704 | 0.342 | 0.02  | 7.78E-142 | 13 Ifrd2         |
| 9.28E-146 | 0.90934805  | 0.528 | 0.054 | 1.22E-141 | 13 Hba-a2        |
| 2.13E-136 | 0.602962204 | 0.296 | 0.016 | 2.80E-132 | 13 Mthfd1        |
| 3.36E-134 | 0.700098618 | 0.362 | 0.026 | 4.43E-130 | 13 Tmem238       |
| 1.36E-133 | 0.988408633 | 0.633 | 0.082 | 1.79E-129 | 13 Bola3         |
| 5.41E-123 | 0.715632123 | 0.367 | 0.029 | 7.13E-119 | 13 Hmbs          |
| 4.10E-121 | 0.59171546  | 0.312 | 0.021 | 5.41E-117 | 13 Kcnn4         |
| 2.60E-120 | 1.152292061 | 0.553 | 0.076 | 3.43E-116 | 13 Hba-a1        |
| 3.37E-120 | 0.985122209 | 0.668 | 0.1   | 4.45E-116 | 13 Hmgn1         |
| 3.30E-114 | 1.437494092 | 0.879 | 0.235 | 4.35E-110 | 13 Ncl           |
| 3.91E-113 | 0.916186288 | 0.533 | 0.069 | 5.16E-109 | 13 C1qbp         |
| 8.49E-113 | 0.833888949 | 0.508 | 0.062 | 1.12E-108 | 13 Gclm          |
| 9.70E-112 | 1.08370971  | 0.729 | 0.128 | 1.28E-107 | 13 Prdx2         |
| 2.51E-111 | 0.807493916 | 0.457 | 0.051 | 3.31E-107 | 13 Wdr43         |
| 5.16E-111 | 1.176220053 | 0.749 | 0.147 | 6.80E-107 | 13 Hdgf          |
| 9.87E-111 | 0.865045242 | 0.553 | 0.074 | 1.30E-106 | 13 2810004N23Rik |
| 1.26E-110 | 0.613517854 | 0.302 | 0.022 | 1.66E-106 | 13 Alad          |
| 2.60E-110 | 0.658395853 | 0.357 | 0.031 | 3.42E-106 | 13 Ahctf1        |
| 4.39E-110 | -1.79981761 | 0.97  | 0.997 | 5.79E-106 | 13 Tmsb4x        |
| 8.95E-110 | 0.987925014 | 0.638 | 0.1   | 1.18E-105 | 13 Ybx3          |
| 1.83E-109 | 1.052181746 | 0.543 | 0.074 | 2.42E-105 | 13 Golga3        |
| 5.96E-109 | 1.11413149  | 0.819 | 0.172 | 7.86E-105 | 13 Dut           |
| 2.08E-107 | 0.634496528 | 0.312 | 0.024 | 2.74E-103 | 13 Gm10110       |
| 1.14E-106 | 0.678166199 | 0.367 | 0.034 | 1.50E-102 | 13 Ammecn1       |
| 1.69E-106 | 0.84364426  | 0.447 | 0.052 | 2.23E-102 | 13 Gnl3          |
| 1.18E-105 | 0.680406535 | 0.492 | 0.061 | 1.55E-101 | 13 Ppp1r14b      |
| 2.66E-104 | 0.871028876 | 0.462 | 0.056 | 3.51E-100 | 13 Pola2         |
| 3.17E-104 | 1.007032878 | 0.598 | 0.096 | 4.18E-100 | 13 Hspd1         |
| 1.96E-103 | 0.613004601 | 0.302 | 0.023 | 2.59E-99  | 13 Ubxn2a        |
| 1.02E-101 | 1.143438996 | 0.839 | 0.195 | 1.35E-97  | 13 Pdap1         |
| 1.18E-100 | 0.800520781 | 0.548 | 0.079 | 1.56E-96  | 13 Nop58         |



|          |             |       |       |          |            |
|----------|-------------|-------|-------|----------|------------|
| 1.66E-99 | 1.019145969 | 0.789 | 0.165 | 2.18E-95 | 13 Mrpl52  |
| 2.67E-99 | 0.767227068 | 0.412 | 0.047 | 3.52E-95 | 13 Noa1    |
| 4.13E-97 | 1.119010208 | 0.859 | 0.216 | 5.45E-93 | 13 Metap2  |
| 1.14E-96 | 0.79819273  | 0.452 | 0.057 | 1.51E-92 | 13 Pfas    |
| 1.32E-96 | 0.63731643  | 0.442 | 0.054 | 1.74E-92 | 13 Eef1e1  |
| 2.03E-96 | 0.894962427 | 0.558 | 0.087 | 2.68E-92 | 13 Nop56   |
| 3.25E-96 | 1.070588359 | 0.734 | 0.153 | 4.29E-92 | 13 Ddx21   |
| 4.49E-95 | 0.908237625 | 0.302 | 0.026 | 5.92E-91 | 13 Fn3krp  |
| 9.63E-95 | 1.262190928 | 0.975 | 0.541 | 1.27E-90 | 13 Rps2    |
| 7.20E-93 | 0.699169348 | 0.382 | 0.043 | 9.50E-89 | 13 Nolc1   |
| 9.00E-93 | 0.65480802  | 0.377 | 0.042 | 1.19E-88 | 13 Gar1    |
| 2.97E-91 | 0.640279023 | 0.266 | 0.021 | 3.92E-87 | 13 Slc16a1 |
| 2.73E-90 | 0.787718237 | 0.553 | 0.089 | 3.60E-86 | 13 Hspa9   |
| 5.08E-90 | 0.552319019 | 0.302 | 0.027 | 6.70E-86 | 13 Phf10   |
| 8.12E-90 | 0.709665857 | 0.437 | 0.057 | 1.07E-85 | 13 Tcf3    |
| 1.81E-89 | 0.841924379 | 0.603 | 0.105 | 2.39E-85 | 13 Vamp5   |
| 1.13E-88 | 0.594920859 | 0.352 | 0.038 | 1.49E-84 | 13 Mospd3  |
| 2.84E-88 | 0.759651449 | 0.528 | 0.083 | 3.75E-84 | 13 Pa2g4   |
| 2.15E-87 | 0.7658948   | 0.523 | 0.082 | 2.83E-83 | 13 Mrpl12  |
| 4.27E-86 | 0.79633224  | 1     | 0.954 | 5.63E-82 | 13 Rpl41   |
| 5.26E-86 | 0.791466746 | 0.603 | 0.108 | 6.93E-82 | 13 Pebp1   |
| 2.85E-84 | 0.677882531 | 0.462 | 0.067 | 3.76E-80 | 13 Knop1   |
| 2.98E-84 | 0.619877798 | 0.266 | 0.023 | 3.92E-80 | 13 Orc2    |
| 4.03E-84 | 0.597380169 | 0.397 | 0.05  | 5.31E-80 | 13 Ugcg    |
| 1.78E-83 | 0.53646108  | 0.352 | 0.04  | 2.35E-79 | 13 Pdcd11  |
| 1.11E-82 | 0.699646663 | 0.513 | 0.082 | 1.46E-78 | 13 Cfdp1   |
| 1.23E-82 | 0.720711654 | 0.563 | 0.097 | 1.62E-78 | 13 Phb2    |
| 4.64E-82 | 1.047498031 | 0.884 | 0.265 | 6.12E-78 | 13 Eef1g   |
| 1.97E-81 | 0.824032491 | 0.658 | 0.133 | 2.59E-77 | 13 Nhp2    |
| 1.06E-80 | 1.059981396 | 0.794 | 0.211 | 1.40E-76 | 13 Hspe1   |
| 3.69E-80 | 0.651076298 | 0.528 | 0.087 | 4.86E-76 | 13 Tnfaip2 |

|          |             |       |       |          |            |
|----------|-------------|-------|-------|----------|------------|
| 3.29E-79 | 1.101080372 | 0.869 | 0.297 | 4.34E-75 | 13 Atp5g1  |
| 9.68E-79 | 0.463012464 | 0.276 | 0.026 | 1.28E-74 | 13 Hsph1   |
| 3.31E-78 | 0.710313046 | 0.427 | 0.062 | 4.37E-74 | 13 Pole3   |
| 1.21E-77 | 0.9525319   | 0.98  | 0.715 | 1.60E-73 | 13 Rplp1   |
| 1.88E-77 | 0.547096954 | 0.291 | 0.03  | 2.48E-73 | 13 E2f4    |
| 7.08E-76 | 0.688110446 | 0.442 | 0.067 | 9.34E-72 | 13 Svbp    |
| 1.45E-75 | 0.896256935 | 0.724 | 0.169 | 1.92E-71 | 13 Tmem14c |
| 2.48E-75 | 1.097734517 | 0.905 | 0.324 | 3.27E-71 | 13 Set     |
| 2.88E-75 | 0.560323565 | 0.322 | 0.037 | 3.80E-71 | 13 Dkc1    |
| 7.76E-75 | 0.658402862 | 0.457 | 0.072 | 1.02E-70 | 13 Lyar    |
| 1.21E-74 | 0.535704407 | 0.296 | 0.032 | 1.60E-70 | 13 Ruvbl1  |
| 1.89E-74 | 0.961045687 | 1     | 0.648 | 2.49E-70 | 13 Rps12   |
| 2.94E-74 | 0.597704429 | 0.307 | 0.035 | 3.88E-70 | 13 Nsun2   |
| 3.00E-74 | 0.940408029 | 0.99  | 0.676 | 3.96E-70 | 13 Rpl14   |
| 3.06E-74 | 0.484825541 | 0.276 | 0.028 | 4.03E-70 | 13 Ddx1    |
| 1.63E-73 | 1.110910316 | 0.935 | 0.435 | 2.15E-69 | 13 Atpif1  |
| 5.52E-73 | 0.430412679 | 0.266 | 0.026 | 7.28E-69 | 13 Gpatch4 |
| 1.13E-72 | 0.60690252  | 0.387 | 0.055 | 1.50E-68 | 13 Srm     |
| 9.61E-72 | 0.916252394 | 0.985 | 0.702 | 1.27E-67 | 13 Rplp0   |
| 1.53E-71 | 0.959374421 | 0.99  | 0.468 | 2.02E-67 | 13 Rpl12   |
| 3.32E-71 | 0.692910168 | 0.457 | 0.075 | 4.38E-67 | 13 Aplp2   |
| 3.50E-71 | 0.936012582 | 0.523 | 0.101 | 4.62E-67 | 13 Khgrp   |
| 5.00E-71 | 0.820964068 | 0.598 | 0.125 | 6.60E-67 | 13 Snhg9   |
| 6.43E-71 | 0.532763537 | 0.302 | 0.035 | 8.48E-67 | 13 Scoc    |
| 1.02E-70 | 0.622303222 | 0.417 | 0.064 | 1.35E-66 | 13 Nifk    |
| 1.37E-70 | 0.663875997 | 0.508 | 0.091 | 1.80E-66 | 13 Ppm1g   |
| 3.00E-70 | 0.560354029 | 0.633 | 0.13  | 3.95E-66 | 13 Bcl11a  |
| 5.41E-70 | 0.780699581 | 0.467 | 0.081 | 7.13E-66 | 13 Tmem245 |
| 8.13E-70 | 0.822775996 | 0.623 | 0.137 | 1.07E-65 | 13 Comt    |
| 3.38E-69 | 0.668109962 | 0.487 | 0.086 | 4.46E-65 | 13 Phf5a   |
| 4.50E-69 | 0.647736507 | 0.588 | 0.119 | 5.93E-65 | 13 Zfos1   |

|          |             |       |       |          |              |
|----------|-------------|-------|-------|----------|--------------|
| 5.57E-68 | 0.464607951 | 0.256 | 0.026 | 7.34E-64 | 13 Nudt19    |
| 5.63E-68 | 0.656831106 | 0.563 | 0.112 | 7.43E-64 | 13 Cbx5      |
| 9.16E-68 | 0.649911781 | 0.457 | 0.079 | 1.21E-63 | 13 Mrps36    |
| 3.06E-67 | 0.650353328 | 0.372 | 0.054 | 4.04E-63 | 13 Ssbp3     |
| 5.24E-67 | 0.965475866 | 0.935 | 0.424 | 6.91E-63 | 13 Gm10073   |
| 7.08E-67 | 0.481178764 | 0.347 | 0.048 | 9.33E-63 | 13 Timm44    |
| 1.09E-66 | 0.644098824 | 0.548 | 0.109 | 1.44E-62 | 13 Abcf1     |
| 1.12E-66 | 0.626718673 | 0.417 | 0.068 | 1.48E-62 | 13 Sfxn1     |
| 1.78E-66 | 0.986540448 | 0.935 | 0.442 | 2.35E-62 | 13 Rps12-ps3 |
| 1.89E-66 | 0.539786825 | 0.332 | 0.044 | 2.50E-62 | 13 Ap1b1     |
| 5.35E-66 | 0.81807426  | 0.98  | 0.746 | 7.05E-62 | 13 Gm10076   |
| 1.38E-65 | 0.558323857 | 0.447 | 0.077 | 1.82E-61 | 13 Impdh2    |
| 1.65E-65 | 0.663191479 | 0.492 | 0.092 | 2.18E-61 | 13 Mcm7      |
| 3.96E-65 | 0.882051989 | 0.261 | 0.029 | 5.23E-61 | 13 Loxl2     |
| 4.10E-65 | 0.581954954 | 0.392 | 0.061 | 5.41E-61 | 13 Ngfrap1   |
| 4.15E-65 | 0.55575618  | 0.352 | 0.05  | 5.47E-61 | 13 Tlk1      |
| 6.14E-65 | 0.990864178 | 0.925 | 0.412 | 8.10E-61 | 13 Serbp1    |
| 1.03E-64 | 0.905164762 | 0.955 | 0.455 | 1.36E-60 | 13 Rpl29     |
| 1.04E-64 | 0.582109873 | 0.327 | 0.044 | 1.38E-60 | 13 Myc       |
| 6.00E-64 | 0.748797815 | 1     | 0.831 | 7.91E-60 | 13 Rps8      |
| 7.39E-64 | 0.722939553 | 0.643 | 0.151 | 9.75E-60 | 13 Tomm5     |
| 8.94E-64 | 0.74559949  | 0.693 | 0.172 | 1.18E-59 | 13 Eif3j1    |
| 5.57E-63 | 0.720421925 | 0.995 | 0.831 | 7.35E-59 | 13 Rps18     |
| 3.89E-62 | 0.528447169 | 0.307 | 0.041 | 5.13E-58 | 13 Fen1      |
| 1.26E-61 | 0.718088556 | 0.266 | 0.032 | 1.67E-57 | 13 Gm13075   |
| 1.81E-61 | 0.782203344 | 0.633 | 0.154 | 2.39E-57 | 13 Tomm20    |
| 2.04E-61 | 0.505832908 | 0.437 | 0.077 | 2.69E-57 | 13 Ddx46     |
| 3.72E-61 | 0.820442325 | 0.749 | 0.21  | 4.91E-57 | 13 Nme1      |
| 6.85E-61 | 0.474967022 | 0.317 | 0.044 | 9.03E-57 | 13 Alkbh1    |
| 9.07E-61 | 0.451406729 | 0.281 | 0.035 | 1.20E-56 | 13 Ndufaf4   |
| 1.06E-60 | 0.466634537 | 0.291 | 0.038 | 1.39E-56 | 13 Tomm40    |

|          |              |       |       |          |            |
|----------|--------------|-------|-------|----------|------------|
| 1.41E-60 | 0.904978512  | 0.925 | 0.455 | 1.86E-56 | 13 Gm8730  |
| 3.92E-60 | 0.859068424  | 0.749 | 0.218 | 5.17E-56 | 13 Usp50   |
| 6.24E-60 | 0.484219325  | 0.302 | 0.04  | 8.23E-56 | 13 Ube2m   |
| 9.83E-60 | 0.715377378  | 0.337 | 0.052 | 1.30E-55 | 13 Hbb-bt  |
| 2.52E-59 | 0.607104346  | 0.422 | 0.076 | 3.33E-55 | 13 Nedd4   |
| 6.53E-59 | 0.986985496  | 0.869 | 0.367 | 8.62E-55 | 13 Npm1    |
| 1.02E-58 | 0.686523492  | 0.99  | 0.854 | 1.35E-54 | 13 Rpl35   |
| 1.26E-58 | 0.766346764  | 0.99  | 0.758 | 1.66E-54 | 13 Rpl36   |
| 1.65E-58 | 0.683887406  | 0.563 | 0.127 | 2.18E-54 | 13 Dtymk   |
| 2.74E-58 | 0.52139999   | 0.508 | 0.104 | 3.61E-54 | 13 Rexo2   |
| 4.50E-58 | 0.769708419  | 0.397 | 0.07  | 5.94E-54 | 13 Exosc2  |
| 6.42E-58 | 0.53757581   | 0.362 | 0.059 | 8.47E-54 | 13 Fam162a |
| 1.00E-57 | 0.475886582  | 0.327 | 0.049 | 1.32E-53 | 13 Rsl1d1  |
| 1.09E-57 | 0.525972572  | 0.271 | 0.035 | 1.43E-53 | 13 Wdr12   |
| 1.11E-57 | 0.567192052  | 0.412 | 0.074 | 1.47E-53 | 13 Psm7    |
| 1.74E-57 | 0.521501251  | 0.276 | 0.036 | 2.30E-53 | 13 Gclc    |
| 4.29E-57 | 0.70205649   | 0.628 | 0.155 | 5.66E-53 | 13 Prpf4b  |
| 7.46E-57 | 0.402651886  | 0.437 | 0.088 | 9.84E-53 | 13 Hbb-bs  |
| 8.94E-57 | -1.929801013 | 0.894 | 0.906 | 1.18E-52 | 13 Lyz2    |
| 1.02E-56 | 0.859022367  | 0.874 | 0.318 | 1.34E-52 | 13 Hnrnpa1 |
| 3.66E-56 | 0.477831763  | 0.367 | 0.061 | 4.83E-52 | 13 Acp1    |
| 3.78E-56 | 0.473041158  | 0.286 | 0.039 | 4.99E-52 | 13 Gm6576  |
| 6.78E-56 | 0.42942333   | 0.271 | 0.035 | 8.94E-52 | 13 Ddx27   |
| 1.08E-55 | 0.543629806  | 0.412 | 0.076 | 1.42E-51 | 13 Fkbp4   |
| 1.68E-55 | 0.471856709  | 0.286 | 0.04  | 2.22E-51 | 13 Josd2   |
| 2.09E-55 | 0.688313021  | 0.995 | 0.805 | 2.75E-51 | 13 Rps23   |
| 2.27E-55 | 0.665736571  | 0.995 | 0.803 | 2.99E-51 | 13 Rpl13a  |
| 2.28E-55 | 0.414408777  | 0.412 | 0.074 | 3.00E-51 | 13 Tspan13 |
| 5.08E-55 | 0.695956229  | 0.628 | 0.158 | 6.70E-51 | 13 Cenpa   |
| 5.79E-55 | 0.589575993  | 0.472 | 0.097 | 7.63E-51 | 13 Psip1   |
| 7.96E-55 | 0.640858984  | 0.397 | 0.073 | 1.05E-50 | 13 Rrm1    |

|          |             |       |       |          |                  |
|----------|-------------|-------|-------|----------|------------------|
| 9.69E-55 | 0.646226653 | 0.995 | 0.847 | 1.28E-50 | 13 Rpl13         |
| 1.18E-54 | 0.495310912 | 0.452 | 0.089 | 1.56E-50 | 13 Gspt1         |
| 1.42E-54 | 0.442745445 | 0.312 | 0.047 | 1.88E-50 | 13 Nenf          |
| 1.76E-54 | 0.676219379 | 0.503 | 0.11  | 2.32E-50 | 13 Eif2s3x       |
| 2.01E-54 | 0.664440653 | 0.638 | 0.165 | 2.65E-50 | 13 Hypk          |
| 2.68E-54 | 0.381003422 | 0.307 | 0.045 | 3.53E-50 | 13 Acsl5         |
| 3.03E-54 | 0.776456507 | 0.965 | 0.632 | 3.99E-50 | 13 Fth1          |
| 4.05E-54 | 0.483165363 | 0.276 | 0.038 | 5.34E-50 | 13 Eprs          |
| 4.42E-54 | 0.602780481 | 0.995 | 0.899 | 5.83E-50 | 13 Rpl37         |
| 1.42E-53 | 0.722092896 | 0.754 | 0.224 | 1.87E-49 | 13 Eif5b         |
| 1.51E-53 | 0.749412068 | 0.97  | 0.637 | 1.99E-49 | 13 Rpl8          |
| 1.66E-53 | 0.895863203 | 0.829 | 0.31  | 2.19E-49 | 13 Hsp90aa1      |
| 3.59E-53 | 0.379587369 | 0.256 | 0.033 | 4.73E-49 | 13 Fdx1l         |
| 3.76E-53 | 0.521379958 | 0.327 | 0.052 | 4.96E-49 | 13 Nudt5         |
| 5.25E-53 | 0.450954241 | 0.312 | 0.048 | 6.92E-49 | 13 Oat           |
| 6.91E-53 | 0.441783867 | 0.357 | 0.061 | 9.12E-49 | 13 Larp1         |
| 8.44E-53 | 0.618031925 | 0.598 | 0.149 | 1.11E-48 | 13 Nhp2l1        |
| 8.97E-53 | -1.6017693  | 0.648 | 0.82  | 1.18E-48 | 13 Tyrobp        |
| 1.42E-52 | 0.475243606 | 0.256 | 0.034 | 1.88E-48 | 13 1190007l07Rik |
| 2.00E-52 | 0.517399146 | 0.382 | 0.07  | 2.63E-48 | 13 Mrps28        |
| 2.44E-52 | 0.466622944 | 0.251 | 0.033 | 3.22E-48 | 13 Vkorc1l1      |
| 3.17E-52 | 0.6894447   | 0.99  | 0.716 | 4.18E-48 | 13 Rps26         |
| 4.26E-52 | 0.473924493 | 0.307 | 0.047 | 5.62E-48 | 13 Cpsf2         |
| 7.46E-52 | 0.426675089 | 0.332 | 0.054 | 9.84E-48 | 13 Rcor1         |
| 7.68E-52 | 0.535124425 | 0.492 | 0.107 | 1.01E-47 | 13 Wapl          |
| 8.45E-52 | 0.63377095  | 0.578 | 0.144 | 1.11E-47 | 13 Cdk6          |
| 9.34E-52 | 0.500334901 | 0.497 | 0.108 | 1.23E-47 | 13 Ssrp1         |
| 1.72E-51 | 0.752116746 | 0.98  | 0.633 | 2.28E-47 | 13 Rpl36a        |
| 2.35E-51 | 0.798080253 | 0.618 | 0.17  | 3.09E-47 | 13 Erdr1         |
| 2.55E-51 | 0.579940019 | 0.623 | 0.159 | 3.36E-47 | 13 Srrm1         |
| 2.73E-51 | 0.515016114 | 0.357 | 0.063 | 3.61E-47 | 13 Immt          |

|          |              |       |       |          |             |
|----------|--------------|-------|-------|----------|-------------|
| 5.03E-51 | 0.638550298  | 0.99  | 0.863 | 6.63E-47 | 13 Rpl32    |
| 7.61E-51 | 0.442759882  | 0.382 | 0.07  | 1.00E-46 | 13 Lgals9   |
| 1.38E-50 | 0.451557848  | 0.372 | 0.068 | 1.82E-46 | 13 Ubtf     |
| 1.68E-50 | 0.457062083  | 0.291 | 0.044 | 2.22E-46 | 13 Guk1     |
| 1.91E-50 | 0.556869772  | 0.427 | 0.087 | 2.52E-46 | 13 Kcnq1ot1 |
| 2.51E-50 | 0.392426571  | 0.276 | 0.04  | 3.31E-46 | 13 BC003965 |
| 2.58E-50 | 0.645800469  | 0.99  | 0.771 | 3.41E-46 | 13 Rplp2    |
| 2.61E-50 | 0.64178618   | 0.99  | 0.774 | 3.44E-46 | 13 Rpl26    |
| 2.62E-50 | 0.691004245  | 0.98  | 0.674 | 3.46E-46 | 13 Rpsa     |
| 3.46E-50 | 0.511638715  | 0.347 | 0.061 | 4.56E-46 | 13 Prdx3    |
| 3.70E-50 | 0.522361127  | 0.477 | 0.104 | 4.88E-46 | 13 Eif4ebp1 |
| 6.95E-50 | 0.511579211  | 0.492 | 0.11  | 9.16E-46 | 13 Bag1     |
| 8.73E-50 | 0.442210333  | 0.266 | 0.038 | 1.15E-45 | 13 Unc13d   |
| 9.51E-50 | 0.391395861  | 0.256 | 0.036 | 1.25E-45 | 13 Suclg2   |
| 1.98E-49 | 0.500975329  | 0.407 | 0.081 | 2.61E-45 | 13 Wdr61    |
| 2.22E-49 | 0.574876006  | 0.513 | 0.12  | 2.93E-45 | 13 Lsm7     |
| 2.80E-49 | 0.636887068  | 0.482 | 0.11  | 3.70E-45 | 13 Lsm2     |
| 4.58E-49 | 0.586953301  | 0.628 | 0.167 | 6.05E-45 | 13 Myb      |
| 4.90E-49 | 0.827016413  | 0.92  | 0.418 | 6.47E-45 | 13 Ybx1     |
| 5.22E-49 | 0.644726239  | 0.347 | 0.062 | 6.88E-45 | 13 Parp1    |
| 7.78E-49 | 0.427854694  | 0.256 | 0.036 | 1.03E-44 | 13 Nfix     |
| 1.69E-48 | -1.844382732 | 0.412 | 0.74  | 2.23E-44 | 13 Cd52     |
| 2.32E-48 | 0.45195295   | 0.302 | 0.049 | 3.06E-44 | 13 Amd1     |
| 2.48E-48 | 0.400205772  | 0.281 | 0.043 | 3.28E-44 | 13 Timm17a  |
| 2.69E-48 | 0.463361062  | 0.322 | 0.055 | 3.54E-44 | 13 Bccip    |
| 2.83E-48 | 0.503496085  | 0.437 | 0.092 | 3.73E-44 | 13 Rpia     |
| 6.23E-48 | 0.539536791  | 0.357 | 0.067 | 8.22E-44 | 13 Cct3     |
| 9.43E-48 | 0.412274011  | 0.276 | 0.042 | 1.24E-43 | 13 Mak16    |
| 1.03E-47 | 0.57127501   | 0.583 | 0.152 | 1.36E-43 | 13 G3bp1    |
| 2.19E-47 | 0.533116142  | 0.422 | 0.088 | 2.89E-43 | 13 Hdac2    |
| 3.08E-47 | 0.640813791  | 0.814 | 0.278 | 4.06E-43 | 13 Pdcd4    |

|          |             |       |       |          |                  |
|----------|-------------|-------|-------|----------|------------------|
| 3.91E-47 | 0.717165943 | 0.94  | 0.653 | 5.16E-43 | 13 Rps20         |
| 4.15E-47 | 0.457588979 | 0.276 | 0.043 | 5.47E-43 | 13 Mybbp1a       |
| 4.99E-47 | 0.657235105 | 0.729 | 0.222 | 6.58E-43 | 13 Ptges3        |
| 5.29E-47 | 0.540633313 | 0.508 | 0.122 | 6.98E-43 | 13 1110004F10Rik |
| 5.43E-47 | 0.545000474 | 0.427 | 0.092 | 7.17E-43 | 13 Mrpl36        |
| 6.05E-47 | 0.43542364  | 0.276 | 0.043 | 7.98E-43 | 13 Zfp800        |
| 7.85E-47 | 0.743408196 | 0.764 | 0.266 | 1.04E-42 | 13 Hnrnpab       |
| 1.25E-46 | 0.505556476 | 0.387 | 0.078 | 1.64E-42 | 13 Psm11         |
| 1.31E-46 | 0.524919117 | 1     | 0.936 | 1.73E-42 | 13 Rpl37a        |
| 1.39E-46 | 0.570773213 | 0.623 | 0.169 | 1.84E-42 | 13 Bsg           |
| 1.47E-46 | 0.44116675  | 0.271 | 0.042 | 1.93E-42 | 13 RP23-4H17.3   |
| 1.52E-46 | 0.58964708  | 0.598 | 0.161 | 2.00E-42 | 13 Ndufab1       |
| 1.55E-46 | 0.765108447 | 0.683 | 0.21  | 2.04E-42 | 13 Rpgr1         |
| 1.85E-46 | 0.700919826 | 0.834 | 0.287 | 2.44E-42 | 13 mt-Nd2        |
| 2.15E-46 | 0.685781163 | 0.704 | 0.217 | 2.84E-42 | 13 Mif           |
| 2.69E-46 | 0.468448973 | 0.357 | 0.068 | 3.55E-42 | 13 Gm16286       |
| 5.31E-46 | 0.780272003 | 0.824 | 0.321 | 7.00E-42 | 13 Nop10         |
| 6.98E-46 | 0.567773457 | 0.412 | 0.088 | 9.21E-42 | 13 Eif4b         |
| 7.36E-46 | 0.470278231 | 0.533 | 0.131 | 9.71E-42 | 13 Lmo2          |
| 1.26E-45 | 0.468714954 | 0.347 | 0.065 | 1.66E-41 | 13 Ddx18         |
| 1.36E-45 | 0.366611276 | 0.251 | 0.037 | 1.80E-41 | 13 Chchd4        |
| 2.10E-45 | 0.472435535 | 0.377 | 0.076 | 2.76E-41 | 13 Gm10260       |
| 2.97E-45 | 0.508023844 | 0.497 | 0.12  | 3.92E-41 | 13 Dnajc19       |
| 3.57E-45 | 0.46727004  | 0.397 | 0.083 | 4.70E-41 | 13 Txn2          |
| 6.17E-45 | 0.436527943 | 0.462 | 0.105 | 8.13E-41 | 13 Eif4g1        |
| 1.42E-44 | 0.69105757  | 0.97  | 0.563 | 1.87E-40 | 13 Rpl10a        |
| 1.57E-44 | 0.401828858 | 0.291 | 0.049 | 2.07E-40 | 13 Eif2s1        |
| 2.18E-44 | 0.647834034 | 0.985 | 0.734 | 2.88E-40 | 13 Rpl23         |
| 2.50E-44 | 0.630039743 | 0.985 | 0.713 | 3.30E-40 | 13 Rpl27a        |
| 2.73E-44 | 0.430775367 | 0.322 | 0.059 | 3.61E-40 | 13 Aars          |
| 2.86E-44 | 0.38896989  | 0.327 | 0.06  | 3.77E-40 | 13 Ipo5          |

|          |             |       |       |          |               |
|----------|-------------|-------|-------|----------|---------------|
| 6.23E-44 | 0.437934208 | 0.332 | 0.062 | 8.22E-40 | 13 Rif1       |
| 6.64E-44 | 0.507554812 | 0.467 | 0.111 | 8.75E-40 | 13 Wbp5       |
| 7.67E-44 | 0.549866665 | 0.442 | 0.103 | 1.01E-39 | 13 Gadd45gip1 |
| 8.38E-44 | 0.34032129  | 0.281 | 0.046 | 1.11E-39 | 13 Msi2       |
| 1.43E-43 | 0.360271422 | 0.317 | 0.057 | 1.89E-39 | 13 Cdc34      |
| 1.44E-43 | 0.379964424 | 0.256 | 0.04  | 1.90E-39 | 13 Cul5       |
| 1.94E-43 | 0.655364855 | 0.734 | 0.238 | 2.56E-39 | 13 Eif3a      |
| 2.12E-43 | 0.554773579 | 1     | 0.893 | 2.80E-39 | 13 Rps19      |
| 3.26E-43 | 0.625943126 | 0.628 | 0.185 | 4.30E-39 | 13 Gm10020    |
| 3.89E-43 | 0.738137529 | 0.91  | 0.436 | 5.12E-39 | 13 Uqcr11     |
| 4.18E-43 | 0.667930382 | 0.975 | 0.578 | 5.52E-39 | 13 Rpl4       |
| 4.94E-43 | 0.469967111 | 0.432 | 0.098 | 6.52E-39 | 13 Cdv3       |
| 5.60E-43 | 0.686914918 | 0.799 | 0.29  | 7.39E-39 | 13 Polr2l     |
| 8.60E-43 | 0.700040082 | 0.95  | 0.567 | 1.13E-38 | 13 Rpl15      |
| 1.09E-42 | 0.399685045 | 0.312 | 0.056 | 1.44E-38 | 13 Rad23a     |
| 1.69E-42 | 0.745965771 | 0.91  | 0.38  | 2.23E-38 | 13 mt-Atp8    |
| 1.92E-42 | 0.632441476 | 0.829 | 0.301 | 2.53E-38 | 13 Eef1b2     |
| 3.42E-42 | 0.365328728 | 0.276 | 0.046 | 4.51E-38 | 13 Cir1       |
| 3.43E-42 | 0.442043974 | 0.417 | 0.093 | 4.53E-38 | 13 Wbp11      |
| 4.65E-42 | 0.57491138  | 0.593 | 0.169 | 6.14E-38 | 13 Tubb4b     |
| 6.09E-42 | 0.379053798 | 0.332 | 0.064 | 8.04E-38 | 13 Zc3h13     |
| 6.49E-42 | 0.731072414 | 0.764 | 0.287 | 8.57E-38 | 13 Erh        |
| 6.91E-42 | 0.805003315 | 0.925 | 0.495 | 9.12E-38 | 13 Cbx3       |
| 7.93E-42 | 0.372723101 | 0.251 | 0.04  | 1.05E-37 | 13 Sf3b4      |
| 9.55E-42 | 0.752770533 | 0.487 | 0.131 | 1.26E-37 | 13 Hist1h1b   |
| 9.59E-42 | 0.441136994 | 0.367 | 0.076 | 1.27E-37 | 13 Topbp1     |
| 9.78E-42 | 0.482525211 | 0.482 | 0.12  | 1.29E-37 | 13 Polr2f     |
| 2.66E-41 | 0.53507097  | 0.583 | 0.165 | 3.51E-37 | 13 Smarca5    |
| 2.95E-41 | 0.416637799 | 0.291 | 0.052 | 3.89E-37 | 13 Prkar2b    |
| 6.05E-41 | 0.412669375 | 0.563 | 0.15  | 7.98E-37 | 13 Sepw1      |
| 6.89E-41 | 0.427058087 | 0.342 | 0.069 | 9.09E-37 | 13 Nasp       |



|          |             |       |       |          |           |
|----------|-------------|-------|-------|----------|-----------|
| 1.20E-40 | 0.523469129 | 0.583 | 0.165 | 1.58E-36 | 13 Srsf10 |
| 1.27E-40 | 0.488135477 | 0.422 | 0.099 | 1.67E-36 | 13 Tsn    |
| 1.35E-40 | 0.432449069 | 0.427 | 0.1   | 1.78E-36 | 13 Eif1ax |
| 1.43E-40 | 0.360217217 | 0.377 | 0.08  | 1.89E-36 | 13 Cyc1   |
| 1.53E-40 | 0.578693355 | 0.975 | 0.737 | 2.01E-36 | 13 Rpl24  |
| 1.72E-40 | 0.536165665 | 0.382 | 0.085 | 2.26E-36 | 13 Cdk4   |
| 1.80E-40 | 0.48169319  | 0.442 | 0.107 | 2.37E-36 | 13 Gatm   |
| 2.06E-40 | 0.669332745 | 0.94  | 0.597 | 2.72E-36 | 13 Rps21  |
| 2.09E-40 | 0.673752992 | 0.849 | 0.341 | 2.76E-36 | 13 Snrpf  |
| 2.69E-40 | 0.475481528 | 0.417 | 0.097 | 3.54E-36 | 13 Mrpl34 |
| 3.06E-40 | 0.488987762 | 0.271 | 0.048 | 4.04E-36 | 13 Psme3  |
| 3.26E-40 | 0.424791315 | 0.362 | 0.076 | 4.30E-36 | 13 Sod2   |
| 4.80E-40 | 0.424847786 | 0.322 | 0.063 | 6.33E-36 | 13 Trim28 |
| 5.32E-40 | 0.449850618 | 0.543 | 0.147 | 7.02E-36 | 13 Tardbp |
| 6.92E-40 | 0.41160777  | 0.296 | 0.055 | 9.13E-36 | 13 Vars   |
| 8.87E-40 | 0.38948789  | 0.251 | 0.041 | 1.17E-35 | 13 Nt5c3  |
| 9.01E-40 | 0.620437117 | 0.985 | 0.713 | 1.19E-35 | 13 Rps17  |
| 9.32E-40 | 0.608778954 | 0.538 | 0.151 | 1.23E-35 | 13 Lig1   |
| 1.05E-39 | 0.335003301 | 0.322 | 0.063 | 1.38E-35 | 13 Rbm26  |
| 1.08E-39 | 0.783321856 | 0.96  | 0.609 | 1.43E-35 | 13 mt-Nd1 |
| 1.15E-39 | 0.473419851 | 0.417 | 0.099 | 1.51E-35 | 13 Cacybp |
| 1.16E-39 | 0.474074969 | 0.342 | 0.071 | 1.53E-35 | 13 Trp53  |
| 1.22E-39 | 0.404976487 | 0.387 | 0.086 | 1.61E-35 | 13 Drap1  |
| 1.28E-39 | 0.475214098 | 0.276 | 0.049 | 1.69E-35 | 13 Wdhd1  |
| 1.41E-39 | 0.646910713 | 0.593 | 0.182 | 1.86E-35 | 13 St13   |
| 1.59E-39 | 0.422286967 | 0.442 | 0.107 | 2.09E-35 | 13 Eif3i  |
| 1.61E-39 | 0.471404315 | 0.432 | 0.104 | 2.12E-35 | 13 Naa15  |
| 2.47E-39 | 0.531614617 | 0.492 | 0.131 | 3.25E-35 | 13 Npm3   |
| 2.78E-39 | 0.472601658 | 0.387 | 0.088 | 3.66E-35 | 13 Txnl1  |
| 2.80E-39 | 0.501692726 | 0.563 | 0.161 | 3.69E-35 | 13 Rdx    |
| 2.98E-39 | 0.507564162 | 0.538 | 0.149 | 3.93E-35 | 13 Banf1  |

|          |              |       |       |          |                  |
|----------|--------------|-------|-------|----------|------------------|
| 4.11E-39 | 0.674291783  | 0.879 | 0.388 | 5.42E-35 | 13 Rpl36-ps3     |
| 5.46E-39 | 0.550116451  | 0.99  | 0.77  | 7.20E-35 | 13 Rpl39         |
| 5.53E-39 | 0.490401161  | 0.503 | 0.133 | 7.29E-35 | 13 Mat2a         |
| 7.06E-39 | 0.613325029  | 0.97  | 0.666 | 9.32E-35 | 13 Gm2000        |
| 7.32E-39 | 0.660713343  | 0.774 | 0.29  | 9.66E-35 | 13 Hnrnpm        |
| 7.84E-39 | 0.46528564   | 0.347 | 0.074 | 1.03E-34 | 13 1810022K09Rik |
| 7.96E-39 | 0.393881901  | 0.372 | 0.082 | 1.05E-34 | 13 Taf10         |
| 8.83E-39 | 0.501879578  | 0.457 | 0.116 | 1.16E-34 | 13 Bclaf1        |
| 1.06E-38 | 0.517329489  | 0.442 | 0.112 | 1.40E-34 | 13 Rnps1         |
| 1.09E-38 | 0.557836701  | 0.995 | 0.739 | 1.43E-34 | 13 Rps6          |
| 1.31E-38 | -1.602401345 | 0.417 | 0.693 | 1.72E-34 | 13 Cyba          |
| 2.15E-38 | 0.438986871  | 0.503 | 0.134 | 2.84E-34 | 13 Rpl7a-ps5     |
| 2.21E-38 | 0.431583727  | 0.312 | 0.062 | 2.91E-34 | 13 Hcfc1         |
| 3.91E-38 | 0.641762743  | 0.93  | 0.461 | 5.15E-34 | 13 Rps26-ps1     |
| 4.00E-38 | 0.321791297  | 0.307 | 0.06  | 5.27E-34 | 13 Smap2         |
| 4.23E-38 | 0.413693679  | 0.397 | 0.093 | 5.58E-34 | 13 Denr          |
| 4.84E-38 | 0.415326246  | 0.352 | 0.076 | 6.39E-34 | 13 Cebpz         |
| 4.87E-38 | 0.4165196    | 0.387 | 0.089 | 6.43E-34 | 13 Rbbp7         |
| 5.14E-38 | 0.584906217  | 0.975 | 0.701 | 6.78E-34 | 13 Rpl28         |
| 6.00E-38 | 0.489814413  | 0.523 | 0.145 | 7.92E-34 | 13 Emg1          |
| 6.92E-38 | 0.457526796  | 0.437 | 0.109 | 9.12E-34 | 13 Tipin         |
| 9.16E-38 | 0.672896078  | 0.849 | 0.363 | 1.21E-33 | 13 Eif5a         |
| 1.13E-37 | 0.482930847  | 0.472 | 0.124 | 1.49E-33 | 13 Rsl24d1       |
| 1.57E-37 | 0.602751772  | 0.965 | 0.714 | 2.07E-33 | 13 Rpl6          |
| 1.71E-37 | 0.570126211  | 0.975 | 0.779 | 2.26E-33 | 13 Rps5          |
| 1.93E-37 | 0.43531912   | 0.442 | 0.112 | 2.55E-33 | 13 Snrnp70       |
| 2.00E-37 | 0.388385835  | 0.377 | 0.086 | 2.64E-33 | 13 Rcc2          |
| 2.12E-37 | 0.349359581  | 0.377 | 0.085 | 2.79E-33 | 13 Vdac1         |
| 2.34E-37 | 0.714330125  | 0.854 | 0.405 | 3.09E-33 | 13 Hsp90ab1      |
| 2.37E-37 | 0.577676231  | 0.764 | 0.268 | 3.12E-33 | 13 Gm10269       |
| 2.43E-37 | 0.489481171  | 0.618 | 0.19  | 3.20E-33 | 13 Srsf7         |

|          |              |       |       |          |                  |
|----------|--------------|-------|-------|----------|------------------|
| 3.08E-37 | 0.431868725  | 0.266 | 0.049 | 4.07E-33 | 13 Kit           |
| 3.14E-37 | -1.505774433 | 0.523 | 0.72  | 4.14E-33 | 13 Fcer1g        |
| 3.14E-37 | 0.363607858  | 0.397 | 0.094 | 4.14E-33 | 13 Sumo3         |
| 3.99E-37 | 0.349925351  | 0.322 | 0.066 | 5.27E-33 | 13 Mrpl41        |
| 4.13E-37 | 0.672523592  | 0.894 | 0.464 | 5.44E-33 | 13 Rps27l        |
| 4.13E-37 | 0.291414881  | 0.312 | 0.062 | 5.45E-33 | 13 Sars          |
| 6.62E-37 | 0.387701017  | 0.482 | 0.127 | 8.74E-33 | 13 Top2b         |
| 6.81E-37 | 0.768831965  | 0.583 | 0.191 | 8.98E-33 | 13 Supt16        |
| 7.14E-37 | 0.360258226  | 0.296 | 0.058 | 9.42E-33 | 13 Snhg6         |
| 7.19E-37 | 0.552487094  | 0.518 | 0.145 | 9.48E-33 | 13 Dpy30         |
| 7.33E-37 | 0.397854172  | 0.327 | 0.069 | 9.67E-33 | 13 Eif4e2        |
| 7.43E-37 | 0.446680968  | 0.508 | 0.14  | 9.80E-33 | 13 Mrps24        |
| 7.78E-37 | 0.50339853   | 0.296 | 0.059 | 1.03E-32 | 13 Eif1ad        |
| 1.04E-36 | 0.666096904  | 0.859 | 0.377 | 1.37E-32 | 13 Gm8186        |
| 1.06E-36 | 0.388072637  | 0.296 | 0.059 | 1.40E-32 | 13 C330006A16Rik |
| 1.08E-36 | 0.372313981  | 0.377 | 0.087 | 1.42E-32 | 13 Dazap1        |
| 1.11E-36 | 0.549149119  | 0.513 | 0.144 | 1.46E-32 | 13 mt-Nd3        |
| 1.38E-36 | 0.410582046  | 0.357 | 0.08  | 1.82E-32 | 13 Tcpl          |
| 1.53E-36 | 0.649314547  | 0.859 | 0.37  | 2.02E-32 | 13 Eif2s2        |
| 1.60E-36 | 0.464031273  | 0.985 | 0.873 | 2.11E-32 | 13 Rps27a        |
| 2.75E-36 | 0.354608817  | 0.327 | 0.069 | 3.63E-32 | 13 Cd81          |
| 2.77E-36 | 0.552981593  | 0.628 | 0.203 | 3.65E-32 | 13 Slc25a3       |
| 3.05E-36 | 0.279658601  | 0.276 | 0.052 | 4.02E-32 | 13 Adk           |
| 3.06E-36 | 0.501451313  | 0.714 | 0.238 | 4.04E-32 | 13 Timm13        |
| 3.08E-36 | 0.590188956  | 0.709 | 0.245 | 4.06E-32 | 13 Atp5g3        |
| 3.49E-36 | 0.318101657  | 0.327 | 0.069 | 4.60E-32 | 13 Prorsd1       |
| 3.95E-36 | 0.3570954    | 0.437 | 0.11  | 5.22E-32 | 13 Tomm6         |
| 4.00E-36 | 0.570999742  | 0.98  | 0.682 | 5.28E-32 | 13 Rps7          |
| 4.45E-36 | 0.505305134  | 0.99  | 0.761 | 5.86E-32 | 13 Rpl21         |
| 4.92E-36 | 0.646158041  | 0.92  | 0.507 | 6.48E-32 | 13 Snrpg         |
| 5.96E-36 | 0.386051249  | 0.291 | 0.058 | 7.86E-32 | 13 Nap1l4        |

|          |             |       |       |          |              |
|----------|-------------|-------|-------|----------|--------------|
| 6.04E-36 | 0.458945356 | 0.447 | 0.116 | 7.97E-32 | 13 Mrpl42    |
| 6.46E-36 | 0.374197548 | 0.251 | 0.045 | 8.52E-32 | 13 Ktn1      |
| 8.53E-36 | 0.534518316 | 0.995 | 0.765 | 1.13E-31 | 13 Rps3a1    |
| 8.54E-36 | 0.427043069 | 0.357 | 0.081 | 1.13E-31 | 13 Dhx9      |
| 1.18E-35 | 0.432970941 | 0.266 | 0.05  | 1.56E-31 | 13 Myef2     |
| 1.21E-35 | 0.438622014 | 0.573 | 0.171 | 1.60E-31 | 13 Gm6133    |
| 1.39E-35 | 0.670333884 | 0.899 | 0.456 | 1.84E-31 | 13 Rps18-ps3 |
| 1.70E-35 | 0.374039629 | 0.472 | 0.126 | 2.25E-31 | 13 Ctbp1     |
| 2.30E-35 | 0.398836501 | 0.462 | 0.123 | 3.04E-31 | 13 Ubap2l    |
| 2.32E-35 | 0.289071726 | 0.261 | 0.048 | 3.06E-31 | 13 Aqr       |
| 2.49E-35 | 0.320158816 | 0.312 | 0.064 | 3.28E-31 | 13 Add1      |
| 2.89E-35 | 0.316440847 | 0.261 | 0.048 | 3.81E-31 | 13 Prpf19    |
| 3.21E-35 | 0.618263611 | 0.744 | 0.282 | 4.24E-31 | 13 Cd24a     |
| 3.61E-35 | 0.525517544 | 0.99  | 0.741 | 4.77E-31 | 13 Rps15a    |
| 3.64E-35 | 0.37614158  | 0.286 | 0.057 | 4.80E-31 | 13 Mzt1      |
| 3.74E-35 | 0.417817525 | 0.482 | 0.132 | 4.94E-31 | 13 Nol7      |
| 4.02E-35 | 0.509889571 | 0.442 | 0.117 | 5.31E-31 | 13 Picalm    |
| 5.09E-35 | 0.393671242 | 0.402 | 0.099 | 6.71E-31 | 13 Gps2      |
| 5.27E-35 | 0.439391048 | 0.367 | 0.087 | 6.96E-31 | 13 Mcm3      |
| 5.76E-35 | 0.579731707 | 0.97  | 0.649 | 7.60E-31 | 13 Eef1a1    |
| 6.37E-35 | 0.409320829 | 0.276 | 0.055 | 8.40E-31 | 13 Bola1     |
| 8.27E-35 | 0.484439847 | 0.99  | 0.845 | 1.09E-30 | 13 Rpl38     |
| 8.44E-35 | 0.561039729 | 0.965 | 0.718 | 1.11E-30 | 13 Rps4x     |
| 9.12E-35 | 0.358431295 | 0.281 | 0.056 | 1.20E-30 | 13 Rbmxl1    |
| 9.34E-35 | 0.483327109 | 1     | 0.837 | 1.23E-30 | 13 Ptma      |
| 9.87E-35 | 0.347323715 | 0.367 | 0.086 | 1.30E-30 | 13 Ddx24     |
| 1.01E-34 | 0.48934572  | 0.503 | 0.145 | 1.34E-30 | 13 Hnrnpa0   |
| 1.15E-34 | 0.529920083 | 0.97  | 0.754 | 1.52E-30 | 13 Rps3      |
| 1.43E-34 | 0.341144482 | 0.452 | 0.119 | 1.89E-30 | 13 Mrpl54    |
| 1.46E-34 | 0.396295018 | 0.437 | 0.114 | 1.93E-30 | 13 Celf1     |
| 1.46E-34 | 0.32706219  | 0.312 | 0.066 | 1.93E-30 | 13 Eif3b     |

|          |              |       |       |          |                  |
|----------|--------------|-------|-------|----------|------------------|
| 1.60E-34 | 0.538511709  | 0.98  | 0.756 | 2.12E-30 | 13 Rpl17         |
| 1.71E-34 | 0.608924744  | 0.784 | 0.31  | 2.25E-30 | 13 Ranbp1        |
| 2.06E-34 | 0.352730954  | 0.281 | 0.056 | 2.72E-30 | 13 Cdk2ap1       |
| 2.27E-34 | 0.601022932  | 0.935 | 0.58  | 2.99E-30 | 13 Wdr89         |
| 2.43E-34 | 0.473892318  | 0.603 | 0.191 | 3.20E-30 | 13 Ssb           |
| 2.81E-34 | 0.556063114  | 0.95  | 0.634 | 3.71E-30 | 13 Rpl18         |
| 3.15E-34 | 0.344429865  | 0.261 | 0.05  | 4.15E-30 | 13 Aco2          |
| 3.16E-34 | 0.441179315  | 0.427 | 0.111 | 4.16E-30 | 13 Gtf2a2        |
| 3.24E-34 | 0.336221525  | 0.276 | 0.055 | 4.28E-30 | 13 Snrnp25       |
| 5.31E-34 | 0.395544259  | 0.276 | 0.055 | 7.01E-30 | 13 Ddb1          |
| 5.32E-34 | 0.411231795  | 0.437 | 0.116 | 7.02E-30 | 13 Syncrip       |
| 7.86E-34 | 0.309433177  | 0.357 | 0.084 | 1.04E-29 | 13 Cct2          |
| 9.94E-34 | 0.255126423  | 0.402 | 0.1   | 1.31E-29 | 13 Itga4         |
| 1.00E-33 | 0.338613782  | 0.377 | 0.091 | 1.32E-29 | 13 Larp7         |
| 1.04E-33 | 0.39391575   | 0.256 | 0.049 | 1.37E-29 | 13 Noc2l         |
| 1.30E-33 | 0.351551746  | 0.251 | 0.047 | 1.71E-29 | 13 Nip7          |
| 1.53E-33 | 0.359918155  | 0.397 | 0.099 | 2.01E-29 | 13 Fundc2        |
| 1.86E-33 | 0.307538284  | 0.352 | 0.082 | 2.46E-29 | 13 Asap1         |
| 2.04E-33 | 0.428629849  | 0.623 | 0.199 | 2.69E-29 | 13 Hnrnpc        |
| 2.26E-33 | 0.420803924  | 0.286 | 0.06  | 2.98E-29 | 13 Srrt          |
| 2.37E-33 | -2.046319377 | 0.618 | 0.744 | 3.13E-29 | 13 Tmsb10        |
| 2.71E-33 | 0.454062285  | 1     | 0.898 | 3.57E-29 | 13 Rps28         |
| 5.27E-33 | 0.461137382  | 0.497 | 0.146 | 6.95E-29 | 13 Ndufa12       |
| 6.11E-33 | 0.528358286  | 0.749 | 0.279 | 8.07E-29 | 13 Nap1l1        |
| 6.70E-33 | 0.487949267  | 0.98  | 0.738 | 8.83E-29 | 13 Rpl9          |
| 7.60E-33 | 0.399668046  | 0.261 | 0.052 | 1.00E-28 | 13 Sgol1         |
| 8.00E-33 | 0.405718805  | 0.281 | 0.058 | 1.06E-28 | 13 Atp8a1        |
| 8.66E-33 | 0.392938122  | 0.362 | 0.088 | 1.14E-28 | 13 Cct4          |
| 1.04E-32 | 0.333505155  | 0.302 | 0.066 | 1.37E-28 | 13 1500011K16Rik |
| 1.05E-32 | 0.413782323  | 0.462 | 0.13  | 1.38E-28 | 13 Bcas2         |
| 1.14E-32 | 0.492628002  | 0.653 | 0.224 | 1.50E-28 | 13 Park7         |

|          |             |       |       |          |               |
|----------|-------------|-------|-------|----------|---------------|
| 1.43E-32 | 0.544207449 | 0.96  | 0.648 | 1.89E-28 | 13 Rps10      |
| 1.55E-32 | 0.373422014 | 0.276 | 0.057 | 2.05E-28 | 13 Kdm2b      |
| 1.63E-32 | 0.341676207 | 0.276 | 0.057 | 2.15E-28 | 13 Pop5       |
| 2.85E-32 | 0.327256828 | 0.302 | 0.066 | 3.75E-28 | 13 Paics      |
| 3.04E-32 | 0.560866454 | 0.899 | 0.424 | 4.02E-28 | 13 Gnb2l1     |
| 3.08E-32 | 0.330833035 | 0.477 | 0.134 | 4.06E-28 | 13 Ssna1      |
| 3.16E-32 | 0.291768223 | 0.302 | 0.066 | 4.16E-28 | 13 Pdhb       |
| 3.50E-32 | 0.411800959 | 0.271 | 0.056 | 4.61E-28 | 13 Nudcd2     |
| 3.75E-32 | 0.265775704 | 0.276 | 0.057 | 4.95E-28 | 13 Taf12      |
| 4.18E-32 | 0.5708004   | 0.92  | 0.513 | 5.51E-28 | 13 Rpl22      |
| 4.40E-32 | 0.533906507 | 0.839 | 0.344 | 5.80E-28 | 13 Gpx4       |
| 6.13E-32 | 0.298368855 | 0.422 | 0.112 | 8.08E-28 | 13 Cdc26      |
| 7.05E-32 | 0.358855635 | 0.392 | 0.101 | 9.30E-28 | 13 U2af2      |
| 8.04E-32 | -0.70770368 | 0.99  | 0.998 | 1.06E-27 | 13 Malat1     |
| 9.68E-32 | 0.628331979 | 0.899 | 0.493 | 1.28E-27 | 13 Rpl22l1    |
| 9.99E-32 | 0.438359542 | 0.467 | 0.136 | 1.32E-27 | 13 Morf4l2    |
| 1.09E-31 | 0.36339505  | 0.477 | 0.137 | 1.44E-27 | 13 Sod1       |
| 1.14E-31 | 0.484810632 | 0.98  | 0.737 | 1.51E-27 | 13 Rps15      |
| 1.35E-31 | 0.462596174 | 0.98  | 0.802 | 1.78E-27 | 13 Rps16      |
| 2.03E-31 | 0.267626957 | 0.271 | 0.056 | 2.68E-27 | 13 Polr2m     |
| 2.16E-31 | 0.32539785  | 0.322 | 0.075 | 2.85E-27 | 13 Rbm17      |
| 2.22E-31 | 0.436560679 | 0.633 | 0.213 | 2.93E-27 | 13 Lsm4       |
| 2.36E-31 | 0.48148326  | 0.97  | 0.701 | 3.11E-27 | 13 Rpl31      |
| 2.38E-31 | 0.611439594 | 0.824 | 0.358 | 3.14E-27 | 13 Srrm2      |
| 2.71E-31 | -1.27558387 | 0.452 | 0.672 | 3.58E-27 | 13 Arhgdib    |
| 2.92E-31 | 0.422364066 | 0.995 | 0.878 | 3.85E-27 | 13 Rps14      |
| 3.39E-31 | 0.460149022 | 0.372 | 0.097 | 4.47E-27 | 13 Srpk1      |
| 4.33E-31 | 0.361204074 | 0.432 | 0.12  | 5.71E-27 | 13 Rpl13a-ps1 |
| 4.39E-31 | 0.439077463 | 0.367 | 0.095 | 5.79E-27 | 13 Mcm5       |
| 4.66E-31 | 0.4815899   | 0.98  | 0.814 | 6.15E-27 | 13 Rpl23a     |
| 5.21E-31 | 0.485733901 | 0.985 | 0.714 | 6.88E-27 | 13 Rpl19      |

|          |              |       |       |          |                  |
|----------|--------------|-------|-------|----------|------------------|
| 5.48E-31 | 0.300023746  | 0.482 | 0.139 | 7.23E-27 | 13 Mrpl14        |
| 6.99E-31 | 0.314769708  | 0.357 | 0.089 | 9.22E-27 | 13 Ak2           |
| 9.13E-31 | 0.377334442  | 0.543 | 0.169 | 1.20E-26 | 13 Dnmt1         |
| 9.89E-31 | 0.294757017  | 0.286 | 0.063 | 1.30E-26 | 13 Mrps26        |
| 1.10E-30 | 0.372095168  | 0.377 | 0.098 | 1.46E-26 | 13 Cct7          |
| 1.28E-30 | 0.303374202  | 0.286 | 0.063 | 1.68E-26 | 13 Zcchc6        |
| 1.50E-30 | 0.540469476  | 0.834 | 0.371 | 1.98E-26 | 13 Hist1h2ap     |
| 1.59E-30 | 0.4215869    | 0.593 | 0.196 | 2.10E-26 | 13 Hnrnpd        |
| 1.78E-30 | -1.178046495 | 0.538 | 0.697 | 2.35E-26 | 13 Sh3bgrl3      |
| 2.07E-30 | 0.261574295  | 0.307 | 0.07  | 2.74E-26 | 13 Utp11l        |
| 2.21E-30 | 0.334449679  | 0.407 | 0.109 | 2.92E-26 | 13 Scaf11        |
| 2.39E-30 | 0.356566283  | 0.302 | 0.069 | 3.15E-26 | 13 Ebna1bp2      |
| 2.64E-30 | 0.293840767  | 0.342 | 0.084 | 3.49E-26 | 13 Cse1          |
| 2.90E-30 | 0.468523653  | 0.673 | 0.243 | 3.82E-26 | 13 Alyref        |
| 3.61E-30 | 0.519145543  | 0.698 | 0.257 | 4.76E-26 | 13 Romo1         |
| 3.91E-30 | 0.546922416  | 0.814 | 0.351 | 5.16E-26 | 13 Ran           |
| 4.12E-30 | 0.282016827  | 0.472 | 0.136 | 5.43E-26 | 13 Chchd1        |
| 4.19E-30 | 0.374811708  | 0.286 | 0.064 | 5.53E-26 | 13 Sf3b3         |
| 4.45E-30 | 0.473643866  | 0.789 | 0.306 | 5.87E-26 | 13 Gm10036       |
| 4.52E-30 | 0.337444196  | 0.276 | 0.06  | 5.97E-26 | 13 Gins1         |
| 5.02E-30 | 0.586211082  | 0.94  | 0.558 | 6.62E-26 | 13 mt-Nd4        |
| 5.43E-30 | 0.438039724  | 0.578 | 0.193 | 7.16E-26 | 13 Ewsr1         |
| 5.48E-30 | 0.277714544  | 0.332 | 0.08  | 7.23E-26 | 13 Sdh           |
| 6.19E-30 | 0.391601681  | 0.447 | 0.13  | 8.17E-26 | 13 Eny2          |
| 6.25E-30 | 0.387465183  | 0.553 | 0.177 | 8.24E-26 | 13 Thoc7         |
| 6.28E-30 | 0.375276869  | 0.447 | 0.13  | 8.28E-26 | 13 1810043H04Rik |
| 8.05E-30 | 0.478876814  | 0.633 | 0.227 | 1.06E-25 | 13 Cks1b         |
| 8.13E-30 | 0.424359421  | 0.698 | 0.249 | 1.07E-25 | 13 Prrc2c        |
| 8.40E-30 | 0.261703217  | 0.266 | 0.057 | 1.11E-25 | 13 Mbd3          |
| 9.03E-30 | 0.265451537  | 0.347 | 0.086 | 1.19E-25 | 13 Sltm          |
| 9.97E-30 | 0.30660567   | 0.392 | 0.105 | 1.31E-25 | 13 Fbl           |

|          |              |       |       |          |            |
|----------|--------------|-------|-------|----------|------------|
| 1.26E-29 | 0.555393715  | 0.859 | 0.413 | 1.67E-25 | 13 Eef2    |
| 2.18E-29 | 0.396366463  | 0.407 | 0.114 | 2.88E-25 | 13 Pfdn6   |
| 2.35E-29 | 0.424635704  | 0.427 | 0.123 | 3.10E-25 | 13 Alkbh5  |
| 2.45E-29 | 0.301665861  | 0.266 | 0.057 | 3.23E-25 | 13 Bcl7c   |
| 2.61E-29 | 0.308892271  | 0.261 | 0.056 | 3.45E-25 | 13 Gm10146 |
| 3.68E-29 | 0.509304228  | 0.392 | 0.109 | 4.85E-25 | 13 Pfdn1   |
| 3.80E-29 | 0.354437552  | 0.432 | 0.123 | 5.01E-25 | 13 Nudt21  |
| 4.23E-29 | -1.608554918 | 0.377 | 0.622 | 5.57E-25 | 13 Ly6c2   |
| 4.42E-29 | 0.327133231  | 0.628 | 0.211 | 5.84E-25 | 13 Snrpd1  |
| 5.38E-29 | 0.287218351  | 0.422 | 0.118 | 7.10E-25 | 13 Zc3h15  |
| 5.96E-29 | 0.466512418  | 0.513 | 0.165 | 7.86E-25 | 13 Mrpl18  |
| 6.20E-29 | 0.3744299    | 0.523 | 0.166 | 8.18E-25 | 13 Slbp    |
| 6.59E-29 | 0.303295887  | 0.296 | 0.069 | 8.69E-25 | 13 Etf1    |
| 7.11E-29 | 0.500788084  | 0.965 | 0.709 | 9.38E-25 | 13 Rpl11   |
| 7.33E-29 | 0.336410681  | 0.347 | 0.089 | 9.67E-25 | 13 Mrps17  |
| 7.97E-29 | 0.337561328  | 0.357 | 0.093 | 1.05E-24 | 13 Wdr83os |
| 8.94E-29 | 0.378747859  | 0.312 | 0.076 | 1.18E-24 | 13 Psmc2   |
| 9.03E-29 | 0.254265163  | 0.357 | 0.092 | 1.19E-24 | 13 Cdc37   |
| 1.01E-28 | 0.394182011  | 0.477 | 0.147 | 1.34E-24 | 13 Tomm22  |
| 1.07E-28 | 0.360942521  | 0.312 | 0.076 | 1.41E-24 | 13 Ptbp1   |
| 1.30E-28 | 0.265979632  | 0.251 | 0.053 | 1.72E-24 | 13 Upf1    |
| 1.31E-28 | 0.313121893  | 0.332 | 0.083 | 1.73E-24 | 13 Atp13a3 |
| 1.36E-28 | 0.374704056  | 0.623 | 0.211 | 1.80E-24 | 13 Atp5a1  |
| 1.42E-28 | 0.395455566  | 0.518 | 0.165 | 1.88E-24 | 13 Mrpl23  |
| 1.67E-28 | 0.434172369  | 0.553 | 0.186 | 2.20E-24 | 13 Llph    |
| 1.77E-28 | 0.4292891    | 0.724 | 0.272 | 2.33E-24 | 13 Eif4a1  |
| 1.96E-28 | 0.254661295  | 0.412 | 0.115 | 2.59E-24 | 13 Plekhj1 |
| 1.98E-28 | 0.314090397  | 0.322 | 0.08  | 2.61E-24 | 13 Rad23b  |
| 2.06E-28 | 0.369277443  | 0.392 | 0.109 | 2.71E-24 | 13 Acin1   |
| 2.20E-28 | 0.292945052  | 0.307 | 0.074 | 2.91E-24 | 13 Tmem147 |
| 2.21E-28 | 0.414064303  | 0.467 | 0.142 | 2.91E-24 | 13 Hnrnpr  |



|          |              |       |       |          |                  |
|----------|--------------|-------|-------|----------|------------------|
| 2.27E-28 | 0.331929468  | 0.291 | 0.068 | 2.99E-24 | 13 Ppp2r4        |
| 2.91E-28 | 0.368963165  | 0.256 | 0.056 | 3.84E-24 | 13 Orc6          |
| 2.92E-28 | 0.434689589  | 0.698 | 0.264 | 3.85E-24 | 13 Bola2         |
| 4.32E-28 | 0.414996071  | 0.377 | 0.105 | 5.70E-24 | 13 Uhrf1         |
| 4.32E-28 | 0.350738332  | 0.472 | 0.145 | 5.70E-24 | 13 1110001J03Rik |
| 4.49E-28 | 0.376280265  | 0.513 | 0.165 | 5.92E-24 | 13 Polr1d        |
| 5.12E-28 | 0.269457799  | 0.291 | 0.068 | 6.76E-24 | 13 Zmynd8        |
| 5.37E-28 | 0.331919039  | 0.352 | 0.093 | 7.09E-24 | 13 Cyb5a         |
| 6.04E-28 | 0.366550665  | 0.432 | 0.128 | 7.97E-24 | 13 Timm8b        |
| 6.05E-28 | 0.289030939  | 0.467 | 0.141 | 7.98E-24 | 13 Uqcfrfs1      |
| 6.07E-28 | 0.584128333  | 0.829 | 0.399 | 8.00E-24 | 13 Chchd2        |
| 6.18E-28 | 0.365759341  | 0.407 | 0.117 | 8.15E-24 | 13 Dctpp1        |
| 6.47E-28 | 0.379895279  | 0.608 | 0.21  | 8.54E-24 | 13 Ndufc2        |
| 6.51E-28 | 0.349504243  | 0.432 | 0.128 | 8.58E-24 | 13 Mrpl20        |
| 6.51E-28 | 0.328413323  | 0.482 | 0.149 | 8.59E-24 | 13 Rpa3          |
| 7.28E-28 | 0.269433204  | 0.296 | 0.071 | 9.61E-24 | 13 Polr2e        |
| 7.32E-28 | 0.32930901   | 0.312 | 0.077 | 9.66E-24 | 13 Cdca7         |
| 8.78E-28 | 0.36679865   | 0.427 | 0.126 | 1.16E-23 | 13 Naa50         |
| 9.81E-28 | 0.274936686  | 0.322 | 0.08  | 1.29E-23 | 13 Zfp106        |
| 1.21E-27 | -2.049718957 | 1     | 0.999 | 1.60E-23 | 13 S100a8        |
| 1.74E-27 | 0.535606011  | 0.849 | 0.422 | 2.30E-23 | 13 Rpl13-ps3     |
| 1.93E-27 | 0.506966269  | 0.96  | 0.589 | 2.54E-23 | 13 Rpl3          |
| 2.23E-27 | 0.364858689  | 0.281 | 0.067 | 2.94E-23 | 13 Dnajc2        |
| 2.60E-27 | 0.361841342  | 0.286 | 0.069 | 3.43E-23 | 13 Commd7        |
| 2.62E-27 | 0.395508294  | 0.271 | 0.063 | 3.45E-23 | 13 Ikzf5         |
| 2.99E-27 | 0.282647849  | 0.452 | 0.136 | 3.94E-23 | 13 Pcnp          |
| 3.19E-27 | 0.368775216  | 0.568 | 0.194 | 4.20E-23 | 13 Ndufa5        |
| 3.31E-27 | 0.530048718  | 0.975 | 0.695 | 4.36E-23 | 13 mt-Cytb       |
| 3.61E-27 | 0.312794727  | 0.332 | 0.086 | 4.77E-23 | 13 Herc1         |
| 3.68E-27 | 0.340412411  | 0.497 | 0.158 | 4.85E-23 | 13 Srsf1         |
| 3.91E-27 | 0.382555002  | 0.492 | 0.158 | 5.16E-23 | 13 Papola        |

|          |             |       |       |          |             |
|----------|-------------|-------|-------|----------|-------------|
| 4.13E-27 | 0.398176996 | 0.995 | 0.87  | 5.44E-23 | 13 Rpl18a   |
| 4.44E-27 | 0.380341547 | 0.472 | 0.148 | 5.86E-23 | 13 Rpn1     |
| 6.43E-27 | 0.321331992 | 0.563 | 0.189 | 8.48E-23 | 13 Dnajc8   |
| 6.54E-27 | 0.389427793 | 0.503 | 0.165 | 8.63E-23 | 13 Siva1    |
| 7.92E-27 | 0.337332716 | 0.457 | 0.141 | 1.04E-22 | 13 Cnbp     |
| 9.58E-27 | 0.294724984 | 0.372 | 0.103 | 1.26E-22 | 13 Eif3m    |
| 1.07E-26 | 0.438010757 | 0.332 | 0.089 | 1.41E-22 | 13 Hist1h1e |
| 1.11E-26 | 0.367430846 | 0.467 | 0.147 | 1.46E-22 | 13 Dnaja1   |
| 1.14E-26 | 0.272278817 | 0.276 | 0.065 | 1.51E-22 | 13 Dph3     |
| 1.46E-26 | 0.293847782 | 0.482 | 0.152 | 1.92E-22 | 13 Tceb1    |
| 1.54E-26 | 0.279246832 | 0.357 | 0.097 | 2.04E-22 | 13 Cct5     |
| 1.70E-26 | 0.302804352 | 0.276 | 0.066 | 2.24E-22 | 13 Fbxo3    |
| 2.07E-26 | 0.360204196 | 0.503 | 0.165 | 2.73E-22 | 13 Uqcc2    |
| 2.48E-26 | 0.311224117 | 0.332 | 0.088 | 3.27E-22 | 13 Hmgn5    |
| 2.74E-26 | 0.289238674 | 0.382 | 0.108 | 3.61E-22 | 13 Snrpc    |
| 2.79E-26 | 0.481779205 | 0.317 | 0.084 | 3.68E-22 | 13 Ccne2    |
| 3.09E-26 | 0.347954463 | 0.492 | 0.16  | 4.08E-22 | 13 Pdcd5    |
| 3.68E-26 | 0.520820548 | 0.905 | 0.499 | 4.86E-22 | 13 Pabpc1   |
| 4.38E-26 | 0.288005382 | 0.271 | 0.064 | 5.78E-22 | 13 Lage3    |
| 4.48E-26 | 0.34489594  | 0.251 | 0.057 | 5.91E-22 | 13 Eif2a    |
| 5.66E-26 | 0.408362319 | 0.608 | 0.222 | 7.47E-22 | 13 Snrpd3   |
| 6.21E-26 | 0.527524165 | 0.854 | 0.419 | 8.19E-22 | 13 Cox17    |
| 8.42E-26 | -1.68871034 | 0.186 | 0.511 | 1.11E-21 | 13 Cybb     |
| 8.48E-26 | 0.498839068 | 0.749 | 0.313 | 1.12E-21 | 13 Cks2     |
| 8.84E-26 | 0.379243993 | 0.673 | 0.252 | 1.17E-21 | 13 Ndufs6   |
| 9.22E-26 | 0.529346784 | 0.839 | 0.394 | 1.22E-21 | 13 Anp32b   |
| 9.58E-26 | 0.407503363 | 0.447 | 0.143 | 1.26E-21 | 13 Prdx6    |
| 1.20E-25 | 0.360381717 | 0.437 | 0.137 | 1.58E-21 | 13 Nmt1     |
| 1.21E-25 | 0.51854879  | 0.859 | 0.421 | 1.60E-21 | 13 Gm9493   |
| 1.40E-25 | 0.338549034 | 0.603 | 0.212 | 1.84E-21 | 13 Mrps14   |
| 1.59E-25 | 0.262431545 | 0.503 | 0.162 | 2.09E-21 | 13 Rp9      |

|          |              |       |       |          |             |
|----------|--------------|-------|-------|----------|-------------|
| 1.62E-25 | 0.453602471  | 0.975 | 0.72  | 2.14E-21 | 13 Rps25    |
| 1.65E-25 | 0.504776923  | 0.91  | 0.536 | 2.18E-21 | 13 Rpl7     |
| 1.71E-25 | 0.477741634  | 0.759 | 0.323 | 2.25E-21 | 13 Nucks1   |
| 1.79E-25 | 0.335923469  | 0.422 | 0.129 | 2.36E-21 | 13 Ythdf2   |
| 2.21E-25 | 0.462502409  | 0.879 | 0.417 | 2.92E-21 | 13 Rpl5     |
| 2.29E-25 | -0.933466205 | 0.995 | 0.999 | 3.02E-21 | 13 Actb     |
| 2.44E-25 | 0.321120928  | 0.342 | 0.094 | 3.22E-21 | 13 R3hdm1   |
| 3.42E-25 | 0.31747687   | 0.548 | 0.187 | 4.51E-21 | 13 Al662270 |
| 3.74E-25 | 0.351154468  | 0.312 | 0.083 | 4.94E-21 | 13 Ndufa10  |
| 4.10E-25 | 0.412422619  | 0.658 | 0.25  | 5.41E-21 | 13 Snrpd2   |
| 4.30E-25 | 0.35116793   | 0.508 | 0.172 | 5.68E-21 | 13 Pdna     |
| 4.67E-25 | 0.278342502  | 0.291 | 0.074 | 6.17E-21 | 13 Chtop    |
| 4.75E-25 | 0.298192645  | 0.266 | 0.064 | 6.26E-21 | 13 Eif3d    |
| 4.83E-25 | 0.328997712  | 0.417 | 0.129 | 6.37E-21 | 13 Polr2j   |
| 5.53E-25 | 0.401636907  | 0.327 | 0.091 | 7.30E-21 | 13 Mcm6     |
| 5.58E-25 | -1.276665077 | 0.508 | 0.649 | 7.36E-21 | 13 Prdx5    |
| 5.63E-25 | 0.346331697  | 0.382 | 0.113 | 7.43E-21 | 13 Cenpw    |
| 5.96E-25 | 0.26734017   | 0.332 | 0.09  | 7.86E-21 | 13 Eif3g    |
| 6.04E-25 | 0.444004775  | 0.809 | 0.359 | 7.97E-21 | 13 Srsf2    |
| 9.28E-25 | 0.339115734  | 0.307 | 0.081 | 1.22E-20 | 13 Emc6     |
| 1.17E-24 | 0.30893066   | 0.266 | 0.065 | 1.54E-20 | 13 Hectd1   |
| 1.20E-24 | 0.384683705  | 0.256 | 0.062 | 1.58E-20 | 13 Tmx1     |
| 1.25E-24 | 0.29764073   | 0.492 | 0.164 | 1.65E-20 | 13 Creg1    |
| 1.64E-24 | 0.496816007  | 0.995 | 0.855 | 2.16E-20 | 13 mt-Atp6  |
| 1.64E-24 | 0.499506012  | 0.889 | 0.451 | 2.17E-20 | 13 Rpl30    |
| 1.65E-24 | 0.313246764  | 0.538 | 0.188 | 2.17E-20 | 13 Caprin1  |
| 1.81E-24 | 0.252798596  | 0.362 | 0.104 | 2.39E-20 | 13 Zc3hav1  |
| 1.82E-24 | 0.378264219  | 0.276 | 0.07  | 2.41E-20 | 13 Ube2e3   |
| 2.47E-24 | 0.264634049  | 0.523 | 0.175 | 3.26E-20 | 13 Mrpl57   |
| 2.70E-24 | 0.320422998  | 0.307 | 0.082 | 3.56E-20 | 13 Pkig     |
| 2.74E-24 | -2.084430173 | 0.995 | 0.994 | 3.62E-20 | 13 S100a9   |

|          |              |       |       |          |            |
|----------|--------------|-------|-------|----------|------------|
| 2.81E-24 | 0.405111409  | 0.332 | 0.094 | 3.70E-20 | 13 Thrap3  |
| 2.89E-24 | 0.312694633  | 0.477 | 0.156 | 3.82E-20 | 13 Stra13  |
| 3.17E-24 | -1.253070892 | 0.598 | 0.687 | 4.18E-20 | 13 Plac8   |
| 4.24E-24 | 0.266548592  | 0.286 | 0.073 | 5.59E-20 | 13 Maz     |
| 4.42E-24 | 0.301526573  | 0.256 | 0.062 | 5.83E-20 | 13 Actl6a  |
| 4.48E-24 | 0.315959174  | 0.332 | 0.093 | 5.91E-20 | 13 Sdha    |
| 6.12E-24 | 0.342269312  | 0.663 | 0.252 | 8.07E-20 | 13 Snrpb   |
| 6.51E-24 | -1.411452201 | 0.362 | 0.589 | 8.58E-20 | 13 S100a11 |
| 7.46E-24 | 0.371067897  | 0.663 | 0.255 | 9.84E-20 | 13 Ndufb9  |
| 7.76E-24 | 0.473845915  | 0.779 | 0.354 | 1.02E-19 | 13 Tuba1b  |
| 8.79E-24 | -1.418836425 | 0.261 | 0.536 | 1.16E-19 | 13 Coro1a  |
| 1.13E-23 | 0.266959667  | 0.467 | 0.153 | 1.48E-19 | 13 Ube2i   |
| 1.26E-23 | 0.288240941  | 0.261 | 0.065 | 1.66E-19 | 13 Tmem33  |
| 1.31E-23 | -0.750989727 | 0.784 | 0.78  | 1.72E-19 | 13 Shfm1   |
| 1.76E-23 | 0.294138438  | 0.513 | 0.177 | 2.32E-19 | 13 Srsf6   |
| 2.12E-23 | 0.354775008  | 0.332 | 0.095 | 2.79E-19 | 13 Suz12   |
| 2.38E-23 | 0.314052225  | 0.995 | 0.975 | 3.13E-19 | 13 Rps29   |
| 4.22E-23 | 0.453249231  | 0.784 | 0.355 | 5.56E-19 | 13 Dek     |
| 4.57E-23 | 0.338724806  | 0.588 | 0.218 | 6.02E-19 | 13 Csnk1a1 |
| 7.02E-23 | 0.270939525  | 0.312 | 0.086 | 9.27E-19 | 13 Cdca3   |
| 7.32E-23 | 0.296606904  | 0.467 | 0.159 | 9.65E-19 | 13 Higd1a  |
| 8.15E-23 | 0.269553019  | 0.296 | 0.08  | 1.08E-18 | 13 Arl6ip4 |
| 8.56E-23 | 0.493436459  | 0.869 | 0.488 | 1.13E-18 | 13 Rpl7a   |
| 1.00E-22 | 0.3591029    | 0.508 | 0.182 | 1.32E-18 | 13 Sf3b5   |
| 1.11E-22 | 0.348534245  | 0.704 | 0.286 | 1.47E-18 | 13 Atp5g2  |
| 1.16E-22 | 0.38573707   | 0.608 | 0.237 | 1.53E-18 | 13 Rbm25   |
| 1.16E-22 | 0.318362062  | 0.588 | 0.218 | 1.53E-18 | 13 Anp32e  |
| 1.20E-22 | -1.077251038 | 0.523 | 0.653 | 1.58E-18 | 13 Itm2b   |
| 1.29E-22 | 0.29964778   | 0.608 | 0.229 | 1.70E-18 | 13 Ube2s   |
| 1.46E-22 | 0.354384841  | 0.477 | 0.168 | 1.93E-18 | 13 Lsm3    |
| 1.70E-22 | 0.29050429   | 0.513 | 0.18  | 2.24E-18 | 13 Elavl1  |

|          |             |       |       |          |                  |
|----------|-------------|-------|-------|----------|------------------|
| 1.99E-22 | 0.297349997 | 0.513 | 0.182 | 2.63E-18 | 13 Hnrnpl        |
| 2.29E-22 | 0.313620689 | 0.467 | 0.161 | 3.02E-18 | 13 Cbx1          |
| 2.50E-22 | 0.397776913 | 0.92  | 0.484 | 3.29E-18 | 13 Tubb5         |
| 2.81E-22 | 0.255059883 | 0.251 | 0.063 | 3.71E-18 | 13 Casc5         |
| 5.47E-22 | 0.254475508 | 0.327 | 0.095 | 7.22E-18 | 13 Usp34         |
| 6.02E-22 | 0.258367754 | 0.427 | 0.141 | 7.94E-18 | 13 Chd4          |
| 6.84E-22 | 0.309183355 | 0.377 | 0.119 | 9.02E-18 | 13 Dnajc9        |
| 7.03E-22 | 0.395795428 | 0.945 | 0.689 | 9.27E-18 | 13 Oaz1          |
| 8.20E-22 | 0.286312412 | 0.407 | 0.132 | 1.08E-17 | 13 Brd7          |
| 8.68E-22 | 0.391303913 | 0.98  | 0.681 | 1.15E-17 | 13 Hmgb1         |
| 9.81E-22 | 0.298957962 | 0.352 | 0.108 | 1.29E-17 | 13 0610012G03Rik |
| 9.84E-22 | 0.273382284 | 0.271 | 0.073 | 1.30E-17 | 13 Eif4h         |
| 1.10E-21 | 0.420535294 | 0.759 | 0.338 | 1.46E-17 | 13 Rpl6l         |
| 1.27E-21 | 0.269162907 | 0.337 | 0.101 | 1.68E-17 | 13 U2surp        |
| 1.39E-21 | 0.436056539 | 0.925 | 0.663 | 1.83E-17 | 13 Rpl23a-ps3    |
| 1.47E-21 | 0.286545557 | 0.322 | 0.095 | 1.94E-17 | 13 Galnt1        |
| 1.50E-21 | 0.364510167 | 0.97  | 0.8   | 1.97E-17 | 13 Rpl34         |
| 1.57E-21 | 0.272298769 | 0.337 | 0.101 | 2.07E-17 | 13 Hjurp         |
| 1.77E-21 | 0.250978087 | 0.271 | 0.073 | 2.34E-17 | 13 Gm6483        |
| 1.78E-21 | 0.424097525 | 0.935 | 0.672 | 2.35E-17 | 13 Rpl27         |
| 2.01E-21 | 0.335980936 | 0.291 | 0.082 | 2.65E-17 | 13 Plk4          |
| 3.25E-21 | 0.261543047 | 0.523 | 0.191 | 4.28E-17 | 13 Atp5d         |
| 3.45E-21 | 0.427918142 | 0.779 | 0.37  | 4.55E-17 | 13 Minos1        |
| 3.92E-21 | 0.345775992 | 0.302 | 0.088 | 5.17E-17 | 13 Ccna2         |
| 3.97E-21 | 0.385679633 | 0.312 | 0.093 | 5.24E-17 | 13 Wdr76         |
| 6.13E-21 | 0.266707798 | 0.548 | 0.207 | 8.09E-17 | 13 Mki67         |
| 1.08E-20 | 0.257172081 | 0.357 | 0.112 | 1.42E-16 | 13 Ubxn1         |
| 1.20E-20 | 0.373253152 | 0.266 | 0.074 | 1.59E-16 | 13 Tspan32       |
| 1.41E-20 | 0.25472304  | 0.251 | 0.067 | 1.86E-16 | 13 Ipo7          |
| 1.51E-20 | 0.386377349 | 0.678 | 0.296 | 1.99E-16 | 13 Canx          |
| 1.96E-20 | 0.251296903 | 0.266 | 0.073 | 2.59E-16 | 13 Prrc2a        |

|          |              |       |       |          |             |
|----------|--------------|-------|-------|----------|-------------|
| 2.35E-20 | 0.387091643  | 0.698 | 0.305 | 3.10E-16 | 13 Snrpe    |
| 3.37E-20 | 0.396282107  | 0.683 | 0.307 | 4.45E-16 | 13 Top2a    |
| 4.54E-20 | 0.259049702  | 0.256 | 0.07  | 5.99E-16 | 13 Asxl2    |
| 5.01E-20 | 0.403823623  | 0.95  | 0.637 | 6.61E-16 | 13 Gm10263  |
| 5.37E-20 | 0.417784074  | 0.854 | 0.435 | 7.08E-16 | 13 Rpl9-ps6 |
| 5.47E-20 | 0.311733176  | 0.302 | 0.091 | 7.22E-16 | 13 Aimp1    |
| 6.04E-20 | -0.893285472 | 0.658 | 0.687 | 7.97E-16 | 13 Actg1    |
| 6.29E-20 | 0.300803086  | 0.307 | 0.093 | 8.30E-16 | 13 Ankrd13a |
| 6.93E-20 | 0.257812127  | 0.317 | 0.096 | 9.14E-16 | 13 Baz1b    |
| 8.41E-20 | 0.305760638  | 0.327 | 0.101 | 1.11E-15 | 13 Fam104a  |
| 8.48E-20 | 0.459452944  | 0.714 | 0.326 | 1.12E-15 | 13 Srsf3    |
| 8.84E-20 | 0.320337641  | 0.985 | 0.869 | 1.17E-15 | 13 Rpl35a   |
| 9.22E-20 | 0.26268799   | 0.472 | 0.173 | 1.22E-15 | 13 Trmt112  |
| 1.53E-19 | 0.315543365  | 0.648 | 0.27  | 2.02E-15 | 13 Atp5b    |
| 1.97E-19 | 0.30457682   | 0.558 | 0.218 | 2.59E-15 | 13 Smc2     |
| 2.23E-19 | 0.300122065  | 0.367 | 0.123 | 2.94E-15 | 13 Usp1     |
| 2.73E-19 | 0.31465606   | 0.724 | 0.308 | 3.60E-15 | 13 Hnrnpu   |
| 2.85E-19 | 0.259683587  | 0.402 | 0.139 | 3.76E-15 | 13 Mrpl51   |
| 2.92E-19 | 0.268814622  | 0.643 | 0.265 | 3.85E-15 | 13 Arglu1   |
| 4.19E-19 | 0.344581289  | 0.99  | 0.799 | 5.53E-15 | 13 Rps24    |
| 5.63E-19 | 0.326087547  | 0.673 | 0.289 | 7.42E-15 | 13 Sfpq     |
| 7.53E-19 | 0.331055998  | 0.276 | 0.083 | 9.93E-15 | 13 Lsm12    |
| 8.30E-19 | -0.800990715 | 0.704 | 0.709 | 1.09E-14 | 13 Myl6     |
| 9.18E-19 | -1.977690977 | 1     | 0.929 | 1.21E-14 | 13 Camp     |
| 1.15E-18 | 0.280539243  | 0.382 | 0.132 | 1.52E-14 | 13          |
| 1.56E-18 | 0.390973746  | 0.754 | 0.35  | 2.05E-14 | 13 Eif4g2   |
| 1.71E-18 | 0.285431876  | 0.372 | 0.128 | 2.26E-14 | 13 Pole4    |
| 2.22E-18 | 0.312771576  | 0.271 | 0.081 | 2.93E-14 | 13 Clasp2   |
| 2.93E-18 | 0.339321049  | 0.588 | 0.241 | 3.87E-14 | 13 Ndufb2   |
| 3.09E-18 | 0.406725575  | 0.889 | 0.563 | 4.07E-14 | 13 Cox8a    |
| 3.18E-18 | 0.256692713  | 0.266 | 0.078 | 4.20E-14 | 13 Rbm6     |

2-Sep

|          |              |       |       |          |              |
|----------|--------------|-------|-------|----------|--------------|
| 3.55E-18 | 0.394003965  | 0.462 | 0.177 | 4.69E-14 | 13 Lockd     |
| 4.16E-18 | 0.284477357  | 0.623 | 0.261 | 5.49E-14 | 13 Atp5o     |
| 5.67E-18 | 0.400735337  | 0.925 | 0.575 | 7.48E-14 | 13 Gm26917   |
| 6.82E-18 | 0.369755998  | 0.824 | 0.415 | 8.99E-14 | 13 Sumo2     |
| 7.09E-18 | 0.273390474  | 0.256 | 0.075 | 9.36E-14 | 13 Tpx2      |
| 7.64E-18 | 0.341839105  | 0.271 | 0.083 | 1.01E-13 | 13 Mapk1ip1l |
| 7.97E-18 | 0.283654407  | 0.628 | 0.267 | 1.05E-13 | 13 mt-Nd4l   |
| 8.59E-18 | -1.277967298 | 0.603 | 0.633 | 1.13E-13 | 13 Cst3      |
| 1.07E-17 | 0.366620983  | 1     | 0.953 | 1.42E-13 | 13 mt-Co3    |
| 1.51E-17 | 0.351606111  | 0.704 | 0.313 | 1.99E-13 | 13 Eif3f     |
| 1.53E-17 | 0.309543882  | 0.266 | 0.081 | 2.02E-13 | 13 Stxbp2    |
| 1.61E-17 | 0.265655199  | 0.377 | 0.133 | 2.12E-13 | 13 Hnrnpdl   |
| 2.55E-17 | -0.537144654 | 0.884 | 0.834 | 3.37E-13 | 13 Pfn1      |
| 2.61E-17 | 0.349114166  | 0.94  | 0.684 | 3.45E-13 | 13 Rps13     |
| 3.01E-17 | 0.312297724  | 0.296 | 0.096 | 3.97E-13 | 13 Hells     |
| 3.26E-17 | 0.365783844  | 0.462 | 0.184 | 4.29E-13 | 13 Rrm2      |
| 3.38E-17 | -1.584070771 | 0.372 | 0.537 | 4.46E-13 | 13 S100a6    |
| 3.47E-17 | 0.312059104  | 0.668 | 0.295 | 4.58E-13 | 13 Pcbp1     |
| 4.17E-17 | -2.078255794 | 0.935 | 0.847 | 5.51E-13 | 13 Ngp       |
| 5.64E-17 | 0.257421716  | 0.382 | 0.139 | 7.44E-13 | 13 Rbm15     |
| 7.14E-17 | 0.266366036  | 0.367 | 0.132 | 9.42E-13 | 13 Psm5      |
| 1.13E-16 | 0.272427432  | 0.583 | 0.246 | 1.49E-12 | 13 Ndufb8    |
| 2.22E-16 | -1.74996402  | 0.452 | 0.556 | 2.93E-12 | 13 Chil3     |
| 2.73E-16 | 0.275204296  | 0.402 | 0.153 | 3.61E-12 | 13 Kdelr2    |
| 7.85E-16 | -1.196863728 | 0.231 | 0.451 | 1.04E-11 | 13 Arpc1b    |
| 9.86E-16 | 0.386687788  | 0.91  | 0.594 | 1.30E-11 | 13 Cox7c     |
| 1.00E-15 | 0.279459658  | 0.814 | 0.393 | 1.32E-11 | 13 Uqcrq     |
| 1.30E-15 | 0.318416533  | 0.744 | 0.365 | 1.72E-11 | 13 Btf3      |
| 2.84E-15 | 0.271958097  | 0.688 | 0.312 | 3.74E-11 | 13 Slc25a5   |
| 3.43E-15 | -1.556705002 | 0.457 | 0.562 | 4.52E-11 | 13 Ifitm3    |
| 4.52E-15 | -1.323770929 | 0.271 | 0.46  | 5.96E-11 | 13 Hp        |

|          |              |       |       |          |                  |
|----------|--------------|-------|-------|----------|------------------|
| 4.56E-15 | -1.140717977 | 0.246 | 0.451 | 6.01E-11 | 13 Gmfg          |
| 4.68E-15 | 0.307766827  | 0.839 | 0.455 | 6.17E-11 | 13 Rpl10-ps3     |
| 1.21E-14 | 0.306096537  | 0.819 | 0.44  | 1.59E-10 | 13 Naca          |
| 2.79E-14 | 0.289223045  | 0.276 | 0.097 | 3.68E-10 | 13 Vamp3         |
| 2.92E-14 | 0.343187186  | 0.925 | 0.622 | 3.85E-10 | 13 Uba52         |
| 3.77E-14 | 0.262928865  | 0.603 | 0.272 | 4.97E-10 | 13 Tra2b         |
| 4.50E-14 | -1.145830265 | 0.266 | 0.457 | 5.94E-10 | 13 Alox5ap       |
| 5.60E-14 | -1.130245018 | 0.312 | 0.483 | 7.38E-10 | 13 F630028O10Rik |
| 6.00E-14 | 0.302995462  | 0.834 | 0.463 | 7.91E-10 | 13 Rpl27-ps3     |
| 8.75E-14 | -1.610847544 | 0.146 | 0.367 | 1.15E-09 | 13 Ifitm6        |
| 1.82E-13 | 0.269943779  | 0.945 | 0.688 | 2.40E-09 | 13 Rpl10         |
| 2.75E-13 | -1.325950131 | 0.161 | 0.37  | 3.62E-09 | 13 Lst1          |
| 3.50E-13 | -0.642763267 | 0.849 | 0.768 | 4.62E-09 | 13 B2m           |
| 9.88E-13 | 0.344311581  | 0.844 | 0.503 | 1.30E-08 | 13 Cox6a1        |
| 1.30E-12 | 0.314463565  | 0.829 | 0.471 | 1.71E-08 | 13 Uqcrh         |
| 1.32E-12 | 0.369007203  | 0.935 | 0.646 | 1.75E-08 | 13 mt-Co2        |
| 1.38E-12 | -1.438442962 | 0.276 | 0.434 | 1.82E-08 | 13 Anxa1         |
| 1.68E-12 | 0.291467439  | 0.819 | 0.442 | 2.22E-08 | 13 Uqcr10        |
| 2.08E-12 | -1.988025333 | 0.533 | 0.559 | 2.75E-08 | 13 Lcn2          |
| 2.36E-12 | -1.398271968 | 0.352 | 0.482 | 3.12E-08 | 13 Lgals1        |
| 3.11E-12 | -1.207555992 | 0.131 | 0.334 | 4.11E-08 | 13 Cd53          |
| 3.51E-12 | 0.291017128  | 0.884 | 0.534 | 4.63E-08 | 13 Hspa8         |
| 4.14E-12 | 0.264685962  | 0.739 | 0.387 | 5.47E-08 | 13 Tomm7         |
| 4.59E-12 | 0.310794124  | 0.874 | 0.482 | 6.05E-08 | 13 Pcbp2         |
| 5.13E-12 | -1.665024901 | 0.322 | 0.452 | 6.77E-08 | 13 Pglyrp1       |
| 6.68E-12 | -1.463152767 | 0.668 | 0.636 | 8.82E-08 | 13 Crip1         |
| 9.41E-12 | 0.303770742  | 0.804 | 0.439 | 1.24E-07 | 13 Hnrnpa3       |
| 1.17E-11 | -1.921713431 | 0.729 | 0.627 | 1.54E-07 | 13 Wfdc21        |
| 1.45E-11 | -0.983351719 | 0.382 | 0.493 | 1.91E-07 | 13 Arpc2         |
| 2.00E-11 | -1.164334343 | 0.497 | 0.545 | 2.63E-07 | 13 Psap          |
| 2.27E-11 | -1.300000062 | 0.302 | 0.443 | 2.99E-07 | 13 Lgals3        |



|          |              |       |       |             |              |
|----------|--------------|-------|-------|-------------|--------------|
| 3.86E-11 | -1.067415405 | 0.146 | 0.338 | 5.09E-07    | 13 Clec12a   |
| 4.49E-11 | -1.314358132 | 0.07  | 0.263 | 5.93E-07    | 13 Gm9844    |
| 4.84E-11 | 0.285642078  | 0.91  | 0.602 | 6.38E-07    | 13 Gm11808   |
| 9.65E-11 | -0.964010897 | 0.342 | 0.468 | 1.27E-06    | 13 Rac2      |
| 6.07E-10 | 0.260580481  | 0.859 | 0.523 | 8.01E-06    | 13 Atp5k     |
| 7.83E-10 | -1.022536969 | 0.121 | 0.298 | 1.03E-05    | 13 Pkm       |
| 1.06E-09 | 0.278746411  | 0.894 | 0.558 | 1.40E-05    | 13 Hnrnpa2b1 |
| 1.16E-09 | -1.063329235 | 0.085 | 0.261 | 1.53E-05    | 13 Vim       |
| 1.18E-09 | -1.160347587 | 0.09  | 0.263 | 1.55E-05    | 13 Cebpb     |
| 1.55E-09 | -1.082190914 | 0.101 | 0.272 | 2.04E-05    | 13 Cotl1     |
| 3.04E-09 | -1.224355895 | 0.161 | 0.322 | 4.01E-05    | 13 Ms4a6c    |
| 8.39E-09 | -1.067701658 | 0.101 | 0.263 | 0.000110634 | 13 Lmo4      |
| 1.43E-08 | -0.841925062 | 0.608 | 0.576 | 0.00018875  | 13 H2-D1     |
| 2.68E-08 | -1.546681971 | 0.236 | 0.363 | 0.000353601 | 13 Ifi2712a  |
| 2.82E-08 | -0.940415674 | 0.211 | 0.353 | 0.000371879 | 13 Ptpn18    |
| 5.48E-08 | -0.753338345 | 0.583 | 0.554 | 0.000722984 | 13 Calm1     |
| 1.03E-07 | -0.883097471 | 0.653 | 0.585 | 0.00135736  | 13 Hmgn2     |
| 1.08E-07 | -1.041488251 | 0.146 | 0.284 | 0.001420505 | 13 Lcp1      |
| 1.33E-07 | -1.056356153 | 0.131 | 0.27  | 0.001748052 | 13 Clec4a2   |
| 1.43E-07 | -1.692349705 | 0.593 | 0.54  | 0.001886789 | 13 Ltf       |
| 1.63E-07 | -0.932062779 | 0.146 | 0.285 | 0.002150319 | 13 Myl12b    |
| 2.98E-07 | -1.012045459 | 0.126 | 0.26  | 0.003925332 | 13 Anxa2     |
| 3.73E-07 | -1.057237508 | 0.201 | 0.32  | 0.004918669 | 13 Lsp1      |
| 3.90E-07 | -0.405724048 | 0.839 | 0.711 | 0.005149553 | 13 Cfl1      |
| 5.79E-07 | -0.99073131  | 0.201 | 0.319 | 0.007638333 | 13 Ptprc     |
| 8.37E-07 | -0.861807166 | 0.136 | 0.268 | 0.011040066 | 13 Ncf1      |
| 3.84E-06 | -0.879169602 | 0.226 | 0.326 | 0.050695817 | 13 Celf2     |
| 4.53E-06 | -0.898700726 | 0.286 | 0.368 | 0.059693889 | 13 Gsr       |
| 6.15E-06 | -0.996472548 | 0.191 | 0.294 | 0.081082408 | 13 Mgst1     |
| 6.63E-06 | -0.850722118 | 0.276 | 0.358 | 0.087475101 | 13 Fam49b    |
| 6.73E-06 | -0.314507775 | 0.91  | 0.775 | 0.088836342 | 13 Serf2     |

|            |              |       |       |             |            |
|------------|--------------|-------|-------|-------------|------------|
| 7.47E-06   | -0.871814627 | 0.291 | 0.368 | 0.098501568 | 13 Emp3    |
| 9.81E-06   | -0.90765355  | 0.352 | 0.398 | 0.129411822 | 13 Dstn    |
| 1.16E-05   | -1.124982135 | 0.176 | 0.277 | 0.153664278 | 13 Ccr2    |
| 1.91E-05   | -0.725265916 | 0.518 | 0.489 | 0.252183527 | 13 Gnai2   |
| 2.32E-05   | -0.750682908 | 0.372 | 0.418 | 0.306114915 | 13 Cdc42   |
| 3.70E-05   | -0.829345022 | 0.286 | 0.355 | 0.48822139  | 13 Msrb1   |
| 5.46E-05   | -0.777040178 | 0.367 | 0.399 | 0.720559486 | 13 Actr3   |
| 8.50E-05   | -0.718443495 | 0.417 | 0.432 | 1           | 13 Tspo    |
| 8.88E-05   | -0.807624797 | 0.322 | 0.369 | 1           | 13 Capza2  |
| 0.00010148 | -0.328464516 | 0.884 | 0.771 | 1           | 13 H3f3a   |
| 0.00018128 | -0.915682396 | 0.226 | 0.296 | 1           | 13 Sat1    |
| 0.00023722 | -0.898698241 | 0.206 | 0.281 | 1           | 13 Slpi    |
| 0.00025323 | -0.784066795 | 0.286 | 0.338 | 1           | 13 Clic1   |
| 0.00042551 | -0.813858927 | 0.286 | 0.327 | 1           | 13 Lamtor4 |
| 0.00066892 | -0.274276255 | 0.322 | 0.181 | 1           | 13 Samhd1  |
| 0.00096463 | -1.202403824 | 0.216 | 0.274 | 1           | 13 Prtn3   |
| 0.00101901 | -0.787254316 | 0.241 | 0.295 | 1           | 13 Laptm5  |
| 0.00147178 | -0.254020166 | 0.422 | 0.243 | 1           | 13 Sec11c  |
| 0.00160933 | -0.676521618 | 0.492 | 0.44  | 1           | 13 Actr2   |
| 0.00178532 | -0.274509354 | 0.327 | 0.189 | 1           | 13 R3hdm4  |
| 0.00209414 | -0.772893997 | 0.196 | 0.253 | 1           | 13 Psmb8   |
| 0.00245127 | -0.479638842 | 0.633 | 0.539 | 1           | 13 Ubb     |
| 0.0029823  | -0.74416011  | 0.236 | 0.28  | 1           | 13 Iqgap1  |
| 0.00319739 | -0.253618707 | 0.402 | 0.24  | 1           | 13 Pgl3    |
| 0.00359906 | -0.252847756 | 0.402 | 0.239 | 1           | 13 Scand1  |
| 0.00362011 | -0.696919213 | 0.226 | 0.276 | 1           | 13 Aldh2   |
| 0.00376379 | -0.712500189 | 0.226 | 0.27  | 1           | 13 Gpi1    |
| 0.00382053 | -0.723110765 | 0.432 | 0.402 | 1           | 13 Dbi     |
| 0.00426097 | -0.720067873 | 0.211 | 0.257 | 1           | 13 Flna    |
| 0.00478977 | -0.740345445 | 0.563 | 0.466 | 1           | 13 Ly6e    |
| 0.00562657 | -0.284666677 | 0.397 | 0.237 | 1           | 13 Zfp36l2 |

|            |              |       |       |           |             |         |
|------------|--------------|-------|-------|-----------|-------------|---------|
| 0.00570629 | -0.508879524 | 0.658 | 0.532 | 1         | 13 Mrpl33   |         |
| 0.00644451 | -0.867584936 | 0.211 | 0.251 | 1         | 13 Tmcc1    |         |
| 0.00767072 | -0.271174622 | 0.362 | 0.22  | 1         | 13 Krtcap2  |         |
| 0          | 3.704401026  | 0.811 | 0.051 | 0         | 14 Ccl5     | NK cell |
| 0          | 2.867954177  | 0.849 | 0.068 | 0         | 14 AW112010 |         |
| 0          | 1.894545332  | 0.378 | 0.004 | 0         | 14 Klre1    |         |
| 1.73E-295  | 2.053616497  | 0.486 | 0.017 | 2.29E-291 | 14 Ms4a4b   |         |
| 8.74E-274  | 1.662068667  | 0.319 | 0.005 | 1.15E-269 | 14 Gimap4   |         |
| 3.80E-273  | 2.528164299  | 0.422 | 0.013 | 5.01E-269 | 14 Gzma     |         |
| 2.45E-266  | 1.781701077  | 0.335 | 0.007 | 3.24E-262 | 14 Klrk1    |         |
| 5.00E-194  | 1.856840933  | 0.514 | 0.036 | 6.59E-190 | 14 Klrd1    |         |
| 6.46E-138  | 2.080505891  | 0.741 | 0.136 | 8.52E-134 | 14 Nkg7     |         |
| 1.40E-54   | 1.272813378  | 0.416 | 0.087 | 1.84E-50  | 14 Ptprcap  |         |
| 1.38E-51   | 1.324755407  | 0.514 | 0.139 | 1.82E-47  | 14 Id2      |         |
| 6.83E-44   | 1.415572347  | 0.373 | 0.086 | 9.00E-40  | 14 Ccnd2    |         |
| 2.06E-38   | 0.592842993  | 1     | 0.955 | 2.71E-34  | 14 Rps27    |         |
| 1.09E-34   | 0.522065957  | 1     | 0.997 | 1.44E-30  | 14 Malat1   |         |
| 2.45E-32   | -1.203219805 | 0.654 | 0.913 | 3.23E-28  | 14 Lyz2     |         |
| 3.61E-32   | 1.056815844  | 0.649 | 0.306 | 4.76E-28  | 14 Ptprc    |         |
| 7.67E-30   | 1.008299282  | 0.254 | 0.056 | 1.01E-25  | 14          | 1-Sep   |
| 1.31E-29   | 1.034316445  | 0.357 | 0.103 | 1.73E-25  | 14 Shisa5   |         |
| 2.27E-29   | 0.617454793  | 0.968 | 0.804 | 2.99E-25  | 14 Rpl13a   |         |
| 2.71E-29   | 0.647379451  | 0.962 | 0.841 | 3.58E-25  | 14 Rps27rt  |         |
| 4.13E-29   | 0.556683314  | 0.984 | 0.733 | 5.45E-25  | 14 Tmsb10   |         |
| 1.15E-26   | -0.901679092 | 0.405 | 0.755 | 1.52E-22  | 14 Gpx1     |         |
| 5.24E-26   | 0.956596168  | 0.643 | 0.35  | 6.91E-22  | 14 H2-K1    |         |
| 2.68E-24   | 1.051146741  | 0.351 | 0.118 | 3.53E-20  | 14 Jak1     |         |
| 6.61E-24   | 0.548300645  | 0.951 | 0.803 | 8.73E-20  | 14 Rps16    |         |
| 5.61E-23   | 0.49630201   | 0.973 | 0.848 | 7.39E-19  | 14 Rpl13    |         |
| 5.64E-23   | 0.965236811  | 0.438 | 0.179 | 7.43E-19  | 14 Hcst     |         |
| 1.26E-21   | 0.600040016  | 0.908 | 0.744 | 1.66E-17  | 14 Rps15a   |         |

|          |              |       |       |          |    |         |
|----------|--------------|-------|-------|----------|----|---------|
| 1.16E-20 | -1.007712629 | 0.4   | 0.692 | 1.53E-16 | 14 | Plac8   |
| 3.28E-20 | 0.561624866  | 0.914 | 0.717 | 4.33E-16 | 14 | Rplp1   |
| 1.58E-19 | 0.515753435  | 0.935 | 0.76  | 2.08E-15 | 14 | Rpl36   |
| 2.02E-19 | 0.773398565  | 0.551 | 0.287 | 2.66E-15 | 14 | Pdcd4   |
| 3.79E-19 | 0.401458641  | 0.995 | 0.937 | 5.00E-15 | 14 | Rpl37a  |
| 3.57E-18 | 0.525742093  | 0.876 | 0.653 | 4.71E-14 | 14 | Eef1a1  |
| 6.59E-18 | 0.364726805  | 0.995 | 0.954 | 8.70E-14 | 14 | Rpl41   |
| 8.14E-18 | 0.50644942   | 0.946 | 0.815 | 1.07E-13 | 14 | Rpl23a  |
| 9.39E-18 | 0.444717524  | 0.93  | 0.801 | 1.24E-13 | 14 | Rps24   |
| 1.94E-17 | 0.387712344  | 0.989 | 0.878 | 2.56E-13 | 14 | Rps14   |
| 2.00E-17 | -1.076509863 | 0.249 | 0.568 | 2.63E-13 | 14 | Ifitm3  |
| 2.73E-17 | -0.825184444 | 0.346 | 0.654 | 3.60E-13 | 14 | Prdx5   |
| 1.92E-16 | -1.01914592  | 0.195 | 0.51  | 2.54E-12 | 14 | Cybb    |
| 2.90E-16 | 0.482616156  | 0.957 | 0.846 | 3.83E-12 | 14 | Rpl38   |
| 3.24E-16 | 0.432522219  | 0.941 | 0.833 | 4.27E-12 | 14 | Rps18   |
| 3.29E-16 | 0.865153375  | 0.292 | 0.109 | 4.33E-12 | 14 | Ets1    |
| 9.50E-16 | -0.572585217 | 0.514 | 0.788 | 1.25E-11 | 14 | Shfm1   |
| 2.16E-15 | 0.496402153  | 0.87  | 0.686 | 2.85E-11 | 14 | Rps7    |
| 4.52E-15 | 0.45444195   | 0.903 | 0.781 | 5.96E-11 | 14 | Rps5    |
| 1.06E-14 | 0.439863565  | 0.892 | 0.757 | 1.39E-10 | 14 | Rps3    |
| 3.84E-14 | 0.40271929   | 0.957 | 0.865 | 5.06E-10 | 14 | Rpl32   |
| 6.28E-14 | -0.858205993 | 0.168 | 0.459 | 8.28E-10 | 14 | Alox5ap |
| 8.67E-14 | -0.838508782 | 0.389 | 0.639 | 1.14E-09 | 14 | Cst3    |
| 1.21E-13 | 0.396168106  | 0.951 | 0.806 | 1.60E-09 | 14 | Rps23   |
| 1.32E-13 | 0.430071279  | 0.908 | 0.72  | 1.74E-09 | 14 | Rps4x   |
| 1.62E-13 | 0.469180701  | 0.827 | 0.679 | 2.13E-09 | 14 | Rpsa    |
| 2.45E-13 | 0.679214856  | 0.465 | 0.248 | 3.23E-09 | 14 | Btg1    |
| 3.10E-13 | 0.464402562  | 0.811 | 0.626 | 4.09E-09 | 14 | Uba52   |
| 3.89E-13 | -0.937943094 | 0.141 | 0.404 | 5.13E-09 | 14 | Dstn    |
| 4.08E-13 | 0.447119101  | 0.876 | 0.717 | 5.38E-09 | 14 | Rpl27a  |
| 4.46E-13 | 0.443639219  | 0.849 | 0.675 | 5.88E-09 | 14 | Rpl27   |

|          |              |       |       |          |               |
|----------|--------------|-------|-------|----------|---------------|
| 4.50E-13 | 0.4378195    | 0.876 | 0.726 | 5.93E-09 | 14 Cd52       |
| 5.26E-13 | -1.11522098  | 0.405 | 0.637 | 6.94E-09 | 14 Wfdc21     |
| 1.08E-12 | 0.382532885  | 0.903 | 0.802 | 1.42E-08 | 14 Rpl34      |
| 1.74E-12 | 0.380528662  | 0.941 | 0.773 | 2.30E-08 | 14 Rplp2      |
| 2.03E-12 | -0.911015228 | 0.319 | 0.559 | 2.68E-08 | 14 Chil3      |
| 2.82E-12 | -0.664647044 | 0.314 | 0.589 | 3.72E-08 | 14 S100a11    |
| 3.36E-12 | 0.43890105   | 0.849 | 0.638 | 4.43E-08 | 14 Rpl36a     |
| 5.00E-12 | 0.329463712  | 0.978 | 0.9   | 6.59E-08 | 14 Rpl37      |
| 5.02E-12 | -0.70102124  | 0.368 | 0.622 | 6.63E-08 | 14 Ly6c2      |
| 5.97E-12 | 0.35066874   | 0.978 | 0.871 | 7.87E-08 | 14 Rpl18a     |
| 7.99E-12 | 0.481627277  | 0.778 | 0.64  | 1.05E-07 | 14 Rpl18      |
| 8.33E-12 | -0.56760005  | 0.67  | 0.825 | 1.10E-07 | 14 Ftl1       |
| 9.40E-12 | 0.472142707  | 0.762 | 0.57  | 1.24E-07 | 14 Rpl10a     |
| 1.25E-11 | -0.963232641 | 0.13  | 0.371 | 1.64E-07 | 14 Lst1       |
| 1.52E-11 | 0.462002935  | 0.827 | 0.719 | 2.01E-07 | 14 Rpl19      |
| 1.68E-11 | 0.49404916   | 0.811 | 0.667 | 2.21E-07 | 14 Rpl23a-ps3 |
| 1.69E-11 | 0.432136745  | 0.859 | 0.687 | 2.23E-07 | 14 Rps13      |
| 1.93E-11 | 0.311207906  | 0.995 | 0.898 | 2.54E-07 | 14 Rps28      |
| 2.63E-11 | -0.774528499 | 0.211 | 0.462 | 3.47E-07 | 14 Hp         |
| 2.67E-11 | 0.458100956  | 0.789 | 0.643 | 3.53E-07 | 14 Rpl8       |
| 3.95E-11 | 0.338327055  | 0.897 | 0.743 | 5.21E-07 | 14 Rps6       |
| 4.02E-11 | 0.339088795  | 0.865 | 0.768 | 5.30E-07 | 14 B2m        |
| 4.44E-11 | 0.35522076   | 0.941 | 0.79  | 5.86E-07 | 14 Rps11      |
| 4.85E-11 | 0.365503136  | 0.903 | 0.759 | 6.40E-07 | 14 Rpl17      |
| 6.87E-11 | -1.13978552  | 1     | 0.999 | 9.06E-07 | 14 S100a8     |
| 8.82E-11 | -1.068021017 | 0.73  | 0.853 | 1.16E-06 | 14 Ngp        |
| 2.05E-10 | 0.424067639  | 0.762 | 0.607 | 2.71E-06 | 14 Gm11808    |
| 2.17E-10 | -1.150254161 | 0.984 | 0.995 | 2.86E-06 | 14 S100a9     |
| 2.17E-10 | -0.781057234 | 0.124 | 0.347 | 2.87E-06 | 14 Ifitm2     |
| 2.49E-10 | 0.301341984  | 0.984 | 0.854 | 3.28E-06 | 14 Rpl35      |
| 3.29E-10 | 0.376122066  | 0.838 | 0.707 | 4.34E-06 | 14 Rplp0      |

|          |              |       |       |             |    |               |
|----------|--------------|-------|-------|-------------|----|---------------|
| 4.80E-10 | 0.402867192  | 0.827 | 0.704 | 6.33E-06    | 14 | Tpt1          |
| 5.15E-10 | 0.438213445  | 0.773 | 0.595 | 6.80E-06    | 14 | Rpl3          |
| 5.20E-10 | 0.42565012   | 0.805 | 0.703 | 6.86E-06    | 14 | Sub1          |
| 7.28E-10 | -0.627980436 | 0.378 | 0.594 | 9.60E-06    | 14 | Hmgn2         |
| 7.79E-10 | -0.914685207 | 0.108 | 0.323 | 1.03E-05    | 14 | Ms4a6c        |
| 9.67E-10 | -1.061990526 | 0.914 | 0.932 | 1.27E-05    | 14 | Camp          |
| 1.27E-09 | -0.790844202 | 0.124 | 0.338 | 1.67E-05    | 14 | Clec12a       |
| 1.28E-09 | -0.772373345 | 0.335 | 0.549 | 1.68E-05    | 14 | Psap          |
| 2.06E-09 | 0.570720948  | 0.557 | 0.399 | 2.71E-05    | 14 | Rpl36-ps3     |
| 2.08E-09 | 0.348852742  | 0.897 | 0.749 | 2.74E-05    | 14 | Gm10076       |
| 2.46E-09 | 0.382366275  | 0.773 | 0.654 | 3.25E-05    | 14 | Rps10         |
| 2.58E-09 | -1.005401761 | 0.162 | 0.366 | 3.40E-05    | 14 | Ifitm6        |
| 7.98E-09 | 0.337140605  | 0.87  | 0.741 | 0.000105226 | 14 | Rps15         |
| 8.61E-09 | -0.787429538 | 0.243 | 0.444 | 0.000113571 | 14 | Lgals3        |
| 1.22E-08 | 0.554042541  | 0.427 | 0.259 | 0.000160821 | 14 | S100a10       |
| 1.41E-08 | 0.376378374  | 0.827 | 0.714 | 0.000186525 | 14 | Rpl11         |
| 1.49E-08 | -0.882628779 | 0.389 | 0.563 | 0.000196068 | 14 | Lcn2          |
| 1.53E-08 | -0.411836673 | 0.6   | 0.78  | 0.000202081 | 14 | H3f3a         |
| 1.63E-08 | 0.334454569  | 0.708 | 0.573 | 0.000215409 | 14 | H2-D1         |
| 1.66E-08 | 0.499867096  | 0.595 | 0.43  | 0.000218797 | 14 | Gm9493        |
| 1.99E-08 | -0.646928177 | 0.276 | 0.484 | 0.000262621 | 14 | F630028O10Rik |
| 2.20E-08 | -0.767443956 | 0.108 | 0.302 | 0.000290453 | 14 | Cd24a         |
| 2.33E-08 | -0.474659245 | 0.454 | 0.654 | 0.000307683 | 14 | Itm2b         |
| 2.88E-08 | 0.666734779  | 0.368 | 0.223 | 0.00038036  | 14 | Nme1          |
| 3.17E-08 | -0.68048813  | 0.092 | 0.28  | 0.000418356 | 14 | Aldh2         |
| 3.42E-08 | 0.320596394  | 0.892 | 0.765 | 0.000451124 | 14 | Rpl21         |
| 4.22E-08 | 0.472522476  | 0.6   | 0.435 | 0.000556463 | 14 | Gm10073       |
| 6.77E-08 | 0.333511234  | 0.897 | 0.834 | 0.00089359  | 14 | Pfn1          |
| 7.83E-08 | 0.28379876   | 0.87  | 0.769 | 0.001032863 | 14 | Rps3a1        |
| 8.21E-08 | 0.412806905  | 0.627 | 0.47  | 0.001083198 | 14 | Rpl27-ps3     |
| 1.19E-07 | 0.408653922  | 0.416 | 0.253 | 0.001563777 | 14 | Gm9844        |

|          |              |       |       |             |    |           |
|----------|--------------|-------|-------|-------------|----|-----------|
| 1.29E-07 | -0.553038224 | 0.254 | 0.456 | 0.001698031 | 14 | Atpif1    |
| 1.39E-07 | 0.448511506  | 0.568 | 0.431 | 0.001835509 | 14 | Rpl13-ps3 |
| 1.42E-07 | -0.649021843 | 0.178 | 0.369 | 0.001876072 | 14 | Serp1     |
| 1.45E-07 | 0.572879061  | 0.341 | 0.204 | 0.00191841  | 14 | Limd2     |
| 1.62E-07 | -0.607222993 | 0.151 | 0.338 | 0.00213789  | 14 | Notch2    |
| 1.82E-07 | 0.429614486  | 0.686 | 0.576 | 0.002395687 | 14 | Rpl15     |
| 2.20E-07 | 0.381975855  | 0.627 | 0.465 | 0.002905437 | 14 | Gm8730    |
| 2.90E-07 | 0.349521316  | 0.827 | 0.743 | 0.003819541 | 14 | Rpl9      |
| 3.00E-07 | 0.298984009  | 0.843 | 0.681 | 0.003962204 | 14 | Rpl14     |
| 3.37E-07 | -0.683740201 | 0.124 | 0.296 | 0.004447417 | 14 | Mgst1     |
| 3.77E-07 | 0.347349849  | 0.708 | 0.55  | 0.004971315 | 14 | Rps2      |
| 4.44E-07 | 0.486417874  | 0.389 | 0.247 | 0.005853145 | 14 | Psmb8     |
| 6.08E-07 | 0.333172106  | 0.735 | 0.604 | 0.008018544 | 14 | Rps21     |
| 6.25E-07 | 0.254907386  | 0.897 | 0.773 | 0.008241589 | 14 | Rpl39     |
| 6.29E-07 | -0.614540078 | 0.195 | 0.371 | 0.00829447  | 14 | Gsr       |
| 6.34E-07 | 0.369673284  | 0.627 | 0.48  | 0.008360613 | 14 | Rpl12     |
| 6.52E-07 | -0.844726293 | 0.195 | 0.364 | 0.008603158 | 14 | Ifi2712a  |
| 8.85E-07 | -1.192148088 | 0.119 | 0.274 | 0.011678019 | 14 | Mpo       |
| 8.94E-07 | -0.613996719 | 0.259 | 0.434 | 0.011787017 | 14 | Anxa1     |
| 9.10E-07 | -0.907029822 | 0.411 | 0.545 | 0.012002599 | 14 | Ltf       |
| 1.06E-06 | -0.671344264 | 0.103 | 0.262 | 0.013995429 | 14 | Lmo4      |
| 1.47E-06 | 0.403596008  | 0.627 | 0.502 | 0.01942587  | 14 | Rpl22l1   |
| 1.54E-06 | 0.281104794  | 0.832 | 0.67  | 0.020258675 | 14 | Gm2000    |
| 1.58E-06 | -0.52886779  | 0.162 | 0.331 | 0.020897921 | 14 | Lamtor4   |
| 1.77E-06 | 0.358523561  | 0.751 | 0.66  | 0.023354829 | 14 | Rps20     |
| 1.86E-06 | 0.327734877  | 0.735 | 0.586 | 0.024508641 | 14 | Wdr89     |
| 2.07E-06 | 0.533533554  | 0.281 | 0.16  | 0.027348492 | 14 | Sepw1     |
| 2.53E-06 | -1.086075464 | 0.13  | 0.277 | 0.03339859  | 14 | Prtn3     |
| 2.63E-06 | 0.303713693  | 0.822 | 0.719 | 0.034633425 | 14 | Rpl6      |
| 3.20E-06 | 0.254887     | 0.859 | 0.741 | 0.042274855 | 14 | Rpl24     |
| 3.46E-06 | 0.327232325  | 0.757 | 0.643 | 0.045587134 | 14 | Gm10263   |

|          |              |       |       |             |    |           |
|----------|--------------|-------|-------|-------------|----|-----------|
| 3.98E-06 | 0.42117046   | 0.476 | 0.344 | 0.05247782  | 14 | Ptpn18    |
| 4.16E-06 | -0.579058153 | 0.2   | 0.358 | 0.054925353 | 14 | Msrb1     |
| 4.91E-06 | 0.553252092  | 0.27  | 0.157 | 0.064745436 | 14 | Itgal     |
| 5.48E-06 | -0.661147516 | 0.124 | 0.27  | 0.072224461 | 14 | Clec4a2   |
| 8.80E-06 | 0.257660958  | 0.789 | 0.655 | 0.116105547 | 14 | Rps12     |
| 9.22E-06 | 0.466744827  | 0.524 | 0.424 | 0.121574432 | 14 | Eef2      |
| 9.64E-06 | -0.71956025  | 0.324 | 0.451 | 0.127113036 | 14 | Pglyrp1   |
| 9.76E-06 | 0.496976579  | 0.314 | 0.198 | 0.128724465 | 14 | Psme1     |
| 1.02E-05 | -0.411429702 | 0.146 | 0.309 | 0.135152443 | 14 | Taldo1    |
| 1.26E-05 | -0.375130585 | 0.546 | 0.688 | 0.165746169 | 14 | Cyba      |
| 1.27E-05 | -0.317610236 | 0.135 | 0.283 | 0.167967591 | 14 | Slpi      |
| 1.28E-05 | -0.515684465 | 0.119 | 0.263 | 0.16839583  | 14 | Aprt      |
| 1.28E-05 | 0.316767084  | 0.611 | 0.474 | 0.168503011 | 14 | Lgals1    |
| 1.50E-05 | -0.465152699 | 0.135 | 0.285 | 0.197998277 | 14 | Anapc13   |
| 1.56E-05 | 0.538573699  | 0.33  | 0.217 | 0.205437987 | 14 | Selplg    |
| 1.68E-05 | -0.445025614 | 0.211 | 0.379 | 0.221815044 | 14 | Tmem256   |
| 1.94E-05 | -0.424209753 | 0.265 | 0.428 | 0.256147478 | 14 | Tkt       |
| 1.97E-05 | -0.581883795 | 0.13  | 0.267 | 0.259742587 | 14 | Ncf1      |
| 2.31E-05 | -0.561271229 | 0.178 | 0.326 | 0.305075787 | 14 | Npc2      |
| 2.36E-05 | 0.340588815  | 0.578 | 0.502 | 0.311860215 | 14 | Mbnl1     |
| 2.41E-05 | -0.417321567 | 0.168 | 0.331 | 0.317300912 | 14 | Cks2      |
| 2.49E-05 | -0.310087025 | 0.67  | 0.783 | 0.328073778 | 14 | Hmgb2     |
| 2.56E-05 | -0.325334731 | 0.368 | 0.541 | 0.337167441 | 14 | Mrpl33    |
| 2.69E-05 | 0.252723887  | 0.849 | 0.738 | 0.354477411 | 14 | Rpl23     |
| 2.95E-05 | -0.439670424 | 0.189 | 0.337 | 0.388589775 | 14 | Irf2bp2   |
| 3.39E-05 | -0.378820583 | 0.227 | 0.395 | 0.446998544 | 14 | Smdt1     |
| 3.39E-05 | -0.416450601 | 0.2   | 0.358 | 0.44754345  | 14 | Atp6v0e   |
| 3.93E-05 | 0.400399942  | 0.6   | 0.466 | 0.517758106 | 14 | Rps18-ps3 |
| 4.02E-05 | -0.560904761 | 0.4   | 0.536 | 0.52999585  | 14 | S100a6    |
| 4.70E-05 | 0.358948495  | 0.33  | 0.209 | 0.620608631 | 14 | Ahnak     |
| 4.79E-05 | -0.463513349 | 0.173 | 0.323 | 0.631825183 | 14 | Gm10116   |



|            |              |       |       |             |    |          |
|------------|--------------|-------|-------|-------------|----|----------|
| 5.95E-05   | 0.357431806  | 0.557 | 0.435 | 0.784997257 | 14 | Gnb2l1   |
| 8.38E-05   | -0.373497517 | 0.189 | 0.331 | 1           | 14 | Ap3s1    |
| 0.0001262  | -0.577606748 | 0.141 | 0.261 | 1           | 14 | Cebpb    |
| 0.00014819 | -0.394219502 | 0.232 | 0.372 | 1           | 14 | Capza2   |
| 0.00014912 | 0.446697127  | 0.292 | 0.198 | 1           | 14 | Hmha1    |
| 0.00015512 | -0.342807493 | 0.151 | 0.292 | 1           | 14 | Sdcbp    |
| 0.00016537 | -0.419958405 | 0.168 | 0.296 | 1           | 14 | Pkm      |
| 0.00016678 | 0.41301706   | 0.384 | 0.281 | 1           | 14 | Eef1g    |
| 0.00018617 | -0.450752663 | 0.135 | 0.261 | 1           | 14 | Gm10282  |
| 0.00021616 | -0.385119548 | 0.146 | 0.273 | 1           | 14 | Gpi1     |
| 0.00021652 | 0.32702318   | 0.562 | 0.462 | 1           | 14 | Rpl30    |
| 0.00021655 | 0.253458185  | 0.811 | 0.692 | 1           | 14 | Rpl10    |
| 0.00023015 | -0.348001753 | 0.141 | 0.274 | 1           | 14 | Aldoa    |
| 0.0002886  | -0.299599776 | 0.227 | 0.374 | 1           | 14 | Myeov2   |
| 0.00031049 | -0.338910132 | 0.319 | 0.455 | 1           | 14 | Uqcr11   |
| 0.00040799 | 0.420804438  | 0.47  | 0.402 | 1           | 14 | Pfdn5    |
| 0.00050235 | -0.34679751  | 0.319 | 0.452 | 1           | 14 | Psm7     |
| 0.00050502 | 0.301025166  | 0.524 | 0.446 | 1           | 14 | Rpl9-ps6 |
| 0.00050572 | 0.300528158  | 0.557 | 0.461 | 1           | 14 | Rac2     |
| 0.00050643 | 0.258388693  | 0.643 | 0.542 | 1           | 14 | Hspa8    |
| 0.00055036 | -0.310404197 | 0.195 | 0.322 | 1           | 14 | Top2a    |
| 0.00064148 | -0.335256925 | 0.276 | 0.415 | 1           | 14 | Atox1    |
| 0.00064614 | -0.355924242 | 0.173 | 0.297 | 1           | 14 | Ppp1cb   |
| 0.00077148 | 0.475651908  | 0.308 | 0.227 | 1           | 14 | Sell     |
| 0.0008127  | 0.283207225  | 0.524 | 0.428 | 1           | 14 | Rpl5     |
| 0.00091044 | 0.323494993  | 0.649 | 0.568 | 1           | 14 | mt-Nd4   |
| 0.00106518 | 0.352305324  | 0.33  | 0.243 | 1           | 14 | Fxyd5    |
| 0.00115494 | -0.294578589 | 0.346 | 0.494 | 1           | 14 | Gnai2    |
| 0.00120957 | -0.297040144 | 0.173 | 0.29  | 1           | 14 | Ndufv3   |
| 0.00127156 | -0.31137765  | 0.178 | 0.297 | 1           | 14 | Nap1l1   |
| 0.00142406 | -0.272020769 | 0.389 | 0.511 | 1           | 14 | Sec61b   |

|            |              |       |       |   |    |         |
|------------|--------------|-------|-------|---|----|---------|
| 0.0016568  | -0.285371105 | 0.249 | 0.371 | 1 | 14 | Dek     |
| 0.00179645 | -0.299250964 | 0.232 | 0.352 | 1 | 14 | Vamp8   |
| 0.0020138  | -0.290134661 | 0.292 | 0.418 | 1 | 14 | Gapdh   |
| 0.00206554 | -0.362729602 | 0.184 | 0.287 | 1 | 14 | Cd44    |
| 0.00215674 | -0.474393915 | 0.162 | 0.253 | 1 | 14 | Tmcc1   |
| 0.00228756 | -0.419750653 | 0.243 | 0.348 | 1 | 14 | H2afy   |
| 0.00236986 | 0.250730949  | 0.605 | 0.546 | 1 | 14 | Rpl7    |
| 0.00238393 | 0.430058618  | 0.308 | 0.233 | 1 | 14 | Abhd2   |
| 0.00280948 | 0.2577653    | 0.438 | 0.354 | 1 | 14 | Gm42418 |
| 0.00374175 | 0.301817923  | 0.27  | 0.192 | 1 | 14 | Ywhaq   |
| 0.00386862 | 0.403801424  | 0.368 | 0.3   | 1 | 14 | Myl12a  |
| 0.00468398 | 0.317684171  | 0.411 | 0.349 | 1 | 14 | Rpl6l   |
| 0.00476843 | 0.386058951  | 0.314 | 0.237 | 1 | 14 | Pycard  |
| 0.00480911 | -0.311609192 | 0.162 | 0.259 | 1 | 14 | Flna    |
| 0.0050104  | -0.33383826  | 0.232 | 0.338 | 1 | 14 | Hnrnpa1 |
| 0.00554081 | 0.350560692  | 0.276 | 0.208 | 1 | 14 | Dad1    |
| 0.00581459 | -0.356817524 | 0.195 | 0.284 | 1 | 14 | Myl12b  |
| 0.00739335 | -0.269178546 | 0.162 | 0.254 | 1 | 14 | Ndufb3  |

|           |              |       |       |           |    |          |
|-----------|--------------|-------|-------|-----------|----|----------|
| 0         | 2.591873469  | 0.633 | 0.009 | 0         | 15 | Ebf1     |
| 0         | 2.576918097  | 0.586 | 0.016 | 0         | 15 | Vpreb3   |
| 0         | 1.944254021  | 0.539 | 0.01  | 0         | 15 | Cd79a    |
| 7.50E-248 | 1.343925773  | 0.266 | 0.003 | 9.89E-244 | 15 | Pou2af1  |
| 2.06E-238 | 1.59877493   | 0.273 | 0.003 | 2.72E-234 | 15 | Myl4     |
| 1.66E-113 | 1.837911193  | 0.312 | 0.016 | 2.19E-109 | 15 | Mzb1     |
| 2.05E-113 | 1.650392673  | 0.359 | 0.022 | 2.70E-109 | 15 | Cd79b    |
| 2.83E-90  | 1.626583177  | 0.398 | 0.037 | 3.74E-86  | 15 | Chchd10  |
| 9.17E-40  | 1.110673437  | 0.273 | 0.038 | 1.21E-35  | 15 | Pafah1b3 |
| 1.88E-35  | 1.130032038  | 0.5   | 0.126 | 2.47E-31  | 15 | Ly6d     |
| 1.19E-21  | 0.990592992  | 0.336 | 0.091 | 1.57E-17  | 15 | Ptprcap  |
| 5.11E-17  | 0.943402238  | 0.586 | 0.29  | 6.74E-13  | 15 | Cd24a    |
| 7.50E-16  | -0.815784974 | 0.578 | 0.82  | 9.89E-12  | 15 | Tyrobp   |

**B cell**

|          |              |       |       |             |                  |
|----------|--------------|-------|-------|-------------|------------------|
| 1.18E-15 | -0.445377956 | 1     | 0.996 | 1.56E-11    | 15 Tmsb4x        |
| 2.77E-15 | 0.79310773   | 0.406 | 0.153 | 3.66E-11    | 15 Cd74          |
| 1.39E-14 | 0.889380555  | 0.352 | 0.13  | 1.84E-10    | 15 Dnajc7        |
| 2.08E-14 | 0.819843309  | 0.375 | 0.14  | 2.74E-10    | 15 Foxp1         |
| 2.49E-14 | 0.526226815  | 1     | 0.997 | 3.28E-10    | 15 Malat1        |
| 2.01E-12 | -0.67275869  | 0.453 | 0.719 | 2.65E-08    | 15 Fcer1g        |
| 3.03E-11 | 0.644768488  | 0.953 | 0.84  | 3.99E-07    | 15 Ptma          |
| 1.91E-10 | -0.712881314 | 0.828 | 0.907 | 2.52E-06    | 15 Lyz2          |
| 8.36E-10 | 0.886691808  | 0.766 | 0.689 | 1.10E-05    | 15 Hmgb1         |
| 8.76E-10 | 0.751745928  | 0.312 | 0.135 | 1.16E-05    | 15 Paip2         |
| 4.71E-09 | 0.336822827  | 0.992 | 0.956 | 6.21E-05    | 15 Rps27         |
| 4.94E-09 | 0.688344561  | 0.578 | 0.372 | 6.52E-05    | 15 H2afv         |
| 6.73E-09 | 0.355844564  | 0.938 | 0.842 | 8.88E-05    | 15 Rps27rt       |
| 3.07E-08 | 0.69219566   | 0.281 | 0.119 | 0.000405303 | 15 Mef2c         |
| 3.71E-08 | 0.708829757  | 0.266 | 0.115 | 0.000488847 | 15 Hmgn1         |
| 6.98E-08 | -0.895292261 | 0.359 | 0.556 | 0.000920268 | 15 Chil3         |
| 1.67E-07 | 0.653096552  | 0.273 | 0.124 | 0.00220417  | 15 Dnajc9        |
| 1.70E-07 | 0.748114862  | 0.297 | 0.139 | 0.002240667 | 15 Pim1          |
| 2.23E-07 | 0.523268005  | 0.438 | 0.245 | 0.002939086 | 15 Rbm25         |
| 2.23E-07 | 0.66325689   | 0.367 | 0.201 | 0.002944583 | 15 Zfp706        |
| 3.58E-07 | 0.334569057  | 0.875 | 0.7   | 0.004722098 | 15 mt-Cytb       |
| 4.66E-07 | -0.649378924 | 0.258 | 0.482 | 0.006147936 | 15 F630028O10Rik |
| 7.15E-07 | -0.712079804 | 0.258 | 0.458 | 0.00943799  | 15 Hp            |
| 8.75E-07 | -0.867694295 | 0.375 | 0.562 | 0.011546545 | 15 Ifitm3        |
| 1.26E-06 | -0.744723767 | 0.133 | 0.336 | 0.01665931  | 15 Clec12a       |
| 1.81E-06 | 0.282570119  | 0.922 | 0.774 | 0.023830777 | 15 Rpl39         |
| 2.25E-06 | -0.756134144 | 0.25  | 0.442 | 0.029680489 | 15 Lgals3        |
| 2.61E-06 | -0.528876929 | 0.492 | 0.648 | 0.034407159 | 15 Prdx5         |
| 3.09E-06 | -0.545414549 | 0.414 | 0.585 | 0.040774902 | 15 S100a11       |
| 3.68E-06 | -0.549455585 | 0.32  | 0.505 | 0.048573295 | 15 Cybb          |
| 5.35E-06 | -0.346432474 | 0.664 | 0.782 | 0.070550111 | 15 Serf2         |

|            |              |       |       |             |              |
|------------|--------------|-------|-------|-------------|--------------|
| 7.23E-06   | 0.723658072  | 0.367 | 0.227 | 0.095356313 | 15 Anp32e    |
| 8.54E-06   | 0.314295271  | 0.797 | 0.634 | 0.112586941 | 15 Xist      |
| 1.38E-05   | 0.561675083  | 0.32  | 0.178 | 0.181864773 | 15 Myb       |
| 1.41E-05   | 0.488375984  | 0.445 | 0.28  | 0.18627863  | 15 Luc7l2    |
| 1.56E-05   | 0.526019664  | 0.305 | 0.167 | 0.206132371 | 15 Cbx1      |
| 1.60E-05   | -0.379625563 | 0.609 | 0.747 | 0.211154815 | 15 Gpx1      |
| 1.91E-05   | 0.490910569  | 0.258 | 0.131 | 0.251394347 | 15 Ctcf      |
| 2.56E-05   | 0.598100833  | 0.547 | 0.41  | 0.337706353 | 15 Stmn1     |
| 2.57E-05   | -0.694130192 | 0.281 | 0.451 | 0.339084845 | 15 Pglyrp1   |
| 2.98E-05   | 0.358205162  | 0.859 | 0.773 | 0.393190996 | 15 H3f3a     |
| 3.17E-05   | 0.560155873  | 0.406 | 0.251 | 0.418501202 | 15 Btg1      |
| 3.63E-05   | -0.453901311 | 0.477 | 0.617 | 0.478533014 | 15 Ly6c2     |
| 4.06E-05   | 0.304845528  | 0.727 | 0.567 | 0.534956295 | 15 mt-Nd4    |
| 4.23E-05   | -0.337105924 | 0.688 | 0.782 | 0.557861251 | 15 Shfm1     |
| 5.59E-05   | 0.431502908  | 0.32  | 0.185 | 0.73742333  | 15 Pnir      |
| 5.62E-05   | -0.579166905 | 0.266 | 0.433 | 0.741613089 | 15 Anxa1     |
| 5.65E-05   | 0.648392697  | 0.367 | 0.238 | 0.744649437 | 15 Ube2s     |
| 5.87E-05   | 0.507175351  | 0.312 | 0.181 | 0.774285465 | 15 Erdr1     |
| 6.59E-05   | 0.495973289  | 0.469 | 0.333 | 0.869722435 | 15 Nucks1    |
| 6.60E-05   | -0.731577875 | 0.508 | 0.633 | 0.870518729 | 15 Wfdc21    |
| 7.59E-05   | -0.527268544 | 0.391 | 0.539 | 1           | 15 Mrpl33    |
| 7.80E-05   | 0.791860371  | 0.5   | 0.383 | 1           | 15 Hist1h2ap |
| 7.97E-05   | -0.324664082 | 0.75  | 0.822 | 1           | 15 Ftl1      |
| 8.80E-05   | -0.554121409 | 0.305 | 0.454 | 1           | 15 Alox5ap   |
| 9.70E-05   | -0.712755921 | 0.352 | 0.48  | 1           | 15 Lgals1    |
| 0.0001073  | 0.419018742  | 0.562 | 0.425 | 1           | 15 Rbm3      |
| 0.00011249 | -0.367738687 | 1     | 0.999 | 1           | 15 Actb      |
| 0.00011251 | 0.4881586    | 0.359 | 0.224 | 1           | 15 Nme1      |
| 0.0001226  | -0.49394202  | 0.164 | 0.322 | 1           | 15 Gm10116   |
| 0.00013627 | 0.609658616  | 0.445 | 0.316 | 1           | 15 Top2a     |
| 0.00014363 | -0.529256195 | 0.211 | 0.369 | 1           | 15 Gsr       |

|            |              |       |       |   |             |
|------------|--------------|-------|-------|---|-------------|
| 0.00014514 | 0.258568212  | 0.852 | 0.707 | 1 | 15 Rpl28    |
| 0.00015344 | 0.470042299  | 0.391 | 0.256 | 1 | 15 Ucp2     |
| 0.00017808 | 0.480056395  | 0.258 | 0.146 | 1 | 15 Phip     |
| 0.00019674 | 0.351804949  | 0.352 | 0.212 | 1 | 15 Pdap1    |
| 0.0002073  | -0.538099913 | 0.25  | 0.399 | 1 | 15 Dstn     |
| 0.00021378 | 0.576422004  | 0.336 | 0.215 | 1 | 15 Mki67    |
| 0.00022164 | -0.498803282 | 0.406 | 0.546 | 1 | 15 Psap     |
| 0.00023933 | 0.279562113  | 0.594 | 0.441 | 1 | 15 Ddx5     |
| 0.00026811 | 0.651600822  | 0.266 | 0.161 | 1 | 15 H2afx    |
| 0.00028506 | -0.345806316 | 0.594 | 0.686 | 1 | 15 Cyba     |
| 0.00032985 | 0.287230856  | 0.719 | 0.588 | 1 | 15 Rpl4     |
| 0.00037274 | 0.352435905  | 0.281 | 0.165 | 1 | 15 Mtdh     |
| 0.00040083 | 0.550609947  | 0.359 | 0.243 | 1 | 15 Pgl3     |
| 0.00049085 | -0.71031787  | 0.234 | 0.363 | 1 | 15 Ifitm6   |
| 0.00050317 | -0.579115776 | 0.133 | 0.26  | 1 | 15 Cebpb    |
| 0.00053066 | 0.506093635  | 0.266 | 0.163 | 1 | 15 Ppp1cc   |
| 0.00063053 | -0.329642392 | 0.586 | 0.695 | 1 | 15 Sh3bgrl3 |
| 0.00063751 | -0.529371301 | 0.133 | 0.258 | 1 | 15 Flna     |
| 0.00068172 | 0.310444882  | 0.391 | 0.26  | 1 | 15 Snrpd2   |
| 0.00072237 | 0.372288445  | 0.812 | 0.74  | 1 | 15 H3f3b    |
| 0.00089203 | -0.3234751   | 0.562 | 0.686 | 1 | 15 Plac8    |
| 0.00096216 | -0.529947235 | 0.242 | 0.368 | 1 | 15 Emp3     |
| 0.00100209 | -0.611841049 | 0.43  | 0.544 | 1 | 15 Ltf      |
| 0.00104312 | 0.38182268   | 0.492 | 0.365 | 1 | 15 Tuba1b   |
| 0.00106265 | 0.31627421   | 0.57  | 0.449 | 1 | 15 Usmg5    |
| 0.00120809 | 0.358258531  | 0.258 | 0.156 | 1 | 15 Tra2a    |
| 0.00126104 | 0.35593752   | 0.328 | 0.213 | 1 | 15 Atrx     |
| 0.00129211 | 0.346625606  | 0.305 | 0.194 | 1 | 15 Smc4     |
| 0.00129785 | -0.349335785 | 0.227 | 0.372 | 1 | 15 Myh9     |
| 0.00130001 | 0.318322226  | 0.766 | 0.704 | 1 | 15 Sub1     |
| 0.00133231 | 0.345829272  | 0.273 | 0.169 | 1 | 15 Ube2b    |

|            |              |       |       |   |                  |
|------------|--------------|-------|-------|---|------------------|
| 0.00137812 | 0.542321104  | 0.43  | 0.331 | 1 | 15 2810417H13Rik |
| 0.00138345 | -0.701992568 | 1     | 0.999 | 1 | 15 S100a8        |
| 0.00154358 | 0.343035082  | 0.461 | 0.339 | 1 | 15 Set           |
| 0.00157595 | 0.476766234  | 0.281 | 0.183 | 1 | 15 Lockd         |
| 0.001653   | 0.355802123  | 0.289 | 0.181 | 1 | 15 2310036O22Rik |
| 0.00166688 | -0.275012776 | 0.586 | 0.688 | 1 | 15 Actg1         |
| 0.00168817 | 0.278827991  | 0.375 | 0.25  | 1 | 15 Timm13        |
| 0.00169852 | 0.383147079  | 0.312 | 0.203 | 1 | 15 Ikzf1         |
| 0.00172384 | -0.431967136 | 0.195 | 0.33  | 1 | 15 Ap3s1         |
| 0.00176293 | 0.516947827  | 0.344 | 0.237 | 1 | 15 Pycard        |
| 0.00188961 | -0.326875805 | 0.602 | 0.666 | 1 | 15 Arhgdib       |
| 0.00195461 | 0.372689529  | 0.258 | 0.161 | 1 | 15 Rtf1          |
| 0.00202179 | 0.27695026   | 0.656 | 0.523 | 1 | 15 Rpl22         |
| 0.00204845 | -0.39927462  | 0.312 | 0.447 | 1 | 15 Arpc1b        |
| 0.00215133 | 0.383721962  | 0.469 | 0.371 | 1 | 15 Srrm2         |
| 0.00216271 | 0.380479494  | 0.266 | 0.17  | 1 | 15 Adrbk1        |
| 0.00231752 | 0.311746474  | 0.398 | 0.279 | 1 | 15 Hnrnpab       |
| 0.00234806 | 0.293686244  | 0.555 | 0.429 | 1 | 15 Serinc3       |
| 0.00237098 | 0.387785742  | 0.391 | 0.282 | 1 | 15 Nsa2          |
| 0.00242536 | -0.741656785 | 0.828 | 0.85  | 1 | 15 Ngp           |
| 0.00260084 | 0.32788292   | 0.43  | 0.315 | 1 | 15 Eef1b2        |
| 0.00273359 | -0.282234911 | 0.617 | 0.711 | 1 | 15 Myl6          |
| 0.00276193 | 0.298005537  | 0.523 | 0.406 | 1 | 15 Rbm39         |
| 0.00277637 | 0.280639439  | 0.562 | 0.432 | 1 | 15 Rpl13-ps3     |
| 0.00283906 | -0.37193332  | 0.312 | 0.434 | 1 | 15 Tspo          |
| 0.00301091 | 0.397913762  | 0.289 | 0.193 | 1 | 15 St13          |
| 0.00320953 | 0.528352744  | 0.617 | 0.559 | 1 | 15 Calm2         |
| 0.0033598  | 0.338141015  | 0.273 | 0.175 | 1 | 15 Slbp          |
| 0.00354852 | -0.966364212 | 0.18  | 0.275 | 1 | 15 Prtn3         |
| 0.00373364 | 0.363634493  | 0.375 | 0.268 | 1 | 15 Romo1         |
| 0.00408663 | -0.540408971 | 0.211 | 0.319 | 1 | 15 Ms4a6c        |

|            |              |       |       |   |    |          |
|------------|--------------|-------|-------|---|----|----------|
| 0.00422954 | 0.386835689  | 0.578 | 0.496 | 1 | 15 | Tubb5    |
| 0.00425655 | -0.432554283 | 0.172 | 0.283 | 1 | 15 | Myl12b   |
| 0.00428179 | 0.268746492  | 0.406 | 0.297 | 1 | 15 | Atp5g2   |
| 0.00435421 | -0.34161178  | 0.555 | 0.651 | 1 | 15 | Itm2b    |
| 0.00487921 | 0.310013063  | 0.305 | 0.206 | 1 | 15 | Hnrnpd   |
| 0.00501501 | 0.301921815  | 0.258 | 0.167 | 1 | 15 | Rbbp4    |
| 0.00547776 | 0.274945555  | 0.547 | 0.416 | 1 | 15 | Hsp90ab1 |
| 0.00583276 | 0.288486095  | 0.328 | 0.225 | 1 | 15 | Psm2     |
| 0.00586676 | 0.337215526  | 0.57  | 0.507 | 1 | 15 | Cbx3     |
| 0.0060025  | 0.254379473  | 0.422 | 0.312 | 1 | 15 | Eif3k    |
| 0.00603252 | 0.33311841   | 0.258 | 0.171 | 1 | 15 | Cenpa    |
| 0.00639235 | -0.432482261 | 0.164 | 0.268 | 1 | 15 | Cotl1    |
| 0.00689936 | -0.835029433 | 0.172 | 0.272 | 1 | 15 | Mpo      |
| 0.00699956 | -0.376616813 | 0.547 | 0.634 | 1 | 15 | Cst3     |
| 0.00714262 | 0.386955478  | 0.258 | 0.171 | 1 | 15 | U2af1    |
| 0.00729056 | 0.337021545  | 0.43  | 0.336 | 1 | 15 | Srsf3    |
| 0.0083245  | 0.32225369   | 0.508 | 0.401 | 1 | 15 | Rbx1     |
| 0.00861108 | 0.292144387  | 0.477 | 0.374 | 1 | 15 | Btf3     |
| 0.00889578 | -0.495753306 | 0.18  | 0.276 | 1 | 15 | Ccr2     |
| 0.00899742 | 0.346928732  | 0.469 | 0.361 | 1 | 15 | Serp1    |
| 0.00928026 | -0.3495025   | 0.227 | 0.328 | 1 | 15 | Lamtor4  |
| 0.0095063  | 0.524357296  | 0.289 | 0.205 | 1 | 15 | Birc5    |

|           |             |       |       |           |    |        |
|-----------|-------------|-------|-------|-----------|----|--------|
| 0         | 2.939350322 | 0.847 | 0.01  | 0         | 16 | Cpa3   |
| 0         | 2.34928309  | 0.605 | 0.005 | 0         | 16 | Ms4a2  |
| 0         | 1.763654053 | 0.323 | 0.002 | 0         | 16 | Fcer1a |
| 4.94E-296 | 1.75261457  | 0.403 | 0.007 | 6.52E-292 | 16 | Csrp3  |
| 8.17E-288 | 4.687911158 | 0.823 | 0.05  | 1.08E-283 | 16 | Prss34 |
| 1.96E-282 | 5.256454258 | 0.887 | 0.063 | 2.59E-278 | 16 | Mcpt8  |
| 2.69E-244 | 1.92224622  | 0.492 | 0.017 | 3.54E-240 | 16 | Gata2  |
| 1.41E-138 | 2.20151892  | 0.532 | 0.042 | 1.86E-134 | 16 | Ifitm1 |
| 2.76E-127 | 1.336061282 | 0.347 | 0.017 | 3.64E-123 | 16 | Edem3  |

**Basophils**

|          |              |       |       |          |    |            |
|----------|--------------|-------|-------|----------|----|------------|
| 4.95E-98 | 1.35473123   | 0.339 | 0.022 | 6.53E-94 | 16 | Ikzf2      |
| 7.98E-56 | 1.618553887  | 0.726 | 0.213 | 1.05E-51 | 16 | Cd63       |
| 2.61E-53 | 1.446120163  | 0.621 | 0.146 | 3.44E-49 | 16 | Ctsg       |
| 2.55E-43 | 1.118898022  | 0.282 | 0.036 | 3.37E-39 | 16 | Ptprs      |
| 2.05E-37 | 1.1690288    | 0.395 | 0.08  | 2.70E-33 | 16 | Nedd4      |
| 6.86E-37 | 1.333265348  | 0.298 | 0.047 | 9.04E-33 | 16 | Spry2      |
| 1.39E-33 | 1.201167784  | 0.597 | 0.193 | 1.83E-29 | 16 | Srgn       |
| 6.52E-33 | 1.229712454  | 0.435 | 0.107 | 8.60E-29 | 16 | Runx1      |
| 5.10E-31 | 1.167547869  | 0.629 | 0.236 | 6.73E-27 | 16 | Calr       |
| 1.78E-28 | 1.150515796  | 0.323 | 0.068 | 2.35E-24 | 16 | Hdc        |
| 8.24E-28 | 0.685320678  | 0.702 | 0.262 | 1.09E-23 | 16 | Mpo        |
| 2.28E-27 | -1.500383643 | 0.718 | 0.91  | 3.00E-23 | 16 | Lyz2       |
| 1.00E-25 | 0.599385363  | 0.992 | 0.846 | 1.32E-21 | 16 | Rpl38      |
| 1.26E-25 | 1.082566793  | 0.395 | 0.107 | 1.67E-21 | 16 | Gng12      |
| 2.34E-25 | 1.028624909  | 0.371 | 0.095 | 3.08E-21 | 16 | Fam46a     |
| 2.48E-24 | 1.170709538  | 0.597 | 0.251 | 3.28E-20 | 16 | Lmo4       |
| 7.68E-24 | 1.019362852  | 0.331 | 0.081 | 1.01E-19 | 16 | Igf1r      |
| 4.18E-23 | 0.707072365  | 0.944 | 0.679 | 5.51E-19 | 16 | Plac8      |
| 8.82E-22 | 1.012216473  | 0.347 | 0.096 | 1.16E-17 | 16 | Pdia4      |
| 1.13E-21 | -1.491438223 | 0.21  | 0.622 | 1.49E-17 | 16 | Ly6c2      |
| 8.41E-20 | 0.958014813  | 0.266 | 0.064 | 1.11E-15 | 16 | Nucb1      |
| 7.03E-18 | 0.924681254  | 0.387 | 0.133 | 9.28E-14 | 16 | Csgalnact2 |
| 8.13E-17 | -1.618364967 | 0.202 | 0.559 | 1.07E-12 | 16 | Chil3      |
| 4.74E-15 | 0.550935145  | 0.823 | 0.471 | 6.25E-11 | 16 | Lgals1     |
| 5.92E-15 | 1.032169576  | 0.306 | 0.1   | 7.80E-11 | 16 | Hyou1      |
| 1.78E-14 | -1.453504817 | 0.21  | 0.538 | 2.34E-10 | 16 | S100a6     |
| 6.98E-14 | 0.859265435  | 0.444 | 0.199 | 9.20E-10 | 16 | Ssr4       |
| 1.13E-13 | 0.786392027  | 0.589 | 0.322 | 1.49E-09 | 16 | Ap3s1      |
| 1.15E-13 | 0.976888235  | 0.444 | 0.2   | 1.52E-09 | 16 | Hspa5      |
| 1.26E-13 | 0.845742633  | 0.371 | 0.146 | 1.66E-09 | 16 | Manf       |
| 1.74E-13 | 0.791628072  | 0.597 | 0.336 | 2.30E-09 | 16 | Hsp90b1    |



|          |              |       |       |          |    |         |
|----------|--------------|-------|-------|----------|----|---------|
| 2.90E-13 | 0.627779938  | 0.75  | 0.463 | 3.82E-09 | 16 | Ly6e    |
| 4.81E-13 | 0.407147016  | 0.952 | 0.802 | 6.35E-09 | 16 | Rps24   |
| 5.76E-13 | 0.991890536  | 0.306 | 0.11  | 7.60E-09 | 16 | Ets1    |
| 5.86E-13 | 0.40600554   | 0.968 | 0.842 | 7.72E-09 | 16 | Rps27rt |
| 7.38E-13 | 0.375455056  | 0.984 | 0.791 | 9.74E-09 | 16 | Rps11   |
| 9.08E-13 | 0.458809375  | 0.952 | 0.773 | 1.20E-08 | 16 | Rpl39   |
| 1.14E-12 | 0.371292246  | 0.992 | 0.9   | 1.50E-08 | 16 | Rpl37   |
| 2.20E-12 | -1.123314802 | 0.21  | 0.507 | 2.90E-08 | 16 | Cybb    |
| 5.17E-12 | -0.788860304 | 0.435 | 0.689 | 6.81E-08 | 16 | Cyba    |
| 1.07E-11 | 0.333201226  | 1     | 0.937 | 1.41E-07 | 16 | Rpl37a  |
| 1.21E-11 | 0.320256052  | 0.992 | 0.956 | 1.59E-07 | 16 | Rps27   |
| 1.53E-11 | 0.660966022  | 0.548 | 0.3   | 2.01E-07 | 16 | Tsix    |
| 1.94E-11 | -1.144114359 | 0.266 | 0.549 | 2.56E-07 | 16 | Psap    |
| 2.10E-11 | 0.618711602  | 0.532 | 0.279 | 2.77E-07 | 16 | Cmtm7   |
| 2.42E-11 | 0.538596342  | 0.274 | 0.093 | 3.19E-07 | 16 | Ptprcap |
| 2.74E-11 | -0.778502883 | 0.524 | 0.734 | 3.62E-07 | 16 | Cd52    |
| 3.82E-11 | 0.463653957  | 0.339 | 0.13  | 5.03E-07 | 16 | Apoe    |
| 4.42E-11 | 0.428912924  | 0.911 | 0.691 | 5.83E-07 | 16 | Rpl10   |
| 4.76E-11 | -1.571954659 | 0.298 | 0.546 | 6.27E-07 | 16 | Ltf     |
| 5.34E-11 | 0.409781927  | 0.976 | 0.807 | 7.04E-07 | 16 | Rps23   |
| 1.05E-10 | 0.429296678  | 0.895 | 0.738 | 1.39E-06 | 16 | Rpl23   |
| 2.13E-10 | 0.44377789   | 0.911 | 0.67  | 2.81E-06 | 16 | Gm2000  |
| 3.24E-10 | 0.441453186  | 0.871 | 0.64  | 4.27E-06 | 16 | Rpl36a  |
| 8.21E-10 | 0.384929827  | 0.984 | 0.833 | 1.08E-05 | 16 | Rps8    |
| 8.27E-10 | -1.462404662 | 0.879 | 0.932 | 1.09E-05 | 16 | Camp    |
| 8.35E-10 | 0.692425728  | 0.427 | 0.221 | 1.10E-05 | 16 | Krtcap2 |
| 1.47E-09 | -0.940956285 | 0.194 | 0.46  | 1.94E-05 | 16 | Hp      |
| 1.53E-09 | -1.456837705 | 0.46  | 0.633 | 2.01E-05 | 16 | Wfdc21  |
| 1.54E-09 | 0.347090278  | 0.984 | 0.856 | 2.03E-05 | 16 | Rpl35   |
| 1.80E-09 | 0.701296967  | 0.403 | 0.204 | 2.37E-05 | 16 | Fam107b |
| 1.82E-09 | -1.553579238 | 0.371 | 0.562 | 2.40E-05 | 16 | Lcn2    |

|          |              |       |       |             |    |         |
|----------|--------------|-------|-------|-------------|----|---------|
| 2.01E-09 | -1.473124244 | 1     | 0.999 | 2.66E-05    | 16 | S100a8  |
| 2.32E-09 | 0.600102646  | 0.5   | 0.277 | 3.06E-05    | 16 | Myl12b  |
| 2.65E-09 | -0.672992211 | 0.403 | 0.65  | 3.49E-05    | 16 | Prdx5   |
| 4.67E-09 | 0.670613727  | 0.347 | 0.158 | 6.16E-05    | 16 | Ms4a3   |
| 4.83E-09 | 0.331981822  | 0.992 | 0.865 | 6.37E-05    | 16 | Rpl32   |
| 5.38E-09 | 0.692668513  | 0.427 | 0.222 | 7.09E-05    | 16 | Cxcr4   |
| 5.96E-09 | -0.660598148 | 0.435 | 0.669 | 7.87E-05    | 16 | Arhgdib |
| 6.01E-09 | 0.466880109  | 0.782 | 0.634 | 7.93E-05    | 16 | Xist    |
| 6.08E-09 | 0.736502361  | 0.331 | 0.154 | 8.01E-05    | 16 | Cdk6    |
| 7.87E-09 | -1.012124024 | 0.048 | 0.288 | 0.000103793 | 16 | Cd44    |
| 1.04E-08 | 0.291597838  | 1     | 0.899 | 0.000137426 | 16 | Rps28   |
| 1.16E-08 | 0.450100797  | 0.339 | 0.15  | 0.000153239 | 16 | Nkg7    |
| 1.59E-08 | -0.465999278 | 0.605 | 0.784 | 0.000209689 | 16 | Shfm1   |
| 1.59E-08 | 0.652509069  | 0.282 | 0.119 | 0.000209923 | 16 | Ankrd12 |
| 1.87E-08 | -1.583453059 | 0.839 | 0.85  | 0.000246184 | 16 | Ngp     |
| 4.64E-08 | 0.334972829  | 0.903 | 0.766 | 0.000611657 | 16 | Rpl21   |
| 5.04E-08 | 0.2989321    | 0.968 | 0.895 | 0.000664829 | 16 | Rps19   |
| 6.59E-08 | 0.618928433  | 0.306 | 0.141 | 0.000869759 | 16 | Mat2a   |
| 1.04E-07 | 0.675399811  | 0.323 | 0.157 | 0.001372794 | 16 | Rgs18   |
| 1.18E-07 | -1.178409499 | 0.145 | 0.364 | 0.001558359 | 16 | Ifitm6  |
| 1.28E-07 | -0.821050114 | 0.169 | 0.401 | 0.001692394 | 16 | Dstn    |
| 1.52E-07 | 0.317924261  | 0.944 | 0.817 | 0.002004183 | 16 | Rpl23a  |
| 1.77E-07 | 0.637709161  | 0.347 | 0.175 | 0.002333109 | 16 | Mpc2    |
| 1.84E-07 | 0.326191383  | 0.887 | 0.687 | 0.002421968 | 16 | Rps7    |
| 2.36E-07 | 0.289344602  | 0.96  | 0.84  | 0.00311602  | 16 | Ptma    |
| 2.50E-07 | -1.501864946 | 1     | 0.994 | 0.003293985 | 16 | S100a9  |
| 4.42E-07 | 0.623780245  | 0.258 | 0.116 | 0.005836727 | 16 | Spn     |
| 4.67E-07 | 0.605227555  | 0.315 | 0.156 | 0.006164287 | 16 | Sdf2l1  |
| 5.44E-07 | 0.384753666  | 0.815 | 0.641 | 0.007175132 | 16 | Rpl18   |
| 6.38E-07 | -1.061631715 | 0.403 | 0.562 | 0.008421408 | 16 | Ifitm3  |
| 6.85E-07 | 0.527332739  | 0.403 | 0.226 | 0.009035052 | 16 | Spcs2   |

|          |              |       |       |             |               |
|----------|--------------|-------|-------|-------------|---------------|
| 6.89E-07 | 0.448766406  | 0.669 | 0.463 | 0.009088331 | 16 Rpl10-ps3  |
| 7.04E-07 | 0.326738014  | 0.879 | 0.682 | 0.009286834 | 16 Rpl14      |
| 8.16E-07 | 0.543784374  | 0.516 | 0.346 | 0.010760856 | 16 Ndufa1     |
| 8.23E-07 | -0.699345887 | 0.403 | 0.585 | 0.0108529   | 16 S100a11    |
| 1.02E-06 | 0.514964061  | 0.298 | 0.146 | 0.013467339 | 16 Tax1bp1    |
| 1.09E-06 | 0.340894566  | 0.911 | 0.76  | 0.014334595 | 16 Rpl17      |
| 1.11E-06 | 0.329523065  | 0.919 | 0.72  | 0.014577021 | 16 Rps26      |
| 1.13E-06 | -0.814643579 | 0.234 | 0.442 | 0.014897209 | 16 Lgals3     |
| 1.13E-06 | 0.425024626  | 0.669 | 0.471 | 0.014955894 | 16 Rps26-ps1  |
| 1.24E-06 | 0.651509642  | 0.266 | 0.126 | 0.016293471 | 16 Rabac1     |
| 1.43E-06 | 0.514811355  | 0.734 | 0.557 | 0.018920805 | 16 Calm2      |
| 1.59E-06 | 0.431540301  | 0.282 | 0.133 | 0.020919695 | 16 Vimp       |
| 1.80E-06 | 0.317899214  | 0.903 | 0.775 | 0.023794203 | 16 Rplp2      |
| 2.30E-06 | 0.510339369  | 0.629 | 0.463 | 0.030326527 | 16 Cd47       |
| 2.49E-06 | 0.280596345  | 0.911 | 0.803 | 0.032896811 | 16 Rpl34      |
| 2.60E-06 | 0.365947051  | 0.823 | 0.668 | 0.034289143 | 16 Rpl23a-ps3 |
| 2.62E-06 | -0.383586308 | 0.613 | 0.778 | 0.03456261  | 16 H3f3a      |
| 3.22E-06 | 0.269126837  | 0.871 | 0.676 | 0.042525212 | 16 Rpl27      |
| 3.72E-06 | 0.331047388  | 0.855 | 0.701 | 0.04903691  | 16 mt-Cytb    |
| 3.97E-06 | 0.335501237  | 0.71  | 0.48  | 0.052354196 | 16 Rpl12      |
| 4.27E-06 | 0.550000227  | 0.339 | 0.184 | 0.056312973 | 16 Hcst       |
| 6.09E-06 | -0.462442161 | 0.742 | 0.822 | 0.08032407  | 16 Ftl1       |
| 6.28E-06 | 0.493622845  | 0.411 | 0.242 | 0.082890489 | 16 Fxyd5      |
| 7.48E-06 | 0.256813903  | 0.968 | 0.88  | 0.098730392 | 16 Rps14      |
| 7.63E-06 | 0.274830979  | 0.927 | 0.806 | 0.100709053 | 16 Rpl13a     |
| 7.78E-06 | 0.67185989   | 0.29  | 0.155 | 0.102661735 | 16 Rpn1       |
| 8.26E-06 | 0.435959395  | 0.548 | 0.383 | 0.108937351 | 16 Tmem258    |
| 1.01E-05 | 0.480858796  | 0.331 | 0.185 | 0.132714969 | 16 Mrps33     |
| 1.19E-05 | 0.422074218  | 0.403 | 0.244 | 0.15732902  | 16 Anp32a     |
| 1.21E-05 | 0.27889446   | 0.863 | 0.707 | 0.159308561 | 16 Rpl28      |
| 1.23E-05 | 0.292050389  | 0.831 | 0.656 | 0.162755402 | 16 Eef1a1     |

|            |              |       |       |             |    |               |
|------------|--------------|-------|-------|-------------|----|---------------|
| 1.35E-05   | 0.272411893  | 0.871 | 0.747 | 0.177429549 | 16 | Rps15a        |
| 1.41E-05   | 0.459201238  | 0.306 | 0.164 | 0.186143831 | 16 | Ssr3          |
| 2.00E-05   | 0.260128609  | 0.903 | 0.77  | 0.263340893 | 16 | Rps3a1        |
| 2.10E-05   | 0.250924324  | 0.944 | 0.849 | 0.276421131 | 16 | Rpl13         |
| 2.16E-05   | 0.325967765  | 0.766 | 0.587 | 0.285011512 | 16 | Wdr89         |
| 2.93E-05   | -0.699772807 | 0.145 | 0.32  | 0.386398701 | 16 | Lsp1          |
| 3.27E-05   | 0.583683838  | 0.371 | 0.233 | 0.430989167 | 16 | Metap2        |
| 3.56E-05   | 0.441081314  | 0.282 | 0.152 | 0.469108874 | 16 | 1110001J03Rik |
| 3.99E-05   | 0.318252825  | 0.782 | 0.605 | 0.526968742 | 16 | Rps21         |
| 4.34E-05   | -0.808886561 | 0.097 | 0.253 | 0.572813975 | 16 | Tmcc1         |
| 4.69E-05   | 0.423415681  | 0.323 | 0.185 | 0.619239863 | 16 | Hp1bp3        |
| 4.94E-05   | -1.075447558 | 0.21  | 0.362 | 0.651013525 | 16 | lfi27l2a      |
| 5.19E-05   | 0.433769921  | 0.347 | 0.205 | 0.684886745 | 16 | Ppib          |
| 5.61E-05   | 0.268949867  | 0.911 | 0.744 | 0.739663094 | 16 | Rps6          |
| 5.91E-05   | 0.411857856  | 0.347 | 0.207 | 0.779443395 | 16 | Dad1          |
| 6.08E-05   | 0.41168598   | 0.306 | 0.171 | 0.801466086 | 16 | Creg1         |
| 6.33E-05   | 0.425363009  | 0.266 | 0.144 | 0.835203277 | 16 | Morf4l2       |
| 7.32E-05   | 0.325984487  | 0.637 | 0.471 | 0.965456977 | 16 | Rpl27-ps3     |
| 7.65E-05   | 0.488248608  | 0.427 | 0.275 | 1           | 16 | mt-Nd4l       |
| 7.98E-05   | 0.369441609  | 0.653 | 0.466 | 1           | 16 | Rps18-ps3     |
| 9.44E-05   | -0.458309045 | 0.177 | 0.359 | 1           | 16 | Fam49b        |
| 9.80E-05   | 0.542586631  | 0.355 | 0.233 | 1           | 16 | Dpm3          |
| 0.00010764 | -0.559750252 | 0.548 | 0.644 | 1           | 16 | Fth1          |
| 0.00011702 | -0.851892547 | 0.129 | 0.277 | 1           | 16 | Ccr2          |
| 0.00011766 | -0.669694776 | 0.137 | 0.294 | 1           | 16 | Mgst1         |
| 0.00011971 | 0.307528789  | 0.75  | 0.635 | 1           | 16 | Sec61g        |
| 0.00013555 | -0.448919612 | 0.363 | 0.531 | 1           | 16 | Coro1a        |
| 0.0001636  | -0.63587298  | 0.121 | 0.269 | 1           | 16 | Clec4a2       |
| 0.00016668 | 0.250557603  | 0.79  | 0.628 | 1           | 16 | Uba52         |
| 0.00018842 | 0.323649102  | 0.597 | 0.423 | 1           | 16 | Eef2          |
| 0.00019125 | -0.580772051 | 0.202 | 0.367 | 1           | 16 | Lst1          |

|            |              |       |       |   |    |          |
|------------|--------------|-------|-------|---|----|----------|
| 0.00025087 | -0.59367709  | 0.21  | 0.356 | 1 | 16 | Msrb1    |
| 0.00029212 | 0.253132224  | 0.71  | 0.551 | 1 | 16 | Rps2     |
| 0.00029528 | -0.78732171  | 0.185 | 0.32  | 1 | 16 | Ms4a6c   |
| 0.00032667 | 0.335626186  | 0.581 | 0.448 | 1 | 16 | Alox5ap  |
| 0.00037981 | 0.303404371  | 0.581 | 0.431 | 1 | 16 | Gm9493   |
| 0.00040222 | 0.301671862  | 0.363 | 0.218 | 1 | 16 | Gm2a     |
| 0.00040637 | -0.597718786 | 0.153 | 0.299 | 1 | 16 | Cd24a    |
| 0.00050889 | 0.421884944  | 0.274 | 0.163 | 1 | 16 | P4hb     |
| 0.00052039 | -0.430427136 | 0.218 | 0.37  | 1 | 16 | Capza2   |
| 0.00054795 | -0.656966956 | 0.129 | 0.26  | 1 | 16 | Gm9844   |
| 0.00059054 | 0.304404345  | 0.444 | 0.299 | 1 | 16 | Erh      |
| 0.00063533 | 0.3386674    | 0.46  | 0.325 | 1 | 16 | Cd53     |
| 0.00064072 | 0.436549528  | 0.29  | 0.179 | 1 | 16 | Pdia3    |
| 0.00074624 | -0.486115689 | 0.121 | 0.258 | 1 | 16 | Flna     |
| 0.00075009 | -0.41942096  | 0.355 | 0.492 | 1 | 16 | Arpc2    |
| 0.00092204 | 0.342251083  | 0.266 | 0.157 | 1 | 16 | Cd9      |
| 0.00092997 | 0.32122943   | 0.5   | 0.371 | 1 | 16 | Tmem256  |
| 0.00096349 | 0.267740286  | 0.798 | 0.69  | 1 | 16 | Rps13    |
| 0.00098938 | 0.285815863  | 0.548 | 0.424 | 1 | 16 | Hint1    |
| 0.00100065 | 0.277427882  | 0.597 | 0.445 | 1 | 16 | Rpl9-ps6 |
| 0.00107916 | 0.265465519  | 0.726 | 0.567 | 1 | 16 | mt-Nd4   |
| 0.00116965 | 0.371234645  | 0.282 | 0.177 | 1 | 16 | Hypk     |
| 0.00131353 | 0.287083318  | 0.516 | 0.37  | 1 | 16 | Srsf2    |
| 0.00134539 | 0.366503729  | 0.444 | 0.324 | 1 | 16 | Cks2     |
| 0.00147323 | 0.27988226   | 0.403 | 0.281 | 1 | 16 | Gm10269  |
| 0.00148127 | 0.395346349  | 0.282 | 0.179 | 1 | 16 | Myb      |
| 0.00154191 | 0.265869289  | 0.677 | 0.571 | 1 | 16 | Rpl36a1  |
| 0.00192154 | 0.253113271  | 0.629 | 0.505 | 1 | 16 | Sec61b   |
| 0.00224789 | -0.727525793 | 0.371 | 0.449 | 1 | 16 | Pglyrp1  |
| 0.00240034 | -0.497585834 | 0.339 | 0.451 | 1 | 16 | Psm7     |
| 0.00278291 | 0.381783292  | 0.306 | 0.203 | 1 | 16 | Ralbp1   |

|            |              |       |       |           |    |          |                |
|------------|--------------|-------|-------|-----------|----|----------|----------------|
| 0.00279029 | 0.323956625  | 0.331 | 0.225 | 1         | 16 | Nme1     |                |
| 0.00279234 | 0.596069055  | 0.274 | 0.184 | 1         | 16 | Lockd    |                |
| 0.00314146 | -0.300257411 | 0.629 | 0.687 | 1         | 16 | Actg1    |                |
| 0.00345384 | -0.532675117 | 0.234 | 0.347 | 1         | 16 | H2afy    |                |
| 0.00367275 | -0.427023365 | 0.315 | 0.426 | 1         | 16 | Tkt      |                |
| 0.00384608 | -0.420258095 | 0.202 | 0.321 | 1         | 16 | Gm10116  |                |
| 0.00440052 | 0.316271157  | 0.444 | 0.338 | 1         | 16 | Ifitm2   |                |
| 0.00479247 | 0.399055269  | 0.266 | 0.181 | 1         | 16 | Gm6133   |                |
| 0.00509967 | 0.352282617  | 0.355 | 0.255 | 1         | 16 | Lsm6     |                |
| 0.0051579  | 0.33936611   | 0.282 | 0.186 | 1         | 16 | Fkbp2    |                |
| 0.00526412 | 0.258400879  | 0.258 | 0.165 | 1         | 16 | Tmem160  |                |
| 0.00562756 | 0.331899817  | 0.274 | 0.182 | 1         | 16 | Erdr1    |                |
| 0.00667004 | 0.379574546  | 0.29  | 0.197 | 1         | 16 | Al662270 |                |
| 0.00689077 | -0.418611192 | 0.21  | 0.318 | 1         | 16 | Ptprc    |                |
| 0.00706644 | -0.370668788 | 0.177 | 0.289 | 1         | 16 | Psmb1    |                |
| 0.00739546 | -0.407294226 | 0.266 | 0.374 | 1         | 16 | Arpc5    |                |
| 0.00749174 | -0.280809583 | 0.645 | 0.707 | 1         | 16 | Sub1     |                |
| 0.00774308 | -0.336348006 | 0.161 | 0.272 | 1         | 16 | Dazap2   |                |
| 0.00781021 | 0.256681751  | 0.661 | 0.577 | 1         | 16 | Rpl15    |                |
| 0.00815559 | -0.340322956 | 0.218 | 0.324 | 1         | 16 | Npc2     |                |
| 0.00858797 | 0.333604714  | 0.274 | 0.19  | 1         | 16 | Ddx3x    |                |
| 0.00859091 | 0.289982045  | 0.597 | 0.524 | 1         | 16 | Tma7     |                |
| 0.00891283 | -0.454180794 | 0.161 | 0.26  | 1         | 16 | Gm10282  |                |
| 0.00962091 | 0.315469051  | 0.274 | 0.182 | 1         | 16 | Fli1     |                |
| 0          | 3.092423691  | 0.758 | 0.036 | 0         | 17 | H2-Eb1   | Dendritic cell |
| 4.24E-253  | 3.247386381  | 0.887 | 0.071 | 5.59E-249 | 17 | H2-Aa    |                |
| 1.58E-222  | 3.153878119  | 0.847 | 0.074 | 2.09E-218 | 17 | H2-Ab1   |                |
| 2.78E-170  | 3.379056513  | 0.952 | 0.143 | 3.67E-166 | 17 | Cd74     |                |
| 2.15E-125  | 2.08477316   | 0.435 | 0.03  | 2.83E-121 | 17 | Cd209a   |                |
| 4.10E-98   | 1.665582986  | 0.403 | 0.033 | 5.41E-94  | 17 | H2-DMb1  |                |
| 1.59E-42   | 1.19371092   | 0.355 | 0.057 | 2.10E-38  | 17 | Pid1     |                |

|          |              |       |       |          |             |
|----------|--------------|-------|-------|----------|-------------|
| 7.34E-37 | 1.448759657  | 0.298 | 0.048 | 9.68E-33 | 17 Tmem176b |
| 8.99E-36 | 1.391552858  | 0.935 | 0.626 | 1.19E-31 | 17 Cst3     |
| 8.57E-34 | 1.273218807  | 0.435 | 0.106 | 1.13E-29 | 17 H2-DMa   |
| 1.79E-30 | 0.892078448  | 0.952 | 0.631 | 2.36E-26 | 17 Crip1    |
| 2.37E-28 | 1.185309541  | 0.565 | 0.199 | 3.13E-24 | 17 Ctss     |
| 4.02E-28 | 1.182557211  | 0.597 | 0.215 | 5.30E-24 | 17 Wfdc17   |
| 2.57E-27 | 1.00796488   | 0.871 | 0.553 | 3.39E-23 | 17 Ifitm3   |
| 3.96E-25 | 1.122093122  | 0.565 | 0.214 | 5.22E-21 | 17 Gm2a     |
| 3.48E-24 | 1.038131438  | 0.637 | 0.267 | 4.58E-20 | 17 Ccr2     |
| 3.72E-23 | 1.038314936  | 0.726 | 0.352 | 4.90E-19 | 17 Ifi27l2a |
| 1.72E-22 | 0.967100253  | 0.661 | 0.31  | 2.26E-18 | 17 Ms4a6c   |
| 1.80E-22 | -1.71826522  | 0.145 | 0.596 | 2.38E-18 | 17 Hmgn2    |
| 5.06E-20 | -0.98242728  | 0.46  | 0.786 | 6.67E-16 | 17 Hmgb2    |
| 7.51E-19 | 0.62594651   | 0.935 | 0.792 | 9.90E-15 | 17 Rps11    |
| 8.27E-19 | 0.433990428  | 1     | 0.956 | 1.09E-14 | 17 Rps27    |
| 1.97E-18 | 1.046201973  | 0.339 | 0.103 | 2.60E-14 | 17 Marcks   |
| 2.47E-18 | -2.181430686 | 0.177 | 0.566 | 3.26E-14 | 17 Lcn2     |
| 8.50E-18 | 0.77632558   | 0.355 | 0.107 | 1.12E-13 | 17 Rnase6   |
| 1.70E-17 | 0.650402913  | 0.96  | 0.735 | 2.25E-13 | 17 Tmsb10   |
| 4.04E-17 | 0.348334935  | 1     | 0.997 | 5.33E-13 | 17 Malat1   |
| 4.26E-17 | 0.467596411  | 0.976 | 0.871 | 5.61E-13 | 17 Rps9     |
| 1.70E-16 | -1.592121504 | 0.202 | 0.559 | 2.24E-12 | 17 Chil3    |
| 2.32E-16 | 0.487509857  | 0.976 | 0.842 | 3.06E-12 | 17 Rps27rt  |
| 2.73E-16 | 0.487001143  | 0.992 | 0.918 | 3.60E-12 | 17 Fau      |
| 3.31E-16 | 0.735818641  | 0.621 | 0.31  | 4.36E-12 | 17 Lsp1     |
| 4.37E-16 | 0.867444753  | 0.347 | 0.114 | 5.77E-12 | 17 Ly86     |
| 1.91E-15 | 0.685211802  | 0.774 | 0.539 | 2.52E-11 | 17 Psap     |
| 1.17E-14 | 0.416746541  | 0.992 | 0.848 | 1.54E-10 | 17 Rpl13    |
| 2.35E-14 | -1.95267416  | 1     | 0.999 | 3.10E-10 | 17 S100a8   |
| 3.09E-14 | -0.913532607 | 0.323 | 0.651 | 4.08E-10 | 17 Prdx5    |
| 7.22E-14 | -1.594242665 | 0.121 | 0.454 | 9.53E-10 | 17 Pglyrp1  |

|          |              |       |       |             |           |
|----------|--------------|-------|-------|-------------|-----------|
| 1.34E-13 | -1.824137815 | 0.371 | 0.635 | 1.77E-09    | 17 Wfdc21 |
| 3.76E-13 | -2.055017689 | 0.685 | 0.853 | 4.97E-09    | 17 Ngp    |
| 6.84E-13 | 0.535383827  | 0.879 | 0.727 | 9.02E-09    | 17 Cd52   |
| 1.51E-12 | -1.801733858 | 0.274 | 0.546 | 1.99E-08    | 17 Ltf    |
| 4.62E-12 | -1.961576733 | 0.855 | 0.932 | 6.10E-08    | 17 Camp   |
| 6.43E-12 | 0.518994767  | 0.903 | 0.789 | 8.48E-08    | 17 Gm9843 |
| 1.46E-11 | 0.293724759  | 1     | 0.996 | 1.92E-07    | 17 Tmsb4x |
| 1.71E-11 | -0.551275728 | 0.661 | 0.823 | 2.26E-07    | 17 H2afz  |
| 3.79E-11 | -0.965390072 | 0.145 | 0.46  | 5.00E-07    | 17 Hp     |
| 4.07E-11 | 0.898424733  | 0.298 | 0.117 | 5.36E-07    | 17 Mndal  |
| 4.39E-11 | 0.409821579  | 0.935 | 0.802 | 5.79E-07    | 17 Rpl34  |
| 5.36E-11 | 0.792027292  | 0.395 | 0.179 | 7.07E-07    | 17 Ccl6   |
| 5.75E-11 | 0.832456951  | 0.306 | 0.12  | 7.58E-07    | 17 Ifi30  |
| 6.14E-11 | -1.988317851 | 0.984 | 0.995 | 8.11E-07    | 17 S100a9 |
| 7.22E-11 | 0.761483946  | 0.565 | 0.354 | 9.53E-07    | 17 H2-K1  |
| 2.09E-10 | 0.382075404  | 0.952 | 0.873 | 2.76E-06    | 17 Rpl18a |
| 3.23E-10 | -0.821231301 | 0.121 | 0.419 | 4.27E-06    | 17 Stmn1  |
| 6.91E-10 | 0.647526501  | 0.726 | 0.574 | 9.12E-06    | 17 H2-D1  |
| 8.26E-10 | 0.448625905  | 0.855 | 0.704 | 1.09E-05    | 17 Tpt1   |
| 1.29E-09 | 0.922162066  | 0.258 | 0.099 | 1.70E-05    | 17 Ms4a4c |
| 1.66E-09 | 0.367579779  | 0.944 | 0.777 | 2.18E-05    | 17 Rpl26  |
| 1.66E-09 | 0.418954792  | 0.863 | 0.692 | 2.19E-05    | 17 Rpl10  |
| 2.01E-09 | 0.388695031  | 0.952 | 0.818 | 2.65E-05    | 17 Ftl1   |
| 2.02E-09 | 0.396941919  | 0.935 | 0.759 | 2.66E-05    | 17 Rpl17  |
| 2.08E-09 | 0.686864328  | 0.597 | 0.408 | 2.74E-05    | 17 Atox1  |
| 2.41E-09 | 0.711456717  | 0.411 | 0.208 | 3.18E-05    | 17 Ahnak  |
| 2.68E-09 | 0.672755171  | 0.5   | 0.29  | 3.53E-05    | 17 Laptm5 |
| 3.23E-09 | -0.435713499 | 0.315 | 0.62  | 4.25E-05    | 17 Ly6c2  |
| 9.49E-09 | 0.421392069  | 0.831 | 0.64  | 0.000125117 | 17 Rpl18  |
| 1.13E-08 | -0.863434053 | 0.137 | 0.401 | 0.000149384 | 17 Dstn   |
| 1.17E-08 | 0.418003476  | 0.847 | 0.689 | 0.000153743 | 17 Rps13  |



|          |              |       |       |             |                  |
|----------|--------------|-------|-------|-------------|------------------|
| 1.32E-08 | 1.100066697  | 0.29  | 0.13  | 0.000173581 | 17 Apoe          |
| 1.49E-08 | -1.025147352 | 0.097 | 0.338 | 0.000196769 | 17 2810417H13Rik |
| 1.73E-08 | -1.125226335 | 0.145 | 0.39  | 0.000227721 | 17 Hist1h2ap     |
| 3.89E-08 | 0.445977895  | 0.831 | 0.77  | 0.000513257 | 17 B2m           |
| 4.45E-08 | 0.291823653  | 0.944 | 0.88  | 0.000586807 | 17 Rps14         |
| 6.24E-08 | 0.273191374  | 0.984 | 0.895 | 0.000823366 | 17 Rps19         |
| 6.89E-08 | -1.000967646 | 0.048 | 0.262 | 0.000908905 | 17 Gm10282       |
| 6.96E-08 | -0.728181335 | 0.081 | 0.323 | 0.000917635 | 17 Top2a         |
| 7.49E-08 | 0.719770871  | 0.282 | 0.129 | 0.000987874 | 17 Ifi203        |
| 7.71E-08 | 0.624996144  | 0.427 | 0.241 | 0.001016396 | 17 Fxyd5         |
| 1.07E-07 | 0.311910459  | 0.927 | 0.806 | 0.001412314 | 17 Rpl13a        |
| 1.09E-07 | -0.667160837 | 0.21  | 0.469 | 0.001439577 | 17 Rac2          |
| 1.20E-07 | -1.406530528 | 0.065 | 0.277 | 0.001585895 | 17 Prtn3         |
| 1.55E-07 | 0.663269272  | 0.363 | 0.192 | 0.00204891  | 17 Mpeg1         |
| 1.67E-07 | -0.714172968 | 0.137 | 0.37  | 0.002197876 | 17 Gsr           |
| 2.88E-07 | -0.728029026 | 0.073 | 0.295 | 0.003804166 | 17 Mgst1         |
| 3.68E-07 | 0.484359859  | 0.637 | 0.435 | 0.004850918 | 17 Lgals3        |
| 4.21E-07 | 0.525934963  | 0.411 | 0.223 | 0.005557034 | 17 S100a4        |
| 4.23E-07 | 0.356383969  | 0.798 | 0.657 | 0.005581442 | 17 Eef1a1        |
| 5.16E-07 | 0.319700385  | 0.919 | 0.765 | 0.006809621 | 17 Rpl21         |
| 5.21E-07 | 0.253521034  | 1     | 0.937 | 0.00687283  | 17 Rpl37a        |
| 6.31E-07 | 0.6918054    | 0.258 | 0.12  | 0.008322525 | 17 Ccl9          |
| 6.36E-07 | -0.389066408 | 0.573 | 0.785 | 0.008395876 | 17 Shfm1         |
| 6.88E-07 | 0.264447776  | 0.992 | 0.899 | 0.009079035 | 17 Rps28         |
| 1.02E-06 | 0.290336849  | 0.935 | 0.775 | 0.01347024  | 17 Rplp2         |
| 1.02E-06 | -0.851612364 | 0.161 | 0.373 | 0.013513809 | 17 Myh9          |
| 1.35E-06 | -0.6953486   | 0.113 | 0.33  | 0.017747262 | 17 Cks2          |
| 1.44E-06 | 0.506099913  | 0.653 | 0.543 | 0.019015633 | 17 Hspa8         |
| 1.44E-06 | 0.336898143  | 0.919 | 0.718 | 0.019030856 | 17 Rpl6          |
| 1.69E-06 | 0.29395977   | 0.944 | 0.781 | 0.022346039 | 17 Rps5          |
| 1.82E-06 | 0.595162245  | 0.484 | 0.319 | 0.023972997 | 17 Npc2          |

|            |              |       |       |             |                  |
|------------|--------------|-------|-------|-------------|------------------|
| 2.25E-06   | -0.627431223 | 0.153 | 0.38  | 0.029736077 | 17 H2afv         |
| 2.43E-06   | -0.687398341 | 0.121 | 0.331 | 0.032032118 | 17 Ap3s1         |
| 3.61E-06   | 0.337768954  | 0.806 | 0.712 | 0.047554049 | 17 Fcer1g        |
| 5.14E-06   | 0.411242654  | 0.766 | 0.64  | 0.067837109 | 17 Fth1          |
| 5.17E-06   | -0.492422653 | 0.492 | 0.668 | 0.068250599 | 17 Arhgdib       |
| 5.20E-06   | 0.647018655  | 0.266 | 0.136 | 0.068568802 | 17 Samd9l        |
| 5.76E-06   | -0.795003019 | 0.234 | 0.433 | 0.076005972 | 17 Anxa1         |
| 7.80E-06   | 0.311595304  | 0.839 | 0.719 | 0.102900064 | 17 Rpl27a        |
| 9.33E-06   | 0.267600376  | 0.879 | 0.745 | 0.123057043 | 17 Rps6          |
| 9.36E-06   | 0.542819045  | 0.29  | 0.154 | 0.123518502 | 17 Ctsh          |
| 9.53E-06   | 0.263843524  | 0.887 | 0.707 | 0.125726663 | 17 Rplp0         |
| 1.14E-05   | -0.589757219 | 0.274 | 0.482 | 0.149760883 | 17 F630028O10Rik |
| 1.17E-05   | -1.306653858 | 0.105 | 0.273 | 0.153893736 | 17 Mpo           |
| 1.22E-05   | -0.477696919 | 0.242 | 0.474 | 0.160321299 | 17 Txn1          |
| 1.31E-05   | 0.301991748  | 0.895 | 0.806 | 0.173400619 | 17 Rps16         |
| 1.67E-05   | 0.69256611   | 0.274 | 0.149 | 0.220032496 | 17 Dock10        |
| 1.86E-05   | -0.416891951 | 0.169 | 0.383 | 0.245519826 | 17 Lbr           |
| 1.87E-05   | -0.289954371 | 0.952 | 0.955 | 0.247065155 | 17 mt-Co3        |
| 2.57E-05   | 0.379219722  | 0.75  | 0.597 | 0.338977519 | 17 Rpl3          |
| 3.23E-05   | -0.503632214 | 0.298 | 0.512 | 0.426170587 | 17 Cbx3          |
| 3.45E-05   | 0.505606085  | 0.5   | 0.374 | 0.45517402  | 17 Btf3          |
| 3.87E-05   | -0.483396516 | 0.113 | 0.296 | 0.510679218 | 17 Pkm           |
| 4.74E-05   | 0.686506894  | 0.419 | 0.292 | 0.625554815 | 17 Sat1          |
| 5.39E-05   | -0.552814074 | 0.097 | 0.262 | 0.710421958 | 17 Aprt          |
| 5.47E-05   | 0.587699142  | 0.266 | 0.149 | 0.721742956 | 17 Trim30a       |
| 5.73E-05   | 0.562235625  | 0.379 | 0.248 | 0.755476222 | 17 Psmb8         |
| 6.75E-05   | -0.709108675 | 0.121 | 0.282 | 0.889971225 | 17 Slpi          |
| 7.47E-05   | 0.430600582  | 0.46  | 0.313 | 0.985755601 | 17 Ptprc         |
| 8.36E-05   | -0.524715901 | 0.105 | 0.272 | 1           | 17 Gpi1          |
| 9.25E-05   | 0.513999942  | 0.274 | 0.153 | 1           | 17 Arhgap30      |
| 0.00010675 | 0.253070496  | 0.839 | 0.672 | 1           | 17 Gm2000        |

|            |              |       |       |   |              |
|------------|--------------|-------|-------|---|--------------|
| 0.00011831 | 0.399841544  | 0.589 | 0.466 | 1 | 17 Ly6e      |
| 0.00012817 | -0.413004303 | 0.556 | 0.693 | 1 | 17 Hmgb1     |
| 0.00012884 | 0.309671765  | 0.879 | 0.77  | 1 | 17 Rps3a1    |
| 0.00012943 | 0.281072433  | 0.71  | 0.576 | 1 | 17 Rpl15     |
| 0.00014749 | 0.597672835  | 0.258 | 0.147 | 1 | 17 Cd48      |
| 0.00014923 | 0.422988887  | 0.306 | 0.182 | 1 | 17 Mrpl52    |
| 0.00016451 | 0.277312625  | 0.831 | 0.759 | 1 | 17 Rps3      |
| 0.00017493 | -0.426247101 | 0.161 | 0.335 | 1 | 17 Lsm5      |
| 0.0001927  | 0.425476143  | 0.645 | 0.554 | 1 | 17 Calm1     |
| 0.00020501 | 0.259866903  | 0.758 | 0.645 | 1 | 17 Rpl8      |
| 0.00024886 | -0.718696919 | 0.202 | 0.363 | 1 | 17 Ifitm6    |
| 0.0002895  | -0.522200243 | 0.129 | 0.281 | 1 | 17 mt-Nd4l   |
| 0.00029772 | 0.270348345  | 0.637 | 0.525 | 1 | 17 Coro1a    |
| 0.0002994  | 0.299034716  | 0.79  | 0.644 | 1 | 17 Gm10263   |
| 0.00030219 | -0.430786492 | 0.226 | 0.395 | 1 | 17 Gm8186    |
| 0.00034435 | 0.319698748  | 0.565 | 0.432 | 1 | 17 Rpl13-ps3 |
| 0.00035162 | 0.492885202  | 0.46  | 0.366 | 1 | 17 Capza2    |
| 0.00035356 | 0.511374406  | 0.444 | 0.338 | 1 | 17 Ifitm2    |
| 0.00036769 | -0.423123135 | 0.419 | 0.585 | 1 | 17 S100a11   |
| 0.00038072 | -0.379567422 | 0.121 | 0.273 | 1 | 17 Aldoa     |
| 0.00038425 | 0.382138107  | 0.565 | 0.465 | 1 | 17 Rpl10-ps3 |
| 0.0003899  | 0.291703424  | 0.823 | 0.744 | 1 | 17 Rpl9      |
| 0.0004281  | 0.279143314  | 0.653 | 0.53  | 1 | 17 S100a6    |
| 0.00044863 | 0.383207091  | 0.282 | 0.167 | 1 | 17 Pld4      |
| 0.00046326 | -0.302398764 | 0.855 | 0.842 | 1 | 17 Ptma      |
| 0.00047109 | 0.392801935  | 0.589 | 0.502 | 1 | 17 Mbnl1     |
| 0.0004737  | 0.256835817  | 0.823 | 0.715 | 1 | 17 Rpl11     |
| 0.00050483 | 0.344064315  | 0.548 | 0.426 | 1 | 17 Prdx1     |
| 0.00056241 | 0.305062245  | 0.758 | 0.656 | 1 | 17 Rps10     |
| 0.00060677 | 0.545185661  | 0.258 | 0.161 | 1 | 17 Ctsz      |
| 0.0006824  | -0.540943741 | 0.153 | 0.299 | 1 | 17 Cd24a     |

|            |              |       |       |   |                  |
|------------|--------------|-------|-------|---|------------------|
| 0.000702   | 0.420034519  | 0.371 | 0.252 | 1 | 17 Btg1          |
| 0.00082559 | 0.414747309  | 0.29  | 0.18  | 1 | 17 Kctd12        |
| 0.00086902 | -0.429785702 | 0.218 | 0.369 | 1 | 17 Ran           |
| 0.00090531 | -0.440203012 | 0.177 | 0.326 | 1 | 17 Scp2          |
| 0.00095606 | 0.252907378  | 0.742 | 0.741 | 1 | 17 H3f3b         |
| 0.00096592 | -0.4071948   | 0.129 | 0.266 | 1 | 17 Ncf1          |
| 0.00099314 | 0.425876813  | 0.774 | 0.682 | 1 | 17 Plac8         |
| 0.00103166 | -0.349323727 | 0.218 | 0.376 | 1 | 17 Srsf2         |
| 0.00108141 | -0.665388409 | 0.306 | 0.48  | 1 | 17 Retnlg        |
| 0.00110282 | -0.376835715 | 0.371 | 0.523 | 1 | 17 Snrpg         |
| 0.00129204 | -0.30739652  | 0.258 | 0.427 | 1 | 17 Tkt           |
| 0.00131265 | 0.473640335  | 0.258 | 0.163 | 1 | 17 Sh3bgrl       |
| 0.00136541 | 0.355499613  | 0.565 | 0.473 | 1 | 17 Rpl27-ps3     |
| 0.00139407 | -0.3918784   | 0.145 | 0.29  | 1 | 17 Ndufv3        |
| 0.00144999 | 0.460216423  | 0.427 | 0.331 | 1 | 17 Notch2        |
| 0.00148776 | 0.44391964   | 0.492 | 0.402 | 1 | 17 Pfdn5         |
| 0.00154484 | -0.36742507  | 0.121 | 0.259 | 1 | 17 Alyref        |
| 0.00168126 | -0.296180101 | 0.137 | 0.278 | 1 | 17 Lamtor2       |
| 0.00177022 | -0.390152746 | 0.226 | 0.377 | 1 | 17 Tmem256       |
| 0.00177907 | -0.415251313 | 0.226 | 0.37  | 1 | 17 Tuba1b        |
| 0.00185581 | 0.5052446    | 0.347 | 0.247 | 1 | 17 Capzb         |
| 0.00187412 | -0.432724286 | 0.315 | 0.453 | 1 | 17 Atpif1        |
| 0.00190183 | 0.363402029  | 0.524 | 0.425 | 1 | 17 Eef2          |
| 0.00208679 | -0.354561454 | 0.145 | 0.285 | 1 | 17 Tra2b         |
| 0.00218841 | -0.280846103 | 0.411 | 0.571 | 1 | 17 Hnrnpa2b1     |
| 0.00220507 | -0.371582698 | 0.242 | 0.387 | 1 | 17 1810037117Rik |
| 0.00225357 | 0.27173411   | 0.71  | 0.609 | 1 | 17 Gm11808       |
| 0.0025691  | 0.413750388  | 0.387 | 0.313 | 1 | 17 Eif3k         |
| 0.00287116 | -0.351221303 | 0.218 | 0.356 | 1 | 17 Msrb1         |
| 0.0029055  | 0.259314735  | 0.677 | 0.574 | 1 | 17 Rpl10a        |
| 0.00294098 | -0.331481866 | 0.266 | 0.417 | 1 | 17 Gapdh         |

|            |              |       |       |          |             |
|------------|--------------|-------|-------|----------|-------------|
| 0.00297917 | 0.2696864    | 0.532 | 0.417 | 1        | 17 Hsp90ab1 |
| 0.00314335 | -0.304823533 | 0.185 | 0.329 | 1        | 17 Lamtor4  |
| 0.00326396 | -0.334720011 | 0.194 | 0.339 | 1        | 17 Nucks1   |
| 0.00356837 | 0.471153251  | 0.355 | 0.256 | 1        | 17 Gm9844   |
| 0.0036051  | -0.283648597 | 0.185 | 0.323 | 1        | 17 Hnrnpu   |
| 0.00394047 | -0.379925615 | 0.468 | 0.572 | 1        | 17 mt-Nd4   |
| 0.00428916 | 0.403318498  | 0.274 | 0.183 | 1        | 17 Samhd1   |
| 0.00432744 | 0.432071582  | 0.323 | 0.234 | 1        | 17 Zeb2     |
| 0.00433786 | -0.274561187 | 0.194 | 0.328 | 1        | 17 Hsp90aa1 |
| 0.00451915 | 0.481167889  | 0.363 | 0.282 | 1        | 17 Gm10269  |
| 0.00460602 | -0.269497072 | 0.234 | 0.38  | 1        | 17 Eif5a    |
| 0.0055033  | -0.355030358 | 0.169 | 0.286 | 1        | 17 Ywhab    |
| 0.0057311  | 0.41958511   | 0.339 | 0.254 | 1        | 17 Vim      |
| 0.00605619 | -0.344126333 | 0.21  | 0.336 | 1        | 17 Irf2bp2  |
| 0.00613788 | -0.402099021 | 0.161 | 0.277 | 1        | 17 Aldh2    |
| 0.00657531 | 0.404916702  | 0.395 | 0.317 | 1        | 17 Gm10116  |
| 0.00667447 | 0.329402097  | 0.419 | 0.333 | 1        | 17 Pomp     |
| 0.00687825 | -0.276912707 | 0.266 | 0.411 | 1        | 17 Anp32b   |
| 0.00718243 | 0.372940866  | 0.371 | 0.283 | 1        | 17 Eef1g    |
| 0.007693   | -0.366288313 | 0.145 | 0.254 | 1        | 17 Ndufb2   |
| 0.00794534 | -0.347129369 | 0.524 | 0.622 | 1        | 17 mt-Nd1   |
| 0.00801706 | -0.289239846 | 0.137 | 0.253 | 1        | 17 Ndufb3   |
| 0.00874004 | -0.324046462 | 0.145 | 0.255 | 1        | 17 Timm13   |
| 0.00919151 | 0.448462804  | 0.347 | 0.277 | 1        | 17 Atp6v1g1 |
| 0.00922271 | 0.37255222   | 0.411 | 0.348 | 1        | 17 Ndufa6   |
| 2.74E-17   | 0.485465639  | 0.366 | 0.09  | 3.62E-13 | 18 Ly6g     |
| 1.86E-13   | 0.554674515  | 0.828 | 0.423 | 2.45E-09 | 18 Anxa1    |
| 5.76E-13   | 0.476784983  | 0.505 | 0.178 | 7.60E-09 | 18 Ccl6     |
| 1.19E-12   | 0.464794997  | 0.72  | 0.31  | 1.57E-08 | 18 Ptprc    |
| 3.17E-12   | 0.442840482  | 0.892 | 0.536 | 4.18E-08 | 18 Ltf      |
| 5.56E-12   | 0.564037264  | 0.645 | 0.286 | 7.34E-08 | 18 Mgst1    |

**Neutrophil**

|          |             |       |       |             |    |         |
|----------|-------------|-------|-------|-------------|----|---------|
| 6.12E-12 | 0.345011339 | 0.946 | 0.552 | 8.07E-08    | 18 | Lcn2    |
| 3.02E-11 | 0.332497905 | 0.753 | 0.354 | 3.98E-07    | 18 | Ifitm6  |
| 3.59E-11 | 0.281214336 | 0.989 | 0.625 | 4.73E-07    | 18 | Wfdc21  |
| 4.39E-11 | 0.460286606 | 0.914 | 0.527 | 5.79E-07    | 18 | S100a6  |
| 3.49E-10 | 0.428058641 | 0.333 | 0.112 | 4.60E-06    | 18 | Mmp9    |
| 7.43E-10 | 0.356515193 | 0.828 | 0.442 | 9.80E-06    | 18 | Pglyrp1 |
| 9.88E-10 | 0.407780573 | 0.86  | 0.554 | 1.30E-05    | 18 | Ifitm3  |
| 3.33E-09 | 0.441593717 | 0.441 | 0.177 | 4.39E-05    | 18 | Ckap4   |
| 3.43E-09 | 0.384250914 | 0.387 | 0.143 | 4.53E-05    | 18 | Ilgam   |
| 3.53E-09 | 0.471999739 | 0.344 | 0.123 | 4.65E-05    | 18 | Pirb    |
| 5.52E-09 | 0.385649078 | 0.516 | 0.222 | 7.29E-05    | 18 | S100a4  |
| 8.01E-09 | 0.333821994 | 1     | 0.994 | 0.000105689 | 18 | S100a9  |
| 8.73E-09 | 0.335075096 | 0.989 | 0.847 | 0.000115108 | 18 | Ngp     |
| 1.04E-08 | 0.383569136 | 0.269 | 0.087 | 0.000137518 | 18 | Ssh2    |
| 1.08E-08 | 0.355752177 | 0.548 | 0.246 | 0.000142681 | 18 | Tmcc1   |
| 1.39E-08 | 0.309994421 | 0.28  | 0.093 | 0.000182923 | 18 | Rab8a   |
| 1.40E-08 | 0.510414469 | 0.28  | 0.097 | 0.00018457  | 18 | Lrg1    |
| 2.19E-08 | 0.279250624 | 0.484 | 0.206 | 0.000288857 | 18 | Fn1     |
| 2.77E-08 | 0.424497795 | 0.301 | 0.108 | 0.000364799 | 18 | Dok3    |
| 2.85E-08 | 0.269409727 | 1     | 0.904 | 0.000376399 | 18 | Lyz2    |
| 4.67E-08 | 0.347961807 | 0.505 | 0.225 | 0.000615731 | 18 | Cpne3   |
| 4.95E-08 | 0.328073719 | 0.892 | 0.577 | 0.000652481 | 18 | S100a11 |
| 5.67E-08 | 0.347183459 | 0.989 | 0.726 | 0.000747285 | 18 | Cd52    |
| 8.10E-08 | 0.336667876 | 0.914 | 0.661 | 0.001068909 | 18 | Arhgdib |
| 9.06E-08 | 0.404502653 | 0.366 | 0.148 | 0.001195196 | 18 | Rhog    |
| 9.27E-08 | 0.500169658 | 0.516 | 0.254 | 0.001222239 | 18 | Cebpb   |
| 9.65E-08 | 0.30331725  | 0.548 | 0.252 | 0.001273056 | 18 | Anxa2   |
| 9.81E-08 | 0.377825814 | 0.688 | 0.359 | 0.001294452 | 18 | Lst1    |
| 1.45E-07 | 0.375607289 | 0.559 | 0.276 | 0.001910855 | 18 | Rap1b   |
| 1.47E-07 | 0.414082631 | 0.28  | 0.102 | 0.001939583 | 18 | Ms4a6b  |
| 2.31E-07 | 0.909174523 | 0.731 | 0.473 | 0.00305275  | 18 | Retnlg  |

|          |             |       |       |             |    |         |
|----------|-------------|-------|-------|-------------|----|---------|
| 2.80E-07 | 0.382255408 | 0.323 | 0.128 | 0.003688079 | 18 | Syne1   |
| 3.42E-07 | 0.373407644 | 0.505 | 0.241 | 0.004505024 | 18 | Fxyd5   |
| 3.67E-07 | 0.382034026 | 0.559 | 0.275 | 0.0048375   | 18 | Lcp1    |
| 4.24E-07 | 0.543969298 | 0.29  | 0.117 | 0.005587197 | 18 | Mmp8    |
| 4.24E-07 | 0.385392199 | 0.398 | 0.177 | 0.005596429 | 18 | Gda     |
| 4.38E-07 | 0.302752738 | 0.258 | 0.092 | 0.005775435 | 18 | Megf9   |
| 4.89E-07 | 0.35304306  | 0.731 | 0.434 | 0.006454214 | 18 | Lgals3  |
| 5.48E-07 | 0.394097808 | 0.796 | 0.497 | 0.007222424 | 18 | Cybb    |
| 8.32E-07 | 0.30992209  | 0.548 | 0.27  | 0.010977596 | 18 | Aldh2   |
| 1.17E-06 | 0.290420847 | 0.366 | 0.156 | 0.015488614 | 18 | Cd9     |
| 1.78E-06 | 0.322846257 | 0.527 | 0.262 | 0.023506827 | 18 | Clec4a2 |
| 2.07E-06 | 0.30382677  | 0.839 | 0.548 | 0.027244501 | 18 | Chil3   |
| 2.76E-06 | 0.422985905 | 0.28  | 0.114 | 0.036406124 | 18 | Rnf130  |
| 2.80E-06 | 0.304312621 | 0.559 | 0.29  | 0.036969169 | 18 | Sat1    |
| 3.45E-06 | 0.304288671 | 0.29  | 0.12  | 0.045550339 | 18 | Vcl     |
| 3.82E-06 | 0.292873436 | 0.548 | 0.283 | 0.050341388 | 18 | Ndufv3  |
| 3.91E-06 | 0.389931537 | 0.473 | 0.237 | 0.05154109  | 18 | Slfn2   |
| 3.99E-06 | 0.302792833 | 0.387 | 0.177 | 0.052652764 | 18 | Zyx     |
| 4.15E-06 | 0.323315207 | 0.258 | 0.101 | 0.054803084 | 18 | Gpr141  |
| 4.22E-06 | 0.27569131  | 0.258 | 0.1   | 0.055627185 | 18 | Ltb4r1  |
| 5.10E-06 | 0.277458623 | 0.688 | 0.392 | 0.067300239 | 18 | Dstn    |
| 5.58E-06 | 0.270637262 | 0.441 | 0.212 | 0.07361351  | 18 | Srp14   |
| 5.91E-06 | 0.328166007 | 0.28  | 0.116 | 0.07800311  | 18 | Neat1   |
| 7.29E-06 | 0.399095351 | 0.28  | 0.116 | 0.096189768 | 18 | Ap1s2   |
| 7.29E-06 | 0.289962815 | 0.452 | 0.222 | 0.096200206 | 18 | Ptpn6   |
| 8.48E-06 | 0.291509637 | 0.269 | 0.11  | 0.111853335 | 18 | Il17ra  |
| 8.60E-06 | 0.329838241 | 0.333 | 0.15  | 0.113431283 | 18 | Glrx    |
| 8.70E-06 | 0.315076984 | 0.269 | 0.111 | 0.114809006 | 18 | Pygl    |
| 9.58E-06 | 0.271157862 | 0.43  | 0.21  | 0.126416643 | 18 | Cd177   |
| 1.69E-05 | 0.318968595 | 0.419 | 0.211 | 0.223313008 | 18 | C3      |
| 1.71E-05 | 0.276612041 | 0.452 | 0.231 | 0.225326979 | 18 | Arpc4   |

|            |              |       |       |             |    |           |
|------------|--------------|-------|-------|-------------|----|-----------|
| 1.99E-05   | 0.276172126  | 0.366 | 0.175 | 0.262388889 | 18 | Mpc2      |
| 2.16E-05   | 0.336403518  | 0.269 | 0.117 | 0.285003053 | 18 | Soat1     |
| 2.30E-05   | -0.470401539 | 0.882 | 0.859 | 0.303746835 | 18 | mt-Atp6   |
| 2.38E-05   | 0.325690595  | 0.29  | 0.132 | 0.313826325 | 18 | Sephs2    |
| 3.08E-05   | 0.384659768  | 0.591 | 0.35  | 0.406929529 | 18 | Msrb1     |
| 3.54E-05   | 0.293459775  | 0.495 | 0.275 | 0.466803308 | 18 | lqgap1    |
| 7.81E-05   | 0.264883744  | 0.312 | 0.147 | 1           | 18 | Tpd52     |
| 7.84E-05   | 0.326516579  | 0.269 | 0.124 | 1           | 18 | Ep300     |
| 8.66E-05   | -0.357983227 | 1     | 0.955 | 1           | 18 | Rpl41     |
| 0.00010203 | 0.267960828  | 0.409 | 0.214 | 1           | 18 | Lims1     |
| 0.00011641 | 0.280709811  | 0.71  | 0.451 | 1           | 18 | Hp        |
| 0.00012577 | 0.350387256  | 0.452 | 0.253 | 1           | 18 | Flna      |
| 0.00015266 | 0.338201279  | 0.462 | 0.276 | 1           | 18 | Slpi      |
| 0.00018311 | 0.272802811  | 0.258 | 0.121 | 1           | 18 | Atp6v1b2  |
| 0.00021231 | 0.37715548   | 0.29  | 0.147 | 1           | 18 | Lta4h     |
| 0.00022376 | 0.393547127  | 0.355 | 0.194 | 1           | 18 | Eno1      |
| 0.00022408 | 0.29191152   | 0.301 | 0.153 | 1           | 18 | Bnip3l    |
| 0.00022947 | 0.273325644  | 0.355 | 0.183 | 1           | 18 | Rbms1     |
| 0.00028785 | 0.255278846  | 0.398 | 0.208 | 1           | 18 | Mcemp1    |
| 0.00030044 | 0.359300519  | 0.462 | 0.261 | 1           | 18 | Ncf1      |
| 0.00030489 | 0.270891831  | 0.333 | 0.174 | 1           | 18 | Far1      |
| 0.0003947  | 0.254009427  | 0.312 | 0.158 | 1           | 18 | Prkcd     |
| 0.00044185 | 0.276313696  | 0.301 | 0.156 | 1           | 18 | Pak2      |
| 0.0004479  | 0.32363152   | 0.312 | 0.164 | 1           | 18 | Napsa     |
| 0.00065433 | -0.342628586 | 0.968 | 0.88  | 1           | 18 | Rps14     |
| 0.00070339 | 0.267157685  | 0.312 | 0.163 | 1           | 18 | Tecr      |
| 0.00071973 | 0.305262177  | 0.269 | 0.138 | 1           | 18 | Gabarapl2 |
| 0.00091499 | -0.359263568 | 0.882 | 0.806 | 1           | 18 | Rps16     |
| 0.00097123 | -0.38934619  | 0.903 | 0.835 | 1           | 18 | Rps18     |
| 0.00113743 | 0.270495701  | 0.344 | 0.191 | 1           | 18 | R3hdm4    |
| 0.00117492 | -0.378387342 | 0.849 | 0.78  | 1           | 18 | Rpl26     |



|            |              |       |       |           |    |         |
|------------|--------------|-------|-------|-----------|----|---------|
| 0.00120311 | -0.331258099 | 0.968 | 0.896 | 1         | 18 | Rps19   |
| 0.00145586 | 0.25327785   | 0.269 | 0.142 | 1         | 18 | Gpsm3   |
| 0.00155286 | -0.260623885 | 0.989 | 0.954 | 1         | 18 | mt-Co3  |
| 0.00157913 | -0.382578099 | 0.753 | 0.753 | 1         | 18 | Gm10076 |
| 0.00158508 | -0.391721389 | 0.903 | 0.775 | 1         | 18 | Rpl39   |
| 0.00186947 | -0.373758549 | 0.731 | 0.722 | 1         | 18 | Rpl19   |
| 0.00243083 | -0.40462414  | 0.688 | 0.662 | 1         | 18 | Rps20   |
| 0.0033296  | -0.354277285 | 0.914 | 0.807 | 1         | 18 | Rpl13a  |
| 0.00385862 | -0.354414635 | 0.935 | 0.834 | 1         | 18 | Rps8    |
| 0.00453551 | -0.457845361 | 0.72  | 0.685 | 1         | 18 | Rpl14   |
| 0.00475953 | 0.268063121  | 0.28  | 0.164 | 1         | 18 | Ube2l3  |
| 0.00485873 | -0.374792662 | 0.796 | 0.724 | 1         | 18 | Rps4x   |
| 0.00494713 | -0.260112132 | 1     | 0.9   | 1         | 18 | Rps28   |
| 0.00502949 | -0.348231268 | 0.849 | 0.784 | 1         | 18 | Rps5    |
| 0.00542991 | -0.335714377 | 0.978 | 0.856 | 1         | 18 | Rpl35   |
| 0.00617994 | -0.291863598 | 0.871 | 0.759 | 1         | 18 | Rps3    |
| 0.00635908 | -0.383429198 | 0.796 | 0.703 | 1         | 18 | mt-Cytb |
| 0.00729005 | -0.296526913 | 0.785 | 0.762 | 1         | 18 | Rpl17   |
| 0.00763871 | -0.374469892 | 0.72  | 0.69  | 1         | 18 | Hmgbl   |
| 0.00784156 | -0.32398022  | 0.957 | 0.85  | 1         | 18 | Rpl13   |
| 0          | 2.503422127  | 0.753 | 0.012 | 0         | 19 | Gypa    |
| 0          | 2.478705322  | 0.836 | 0.019 | 0         | 19 | Hemgn   |
| 0          | 2.100373061  | 0.589 | 0.003 | 0         | 19 | Slc4a1  |
| 5.41E-276  | 1.354215017  | 0.342 | 0.003 | 7.14E-272 | 19 | Epb42   |
| 4.44E-265  | 1.852842999  | 0.644 | 0.017 | 5.86E-261 | 19 | Ctse    |
| 5.39E-259  | 4.515615041  | 0.973 | 0.05  | 7.11E-255 | 19 | Hbb-bt  |
| 6.08E-245  | 5.015787377  | 1     | 0.058 | 8.02E-241 | 19 | Hba-a2  |
| 3.37E-197  | 1.127048264  | 0.329 | 0.005 | 4.45E-193 | 19 | Sox6    |
| 4.51E-197  | 2.480430106  | 0.959 | 0.064 | 5.95E-193 | 19 | Car2    |
| 4.96E-192  | 5.187250215  | 1     | 0.08  | 6.55E-188 | 19 | Hba-a1  |
| 5.64E-184  | 2.023247209  | 0.726 | 0.036 | 7.44E-180 | 19 | Aqp1    |

Car enzyme HPC

|           |             |       |       |           |             |
|-----------|-------------|-------|-------|-----------|-------------|
| 2.44E-181 | 1.126668941 | 0.315 | 0.005 | 3.22E-177 | 19 Sptb     |
| 6.74E-181 | 2.097882838 | 0.74  | 0.039 | 8.89E-177 | 19 CpoX     |
| 3.82E-175 | 5.011964269 | 1     | 0.089 | 5.05E-171 | 19 Hbb-bs   |
| 1.09E-166 | 1.306444402 | 0.411 | 0.011 | 1.44E-162 | 19 Nxpe2    |
| 4.66E-166 | 1.193121576 | 0.315 | 0.006 | 6.14E-162 | 19 Snca     |
| 1.27E-165 | 1.486517594 | 0.397 | 0.01  | 1.68E-161 | 19 Cldn13   |
| 5.28E-155 | 1.459745024 | 0.397 | 0.011 | 6.96E-151 | 19 Rhag     |
| 2.77E-148 | 1.640231314 | 0.562 | 0.026 | 3.66E-144 | 19 Smim1    |
| 1.09E-139 | 1.251753353 | 0.315 | 0.008 | 1.44E-135 | 19 Rhd      |
| 5.61E-129 | 1.115193773 | 0.274 | 0.006 | 7.39E-125 | 19 Btnl10   |
| 3.99E-128 | 1.367682317 | 0.384 | 0.013 | 5.27E-124 | 19 Hebpl    |
| 4.70E-127 | 2.009492315 | 0.753 | 0.061 | 6.20E-123 | 19 Blvrb    |
| 1.92E-118 | 1.143428011 | 0.26  | 0.006 | 2.54E-114 | 19 Rec114   |
| 7.63E-117 | 1.000677345 | 0.274 | 0.007 | 1.01E-112 | 19 Ank1     |
| 1.96E-111 | 1.192561411 | 0.274 | 0.007 | 2.59E-107 | 19 Spta1    |
| 2.13E-110 | 1.68144783  | 0.466 | 0.025 | 2.81E-106 | 19 Ubac1    |
| 1.81E-103 | 1.462703183 | 0.438 | 0.023 | 2.39E-99  | 19 Ermap    |
| 6.05E-101 | 1.114318914 | 0.288 | 0.009 | 7.99E-97  | 19 Acp5     |
| 7.79E-99  | 1.688005933 | 0.521 | 0.035 | 1.03E-94  | 19 Mgst3    |
| 4.17E-98  | 1.141716786 | 0.301 | 0.011 | 5.51E-94  | 19 Tspan33  |
| 1.28E-97  | 1.249789521 | 0.37  | 0.017 | 1.68E-93  | 19 Abcb10   |
| 1.01E-93  | 1.774378157 | 0.466 | 0.03  | 1.34E-89  | 19 Fn3krp   |
| 3.36E-83  | 1.735236394 | 0.521 | 0.042 | 4.43E-79  | 19 Slc25a37 |
| 2.86E-80  | 1.848414356 | 0.644 | 0.069 | 3.78E-76  | 19 Tfrc     |
| 1.35E-74  | 1.039988204 | 0.274 | 0.012 | 1.78E-70  | 19 lsg20    |
| 2.06E-72  | 1.205968545 | 0.356 | 0.022 | 2.71E-68  | 19 Klf1     |
| 6.21E-71  | 1.530787745 | 0.438 | 0.035 | 8.19E-67  | 19 Hmbs     |
| 2.05E-70  | 1.004714656 | 0.315 | 0.018 | 2.70E-66  | 19 Gstm5    |
| 1.40E-68  | 1.196231944 | 0.301 | 0.016 | 1.85E-64  | 19 Fech     |
| 3.96E-66  | 1.294496706 | 0.479 | 0.043 | 5.23E-62  | 19 Car1     |
| 4.73E-65  | 0.999832873 | 0.274 | 0.014 | 6.24E-61  | 19 Ptdss2   |

|          |              |       |       |          |            |       |
|----------|--------------|-------|-------|----------|------------|-------|
| 2.57E-63 | 1.814481963  | 0.781 | 0.139 | 3.39E-59 | 19 Prdx2   |       |
| 1.47E-60 | 1.723349112  | 0.726 | 0.12  | 1.94E-56 | 19 Glrx5   |       |
| 6.20E-60 | 1.978858418  | 0.959 | 0.289 | 8.18E-56 | 19 Cd24a   |       |
| 7.96E-60 | 1.678380959  | 0.863 | 0.179 | 1.05E-55 | 19 Tmem14c |       |
| 4.62E-59 | 1.333320222  | 0.411 | 0.036 | 6.09E-55 | 19 Nfia    |       |
| 9.53E-59 | 0.986063258  | 0.315 | 0.021 | 1.26E-54 | 19 Zfpm1   |       |
| 3.65E-53 | 1.069737864  | 0.329 | 0.026 | 4.81E-49 | 19 Abcb4   |       |
| 2.77E-49 | 1.092909375  | 0.288 | 0.021 | 3.65E-45 | 19 Tfdp2   |       |
| 9.66E-47 | 1.267018172  | 0.589 | 0.094 | 1.27E-42 | 19 Bola3   |       |
| 1.02E-46 | 1.382539314  | 0.63  | 0.107 | 1.35E-42 | 19 Uhrf1   |       |
| 4.50E-46 | 0.921903072  | 0.26  | 0.019 | 5.94E-42 | 19 Gata1   |       |
| 4.23E-45 | 1.503296722  | 0.973 | 0.361 | 5.58E-41 | 19 Dek     |       |
| 1.83E-44 | 1.105444728  | 0.397 | 0.044 | 2.41E-40 | 19 Clcn3   |       |
| 5.23E-43 | 1.401514766  | 0.438 | 0.058 | 6.90E-39 | 19 Odc1    |       |
| 1.54E-42 | 0.968321348  | 0.301 | 0.027 | 2.03E-38 | 19 Alad    |       |
| 6.38E-42 | -1.885970658 | 0.932 | 0.997 | 8.42E-38 | 19 Tmsb4x  |       |
| 1.31E-40 | 1.224747235  | 0.384 | 0.046 | 1.73E-36 | 19 Minpp1  |       |
| 5.68E-40 | 1.31454953   | 0.479 | 0.074 | 7.49E-36 | 19 Pabpc4  |       |
| 3.36E-39 | 0.88499824   | 0.274 | 0.024 | 4.43E-35 | 19 Urod    |       |
| 3.74E-39 | 1.442632333  | 0.959 | 0.445 | 4.93E-35 | 19 Atpif1  |       |
| 1.76E-36 | 0.948377719  | 0.342 | 0.04  | 2.33E-32 | 19 Gclc    |       |
| 6.21E-36 | 1.025116604  | 0.356 | 0.044 | 8.19E-32 | 19 Josd2   |       |
| 9.14E-36 | 1.427714472  | 0.781 | 0.23  | 1.21E-31 | 19 Metap2  |       |
| 1.22E-35 | 1.264891895  | 0.986 | 0.639 | 1.61E-31 | 19 Fth1    |       |
| 7.15E-35 | 1.459276142  | 0.712 | 0.186 | 9.44E-31 | 19 Rrm2    |       |
| 7.57E-34 | 1.009582425  | 0.26  | 0.026 | 9.99E-30 | 19 Stard10 |       |
| 1.09E-33 | 0.92221663   | 0.26  | 0.026 | 1.44E-29 | 19 Slc16a1 |       |
| 2.70E-33 | 0.942155924  | 0.288 | 0.031 | 3.56E-29 | 19 Hagh    |       |
| 6.72E-33 | 0.969253005  | 0.384 | 0.053 | 8.87E-29 | 19         | 2-Mar |
| 7.83E-32 | 1.142791796  | 0.342 | 0.046 | 1.03E-27 | 19 Slc43a3 |       |
| 1.41E-31 | 1.1751458    | 0.438 | 0.075 | 1.86E-27 | 19 Hmgb3   |       |

|          |              |       |       |          |              |
|----------|--------------|-------|-------|----------|--------------|
| 2.24E-31 | 1.206083625  | 0.575 | 0.122 | 2.96E-27 | 19 Picalm    |
| 5.05E-31 | 1.087595419  | 0.411 | 0.066 | 6.66E-27 | 19 Acp1      |
| 8.75E-30 | 1.163056925  | 0.658 | 0.171 | 1.15E-25 | 19 Slbp      |
| 2.17E-29 | 1.090697533  | 0.493 | 0.096 | 2.86E-25 | 19 Tnfaip2   |
| 3.06E-28 | 1.138576963  | 0.63  | 0.158 | 4.04E-24 | 19 Lig1      |
| 2.90E-27 | 0.737801893  | 1     | 0.955 | 3.82E-23 | 19 Rpl41     |
| 3.85E-27 | 0.856505737  | 0.288 | 0.037 | 5.08E-23 | 19 Carhsp1   |
| 7.76E-27 | 1.105673881  | 0.342 | 0.053 | 1.02E-22 | 19 Wdhd1     |
| 8.31E-27 | 1.161479037  | 0.644 | 0.178 | 1.10E-22 | 19 Bsg       |
| 1.41E-25 | 0.829968073  | 0.288 | 0.039 | 1.85E-21 | 19 Yod1      |
| 1.68E-25 | 0.949346586  | 0.356 | 0.059 | 2.21E-21 | 19 Ncapg2    |
| 2.09E-25 | 1.029103005  | 0.384 | 0.069 | 2.76E-21 | 19 Fam117a   |
| 3.91E-25 | 1.032237775  | 0.521 | 0.122 | 5.16E-21 | 19 Dck       |
| 6.96E-25 | 1.026614125  | 0.849 | 0.312 | 9.19E-21 | 19 Top2a     |
| 8.22E-25 | 0.928540578  | 0.288 | 0.041 | 1.08E-20 | 19 Clic4     |
| 2.74E-24 | 1.108519127  | 0.438 | 0.092 | 3.61E-20 | 19 Hist1h1e  |
| 3.87E-24 | 0.985556657  | 0.37  | 0.067 | 5.10E-20 | 19 Prdx3     |
| 9.52E-24 | 0.865375719  | 0.397 | 0.075 | 1.26E-19 | 19 Svbp      |
| 2.62E-23 | 0.968848673  | 0.425 | 0.088 | 3.45E-19 | 19 Ccne2     |
| 8.25E-23 | 0.930750005  | 0.329 | 0.057 | 1.09E-18 | 19 Prkar2b   |
| 1.20E-22 | 0.973970046  | 0.685 | 0.214 | 1.59E-18 | 19 Ccnd3     |
| 1.58E-22 | 0.973584863  | 0.342 | 0.061 | 2.09E-18 | 19 Rad23a    |
| 1.91E-22 | -2.956661764 | 0.274 | 0.745 | 2.51E-18 | 19 Tmsb10    |
| 3.08E-22 | 0.765033893  | 0.986 | 0.751 | 4.06E-18 | 19 Gm10076   |
| 4.30E-22 | -2.002846205 | 0.781 | 0.907 | 5.67E-18 | 19 Lyz2      |
| 1.93E-21 | 0.811238906  | 0.315 | 0.054 | 2.55E-17 | 19 Myef2     |
| 3.47E-21 | 1.082076437  | 0.644 | 0.212 | 4.57E-17 | 19 Mki67     |
| 6.91E-21 | 0.794249544  | 0.301 | 0.051 | 9.11E-17 | 19 Dtl       |
| 9.12E-21 | -1.877541678 | 0.233 | 0.736 | 1.20E-16 | 19 Cd52      |
| 1.32E-20 | 1.107976715  | 0.808 | 0.38  | 1.75E-16 | 19 Hist1h2ap |
| 1.65E-20 | 1.107852004  | 0.575 | 0.178 | 2.17E-16 | 19 Pcna      |

|          |              |       |       |          |              |
|----------|--------------|-------|-------|----------|--------------|
| 2.01E-20 | 0.838351491  | 0.26  | 0.04  | 2.65E-16 | 19 Scoc      |
| 5.80E-20 | 0.935171947  | 0.425 | 0.101 | 7.65E-16 | 19 Mcm7      |
| 6.15E-20 | 0.845847166  | 0.945 | 0.55  | 8.12E-16 | 19 Rps2      |
| 1.07E-19 | 0.989344244  | 0.589 | 0.188 | 1.41E-15 | 19 Dut       |
| 1.33E-19 | 0.939955257  | 0.63  | 0.21  | 1.75E-15 | 19 Pdap1     |
| 1.93E-19 | 0.766915422  | 0.288 | 0.05  | 2.55E-15 | 19 Slc25a51  |
| 3.12E-19 | 0.922815548  | 0.384 | 0.086 | 4.12E-15 | 19 Prc1      |
| 4.27E-19 | -1.82693931  | 0.192 | 0.69  | 5.64E-15 | 19 Cyba      |
| 5.72E-19 | -1.447085218 | 0.479 | 0.819 | 7.55E-15 | 19 Tyrobp    |
| 1.14E-18 | 0.795496263  | 0.397 | 0.09  | 1.50E-14 | 19 Herc1     |
| 1.25E-18 | 0.825566367  | 0.315 | 0.061 | 1.65E-14 | 19 Ssbp3     |
| 1.74E-18 | 0.847710147  | 0.342 | 0.073 | 2.30E-14 | 19 Gclm      |
| 2.30E-18 | 1.134217893  | 0.466 | 0.128 | 3.03E-14 | 19 Hist1h2ae |
| 2.48E-18 | 0.954461298  | 0.603 | 0.199 | 3.27E-14 | 19 Supt16    |
| 3.89E-18 | 0.933958766  | 0.822 | 0.403 | 5.13E-14 | 19 Anp32b    |
| 5.80E-18 | -1.554990996 | 0.247 | 0.698 | 7.66E-14 | 19 Sh3bgrl3  |
| 6.38E-18 | 0.919340031  | 0.644 | 0.22  | 8.41E-14 | 19 Rpgrlp1   |
| 8.60E-18 | 0.810869277  | 0.301 | 0.058 | 1.13E-13 | 19 Fam132a   |
| 1.07E-17 | 0.739099642  | 0.288 | 0.053 | 1.41E-13 | 19 Grina     |
| 1.51E-17 | 0.746588733  | 0.384 | 0.087 | 2.00E-13 | 19 Nudt4     |
| 1.57E-17 | -1.590772647 | 0.288 | 0.719 | 2.07E-13 | 19 Fcer1g    |
| 2.87E-17 | 1.11269561   | 0.548 | 0.181 | 3.79E-13 | 19 Lockd     |
| 3.07E-17 | 0.728556199  | 0.973 | 0.72  | 4.05E-13 | 19 Rplp1     |
| 3.39E-17 | 0.688622397  | 0.959 | 0.721 | 4.47E-13 | 19 Rps26     |
| 6.03E-17 | 0.90779958   | 0.411 | 0.105 | 7.95E-13 | 19 Gps2      |
| 1.25E-16 | 0.682675789  | 0.356 | 0.08  | 1.65E-12 | 19 Ago2      |
| 3.64E-16 | 0.865277506  | 0.315 | 0.069 | 4.80E-12 | 19 Eid1      |
| 4.05E-16 | 0.935977836  | 0.521 | 0.161 | 5.34E-12 | 19 Hdgf      |
| 4.27E-16 | 0.747021859  | 0.959 | 0.708 | 5.64E-12 | 19 Rplp0     |
| 6.70E-16 | -1.430254673 | 0.274 | 0.691 | 8.84E-12 | 19 Actg1     |
| 8.01E-16 | 0.837009867  | 0.384 | 0.099 | 1.06E-11 | 19 Atad2     |

|          |              |       |       |          |              |
|----------|--------------|-------|-------|----------|--------------|
| 8.53E-16 | 0.867592038  | 0.877 | 0.504 | 1.13E-11 | 19 Cbx3      |
| 1.66E-15 | 0.745845966  | 0.356 | 0.087 | 2.19E-11 | 19 Mrps36    |
| 1.98E-15 | 0.806437012  | 0.26  | 0.051 | 2.61E-11 | 19 Ap1b1     |
| 2.13E-15 | 0.793683809  | 0.74  | 0.322 | 2.81E-11 | 19 Cks2      |
| 2.39E-15 | 0.74202607   | 0.89  | 0.47  | 3.15E-11 | 19 Rps26-ps1 |
| 6.34E-15 | 0.815523885  | 0.795 | 0.381 | 8.36E-11 | 19 Eif2s2    |
| 1.66E-14 | -1.757848437 | 0.151 | 0.587 | 2.19E-10 | 19 S100a11   |
| 2.28E-14 | -1.717802868 | 0.219 | 0.619 | 3.00E-10 | 19 Ly6c2     |
| 2.68E-14 | 0.896781419  | 0.26  | 0.055 | 3.54E-10 | 19 Mcm2      |
| 4.23E-14 | 1.010875734  | 0.438 | 0.138 | 5.58E-10 | 19 Hist1h1b  |
| 5.43E-14 | 0.556310028  | 0.973 | 0.834 | 7.17E-10 | 19 Rps8      |
| 5.86E-14 | 0.450999394  | 0.986 | 0.954 | 7.73E-10 | 19 mt-Co3    |
| 7.49E-14 | -1.339092759 | 0.301 | 0.669 | 9.89E-10 | 19 Arhgdib   |
| 1.03E-13 | 0.684433681  | 0.37  | 0.099 | 1.36E-09 | 19 Klf3      |
| 1.81E-13 | 0.805340956  | 0.507 | 0.179 | 2.39E-09 | 19 Tubb4b    |
| 2.12E-13 | 0.830453798  | 0.507 | 0.176 | 2.79E-09 | 19 Dnmt1     |
| 2.17E-13 | 0.619243545  | 0.411 | 0.117 | 2.86E-09 | 19 Zbtb7a    |
| 2.27E-13 | 0.748082483  | 0.795 | 0.436 | 3.00E-09 | 19 Gm10073   |
| 2.38E-13 | 0.724753383  | 0.274 | 0.062 | 3.13E-09 | 19 Mzt1      |
| 2.77E-13 | 0.773425042  | 0.822 | 0.465 | 3.65E-09 | 19 Gm8730    |
| 5.52E-13 | 0.841299085  | 0.534 | 0.203 | 7.28E-09 | 19 Birc5     |
| 7.36E-13 | -1.593075949 | 0.11  | 0.532 | 9.71E-09 | 19 Coro1a    |
| 7.36E-13 | 0.758151968  | 0.37  | 0.106 | 9.71E-09 | 19 Fundc2    |
| 8.25E-13 | -1.484717854 | 0.425 | 0.687 | 1.09E-08 | 19 Plac8     |
| 1.01E-12 | 0.636484732  | 0.918 | 0.656 | 1.33E-08 | 19 Rps12     |
| 1.28E-12 | 1.006099409  | 0.452 | 0.158 | 1.68E-08 | 19 Nusap1    |
| 1.53E-12 | 0.801882333  | 0.562 | 0.225 | 2.01E-08 | 19 Smc2      |
| 1.97E-12 | 0.624969901  | 0.342 | 0.093 | 2.60E-08 | 19 Mcm3      |
| 2.20E-12 | 0.862761718  | 0.37  | 0.111 | 2.90E-08 | 19 Khgrp     |
| 2.22E-12 | 0.742494544  | 0.795 | 0.453 | 2.93E-08 | 19 Rps12-ps3 |
| 3.47E-12 | 0.485553042  | 1     | 0.856 | 4.58E-08 | 19 Rpl35     |

|          |              |       |       |          |             |
|----------|--------------|-------|-------|----------|-------------|
| 4.43E-12 | -1.503906406 | 0.288 | 0.636 | 5.84E-08 | 19 Cst3     |
| 5.73E-12 | -0.755066623 | 0.74  | 0.837 | 7.55E-08 | 19 Pfn1     |
| 6.12E-12 | 0.673941843  | 0.479 | 0.169 | 8.07E-08 | 19 Srrm1    |
| 6.29E-12 | 0.666820935  | 0.274 | 0.067 | 8.30E-08 | 19 Zcchc6   |
| 6.99E-12 | -1.78040186  | 0.123 | 0.506 | 9.22E-08 | 19 Cybb     |
| 9.12E-12 | 0.630148496  | 0.315 | 0.083 | 1.20E-07 | 19 Ehbp1l1  |
| 1.19E-11 | 0.61146017   | 0.288 | 0.073 | 1.56E-07 | 19 Asxl2    |
| 1.40E-11 | 0.727180238  | 0.384 | 0.123 | 1.84E-07 | 19 Cbx5     |
| 1.93E-11 | 0.677668245  | 0.37  | 0.114 | 2.55E-07 | 19 Ybx3     |
| 3.59E-11 | 0.563114542  | 0.315 | 0.087 | 4.73E-07 | 19 Pkig     |
| 4.43E-11 | -1.002540998 | 1     | 0.999 | 5.84E-07 | 19 Actb     |
| 4.54E-11 | -0.999103132 | 0.507 | 0.711 | 5.98E-07 | 19 Myl6     |
| 4.82E-11 | 0.730452809  | 0.315 | 0.091 | 6.36E-07 | 19 Tmem245  |
| 5.32E-11 | 0.641768836  | 0.329 | 0.095 | 7.02E-07 | 19 Mcm6     |
| 6.19E-11 | -1.57431309  | 0.068 | 0.449 | 8.16E-07 | 19 Gmfg     |
| 8.04E-11 | 0.775338996  | 0.329 | 0.098 | 1.06E-06 | 19 Cyb5a    |
| 8.06E-11 | 0.718763069  | 0.26  | 0.067 | 1.06E-06 | 19 Hist1h4i |
| 8.13E-11 | 0.608729446  | 0.37  | 0.115 | 1.07E-06 | 19 Ap2a2    |
| 8.40E-11 | -0.835166371 | 0.63  | 0.794 | 1.11E-06 | 19 Ppia     |
| 8.42E-11 | 0.735594028  | 0.384 | 0.132 | 1.11E-06 | 19 Ccdc34   |
| 9.07E-11 | 0.711493905  | 0.397 | 0.132 | 1.20E-06 | 19 Mier1    |
| 1.28E-10 | 0.607500909  | 0.37  | 0.118 | 1.69E-06 | 19 Gtf2a2   |
| 1.36E-10 | 0.663407515  | 0.644 | 0.307 | 1.80E-06 | 19 Arf5     |
| 1.54E-10 | 0.707966487  | 0.274 | 0.074 | 2.03E-06 | 19 Ube2e3   |
| 1.57E-10 | 0.575740545  | 0.89  | 0.645 | 2.07E-06 | 19 Rpl8     |
| 1.70E-10 | 0.529809978  | 0.89  | 0.516 | 2.24E-06 | 19 Snrpg    |
| 1.75E-10 | 0.464593908  | 1     | 0.849 | 2.30E-06 | 19 Rpl13    |
| 1.89E-10 | 0.742920838  | 0.37  | 0.121 | 2.50E-06 | 19 Celf1    |
| 2.30E-10 | -1.18356643  | 0.411 | 0.648 | 3.04E-06 | 19 Prdx5    |
| 2.40E-10 | 0.537263238  | 0.849 | 0.48  | 3.17E-06 | 19 Rpl12    |
| 2.52E-10 | -1.378007869 | 0.137 | 0.494 | 3.32E-06 | 19 Arpc2    |

|          |              |       |       |          |                  |
|----------|--------------|-------|-------|----------|------------------|
| 3.07E-10 | 0.459836579  | 0.959 | 0.774 | 4.05E-06 | 19 Rpl39         |
| 3.08E-10 | 0.579767245  | 0.877 | 0.605 | 4.06E-06 | 19 Rps21         |
| 3.18E-10 | 0.49499388   | 0.959 | 0.683 | 4.19E-06 | 19 Rpl14         |
| 3.33E-10 | -1.001427513 | 0.315 | 0.653 | 4.39E-06 | 19 Itm2b         |
| 3.37E-10 | 0.576661498  | 0.329 | 0.099 | 4.44E-06 | 19 Galnt1        |
| 3.72E-10 | 0.658740548  | 0.466 | 0.174 | 4.91E-06 | 19 Srsf10        |
| 3.83E-10 | 0.445938288  | 1     | 0.834 | 5.05E-06 | 19 Rps18         |
| 3.89E-10 | 0.422666642  | 0.986 | 0.818 | 5.13E-06 | 19 H2afz         |
| 3.96E-10 | 0.503497366  | 0.945 | 0.742 | 5.22E-06 | 19 Gpx1          |
| 4.03E-10 | -1.763353666 | 0.219 | 0.536 | 5.32E-06 | 19 S100a6        |
| 4.55E-10 | 0.700810539  | 0.342 | 0.109 | 6.00E-06 | 19 Zc3hav1       |
| 4.63E-10 | 0.70112577   | 0.356 | 0.119 | 6.11E-06 | 19 Wbp5          |
| 4.74E-10 | 0.984078257  | 0.342 | 0.117 | 6.26E-06 | 19 Wapl          |
| 5.74E-10 | -1.453388264 | 0.096 | 0.448 | 7.57E-06 | 19 Arpc1b        |
| 5.84E-10 | -1.43344002  | 0.123 | 0.482 | 7.71E-06 | 19 F630028O10Rik |
| 6.99E-10 | 0.4684797    | 0.945 | 0.719 | 9.22E-06 | 19 Rpl6          |
| 1.17E-09 | 0.565238063  | 0.411 | 0.146 | 1.54E-05 | 19 Mrpl14        |
| 1.23E-09 | 0.563901458  | 0.452 | 0.17  | 1.62E-05 | 19 Cenpa         |
| 1.25E-09 | 0.624787931  | 0.342 | 0.112 | 1.65E-05 | 19 1700020I14Rik |
| 1.45E-09 | 0.623807279  | 0.26  | 0.073 | 1.91E-05 | 19 Ppp2r4        |
| 1.45E-09 | 0.553271418  | 0.397 | 0.139 | 1.92E-05 | 19 Nol7          |
| 1.48E-09 | -1.570915072 | 0.055 | 0.4   | 1.96E-05 | 19 Dstn          |
| 1.50E-09 | -2.090352144 | 1     | 0.999 | 1.98E-05 | 19 S100a8        |
| 1.76E-09 | 0.508075612  | 0.863 | 0.493 | 2.32E-05 | 19 Tubb5         |
| 1.88E-09 | 0.599292922  | 0.301 | 0.092 | 2.48E-05 | 19 Ccna2         |
| 1.92E-09 | 0.673466564  | 0.384 | 0.137 | 2.53E-05 | 19 Bcas2         |
| 1.92E-09 | -1.395434314 | 0.11  | 0.458 | 2.53E-05 | 19 Hp            |
| 1.98E-09 | 0.467071523  | 0.918 | 0.739 | 2.61E-05 | 19 Rpl23         |
| 2.64E-09 | -1.617854754 | 0.11  | 0.442 | 3.49E-05 | 19 Lgals3        |
| 2.68E-09 | -2.080142974 | 0.411 | 0.633 | 3.54E-05 | 19 Wfdc21        |
| 2.78E-09 | 0.640495746  | 0.521 | 0.226 | 3.66E-05 | 19 Csnk1a1       |



|          |              |       |       |             |            |
|----------|--------------|-------|-------|-------------|------------|
| 2.98E-09 | -1.654580879 | 0.164 | 0.481 | 3.94E-05    | 19 Lgals1  |
| 2.99E-09 | 0.583479742  | 0.315 | 0.1   | 3.95E-05    | 19 Suz12   |
| 3.05E-09 | 0.648179455  | 0.384 | 0.141 | 4.03E-05    | 19 Lmo2    |
| 3.13E-09 | 0.52460076   | 0.904 | 0.634 | 4.12E-05    | 19 Sec61g  |
| 3.50E-09 | 0.552342495  | 0.562 | 0.253 | 4.62E-05    | 19 Alyref  |
| 3.65E-09 | 0.598910533  | 0.795 | 0.511 | 4.81E-05    | 19 Cox6a1  |
| 3.66E-09 | 0.638764333  | 0.301 | 0.094 | 4.83E-05    | 19 E2f8    |
| 4.31E-09 | -0.735374889 | 0.671 | 0.782 | 5.69E-05    | 19 Shfm1   |
| 5.37E-09 | -1.858094181 | 0.137 | 0.451 | 7.08E-05    | 19 Pglyrp1 |
| 5.44E-09 | 0.594344936  | 0.726 | 0.393 | 7.18E-05    | 19 mt-Atp8 |
| 5.78E-09 | 0.639065242  | 0.274 | 0.084 | 7.62E-05    | 19 Incenp  |
| 6.06E-09 | 0.652111571  | 0.658 | 0.356 | 8.00E-05    | 19 Gpx4    |
| 6.19E-09 | 0.532306311  | 0.89  | 0.681 | 8.17E-05    | 19 Rpsa    |
| 7.84E-09 | 0.531473982  | 0.37  | 0.13  | 0.000103395 | 19 Alkbh5  |
| 7.89E-09 | 0.60265519   | 0.329 | 0.112 | 0.000104037 | 19 Smc1a   |
| 8.59E-09 | 0.521297023  | 0.753 | 0.388 | 0.000113318 | 19 Gm8186  |
| 8.92E-09 | 0.587127372  | 0.493 | 0.205 | 0.000117645 | 19 Hnrnpd  |
| 9.41E-09 | 0.469129398  | 0.863 | 0.587 | 0.000124169 | 19 Wdr89   |
| 1.03E-08 | -1.690405748 | 0.438 | 0.639 | 0.00013589  | 19 Crip1   |
| 1.18E-08 | -1.688803299 | 0.315 | 0.555 | 0.000155046 | 19 Chil3   |
| 1.26E-08 | 0.785813455  | 0.329 | 0.116 | 0.000166775 | 19 Tipin   |
| 1.64E-08 | 0.412981301  | 0.932 | 0.694 | 0.000216179 | 19 Oaz1    |
| 1.68E-08 | 0.607900473  | 0.63  | 0.311 | 0.000221989 | 19 Atp5g1  |
| 1.81E-08 | 0.574704564  | 0.274 | 0.085 | 0.000238795 | 19 Psm11   |
| 1.89E-08 | 0.683874782  | 0.301 | 0.102 | 0.000249177 | 19 Ppm1g   |
| 1.90E-08 | -1.50621726  | 0.274 | 0.562 | 0.000250835 | 19 Ifitm3  |
| 2.00E-08 | 0.643167879  | 0.397 | 0.157 | 0.000263177 | 19 Rpa3    |
| 2.21E-08 | 0.458125949  | 0.918 | 0.688 | 0.00029186  | 19 Hmg1b1  |
| 2.27E-08 | 0.378815627  | 0.959 | 0.807 | 0.000299173 | 19 Rpl13a  |
| 3.27E-08 | 0.645936391  | 0.26  | 0.081 | 0.000431967 | 19 Pkn2    |
| 3.56E-08 | 0.655667817  | 0.425 | 0.175 | 0.00047018  | 19 Smarca5 |

|          |              |       |       |             |             |
|----------|--------------|-------|-------|-------------|-------------|
| 3.58E-08 | 0.504821374  | 0.452 | 0.185 | 0.000471961 | 19 Eif3j1   |
| 3.67E-08 | 0.374252134  | 0.945 | 0.858 | 0.000484265 | 19 mt-Atp6  |
| 3.76E-08 | 0.681252599  | 0.288 | 0.098 | 0.000495519 | 19 Wdr76    |
| 5.33E-08 | 0.409167142  | 0.918 | 0.641 | 0.000703153 | 19 Rpl36a   |
| 6.17E-08 | 0.511034173  | 0.288 | 0.096 | 0.000814407 | 19 Smap1    |
| 6.65E-08 | 0.619440478  | 0.452 | 0.202 | 0.000877024 | 19 Ewsr1    |
| 8.63E-08 | 0.5307524    | 0.74  | 0.429 | 0.00113777  | 19 Cox17    |
| 9.45E-08 | 0.472764468  | 0.836 | 0.522 | 0.001246288 | 19 Rpl22    |
| 9.69E-08 | 0.556289357  | 0.589 | 0.298 | 0.001278826 | 19 Sfpq     |
| 1.17E-07 | 0.562849243  | 0.274 | 0.091 | 0.001536942 | 19 Tnrc6a   |
| 1.20E-07 | -2.146179029 | 1     | 0.994 | 0.001588291 | 19 S100a9   |
| 1.23E-07 | 0.462656498  | 0.781 | 0.444 | 0.001625856 | 19 Rpl9-ps6 |
| 1.24E-07 | 0.558734582  | 0.685 | 0.424 | 0.001641258 | 19 Serbp1   |
| 1.26E-07 | 0.380257726  | 0.918 | 0.779 | 0.001668352 | 19 Rpl26    |
| 1.32E-07 | 0.325838964  | 0.986 | 0.777 | 0.001747403 | 19 Hmgb2    |
| 1.84E-07 | 0.583393705  | 0.26  | 0.087 | 0.002425823 | 19 Plk4     |
| 1.91E-07 | 0.534376505  | 0.671 | 0.376 | 0.002521334 | 19 Lbr      |
| 1.96E-07 | -1.279293387 | 0.315 | 0.546 | 0.00258817  | 19 Psap     |
| 2.06E-07 | 0.463171664  | 0.26  | 0.084 | 0.002722675 | 19 Itgb1    |
| 2.07E-07 | -1.937718917 | 0.342 | 0.544 | 0.002728298 | 19 Ltf      |
| 2.08E-07 | 0.685953785  | 0.301 | 0.11  | 0.002748036 | 19 Cenpf    |
| 2.35E-07 | 0.344884355  | 0.932 | 0.806 | 0.003098839 | 19 Rps16    |
| 2.60E-07 | -1.917444373 | 0.356 | 0.56  | 0.003427738 | 19 Lcn2     |
| 2.64E-07 | 0.443494062  | 0.26  | 0.085 | 0.003486706 | 19 Aplp2    |
| 2.95E-07 | -1.001769382 | 0.342 | 0.58  | 0.003885048 | 19 H2-D1    |
| 3.13E-07 | 0.33495131   | 0.918 | 0.747 | 0.004134887 | 19 Rps15a   |
| 3.19E-07 | 0.680096323  | 0.616 | 0.37  | 0.004205761 | 19 Srsf2    |
| 3.40E-07 | 0.516442775  | 0.452 | 0.197 | 0.004481468 | 19 Dnajc8   |
| 3.51E-07 | 0.491759707  | 0.836 | 0.567 | 0.004635772 | 19 mt-Nd4   |
| 5.68E-07 | -1.224162403 | 0.233 | 0.471 | 0.007495681 | 19 Ly6e     |
| 5.96E-07 | -1.290459658 | 0.027 | 0.297 | 0.007855872 | 19 Laptm5   |

|          |              |       |       |             |                  |
|----------|--------------|-------|-------|-------------|------------------|
| 6.35E-07 | 0.619889008  | 0.26  | 0.092 | 0.008375379 | 19 Ccnb2         |
| 7.04E-07 | 0.357729593  | 0.932 | 0.776 | 0.009286368 | 19 Rplp2         |
| 7.20E-07 | 0.52273627   | 0.603 | 0.33  | 0.009497859 | 19 2810417H13Rik |
| 8.33E-07 | 0.55590412   | 0.849 | 0.581 | 0.010987668 | 19 Eif1          |
| 9.28E-07 | 0.583348962  | 0.288 | 0.105 | 0.012234874 | 19 Golim4        |
| 9.37E-07 | 0.361820839  | 0.932 | 0.743 | 0.012359643 | 19 Rpl9          |
| 9.46E-07 | -1.141614648 | 0.096 | 0.369 | 0.012478451 | 19 Emp3          |
| 9.54E-07 | 0.392513326  | 0.877 | 0.597 | 0.012579684 | 19 Rpl3          |
| 1.02E-06 | -1.082215632 | 0.205 | 0.454 | 0.013412302 | 19 Alox5ap       |
| 1.15E-06 | 0.403064455  | 0.904 | 0.723 | 0.015231381 | 19 Rps4x         |
| 1.16E-06 | 0.536927957  | 0.288 | 0.107 | 0.015303301 | 19 Psip1         |
| 1.23E-06 | 0.50823876   | 0.301 | 0.115 | 0.016191793 | 19 Fam120a       |
| 1.25E-06 | 0.381497987  | 0.342 | 0.134 | 0.016541968 | 19 Ctbp1         |
| 1.49E-06 | 0.477805099  | 0.534 | 0.265 | 0.019623512 | 19 Ndufb9        |
| 1.57E-06 | 0.541557349  | 0.274 | 0.101 | 0.020733928 | 19 2700029M09Rik |
| 1.63E-06 | 0.58903417   | 0.521 | 0.278 | 0.02153205  | 19 Hnrnpab       |
| 1.65E-06 | 0.519211293  | 0.534 | 0.281 | 0.021730459 | 19 Luc7l2        |
| 1.71E-06 | -1.445871215 | 0.014 | 0.26  | 0.022573344 | 19 Gm9844        |
| 1.81E-06 | 0.536669545  | 0.301 | 0.119 | 0.023923481 | 19 Cenpw         |
| 1.88E-06 | -1.205456555 | 0.123 | 0.368 | 0.024790125 | 19 Gsr           |
| 1.89E-06 | -1.031382595 | 0.137 | 0.401 | 0.024952276 | 19 Actr3         |
| 2.07E-06 | -1.27555859  | 0.192 | 0.432 | 0.027361389 | 19 Anxa1         |
| 2.13E-06 | -1.2642343   | 0.014 | 0.259 | 0.02803116  | 19 Vim           |
| 2.21E-06 | -0.697912029 | 0.603 | 0.707 | 0.029192322 | 19 Sub1          |
| 2.28E-06 | -2.007177569 | 0.973 | 0.931 | 0.030011648 | 19 Camp          |
| 2.39E-06 | 0.389044065  | 0.849 | 0.655 | 0.031504951 | 19 Rps10         |
| 2.42E-06 | 0.372890665  | 0.89  | 0.673 | 0.031946955 | 19 Gm2000        |
| 2.47E-06 | 0.511603179  | 0.534 | 0.282 | 0.032622323 | 19 Tmpo          |
| 2.52E-06 | 0.495878209  | 0.808 | 0.618 | 0.0332679   | 19 mt-Nd1        |
| 2.68E-06 | -2.13839434  | 0.849 | 0.849 | 0.035320598 | 19 Ngp           |
| 2.71E-06 | -1.555197823 | 0.123 | 0.363 | 0.035762262 | 19 Ifitm6        |

|          |              |       |       |             |            |
|----------|--------------|-------|-------|-------------|------------|
| 3.12E-06 | 0.452122141  | 0.384 | 0.166 | 0.041168089 | 19 Srsf1   |
| 3.23E-06 | 0.467102769  | 0.74  | 0.479 | 0.042646713 | 19 Uqcrh   |
| 3.27E-06 | -1.375004926 | 0.027 | 0.267 | 0.043141571 | 19 S100a10 |
| 3.72E-06 | -1.198063683 | 0.123 | 0.367 | 0.049086204 | 19 Lst1    |
| 3.85E-06 | 0.38106663   | 0.493 | 0.236 | 0.050795281 | 19 Cks1b   |
| 3.89E-06 | -1.128606075 | 0.123 | 0.366 | 0.051343057 | 19 Serp1   |
| 4.38E-06 | 0.609783535  | 0.301 | 0.125 | 0.057818147 | 19 Dnajc9  |
| 4.47E-06 | 0.32540203   | 0.918 | 0.707 | 0.05890266  | 19 Rpl28   |
| 4.57E-06 | -1.200032365 | 0.082 | 0.325 | 0.060286978 | 19 Npc2    |
| 4.69E-06 | 0.348841023  | 0.918 | 0.743 | 0.061846    | 19 Rpl24   |
| 4.71E-06 | 0.336225722  | 0.89  | 0.767 | 0.062185742 | 19 Rpl21   |
| 4.93E-06 | 0.312729828  | 0.973 | 0.809 | 0.064966737 | 19 Rps23   |
| 4.93E-06 | 0.324563185  | 0.932 | 0.773 | 0.06496746  | 19 H3f3a   |
| 5.08E-06 | 0.36684896   | 0.658 | 0.364 | 0.067058901 | 19 Tuba1b  |
| 5.22E-06 | 0.495597629  | 0.26  | 0.097 | 0.068840137 | 19 N4bp2l2 |
| 5.38E-06 | -1.421552398 | 0.041 | 0.277 | 0.07095041  | 19 Ccr2    |
| 5.98E-06 | 0.343642096  | 0.849 | 0.72  | 0.078849178 | 19 Rpl27a  |
| 6.42E-06 | 0.457469595  | 0.726 | 0.467 | 0.084672968 | 19 Rpl29   |
| 6.51E-06 | 0.372199029  | 0.589 | 0.315 | 0.085817479 | 19 Gm10116 |
| 6.95E-06 | 0.423872315  | 0.329 | 0.138 | 0.091677988 | 19 Snhg9   |
| 7.03E-06 | 0.47371306   | 0.562 | 0.314 | 0.092788849 | 19 Snrpe   |
| 7.55E-06 | 0.416895266  | 0.74  | 0.474 | 0.099610035 | 19 Rps27l  |
| 7.68E-06 | 0.691004301  | 0.301 | 0.128 | 0.101289331 | 19 Usp1    |
| 7.73E-06 | -0.997550424 | 0.274 | 0.466 | 0.10201356  | 19 Rac2    |
| 8.42E-06 | 0.410791276  | 0.644 | 0.371 | 0.111026487 | 19 Tmem256 |
| 8.53E-06 | -0.840206743 | 0.151 | 0.395 | 0.112528645 | 19 Ywhaz   |
| 9.45E-06 | -1.130695989 | 0.068 | 0.295 | 0.124617462 | 19 Pkm     |
| 9.45E-06 | 0.476182842  | 0.589 | 0.335 | 0.124644059 | 19 Srsf3   |
| 9.62E-06 | 0.435958294  | 0.534 | 0.28  | 0.126921758 | 19 Tra2b   |
| 1.01E-05 | -0.622542646 | 0.671 | 0.772 | 0.132853276 | 19 B2m     |
| 1.03E-05 | -0.922476056 | 0.205 | 0.434 | 0.135392564 | 19 Tspo    |

|          |              |       |       |             |               |
|----------|--------------|-------|-------|-------------|---------------|
| 1.07E-05 | -0.987040579 | 0.123 | 0.358 | 0.141644806 | 19 Fam49b     |
| 1.11E-05 | 0.394838681  | 0.644 | 0.37  | 0.146911806 | 19 Srrm2      |
| 1.14E-05 | 0.50498135   | 0.329 | 0.144 | 0.15057109  | 19 Rbm15      |
| 1.15E-05 | 0.298332748  | 0.986 | 0.901 | 0.152089049 | 19 Rpl37      |
| 1.23E-05 | 0.419459437  | 0.301 | 0.124 | 0.162007457 | 19 Bclaf1     |
| 1.30E-05 | -1.233656303 | 0.041 | 0.259 | 0.171857149 | 19 Anxa2      |
| 1.31E-05 | 0.543075715  | 0.452 | 0.232 | 0.172328301 | 19 Usp50      |
| 1.35E-05 | 0.372471474  | 0.356 | 0.157 | 0.1787049   | 19 Tardbp     |
| 1.37E-05 | -1.140506003 | 0.123 | 0.343 | 0.181167173 | 19 Ifitm2     |
| 1.48E-05 | 0.527009316  | 0.479 | 0.251 | 0.195007982 | 19 Eif3a      |
| 1.49E-05 | 0.49344147   | 0.274 | 0.111 | 0.195927063 | 19 Gadd45gip1 |
| 1.52E-05 | 0.422166586  | 0.411 | 0.194 | 0.19996269  | 19 Smc4       |
| 1.53E-05 | 0.472175019  | 0.548 | 0.302 | 0.201269851 | 19 Hnrnpm     |
| 1.58E-05 | 0.422766269  | 0.411 | 0.197 | 0.208388795 | 19 Gm10020    |
| 1.60E-05 | 0.565765786  | 0.26  | 0.106 | 0.211291234 | 19 Adam10     |
| 1.67E-05 | 0.519391224  | 0.315 | 0.139 | 0.220193699 | 19 Dtymk      |
| 1.72E-05 | 0.527036115  | 0.26  | 0.103 | 0.227506608 | 19 Cmc2       |
| 1.73E-05 | -0.812025325 | 0.164 | 0.406 | 0.228739744 | 19 Dbi        |
| 1.83E-05 | -1.076946409 | 0.11  | 0.331 | 0.241675564 | 19 Cd53       |
| 1.90E-05 | 0.33668188   | 0.932 | 0.745 | 0.250973101 | 19 Rps6       |
| 1.93E-05 | 0.508273376  | 0.288 | 0.118 | 0.254725306 | 19 Cdc42ep3   |
| 1.99E-05 | -0.810175041 | 0.274 | 0.48  | 0.262376745 | 19 Gng5       |
| 2.01E-05 | 0.518904656  | 0.425 | 0.212 | 0.26514593  | 19 Rad21      |
| 2.06E-05 | 0.367034711  | 0.37  | 0.167 | 0.271098238 | 19 Prpf4b     |
| 2.19E-05 | -1.140033681 | 0.137 | 0.348 | 0.288722954 | 19 H2afy      |
| 2.38E-05 | 0.525599541  | 0.466 | 0.246 | 0.314119181 | 19 Rbm25      |
| 2.38E-05 | 0.406135909  | 0.384 | 0.175 | 0.314194877 | 19 Cltc       |
| 2.39E-05 | -1.069583514 | 0.096 | 0.319 | 0.314939135 | 19 Lsp1       |
| 2.39E-05 | -1.029785051 | 0.068 | 0.286 | 0.314983142 | 19 Cmtm7      |
| 2.43E-05 | -1.120372246 | 0.055 | 0.268 | 0.32009172  | 19 Clec4a2    |
| 2.60E-05 | 0.67915979   | 0.329 | 0.153 | 0.342449678 | 19 Ube2c      |

|          |              |       |       |             |            |
|----------|--------------|-------|-------|-------------|------------|
| 2.74E-05 | 0.433835646  | 0.37  | 0.174 | 0.361483654 | 19 Siva1   |
| 2.81E-05 | -1.041320564 | 0.055 | 0.269 | 0.370884894 | 19 Cotl1   |
| 2.90E-05 | 0.256879476  | 0.932 | 0.706 | 0.383011974 | 19 Rpl31   |
| 2.91E-05 | 0.495424694  | 0.288 | 0.123 | 0.384212594 | 19 Anapc5  |
| 2.92E-05 | 0.372287402  | 0.575 | 0.318 | 0.385172041 | 19 Hnrnpu  |
| 3.07E-05 | -1.082622425 | 0.055 | 0.266 | 0.405236676 | 19 Ncf1    |
| 3.23E-05 | -0.710251713 | 0.37  | 0.557 | 0.426177548 | 19 Calm1   |
| 3.32E-05 | 0.428410313  | 0.301 | 0.131 | 0.437616762 | 19 Ubap2l  |
| 3.51E-05 | -1.030814679 | 0.082 | 0.289 | 0.46359877  | 19 Tagln2  |
| 3.56E-05 | 0.538414377  | 0.274 | 0.119 | 0.470051458 | 19 Ssrp1   |
| 3.61E-05 | 0.592468071  | 0.288 | 0.127 | 0.475593786 | 19 Zranb2  |
| 3.65E-05 | -1.103834784 | 0.068 | 0.281 | 0.481270306 | 19 Slpi    |
| 3.86E-05 | 0.392584262  | 0.671 | 0.424 | 0.509722353 | 19 Eef2    |
| 3.94E-05 | -1.089522268 | 0.082 | 0.293 | 0.520367634 | 19 Mgst1   |
| 4.67E-05 | -0.919313228 | 0.11  | 0.325 | 0.616414578 | 19 Celf2   |
| 4.72E-05 | -1.042509685 | 0.11  | 0.318 | 0.622521849 | 19 Ptprc   |
| 4.96E-05 | 0.363426468  | 0.699 | 0.448 | 0.654390481 | 19 Uqcr11  |
| 5.03E-05 | -0.947510382 | 0.123 | 0.335 | 0.663358231 | 19 Clec12a |
| 5.07E-05 | -1.146009366 | 0.11  | 0.32  | 0.669181531 | 19 Ms4a6c  |
| 5.27E-05 | 0.508004335  | 0.301 | 0.137 | 0.695634656 | 19 Gmnn    |
| 5.36E-05 | 0.373410016  | 0.548 | 0.299 | 0.706475121 | 19 Erh     |
| 5.76E-05 | -0.907661359 | 0.137 | 0.351 | 0.759583506 | 19 Ptpn18  |
| 6.23E-05 | 0.267674534  | 0.918 | 0.759 | 0.822423039 | 19 Rps3    |
| 6.25E-05 | 0.335680859  | 0.795 | 0.502 | 0.825012579 | 19 Rpl22l1 |
| 6.29E-05 | 0.444387724  | 0.329 | 0.155 | 0.829961094 | 19 Lmnb1   |
| 6.70E-05 | 0.430095316  | 0.479 | 0.262 | 0.884058383 | 19 Ndufs6  |
| 6.74E-05 | -0.968144926 | 0.068 | 0.271 | 0.889356357 | 19 Gpi1    |
| 7.13E-05 | 0.447854853  | 0.288 | 0.125 | 0.940854779 | 19 Cnot6   |
| 7.45E-05 | -1.098228475 | 0.137 | 0.335 | 0.983148212 | 19 Notch2  |
| 7.46E-05 | 0.275626329  | 0.918 | 0.719 | 0.984308127 | 19 Rps17   |
| 7.63E-05 | -0.996796627 | 0.082 | 0.283 | 1           | 19 Rap1b   |

|            |              |       |       |   |             |
|------------|--------------|-------|-------|---|-------------|
| 7.99E-05   | -1.083880025 | 0.055 | 0.252 | 1 | 19 Tmcc1    |
| 8.06E-05   | 0.4335133    | 0.288 | 0.128 | 1 | 19 Eif4e    |
| 8.74E-05   | -0.986509429 | 0.082 | 0.28  | 1 | 19 Iqgap1   |
| 9.24E-05   | 0.478708718  | 0.274 | 0.12  | 1 | 19 Abcf1    |
| 9.39E-05   | -0.96481648  | 0.11  | 0.303 | 1 | 19 Tpm3     |
| 1.00E-04   | 0.269482171  | 0.301 | 0.132 | 1 | 19 Smchd1   |
| 0.00010496 | 0.324285116  | 0.795 | 0.576 | 1 | 19 Rpl15    |
| 0.00010971 | -1.060833354 | 0.068 | 0.259 | 1 | 19 Cebpb    |
| 0.00011023 | -0.861419224 | 0.274 | 0.451 | 1 | 19 Psma7    |
| 0.00011487 | 0.348903396  | 0.89  | 0.702 | 1 | 19 mt-Cytb  |
| 0.00011519 | -0.988368934 | 0.068 | 0.258 | 1 | 19 Flna     |
| 0.00011944 | 0.297298591  | 0.836 | 0.66  | 1 | 19 Rps20    |
| 0.00012344 | 0.405896867  | 0.315 | 0.151 | 1 | 19 Comt     |
| 0.00012363 | 0.34112383   | 0.781 | 0.522 | 1 | 19 Tma7     |
| 0.00014219 | 0.449405714  | 0.411 | 0.221 | 1 | 19 Snrpd1   |
| 0.00014256 | 0.359508416  | 0.288 | 0.13  | 1 | 19 Dnajc19  |
| 0.00014339 | 0.296358263  | 0.89  | 0.726 | 1 | 19 Rps25    |
| 0.00015104 | 0.306219423  | 0.822 | 0.583 | 1 | 19 Gm26917  |
| 0.00015418 | 0.290060845  | 0.438 | 0.227 | 1 | 19 Anp32e   |
| 0.00016416 | -0.778160367 | 0.164 | 0.37  | 1 | 19 Capza2   |
| 0.00016964 | 0.426746922  | 0.384 | 0.192 | 1 | 19 Klf13    |
| 0.00018297 | 0.355530318  | 0.507 | 0.29  | 1 | 19 Sarnp    |
| 0.0001898  | -0.950099319 | 0.068 | 0.253 | 1 | 19 Psmb8    |
| 0.00019882 | 0.268300782  | 0.918 | 0.764 | 1 | 19 Rpl36    |
| 0.00020041 | 0.258974398  | 0.329 | 0.153 | 1 | 19 Bnip3l   |
| 0.00020879 | 0.362485751  | 0.493 | 0.268 | 1 | 19 Romo1    |
| 0.00021195 | -0.975582946 | 0.096 | 0.277 | 1 | 19 Aldh2    |
| 0.00022026 | -1.436280086 | 0.192 | 0.361 | 1 | 19 Ifi27l2a |
| 0.00022959 | -0.827079993 | 0.082 | 0.273 | 1 | 19 Aldoa    |
| 0.00022993 | 0.388209874  | 0.356 | 0.178 | 1 | 19 Luc7l3   |
| 0.0002354  | 0.337723412  | 0.301 | 0.14  | 1 | 19 Pim1     |

|            |              |       |       |   |                  |
|------------|--------------|-------|-------|---|------------------|
| 0.00023873 | 0.373384432  | 0.671 | 0.429 | 1 | 19 Serinc3       |
| 0.0002409  | 0.326868672  | 0.466 | 0.257 | 1 | 19 Atp5g3        |
| 0.00025325 | -0.795448161 | 0.26  | 0.426 | 1 | 19 Tkt           |
| 0.00025495 | -0.921789148 | 0.082 | 0.261 | 1 | 19 Aprt          |
| 0.00027007 | 0.305407231  | 0.699 | 0.457 | 1 | 19 Ndufa2        |
| 0.00027871 | 0.31893973   | 0.507 | 0.286 | 1 | 19 Sdcbp         |
| 0.00030778 | 0.273533665  | 0.288 | 0.131 | 1 | 19 Ctcf          |
| 0.0003078  | -0.747030963 | 0.288 | 0.443 | 1 | 19 Actr2         |
| 0.00030816 | 0.414394992  | 0.356 | 0.19  | 1 | 19 Hnrnpl        |
| 0.00030952 | 0.457262552  | 0.548 | 0.334 | 1 | 19 Nucks1        |
| 0.00031499 | -0.672664631 | 0.425 | 0.543 | 1 | 19 Ubb           |
| 0.00032032 | 0.402851763  | 0.329 | 0.165 | 1 | 19 Yme1l1        |
| 0.00032386 | -0.926927828 | 0.11  | 0.283 | 1 | 19 Myl12b        |
| 0.00033109 | 0.343716567  | 0.63  | 0.432 | 1 | 19 Rpl13-ps3     |
| 0.00034296 | -0.477538872 | 0.63  | 0.716 | 1 | 19 Cfl1          |
| 0.00034907 | 0.394585401  | 0.603 | 0.41  | 1 | 19 2010107E04Rik |
| 0.00035339 | 0.253879214  | 0.918 | 0.771 | 1 | 19 Rps3a1        |
| 0.00035815 | 0.355500495  | 0.452 | 0.253 | 1 | 19 Ncl           |
| 0.00036424 | 0.359718272  | 0.301 | 0.146 | 1 | 19 Sod1          |
| 0.00037639 | 0.292863834  | 0.507 | 0.282 | 1 | 19 Eef1g         |
| 0.00039632 | -0.922582778 | 0.11  | 0.281 | 1 | 19 Lcp1          |
| 0.00039702 | -0.838168348 | 0.178 | 0.355 | 1 | 19 Msrb1         |
| 0.00041275 | -0.855133698 | 0.082 | 0.26  | 1 | 19 Lmo4          |
| 0.00042485 | 0.316879355  | 0.356 | 0.181 | 1 | 19 2310036O22Rik |
| 0.00043548 | -0.94513567  | 0.123 | 0.296 | 1 | 19 Sat1          |
| 0.00044082 | 0.334436099  | 0.342 | 0.174 | 1 | 19 Mrpl18        |
| 0.00044227 | 0.419072719  | 0.301 | 0.152 | 1 | 19 Srsf11        |
| 0.00047968 | 0.422941055  | 0.63  | 0.426 | 1 | 19 Sumo2         |
| 0.00050429 | 0.409711639  | 0.466 | 0.28  | 1 | 19 Atp5b         |
| 0.00052321 | 0.382824019  | 0.356 | 0.187 | 1 | 19 Thoc7         |
| 0.00053032 | 0.311773098  | 0.411 | 0.219 | 1 | 19 Sf3b6         |



|            |              |       |       |   |               |
|------------|--------------|-------|-------|---|---------------|
| 0.00057618 | 0.389453546  | 0.356 | 0.189 | 1 | 19 Elavl1     |
| 0.00060068 | -1.339776063 | 0.11  | 0.275 | 1 | 19 Prtn3      |
| 0.00061854 | 0.29374967   | 0.384 | 0.204 | 1 | 19 Ndufa5     |
| 0.00071081 | -0.807228071 | 0.164 | 0.328 | 1 | 19 Lamtor4    |
| 0.00071092 | -0.717830313 | 0.26  | 0.419 | 1 | 19 Cdc42      |
| 0.00072152 | 0.314588694  | 0.699 | 0.451 | 1 | 19 Uqcr10     |
| 0.00072443 | 0.290439153  | 0.699 | 0.467 | 1 | 19 Rps18-ps3  |
| 0.00073147 | 0.25943169   | 0.356 | 0.184 | 1 | 19 Ptp4a2     |
| 0.00074304 | 0.324834035  | 0.315 | 0.161 | 1 | 19 Nhp2l1     |
| 0.00079404 | 0.271185871  | 0.534 | 0.319 | 1 | 19 Gm10036    |
| 0.00080168 | 0.329709251  | 0.466 | 0.275 | 1 | 19 Arglu1     |
| 0.00081806 | -0.750607103 | 0.151 | 0.319 | 1 | 19 Capza1     |
| 0.00086972 | -0.801794185 | 0.178 | 0.335 | 1 | 19 Irf2bp2    |
| 0.00091175 | -0.662162284 | 0.164 | 0.339 | 1 | 19 Clic1      |
| 0.00092669 | 0.344658679  | 0.712 | 0.519 | 1 | 19 Atp5h      |
| 0.00098871 | -0.593220999 | 0.479 | 0.561 | 1 | 19 Calm2      |
| 0.00102802 | -0.888240254 | 0.219 | 0.371 | 1 | 19 Myh9       |
| 0.00105013 | 0.257822332  | 0.849 | 0.652 | 1 | 19 mt-Co2     |
| 0.00106752 | -0.77470407  | 0.137 | 0.299 | 1 | 19 Cdk2ap2    |
| 0.00107804 | -0.772639074 | 0.548 | 0.588 | 1 | 19 Hmgn2      |
| 0.00117976 | 0.276223051  | 0.479 | 0.289 | 1 | 19 D8Ertd738e |
| 0.00121783 | 0.392277263  | 0.603 | 0.426 | 1 | 19 Hnrnpk     |
| 0.00124516 | 0.344674996  | 0.315 | 0.171 | 1 | 19 Rdx        |
| 0.0012969  | 0.428399592  | 0.329 | 0.182 | 1 | 19 Erdr1      |
| 0.00131246 | -0.526111269 | 0.397 | 0.537 | 1 | 19 Mrpl33     |
| 0.00132897 | -0.773456783 | 0.151 | 0.306 | 1 | 19 Taldo1     |
| 0.00134148 | 0.302403741  | 0.342 | 0.185 | 1 | 19 Srsf6      |
| 0.00137398 | 0.298466629  | 0.315 | 0.164 | 1 | 19 Paip1      |
| 0.00152619 | 0.264801122  | 0.397 | 0.222 | 1 | 19 Mrps14     |
| 0.00158693 | 0.376104054  | 0.575 | 0.38  | 1 | 19 Minos1     |
| 0.0016706  | 0.387556405  | 0.301 | 0.162 | 1 | 19 H2afx      |

|            |              |       |       |   |             |
|------------|--------------|-------|-------|---|-------------|
| 0.00175941 | -0.400076929 | 1     | 0.997 | 1 | 19 Malat1   |
| 0.001809   | -0.827965496 | 0.219 | 0.36  | 1 | 19 H2-K1    |
| 0.00186423 | -0.762851967 | 0.123 | 0.271 | 1 | 19 Abracl   |
| 0.00188849 | 0.376381861  | 0.301 | 0.163 | 1 | 19 Larp4b   |
| 0.00189908 | 0.259910666  | 0.301 | 0.155 | 1 | 19 Emg1     |
| 0.00191534 | 0.309010628  | 0.356 | 0.197 | 1 | 19 Al662270 |
| 0.00195838 | 0.281084524  | 0.425 | 0.25  | 1 | 19 Ndufb2   |
| 0.00204839 | 0.348820217  | 0.384 | 0.219 | 1 | 19 Top1     |
| 0.00211631 | 0.37122855   | 0.616 | 0.425 | 1 | 19 Rbm3     |
| 0.0022262  | 0.276476764  | 0.808 | 0.601 | 1 | 19 Cox7c    |
| 0.00254464 | 0.267819521  | 0.315 | 0.166 | 1 | 19 Higd1a   |
| 0.00256263 | -0.581816243 | 0.384 | 0.505 | 1 | 19 Mbnl1    |
| 0.00258581 | 0.298671705  | 0.315 | 0.173 | 1 | 19 Uqcc2    |
| 0.00260435 | -0.824898307 | 0.342 | 0.429 | 1 | 19 Prdx1    |
| 0.0027436  | -0.820783918 | 0.151 | 0.285 | 1 | 19 Cd44     |
| 0.00277863 | 0.316243385  | 0.315 | 0.174 | 1 | 19 Stag2    |
| 0.00281601 | 0.393621164  | 0.548 | 0.364 | 1 | 19 Ran      |
| 0.00290465 | 0.282751456  | 0.288 | 0.15  | 1 | 19 Map1lc3b |
| 0.00296245 | -0.577007158 | 0.274 | 0.416 | 1 | 19 Gapdh    |
| 0.00328862 | -0.705430529 | 0.192 | 0.325 | 1 | 19 Scp2     |
| 0.00353357 | 0.274693031  | 0.329 | 0.183 | 1 | 19 Mrpl52   |
| 0.00357559 | 0.300489563  | 0.466 | 0.291 | 1 | 19 Nap1l1   |
| 0.00382699 | -0.679827149 | 0.11  | 0.252 | 1 | 19 Ostf1    |
| 0.00394175 | 0.26308814   | 0.63  | 0.449 | 1 | 19 Hnrnpa3  |
| 0.00560348 | 0.296884784  | 0.26  | 0.143 | 1 | 19 Mat2a    |
| 0.00655016 | 0.358954563  | 0.384 | 0.239 | 1 | 19 Ube2s    |
| 0.00669675 | 0.275740724  | 0.288 | 0.16  | 1 | 19 Wnk1     |
| 0.0072629  | 0.292905037  | 0.384 | 0.238 | 1 | 19 Eif5b    |
| 0.00745853 | 0.287678292  | 0.315 | 0.186 | 1 | 19 Skp1a    |
| 0.00832138 | 0.281220432  | 0.274 | 0.156 | 1 | 19 Dpy30    |
| 0.00928852 | -0.46662445  | 0.425 | 0.508 | 1 | 19 Sec61b   |

|            |              |       |       |           |    |               |
|------------|--------------|-------|-------|-----------|----|---------------|
| 0.00953458 | -0.725797385 | 0.137 | 0.256 | 1         | 19 | Btg1          |
| 0.00959581 | 0.330544194  | 0.315 | 0.196 | 1         | 19 | 2410015M2ORik |
| 0          | 2.847547529  | 0.771 | 0.006 | 0         | 20 | C1qc          |
| 0          | 2.441741056  | 0.629 | 0.003 | 0         | 20 | C1qa          |
| 0          | 2.409943012  | 0.686 | 0.004 | 0         | 20 | C1qb          |
| 2.92E-276  | 2.033223626  | 0.543 | 0.005 | 3.85E-272 | 20 | Mrc1          |
| 7.86E-272  | 2.010386719  | 0.429 | 0.003 | 1.04E-267 | 20 | Fcna          |
| 3.61E-250  | 1.694865919  | 0.286 | 0.001 | 4.76E-246 | 20 | Cd5l          |
| 7.06E-174  | 2.286361789  | 0.486 | 0.008 | 9.31E-170 | 20 | Axl           |
| 3.76E-158  | 3.384127364  | 0.8   | 0.027 | 4.96E-154 | 20 | Vcam1         |
| 4.26E-153  | 1.978552227  | 0.429 | 0.007 | 5.61E-149 | 20 | Maf           |
| 6.63E-131  | 2.246856622  | 0.629 | 0.019 | 8.75E-127 | 20 | Sdc3          |
| 1.40E-130  | 2.110448301  | 0.6   | 0.017 | 1.85E-126 | 20 | Lgmn          |
| 1.70E-128  | 2.008689137  | 0.457 | 0.01  | 2.24E-124 | 20 | Pld3          |
| 4.69E-104  | 2.028417519  | 0.429 | 0.011 | 6.18E-100 | 20 | Mafb          |
| 7.91E-95   | 1.521989522  | 0.257 | 0.004 | 1.04E-90  | 20 | Cd163         |
| 3.88E-83   | 2.740880002  | 0.571 | 0.027 | 5.11E-79  | 20 | Hmox1         |
| 7.73E-69   | 1.934485954  | 0.4   | 0.015 | 1.02E-64  | 20 | Tcf7l2        |
| 3.76E-57   | 1.488812876  | 0.314 | 0.011 | 4.96E-53  | 20 | Ckb           |
| 2.71E-52   | 2.659611448  | 0.686 | 0.065 | 3.57E-48  | 20 | Slc40a1       |
| 1.00E-33   | 1.763763771  | 0.371 | 0.028 | 1.32E-29  | 20 | Lpl           |
| 5.70E-32   | 2.057187919  | 0.657 | 0.096 | 7.52E-28  | 20 | Sepp1         |
| 7.50E-32   | 1.564462676  | 0.4   | 0.034 | 9.89E-28  | 20 | Trf           |
| 1.17E-29   | 2.076959682  | 0.657 | 0.104 | 1.55E-25  | 20 | Marcks        |
| 2.26E-27   | 1.431882638  | 0.257 | 0.016 | 2.98E-23  | 20 | Fcgrt         |
| 2.27E-25   | 2.138772435  | 0.686 | 0.131 | 2.99E-21  | 20 | Apoe          |
| 3.38E-22   | 1.622713191  | 0.6   | 0.11  | 4.46E-18  | 20 | Ctsd          |
| 4.87E-18   | 1.282377008  | 0.486 | 0.084 | 6.43E-14  | 20 | Aplp2         |
| 1.10E-17   | 1.075228351  | 0.314 | 0.037 | 1.45E-13  | 20 | Lgals3bp      |
| 2.50E-17   | 1.491612005  | 0.743 | 0.209 | 3.30E-13  | 20 | Grn           |
| 1.88E-14   | 1.100449666  | 0.343 | 0.052 | 2.49E-10  | 20 | Ptprj         |

**Macrophage**

|            |              |       |       |             |    |           |
|------------|--------------|-------|-------|-------------|----|-----------|
| 1.84E-12   | 1.096103874  | 0.343 | 0.06  | 2.43E-08    | 20 | Ccdc50    |
| 1.00E-11   | 1.634258364  | 0.629 | 0.21  | 1.32E-07    | 20 | Ctsb      |
| 2.66E-11   | 1.009653333  | 0.4   | 0.083 | 3.51E-07    | 20 | Cfp       |
| 3.93E-11   | 1.239372771  | 0.286 | 0.048 | 5.18E-07    | 20 | Glul      |
| 4.75E-11   | 1.412757061  | 0.429 | 0.104 | 6.26E-07    | 20 | Slc6a6    |
| 9.68E-09   | 0.945315067  | 0.343 | 0.081 | 0.000127665 | 20 | Man2b1    |
| 1.66E-08   | 0.961797662  | 1     | 0.998 | 0.000218632 | 20 | Malat1    |
| 2.39E-08   | 0.765822105  | 0.971 | 0.82  | 0.000315474 | 20 | Ftl1      |
| 7.11E-08   | 1.044492433  | 0.314 | 0.076 | 0.000937594 | 20 | Csf1r     |
| 1.09E-07   | 1.024437481  | 0.343 | 0.091 | 0.001433955 | 20 | Actn1     |
| 1.26E-07   | 1.007760781  | 0.8   | 0.542 | 0.001664473 | 20 | Psap      |
| 2.03E-07   | 0.81965985   | 0.886 | 0.641 | 0.002681099 | 20 | Fth1      |
| 2.88E-07   | 1.084836066  | 0.314 | 0.082 | 0.003794235 | 20 | Sirpa     |
| 6.97E-06   | -0.839560908 | 0.714 | 0.852 | 0.09190608  | 20 | Rpl13     |
| 1.09E-05   | 0.571381901  | 0.257 | 0.066 | 0.143172113 | 20 | Lair1     |
| 1.51E-05   | 0.835769784  | 0.257 | 0.072 | 0.198934638 | 20 | Nudcd3    |
| 2.45E-05   | 0.598491191  | 0.257 | 0.071 | 0.323554775 | 20 | Fxr1      |
| 3.05E-05   | 0.871204035  | 0.571 | 0.293 | 0.402769379 | 20 | Sat1      |
| 3.96E-05   | 0.855694661  | 0.257 | 0.077 | 0.522419257 | 20 | Ctsa      |
| 4.05E-05   | 0.696326821  | 0.829 | 0.648 | 0.534669504 | 20 | Itm2b     |
| 4.88E-05   | 1.047104096  | 0.257 | 0.077 | 0.64385428  | 20 | Rnf149    |
| 7.88E-05   | 0.794714551  | 0.286 | 0.097 | 1           | 20 | Kcnq1ot1  |
| 9.30E-05   | 0.702617952  | 0.257 | 0.079 | 1           | 20 | Stat1     |
| 0.00010331 | -0.704878655 | 0.743 | 0.868 | 1           | 20 | Rpl32     |
| 0.00011572 | 0.727022534  | 0.6   | 0.314 | 1           | 20 | Ptpcr     |
| 0.00013854 | 0.800877632  | 0.4   | 0.157 | 1           | 20 | Cd74      |
| 0.0001455  | -1.161453462 | 0.114 | 0.436 | 1           | 20 | Rpl13-ps3 |
| 0.00016629 | 0.718968987  | 0.257 | 0.084 | 1           | 20 | Atp6ap1   |
| 0.00018777 | 0.604454711  | 0.686 | 0.442 | 1           | 20 | Ddx5      |
| 0.00019394 | 0.728711282  | 0.343 | 0.136 | 1           | 20 | Adipor1   |
| 0.00020611 | 0.82198011   | 0.486 | 0.235 | 1           | 20 | Zeb2      |

|            |              |       |       |   |    |          |
|------------|--------------|-------|-------|---|----|----------|
| 0.00021257 | -0.580901139 | 0.571 | 0.821 | 1 | 20 | H2afz    |
| 0.00022494 | -0.744131563 | 0.514 | 0.723 | 1 | 20 | Rpl6     |
| 0.00023791 | 0.783847076  | 0.4   | 0.172 | 1 | 20 | Creg1    |
| 0.00024636 | -1.005859458 | 0.371 | 0.616 | 1 | 20 | Ly6c2    |
| 0.00024967 | -0.694985945 | 0.486 | 0.749 | 1 | 20 | Rps6     |
| 0.00028393 | -0.676131342 | 0.514 | 0.729 | 1 | 20 | Rps25    |
| 0.00030108 | 0.898794415  | 0.286 | 0.103 | 1 | 20 | Ctnnb1   |
| 0.00031219 | -0.809140365 | 0.371 | 0.633 | 1 | 20 | Uba52    |
| 0.00031619 | 0.632211266  | 0.286 | 0.103 | 1 | 20 | Tuba1c   |
| 0.0003447  | 0.765575378  | 0.314 | 0.125 | 1 | 20 | Tgfb1    |
| 0.00041737 | 0.749590692  | 0.343 | 0.141 | 1 | 20 | Rab1a    |
| 0.00043436 | 0.63415323   | 0.257 | 0.09  | 1 | 20 | AW112010 |
| 0.00044108 | -0.707525345 | 0.571 | 0.746 | 1 | 20 | Rpl24    |
| 0.0004867  | -0.764962817 | 0.571 | 0.712 | 1 | 20 | Rplp0    |
| 0.00049443 | 0.61337494   | 0.257 | 0.089 | 1 | 20 | Rtn4     |
| 0.00062389 | -0.7538282   | 0.343 | 0.613 | 1 | 20 | Gm11808  |
| 0.00072486 | -0.512636603 | 0.743 | 0.875 | 1 | 20 | Rpl18a   |
| 0.00073222 | -0.806826801 | 0.286 | 0.552 | 1 | 20 | Cox6b1   |
| 0.00082324 | 0.599747635  | 0.429 | 0.205 | 1 | 20 | Ctss     |
| 0.00085808 | 0.551110622  | 0.543 | 0.306 | 1 | 20 | Canx     |
| 0.00085956 | -0.969057516 | 0.2   | 0.471 | 1 | 20 | Gm8730   |
| 0.00100783 | -0.513142386 | 0.829 | 0.882 | 1 | 20 | Rps14    |
| 0.00102077 | -0.671050672 | 0.486 | 0.71  | 1 | 20 | Rpl31    |
| 0.00113155 | -0.994530864 | 0.057 | 0.327 | 1 | 20 | Eif3f    |
| 0.00124349 | -0.546157821 | 0.571 | 0.782 | 1 | 20 | Rpl26    |
| 0.00135398 | -0.903607851 | 0.114 | 0.387 | 1 | 20 | Tmem258  |
| 0.00139468 | 0.652182121  | 0.571 | 0.357 | 1 | 20 | H2-K1    |
| 0.00141808 | -0.502554004 | 0.857 | 0.902 | 1 | 20 | Rpl37    |
| 0.00145002 | -0.654373743 | 0.571 | 0.726 | 1 | 20 | Rps4x    |
| 0.00146639 | -0.665039617 | 0.543 | 0.692 | 1 | 20 | Rps7     |
| 0.00163727 | 0.643573746  | 0.514 | 0.287 | 1 | 20 | Sdcbp    |

|            |              |       |       |   |    |            |
|------------|--------------|-------|-------|---|----|------------|
| 0.00177767 | 0.60012024   | 0.457 | 0.255 | 1 | 20 | Alyref     |
| 0.00186522 | 0.73463953   | 0.286 | 0.121 | 1 | 20 | Slc39a1    |
| 0.00188255 | -0.548471744 | 0.629 | 0.754 | 1 | 20 | Gm10076    |
| 0.00200757 | 0.566729049  | 0.371 | 0.176 | 1 | 20 | Cltc       |
| 0.00205336 | -0.516928602 | 0.686 | 0.843 | 1 | 20 | Ptma       |
| 0.00222921 | 0.728755391  | 0.286 | 0.127 | 1 | 20 | Ctsc       |
| 0.00230411 | -0.469558554 | 0.829 | 0.897 | 1 | 20 | Rps19      |
| 0.00231969 | -0.770188314 | 0.371 | 0.577 | 1 | 20 | Rpl10a     |
| 0.00233029 | 0.702302501  | 0.4   | 0.209 | 1 | 20 | Lamp1      |
| 0.00235277 | 0.65748079   | 0.286 | 0.12  | 1 | 20 | Map3k1     |
| 0.00248996 | -0.586654329 | 0.514 | 0.725 | 1 | 20 | Rps26      |
| 0.00259209 | 0.682470842  | 0.314 | 0.152 | 1 | 20 | Comt       |
| 0.00276702 | 0.564520786  | 0.257 | 0.101 | 1 | 20 | Hcls1      |
| 0.00285251 | 0.54621952   | 0.314 | 0.143 | 1 | 20 | Ppp2ca     |
| 0.00291267 | 0.776295034  | 0.257 | 0.109 | 1 | 20 | Dennd5a    |
| 0.00336563 | 0.251062972  | 0.829 | 0.631 | 1 | 20 | Cst3       |
| 0.00351164 | 0.895474697  | 0.686 | 0.475 | 1 | 20 | Retnlg     |
| 0.00395611 | -0.578780014 | 0.514 | 0.697 | 1 | 20 | Rpl10      |
| 0.00421615 | 0.404942619  | 0.257 | 0.104 | 1 | 20 | Insig1     |
| 0.00434187 | 0.66425944   | 0.314 | 0.155 | 1 | 20 | Akr1a1     |
| 0.00448867 | -0.989674338 | 0.114 | 0.328 | 1 | 20 | Ap3s1      |
| 0.00491005 | -0.603681402 | 0.371 | 0.592 | 1 | 20 | Rpl4       |
| 0.00509433 | -0.480954064 | 0.771 | 0.836 | 1 | 20 | Rps18      |
| 0.00525856 | -0.910810144 | 0.114 | 0.327 | 1 | 20 | Lamtor4    |
| 0.00558331 | -0.606763401 | 0.571 | 0.671 | 1 | 20 | Rpl23a-ps3 |
| 0.00590502 | -0.842495775 | 0.114 | 0.341 | 1 | 20 | Ifitm2     |
| 0.00613741 | -0.757836933 | 0.257 | 0.471 | 1 | 20 | Rps18-ps3  |
| 0.00613913 | -0.705037164 | 0.371 | 0.589 | 1 | 20 | Hmgn2      |
| 0.00623971 | -0.510513906 | 0.6   | 0.718 | 1 | 20 | Rpl11      |
| 0.00628179 | -0.783849191 | 0.4   | 0.555 | 1 | 20 | Rps2       |
| 0.00632161 | 0.553226842  | 0.257 | 0.112 | 1 | 20 | Snx5       |

|            |              |       |       |   |    |        |
|------------|--------------|-------|-------|---|----|--------|
| 0.00640215 | -0.513609885 | 0.229 | 0.521 | 1 | 20 | Snrpg  |
| 0.0067329  | -0.654065486 | 0.4   | 0.58  | 1 | 20 | Rpl15  |
| 0.00715411 | -0.442626539 | 0.714 | 0.805 | 1 | 20 | Rps24  |
| 0.00718204 | -0.678273021 | 0.543 | 0.685 | 1 | 20 | Plac8  |
| 0.00809937 | 0.57359517   | 0.257 | 0.119 | 1 | 20 | Tm9sf2 |
| 0.00832386 | -0.512942562 | 0.514 | 0.71  | 1 | 20 | Myl6   |
| 0.00838122 | -0.478895189 | 0.686 | 0.785 | 1 | 20 | Rps5   |
| 0.00851243 | -0.555737513 | 0.4   | 0.601 | 1 | 20 | Rpl3   |
| 0.00877925 | 0.509565163  | 0.343 | 0.182 | 1 | 20 | Vsir   |
| 0.0096764  | -0.822668134 | 0.114 | 0.309 | 1 | 20 | Ppp1ca |

**Table 1.** Markers defining each of the 20 clusters identified in **Fig. 1A**.

pct.1 represents the percent of the cluster expression a specific gene.

pct.2 represent the percent of cells outside that cluster that express the gene
